# Supplementary material
Source: publisher figshare collection journal article supplement (https://acs.figshare.com/ndownloader/files/4383352)
Supplement: Supplementary file 1 [file 4383352]

# Supplementary Material (ESI) for Inorg. Chem. 
# This journal is (c) ACS 2009

data_global
_journal_name_full               'Inorg. Chem.'
_journal_coden_cambridge         ?
_journal_year                    ?
_journal_volume                  ?
_journal_page_first              ?
_publ_contact_author_name        'Yinfeng Han'
_publ_contact_author_email       hanyfeng@yahoo.cn
loop_
_publ_author_name
Yinfeng Han


data_1La
_database_code_depnum_ccdc_archive 'CCDC 745285'
_audit_creation_method           SHELXL-2000
_chemical_name_systematic        
;
?
;
_chemical_name_common             ? 
_chemical_melting_point           ? 
_chemical_formula_moiety          'C90 H81 La6 N6 O45, 3(C3 H7 N O)'  
_chemical_formula_sum 
 'C99 H102 La6 N9 O48' 
_chemical_formula_weight          3019.36 
 
loop_ 
 _atom_type_symbol 
 _atom_type_description 
 _atom_type_scat_dispersion_real 
 _atom_type_scat_dispersion_imag 
 _atom_type_scat_source 
 'C'  'C'   0.0033   0.0016 
 'International Tables Vol C Tables 4.2.6.8 and 6.1.1.4' 
 'H'  'H'   0.0000   0.0000 
 'International Tables Vol C Tables 4.2.6.8 and 6.1.1.4' 
 'N'  'N'   0.0061   0.0033 
 'International Tables Vol C Tables 4.2.6.8 and 6.1.1.4' 
 'O'  'O'   0.0106   0.0060 
 'International Tables Vol C Tables 4.2.6.8 and 6.1.1.4' 
 'La'  'La'  -0.2871   2.4523 
 'International Tables Vol C Tables 4.2.6.8 and 6.1.1.4' 
 
_symmetry_cell_setting            'triclinic' 
_symmetry_space_group_name_H-M    'p -1' 
_symmetry_space_group_name_Hall   '-p 1'
 
loop_ 
 _symmetry_equiv_pos_as_xyz 
 'x, y, z' 
 '-x, -y, -z' 
 
_cell_length_a                    11.1068(12) 
_cell_length_b                    17.7727(19) 
_cell_length_c                    29.228(3) 
_cell_angle_alpha                 86.624(2) 
_cell_angle_beta                  79.689(2) 
_cell_angle_gamma                 73.275(2) 
_cell_volume                      5436.1(10) 
_cell_formula_units_Z             2 
_cell_measurement_temperature     298(2) 
_cell_measurement_reflns_used     3827 
_cell_measurement_theta_min       2.85 
_cell_measurement_theta_max       23.85 
 
_exptl_crystal_description        block
_exptl_crystal_colour             colorless
_exptl_crystal_size_max           0.30 
_exptl_crystal_size_mid           0.27 
_exptl_crystal_size_min           0.25 
_exptl_crystal_density_meas       ? 
_exptl_crystal_density_diffrn     1.845 
_exptl_crystal_density_method     'not measured' 
_exptl_crystal_F_000              2970 
_exptl_absorpt_coefficient_mu     2.404 
_exptl_absorpt_correction_type    'multi-scan'
_exptl_absorpt_correction_T_min   0.5325 
_exptl_absorpt_correction_T_max   0.5848 
_exptl_absorpt_process_details    'SADABS(Sheldrick,2003)'
 
_exptl_special_details 
; 
 ? 
; 
 
_diffrn_ambient_temperature       298(2) 
_diffrn_radiation_wavelength      0.71073 
_diffrn_radiation_type            MoK\a 
_diffrn_radiation_source          'fine-focus sealed tube' 
_diffrn_radiation_monochromator   graphite 
_diffrn_measurement_device_type  'Bruker Smart Apex CCD area detector'
_diffrn_measurement_method       'phi and omega scans'
_diffrn_detector_area_resol_mean  ? 
_diffrn_standards_number          ? 
_diffrn_standards_interval_count  ? 
_diffrn_standards_interval_time   ? 
_diffrn_standards_decay_%         ? 
_diffrn_reflns_number             28366 
_diffrn_reflns_av_R_equivalents   0.0488 
_diffrn_reflns_av_sigmaI/netI     0.0656 
_diffrn_reflns_limit_h_min        -13 
_diffrn_reflns_limit_h_max        13 
_diffrn_reflns_limit_k_min        -19 
_diffrn_reflns_limit_k_max        21 
_diffrn_reflns_limit_l_min        -35 
_diffrn_reflns_limit_l_max        20 
_diffrn_reflns_theta_min          1.85 
_diffrn_reflns_theta_max          25.50 
_reflns_number_total              19864 
_reflns_number_gt                 15393 
_reflns_threshold_expression      >2sigma(I) 
 
_computing_data_collection        'SMART(Bruker, 2003)'
_computing_cell_refinement        'SAINTPLUS(Bruker, 2003)'
_computing_data_reduction         'SAINTPLUS'
_computing_structure_solution     'SHELXS-97 (Sheldrick, 2008)' 
_computing_structure_refinement   'SHELXL-97 (Sheldrick, 2008)' 
_computing_molecular_graphics     'SHELXTL(Bruker, 2008)' 
_computing_publication_material   'SHELXTL'
 
_refine_special_details 
; 
 Refinement of F^2^ against ALL reflections.  The weighted R-factor wR and 
 goodness of fit S are based on F^2^, conventional R-factors R are based 
 on F, with F set to zero for negative F^2^. The threshold expression of 
 F^2^ > 2sigma(F^2^) is used only for calculating R-factors(gt) etc. and is 
 not relevant to the choice of reflections for refinement.  R-factors based 
 on F^2^ are statistically about twice as large as those based on F, and R- 
 factors based on ALL data will be even larger. 
; 
 
_refine_ls_structure_factor_coef  Fsqd  
_refine_ls_matrix_type            full 
_refine_ls_weighting_scheme       calc  
_refine_ls_weighting_details 
 'calc w=1/[\s^2^(Fo^2^)+(0.0564P)^2^+0.0000P] where P=(Fo^2^+2Fc^2^)/3' 
_atom_sites_solution_primary      direct 
_atom_sites_solution_secondary    difmap 
_atom_sites_solution_hydrogens    geom 
_refine_ls_hydrogen_treatment     constr 
_refine_ls_extinction_method      none 
_refine_ls_extinction_coef        ? 
_refine_ls_number_reflns          19864 
_refine_ls_number_parameters      1459 
_refine_ls_number_restraints      2318 
_refine_ls_R_factor_all           0.0615 
_refine_ls_R_factor_gt            0.0462 
_refine_ls_wR_factor_ref          0.1170 
_refine_ls_wR_factor_gt           0.1111 
_refine_ls_goodness_of_fit_ref    0.986 
_refine_ls_restrained_S_all       0.952 
_refine_ls_shift/su_max           0.006 
_refine_ls_shift/su_mean          0.000 
 
loop_ 
 _atom_site_label 
 _atom_site_type_symbol 
 _atom_site_fract_x 
 _atom_site_fract_y 
 _atom_site_fract_z 
 _atom_site_U_iso_or_equiv 
 _atom_site_adp_type 
 _atom_site_occupancy 
 _atom_site_symmetry_multiplicity 
 _atom_site_calc_flag 
 _atom_site_refinement_flags 
 _atom_site_disorder_assembly 
 _atom_site_disorder_group 
La1 La 0.75577(3) 0.710960(19) 0.379474(11) 0.02126(9) Uani 1 1 d . . . 
La2 La 0.43945(3) 0.609853(18) 0.035130(11) 0.01874(8) Uani 1 1 d . . . 
La3 La 0.88392(3) 0.495299(19) 0.309281(11) 0.02031(9) Uani 1 1 d . . . 
La4 La 0.45372(3) 0.889851(19) 0.035845(11) 0.02124(9) Uani 1 1 d . . . 
La5 La 0.89245(3) 0.20530(2) 0.289498(11) 0.02521(9) Uani 1 1 d . . . 
La6 La 0.80157(3) 0.98628(2) 0.356652(11) 0.02364(9) Uani 1 1 d . . . 
C1 C -0.0943(5) 1.1821(3) -0.02041(19) 0.0242(12) Uani 1 1 d U . . 
C2 C 0.0026(5) 1.2176(3) -0.0321(2) 0.0281(13) Uani 1 1 d U . . 
H2A H -0.0103 1.2637 -0.0497 0.034 Uiso 1 1 calc R . . 
C3 C 0.1185(5) 1.1848(3) -0.0177(2) 0.0287(13) Uani 1 1 d U . . 
H3A H 0.1843 1.2083 -0.0261 0.034 Uiso 1 1 calc R . . 
C4 C 0.1368(5) 1.1165(3) 0.0094(2) 0.0278(13) Uani 1 1 d U . . 
C5 C 0.0385(6) 1.0829(4) 0.0217(2) 0.0332(14) Uani 1 1 d U . . 
H5A H 0.0501 1.0377 0.0400 0.040 Uiso 1 1 calc R . . 
C6 C -0.0778(6) 1.1157(4) 0.0071(2) 0.0315(13) Uani 1 1 d U . . 
H6A H -0.1442 1.0929 0.0159 0.038 Uiso 1 1 calc R . . 
C7 C -0.2159(6) 1.2143(4) -0.0398(2) 0.0283(13) Uani 1 1 d U . . 
C8 C 0.2642(6) 1.0791(4) 0.0238(2) 0.0280(13) Uani 1 1 d U . . 
C9 C 1.4345(5) -0.0800(3) 0.3489(2) 0.0274(13) Uani 1 1 d U . . 
C10 C 1.4296(6) -0.0206(4) 0.3160(2) 0.0311(13) Uani 1 1 d U . . 
H10A H 1.5019 -0.0041 0.3051 0.037 Uiso 1 1 calc R . . 
C11 C 1.3196(5) 0.0138(3) 0.2995(2) 0.0300(13) Uani 1 1 d U . . 
H11A H 1.3172 0.0540 0.2775 0.036 Uiso 1 1 calc R . . 
C12 C 1.2122(5) -0.0098(3) 0.3149(2) 0.0267(13) Uani 1 1 d U . . 
C13 C 1.2165(5) -0.0697(3) 0.3474(2) 0.0303(13) Uani 1 1 d U . . 
H13A H 1.1441 -0.0863 0.3579 0.036 Uiso 1 1 calc R . . 
C14 C 1.3264(5) -0.1046(3) 0.3641(2) 0.0299(13) Uani 1 1 d U . . 
H14A H 1.3289 -0.1452 0.3858 0.036 Uiso 1 1 calc R . . 
C15 C 1.5543(6) -0.1165(4) 0.3692(2) 0.0291(13) Uani 1 1 d U . . 
C16 C 1.0893(6) 0.0317(4) 0.2977(2) 0.0304(14) Uani 1 1 d U . . 
C17 C 1.3293(6) 0.3258(4) 0.3051(2) 0.0330(14) Uani 1 1 d U . . 
H17A H 1.3095 0.3771 0.2938 0.040 Uiso 1 1 calc R . . 
C18 C 1.4483(6) 0.2918(4) 0.3172(2) 0.0315(14) Uani 1 1 d U . . 
H18A H 1.5090 0.3194 0.3128 0.038 Uiso 1 1 calc R . . 
C19 C 1.4766(5) 0.2166(3) 0.3357(2) 0.0287(13) Uani 1 1 d U . . 
C20 C 1.3860(6) 0.1763(4) 0.3421(2) 0.0333(14) Uani 1 1 d U . . 
H20A H 1.4040 0.1263 0.3553 0.040 Uiso 1 1 calc R . . 
C21 C 1.2674(6) 0.2101(4) 0.3290(2) 0.0336(14) Uani 1 1 d U . . 
H21A H 1.2067 0.1824 0.3332 0.040 Uiso 1 1 calc R . . 
C22 C 1.2399(5) 0.2847(3) 0.30975(19) 0.0251(12) Uani 1 1 d U . . 
C23 C 1.6067(6) 0.1776(4) 0.3478(2) 0.0338(14) Uani 1 1 d U . . 
C24 C 1.1144(5) 0.3175(3) 0.29332(19) 0.0261(13) Uani 1 1 d U . . 
C25 C 0.2842(5) 0.8849(3) -0.1668(2) 0.0291(13) Uani 1 1 d U . . 
H25A H 0.2542 0.8423 -0.1706 0.035 Uiso 1 1 calc R . . 
C26 C 0.3190(5) 0.8955(3) -0.1247(2) 0.0293(13) Uani 1 1 d U . . 
H26A H 0.3102 0.8605 -0.1002 0.035 Uiso 1 1 calc R . . 
C27 C 0.3669(5) 0.9579(3) -0.1189(2) 0.0267(13) Uani 1 1 d U . . 
C28 C 0.3782(5) 1.0096(3) -0.1556(2) 0.0295(13) Uani 1 1 d U . . 
H28A H 0.4107 1.0513 -0.1524 0.035 Uiso 1 1 calc R . . 
C29 C 0.3417(5) 0.9996(3) -0.1971(2) 0.0302(13) Uani 1 1 d U . . 
H29A H 0.3492 1.0350 -0.2214 0.036 Uiso 1 1 calc R . . 
C30 C 0.2942(5) 0.9375(3) -0.20267(19) 0.0256(13) Uani 1 1 d U . . 
C31 C 0.4069(5) 0.9684(4) -0.0738(2) 0.0285(13) Uani 1 1 d U . . 
C32 C 0.2496(6) 0.9287(4) -0.2471(2) 0.0294(13) Uani 1 1 d U . . 
C33 C 0.9758(5) 0.7975(3) 0.5528(2) 0.0303(13) Uani 1 1 d U . . 
H33A H 0.9620 0.7657 0.5785 0.036 Uiso 1 1 calc R . . 
C34 C 0.9410(6) 0.7849(4) 0.5112(2) 0.0310(13) Uani 1 1 d U . . 
H34A H 0.9049 0.7444 0.5090 0.037 Uiso 1 1 calc R . . 
C35 C 0.9603(5) 0.8332(3) 0.47270(19) 0.0238(12) Uani 1 1 d U . . 
C36 C 1.0180(5) 0.8911(3) 0.4765(2) 0.0289(13) Uani 1 1 d U . . 
H36A H 1.0335 0.9225 0.4508 0.035 Uiso 1 1 calc R . . 
C37 C 1.0528(5) 0.9031(3) 0.5174(2) 0.0306(13) Uani 1 1 d U . . 
H37A H 1.0915 0.9425 0.5192 0.037 Uiso 1 1 calc R . . 
C38 C 1.0310(5) 0.8571(3) 0.5561(2) 0.0280(13) Uani 1 1 d U . . 
C39 C 0.9132(5) 0.8251(3) 0.4291(2) 0.0269(13) Uani 1 1 d U . . 
C40 C 1.0674(6) 0.8733(4) 0.6008(2) 0.0325(14) Uani 1 1 d U . . 
C41 C 1.3558(6) 0.6730(4) 0.3516(2) 0.0360(14) Uani 1 1 d U . . 
H41A H 1.3812 0.7167 0.3573 0.043 Uiso 1 1 calc R . . 
C42 C 1.2324(6) 0.6833(4) 0.3437(2) 0.0359(14) Uani 1 1 d U . . 
H42A H 1.1759 0.7334 0.3440 0.043 Uiso 1 1 calc R . . 
C43 C 1.1941(5) 0.6190(3) 0.3353(2) 0.0273(13) Uani 1 1 d U . . 
C44 C 1.2807(6) 0.5454(4) 0.3341(2) 0.0337(14) Uani 1 1 d U . . 
H44A H 1.2561 0.5017 0.3281 0.040 Uiso 1 1 calc R . . 
C45 C 1.4032(6) 0.5360(4) 0.3416(2) 0.0364(15) Uani 1 1 d U . . 
H45A H 1.4610 0.4862 0.3402 0.044 Uiso 1 1 calc R . . 
C46 C 1.4400(5) 0.6005(4) 0.3512(2) 0.0301(13) Uani 1 1 d U . . 
C47 C 1.5723(6) 0.5909(4) 0.3612(2) 0.0320(14) Uani 1 1 d U . . 
C48 C 1.0616(6) 0.6279(4) 0.3266(2) 0.0297(13) Uani 1 1 d U . . 
C49 C 0.6275(6) 0.3380(4) 0.1400(2) 0.0314(14) Uani 1 1 d U . . 
H49A H 0.5995 0.2978 0.1306 0.038 Uiso 1 1 calc R . . 
C50 C 0.6360(5) 0.3998(3) 0.11014(19) 0.0258(12) Uani 1 1 d U . . 
C51 C 0.6800(5) 0.4593(3) 0.1240(2) 0.0308(13) Uani 1 1 d U . . 
H51A H 0.6852 0.5017 0.1043 0.037 Uiso 1 1 calc R . . 
C52 C 0.6595(5) 0.3347(3) 0.18330(19) 0.0282(13) Uani 1 1 d U . . 
H52A H 0.6512 0.2932 0.2033 0.034 Uiso 1 1 calc R . . 
C53 C 0.6015(5) 0.4026(3) 0.0628(2) 0.0257(13) Uani 1 1 d U . . 
C54 C 0.7446(5) 0.3895(3) 0.2436(2) 0.0259(13) Uani 1 1 d U . . 
C55 C 0.7162(6) 0.4550(3) 0.1674(2) 0.0307(13) Uani 1 1 d U . . 
H55A H 0.7485 0.4937 0.1762 0.037 Uiso 1 1 calc R . . 
C56 C 0.7047(5) 0.3939(3) 0.1974(2) 0.0271(13) Uani 1 1 d U . . 
C57 C 0.5866(5) 0.7194(3) 0.09739(19) 0.0232(12) Uani 1 1 d U . . 
C58 C 0.6267(5) 0.7140(3) 0.14389(19) 0.0226(12) Uani 1 1 d U . . 
C59 C 0.6088(5) 0.6548(3) 0.1746(2) 0.0286(13) Uani 1 1 d U . . 
H59A H 0.5733 0.6176 0.1658 0.034 Uiso 1 1 calc R . . 
C60 C 0.6424(5) 0.6493(3) 0.2182(2) 0.0297(13) Uani 1 1 d U . . 
H60A H 0.6322 0.6079 0.2381 0.036 Uiso 1 1 calc R . . 
C61 C 0.6916(5) 0.7063(3) 0.23220(19) 0.0248(12) Uani 1 1 d U . . 
C62 C 0.7086(5) 0.7670(3) 0.2016(2) 0.0299(13) Uani 1 1 d U . . 
H62A H 0.7407 0.8056 0.2107 0.036 Uiso 1 1 calc R . . 
C63 C 0.6775(6) 0.7695(3) 0.1576(2) 0.0294(13) Uani 1 1 d U . . 
H63A H 0.6911 0.8093 0.1370 0.035 Uiso 1 1 calc R . . 
C64 C 0.7256(5) 0.7031(3) 0.2796(2) 0.0255(13) Uani 1 1 d U . . 
C65 C 0.9828(6) 0.4358(4) 0.4812(2) 0.0367(15) Uani 1 1 d U . . 
H65A H 0.9710 0.3921 0.4686 0.044 Uiso 1 1 calc R . . 
C66 C 0.9831(6) 0.5696(4) 0.4754(2) 0.0359(15) Uani 1 1 d U . . 
H66A H 0.9716 0.6169 0.4590 0.043 Uiso 1 1 calc R . . 
C67 C 0.9661(6) 0.5055(3) 0.4560(2) 0.0287(13) Uani 1 1 d U . . 
C68 C 0.9324(6) 0.5098(4) 0.4085(2) 0.0298(14) Uani 1 1 d U . . 
C69 C 0.6240(9) 0.5237(5) 0.5377(3) 0.081(2) Uani 1 1 d U . . 
H69A H 0.6152 0.4979 0.5111 0.122 Uiso 1 1 calc R . . 
H69B H 0.5476 0.5316 0.5604 0.122 Uiso 1 1 calc R . . 
H69C H 0.6952 0.4918 0.5509 0.122 Uiso 1 1 calc R . . 
C70 C 0.6599(8) 0.6468(5) 0.5593(3) 0.075(2) Uani 1 1 d U . . 
H70A H 0.6707 0.6955 0.5459 0.112 Uiso 1 1 calc R . . 
H70B H 0.7335 0.6196 0.5728 0.112 Uiso 1 1 calc R . . 
H70C H 0.5853 0.6572 0.5830 0.112 Uiso 1 1 calc R . . 
C71 C 0.6562(7) 0.6213(4) 0.4796(3) 0.0461(16) Uani 1 1 d U . . 
C72 C 0.6086(8) 0.8699(5) 0.5352(3) 0.067(2) Uani 1 1 d U . . 
H72A H 0.5910 0.8391 0.5126 0.100 Uiso 1 1 calc R . . 
H72B H 0.5333 0.8891 0.5579 0.100 Uiso 1 1 calc R . . 
H72C H 0.6760 0.8379 0.5503 0.100 Uiso 1 1 calc R . . 
C73 C 0.6789(8) 0.9863(5) 0.5410(3) 0.064(2) Uani 1 1 d U . . 
H73A H 0.7030 1.0281 0.5229 0.095 Uiso 1 1 calc R . . 
H73B H 0.7487 0.9565 0.5557 0.095 Uiso 1 1 calc R . . 
H73C H 0.6062 1.0080 0.5644 0.095 Uiso 1 1 calc R . . 
C74 C 0.6563(7) 0.9403(5) 0.4668(3) 0.0497(17) Uani 1 1 d U . . 
C75 C 0.9854(9) 0.2404(6) 0.1077(3) 0.087(3) Uani 1 1 d U . . 
H75A H 0.9608 0.1985 0.1255 0.130 Uiso 1 1 calc R . . 
H75B H 1.0584 0.2188 0.0844 0.130 Uiso 1 1 calc R . . 
H75C H 0.9161 0.2707 0.0929 0.130 Uiso 1 1 calc R . . 
C76 C 1.0572(9) 0.3552(5) 0.1168(3) 0.088(3) Uani 1 1 d U . . 
H76A H 1.0751 0.3836 0.1404 0.133 Uiso 1 1 calc R . . 
H76B H 0.9909 0.3892 0.1020 0.133 Uiso 1 1 calc R . . 
H76C H 1.1329 0.3368 0.0941 0.133 Uiso 1 1 calc R . . 
C77 C 1.0077(7) 0.2785(5) 0.1826(3) 0.0504(17) Uani 1 1 d U . . 
C78 C 0.9663(5) 0.4357(3) -0.0100(2) 0.0291(13) Uani 1 1 d U . . 
H78A H 0.9438 0.3915 -0.0166 0.035 Uiso 1 1 calc R . . 
C79 C 0.9121(5) 0.5725(3) 0.0026(2) 0.0292(13) Uani 1 1 d U . . 
H79A H 0.8528 0.6218 0.0047 0.035 Uiso 1 1 calc R . . 
C80 C 0.7449(5) 0.5155(3) -0.0175(2) 0.0261(13) Uani 1 1 d U . . 
C81 C 0.3470(9) 0.8736(6) 0.2176(3) 0.093(3) Uani 1 1 d U . . 
H81A H 0.3708 0.9149 0.1989 0.139 Uiso 1 1 calc R . . 
H81B H 0.4173 0.8442 0.2322 0.139 Uiso 1 1 calc R . . 
H81C H 0.2748 0.8958 0.2410 0.139 Uiso 1 1 calc R . . 
C82 C 0.2765(9) 0.7581(6) 0.2132(3) 0.088(3) Uani 1 1 d U . . 
H82A H 0.2578 0.7275 0.1908 0.132 Uiso 1 1 calc R . . 
H82B H 0.2018 0.7774 0.2361 0.132 Uiso 1 1 calc R . . 
H82C H 0.3442 0.7257 0.2280 0.132 Uiso 1 1 calc R . . 
C83 C 0.3229(7) 0.8320(5) 0.1458(3) 0.0574(18) Uani 1 1 d U . . 
H83A H 0.3000 0.7961 0.1297 0.069 Uiso 1 1 calc R . . 
C84 C 0.3334(8) 0.5350(5) 0.2140(3) 0.066(2) Uani 1 1 d U . . 
H84A H 0.3465 0.5840 0.2020 0.099 Uiso 1 1 calc R . . 
H84B H 0.4055 0.5055 0.2275 0.099 Uiso 1 1 calc R . . 
H84C H 0.2578 0.5449 0.2372 0.099 Uiso 1 1 calc R . . 
C85 C 0.2952(7) 0.4147(4) 0.1870(3) 0.061(2) Uani 1 1 d U . . 
H85A H 0.2863 0.3923 0.1591 0.092 Uiso 1 1 calc R . . 
H85B H 0.2182 0.4213 0.2093 0.092 Uiso 1 1 calc R . . 
H85C H 0.3654 0.3803 0.1996 0.092 Uiso 1 1 calc R . . 
C86 C 0.3361(6) 0.5161(4) 0.1327(2) 0.0354(15) Uani 1 1 d U . . 
H86A H 0.3312 0.4837 0.1097 0.042 Uiso 1 1 calc R . . 
C87 C 0.9872(8) 0.5726(5) 0.1300(3) 0.066(2) Uani 1 1 d U . . 
H87A H 0.9698 0.5247 0.1421 0.099 Uiso 1 1 calc R . . 
H87B H 1.0631 0.5605 0.1069 0.099 Uiso 1 1 calc R . . 
H87C H 0.9167 0.6038 0.1162 0.099 Uiso 1 1 calc R . . 
C88 C 1.0333(8) 0.6897(5) 0.1552(3) 0.062(2) Uani 1 1 d U . . 
H88A H 1.0456 0.7121 0.1825 0.093 Uiso 1 1 calc R . . 
H88B H 0.9636 0.7251 0.1428 0.093 Uiso 1 1 calc R . . 
H88C H 1.1096 0.6810 0.1324 0.093 Uiso 1 1 calc R . . 
C89 C 0.9888(6) 0.5914(4) 0.2103(2) 0.0360(15) Uani 1 1 d U . . 
H89A H 0.9953 0.6242 0.2328 0.043 Uiso 1 1 calc R . . 
C90 C 0.8773(5) 0.5077(3) -0.00792(19) 0.0247(13) Uani 1 1 d U . . 
C91 C 0.0480(8) 1.0181(5) 0.1571(3) 0.079(3) Uani 1 1 d U . . 
H91A H 0.0593 1.0336 0.1866 0.119 Uiso 1 1 calc R . . 
H91B H -0.0152 1.0593 0.1449 0.119 Uiso 1 1 calc R . . 
H91C H 0.1274 1.0080 0.1359 0.119 Uiso 1 1 calc R . . 
C92 C -0.0156(8) 0.9157(5) 0.1231(3) 0.067(2) Uani 1 1 d U . . 
H92A H -0.0415 0.8692 0.1324 0.101 Uiso 1 1 calc R . . 
H92B H 0.0610 0.9022 0.1004 0.101 Uiso 1 1 calc R . . 
H92C H -0.0819 0.9530 0.1099 0.101 Uiso 1 1 calc R . . 
C93 C -0.0152(7) 0.9178(5) 0.2048(3) 0.057(2) Uani 1 1 d U . . 
H93A H -0.0033 0.9423 0.2302 0.068 Uiso 1 1 calc R . . 
C94 C 0.3625(9) 0.7979(6) 0.5065(3) 0.092(3) Uani 1 1 d U . . 
H94A H 0.3716 0.8147 0.5360 0.138 Uiso 1 1 calc R . . 
H94B H 0.2981 0.8378 0.4939 0.138 Uiso 1 1 calc R . . 
H94C H 0.4423 0.7892 0.4856 0.138 Uiso 1 1 calc R . . 
C95 C 0.3102(9) 0.6948(6) 0.4712(3) 0.086(3) Uani 1 1 d U . . 
H95A H 0.2847 0.6477 0.4785 0.129 Uiso 1 1 calc R . . 
H95B H 0.3893 0.6829 0.4497 0.129 Uiso 1 1 calc R . . 
H95C H 0.2457 0.7325 0.4573 0.129 Uiso 1 1 calc R . . 
C96 C 0.3023(9) 0.6962(6) 0.5536(3) 0.074(2) Uani 1 1 d U . . 
H96A H 0.3121 0.7207 0.5794 0.089 Uiso 1 1 calc R . . 
C97 C 0.6426(8) 0.8006(5) 0.8028(3) 0.062(2) Uani 1 1 d U . . 
H97A H 0.6131 0.7550 0.8105 0.093 Uiso 1 1 calc R . . 
H97B H 0.7211 0.7865 0.7810 0.093 Uiso 1 1 calc R . . 
H97C H 0.5798 0.8399 0.7891 0.093 Uiso 1 1 calc R . . 
C98 C 0.7064(8) 0.9004(5) 0.8382(3) 0.065(2) Uani 1 1 d U . . 
H98A H 0.7162 0.9166 0.8678 0.098 Uiso 1 1 calc R . . 
H98B H 0.6450 0.9418 0.8252 0.098 Uiso 1 1 calc R . . 
H98C H 0.7869 0.8893 0.8176 0.098 Uiso 1 1 calc R . . 
C99 C 0.6366(6) 0.7987(4) 0.8857(2) 0.0440(16) Uani 1 1 d U . . 
H99A H 0.6497 0.8221 0.9113 0.053 Uiso 1 1 calc R . . 
N1 N 0.6453(6) 0.5989(4) 0.5237(2) 0.0557(16) Uani 1 1 d U . . 
N2 N 0.6478(5) 0.9367(3) 0.51172(18) 0.0415(13) Uani 1 1 d U . . 
N3 N 1.0165(6) 0.2893(4) 0.1375(2) 0.0519(15) Uani 1 1 d U . . 
N4 N 0.0078(5) 0.9496(4) 0.1630(2) 0.0463(15) Uani 1 1 d . . . 
N5 N 0.3157(5) 0.8242(4) 0.1897(2) 0.0474(14) Uani 1 1 d U . . 
N6 N 0.3186(5) 0.4904(3) 0.17630(18) 0.0420(14) Uani 1 1 d . . . 
N7 N 1.0051(5) 0.6157(3) 0.16724(18) 0.0405(14) Uani 1 1 d . . . 
N8 N 0.3261(6) 0.7265(4) 0.5126(2) 0.0585(16) Uani 1 1 d U . . 
N9 N 0.6634(5) 0.8314(3) 0.8444(2) 0.0441(14) Uani 1 1 d U . . 
O1 O -0.2799(4) 1.1670(3) -0.04201(16) 0.0454(12) Uani 1 1 d . . . 
O2 O -0.2442(4) 1.2823(2) -0.05483(14) 0.0337(10) Uani 1 1 d . . . 
O3 O 0.3452(4) 1.1160(3) 0.01491(14) 0.0377(11) Uani 1 1 d . . . 
O4 O 0.2792(4) 1.0151(3) 0.04455(16) 0.0405(11) Uani 1 1 d . . . 
O5 O 1.5616(4) -0.1771(2) 0.39330(15) 0.0374(11) Uani 1 1 d . . . 
O6 O 1.6391(4) -0.0827(3) 0.36089(17) 0.0519(14) Uani 1 1 d . . . 
O7 O 0.9955(4) 0.0060(3) 0.30971(16) 0.0462(13) Uani 1 1 d . . . 
O8 O 1.0861(4) 0.0909(3) 0.27195(16) 0.0429(12) Uani 1 1 d . . . 
O9 O 1.6267(4) 0.1093(3) 0.36403(16) 0.0448(12) Uani 1 1 d . . . 
O10 O 1.6877(4) 0.2163(3) 0.34075(14) 0.0410(11) Uani 1 1 d . . . 
O11 O 1.0791(4) 0.3899(2) 0.28575(14) 0.0353(10) Uani 1 1 d . . . 
O12 O 1.0558(4) 0.2718(3) 0.28524(15) 0.0384(11) Uani 1 1 d . . . 
O14 O 0.2577(4) 0.9797(3) -0.27855(14) 0.0435(12) Uani 1 1 d . . . 
O15 O 0.4494(4) 1.0251(3) -0.07083(16) 0.0445(12) Uani 1 1 d . . . 
O16 O 0.3938(4) 0.9196(3) -0.04197(14) 0.0415(12) Uani 1 1 d . . . 
O17 O 1.1149(4) 0.9285(3) 0.60094(15) 0.0461(12) Uani 1 1 d . . . 
O18 O 1.0468(4) 0.8299(3) 0.63467(14) 0.0443(12) Uani 1 1 d . . . 
O19 O 0.9282(4) 0.8731(2) 0.39710(14) 0.0386(11) Uani 1 1 d . . . 
O20 O 0.8590(4) 0.7728(3) 0.42732(14) 0.0393(11) Uani 1 1 d . . . 
O21 O 1.6559(4) 0.5267(3) 0.35024(16) 0.0432(12) Uani 1 1 d . . . 
O22 O 1.5889(4) 0.6458(3) 0.38093(15) 0.0367(11) Uani 1 1 d . . . 
O23 O 0.9778(4) 0.6912(2) 0.33605(15) 0.0347(10) Uani 1 1 d . . . 
O24 O 1.0455(4) 0.5688(2) 0.30899(14) 0.0344(10) Uani 1 1 d . . . 
O25 O 0.6269(4) 0.3402(2) 0.04174(14) 0.0367(11) Uani 1 1 d . . . 
O26 O 0.5481(3) 0.4682(2) 0.04585(13) 0.0266(9) Uani 1 1 d . . . 
O27 O 0.7455(4) 0.3290(2) 0.26805(14) 0.0363(11) Uani 1 1 d . . . 
O28 O 0.7760(4) 0.4462(2) 0.25597(14) 0.0389(11) Uani 1 1 d . . . 
O29 O 0.5446(4) 0.6664(2) 0.08635(14) 0.0357(11) Uani 1 1 d . . . 
O30 O 0.5979(4) 0.7773(2) 0.07211(14) 0.0336(10) Uani 1 1 d . . . 
O31 O 0.7103(4) 0.7650(2) 0.29962(14) 0.0409(12) Uani 1 1 d . . . 
O32 O 0.7691(4) 0.6370(2) 0.29799(13) 0.0278(9) Uani 1 1 d . . . 
O33 O 0.9645(5) 0.4490(3) 0.38505(15) 0.0459(13) Uani 1 1 d . . . 
O34 O 0.8693(4) 0.5746(2) 0.39366(13) 0.0333(10) Uani 1 1 d . . . 
O35 O 0.6739(4) 0.6842(3) 0.46543(14) 0.0427(12) Uani 1 1 d . . . 
O36 O 0.6917(5) 0.9909(3) 0.44349(17) 0.0591(15) Uani 1 1 d . . . 
O37 O 0.9703(5) 0.2241(3) 0.20279(16) 0.0524(13) Uani 1 1 d . . . 
O38 O 0.6624(4) 0.5785(2) -0.00734(15) 0.0342(10) Uani 1 1 d . . . 
O39 O 0.3599(5) 0.8866(3) 0.12310(17) 0.0575(14) Uani 1 1 d U . . 
O40 O 0.3580(4) 0.5781(3) 0.12006(14) 0.0373(11) Uani 1 1 d . . . 
O41 O 0.9660(4) 0.5301(3) 0.22387(14) 0.0402(11) Uani 1 1 d . . . 
O43 O 0.7295(4) 0.4584(2) -0.03544(14) 0.0309(10) Uani 1 1 d . . . 
O44 O -0.0515(6) 0.8574(3) 0.21223(18) 0.0704(17) Uani 1 1 d . . . 
O45 O 0.2663(7) 0.6349(4) 0.5597(2) 0.087(2) Uani 1 1 d . . . 
O46 O 0.2083(4) 0.8717(3) -0.25064(15) 0.0450(12) Uani 1 1 d . . . 
O47 O 0.5970(5) 0.7420(3) 0.89342(17) 0.0595(15) Uani 1 1 d . . . 
O1W O 0.8961(5) 0.8689(3) 0.30841(16) 0.0770(19) Uani 1 1 d . . . 
H1WA H 0.9770 0.8556 0.3053 0.092 Uiso 1 1 d R . . 
H1WB H 0.8742 0.8765 0.2817 0.092 Uiso 1 1 d R . . 
O2W O 0.8151(4) 0.3733(3) 0.34749(13) 0.0418(12) Uani 1 1 d . . . 
H2WA H 0.7343 0.3879 0.3549 0.050 Uiso 1 1 d R . . 
H2WB H 0.8450 0.3630 0.3727 0.050 Uiso 1 1 d R . . 
O3W O 0.5230(4) 0.7454(2) -0.00884(14) 0.0410(11) Uani 1 1 d . . . 
H3WA H 0.5885 0.7058 -0.0120 0.049 Uiso 1 1 d R . . 
H3WB H 0.5113 0.7630 -0.0359 0.049 Uiso 1 1 d R . . 
 
loop_ 
 _atom_site_aniso_label 
 _atom_site_aniso_U_11 
 _atom_site_aniso_U_22 
 _atom_site_aniso_U_33 
 _atom_site_aniso_U_23 
 _atom_site_aniso_U_13 
 _atom_site_aniso_U_12 
La1 0.02146(18) 0.02530(19) 0.01909(17) -0.00244(13) -0.01006(14) -0.00540(14) 
La2 0.01892(17) 0.02015(17) 0.01896(17) -0.00146(13) -0.00810(13) -0.00515(13) 
La3 0.02312(18) 0.02034(18) 0.01994(17) 0.00115(13) -0.01014(14) -0.00634(14) 
La4 0.02364(18) 0.02447(18) 0.02006(17) 0.00701(13) -0.01159(14) -0.01040(14) 
La5 0.02570(19) 0.0342(2) 0.02029(18) 0.00887(14) -0.01187(14) -0.01262(16) 
La6 0.02612(19) 0.0273(2) 0.02058(18) 0.00647(14) -0.01090(14) -0.00941(15) 
C1 0.024(2) 0.024(3) 0.024(3) -0.001(2) -0.003(2) -0.007(2) 
C2 0.030(3) 0.027(3) 0.030(3) 0.006(2) -0.008(2) -0.011(2) 
C3 0.025(3) 0.032(3) 0.033(3) 0.002(2) -0.005(2) -0.014(2) 
C4 0.029(3) 0.029(3) 0.027(3) 0.000(2) -0.009(2) -0.008(2) 
C5 0.033(3) 0.029(3) 0.039(3) 0.010(2) -0.009(2) -0.010(2) 
C6 0.028(3) 0.035(3) 0.036(3) 0.008(2) -0.008(2) -0.015(2) 
C7 0.027(3) 0.033(3) 0.024(3) 0.001(2) -0.004(2) -0.007(2) 
C8 0.027(3) 0.032(3) 0.023(3) -0.004(2) -0.006(2) -0.003(2) 
C9 0.028(3) 0.026(3) 0.029(3) -0.003(2) -0.005(2) -0.009(2) 
C10 0.028(3) 0.035(3) 0.033(3) 0.002(2) -0.003(2) -0.014(2) 
C11 0.031(3) 0.029(3) 0.032(3) 0.007(2) -0.009(2) -0.011(2) 
C12 0.027(3) 0.026(3) 0.027(3) -0.004(2) -0.005(2) -0.005(2) 
C13 0.025(3) 0.030(3) 0.037(3) 0.004(2) -0.005(2) -0.011(2) 
C14 0.031(3) 0.027(3) 0.032(3) 0.006(2) -0.004(2) -0.009(2) 
C15 0.028(3) 0.031(3) 0.030(3) -0.001(2) -0.007(2) -0.009(2) 
C16 0.028(3) 0.034(3) 0.026(3) -0.007(2) -0.008(2) -0.001(2) 
C17 0.036(3) 0.027(3) 0.037(3) 0.004(2) -0.009(2) -0.010(2) 
C18 0.030(3) 0.032(3) 0.035(3) 0.004(2) -0.006(2) -0.014(2) 
C19 0.030(3) 0.030(3) 0.025(3) 0.002(2) -0.008(2) -0.006(2) 
C20 0.035(3) 0.028(3) 0.038(3) 0.007(2) -0.011(2) -0.009(2) 
C21 0.033(3) 0.030(3) 0.040(3) 0.004(2) -0.008(2) -0.012(2) 
C22 0.026(3) 0.025(3) 0.025(3) -0.002(2) -0.005(2) -0.008(2) 
C23 0.034(3) 0.036(3) 0.028(3) 0.000(2) -0.007(2) -0.005(2) 
C24 0.028(3) 0.027(3) 0.023(3) 0.000(2) -0.006(2) -0.004(2) 
C25 0.034(3) 0.028(3) 0.031(3) 0.001(2) -0.011(2) -0.014(2) 
C26 0.033(3) 0.029(3) 0.029(3) 0.008(2) -0.012(2) -0.012(2) 
C27 0.027(3) 0.029(3) 0.026(3) 0.001(2) -0.012(2) -0.009(2) 
C28 0.035(3) 0.026(3) 0.031(3) 0.000(2) -0.009(2) -0.013(2) 
C29 0.037(3) 0.031(3) 0.025(3) 0.006(2) -0.009(2) -0.013(2) 
C30 0.025(3) 0.030(3) 0.024(3) 0.002(2) -0.010(2) -0.007(2) 
C31 0.026(3) 0.033(3) 0.026(3) -0.003(2) -0.009(2) -0.004(2) 
C32 0.029(3) 0.034(3) 0.026(3) -0.001(2) -0.011(2) -0.007(2) 
C33 0.036(3) 0.031(3) 0.026(3) 0.003(2) -0.008(2) -0.013(2) 
C34 0.038(3) 0.030(3) 0.031(3) 0.000(2) -0.013(2) -0.015(2) 
C35 0.026(2) 0.025(3) 0.022(2) -0.002(2) -0.009(2) -0.005(2) 
C36 0.036(3) 0.030(3) 0.025(3) 0.003(2) -0.012(2) -0.013(2) 
C37 0.036(3) 0.031(3) 0.031(3) -0.002(2) -0.011(2) -0.016(2) 
C38 0.029(3) 0.031(3) 0.025(3) -0.003(2) -0.009(2) -0.008(2) 
C39 0.028(3) 0.027(3) 0.025(3) 0.000(2) -0.007(2) -0.004(2) 
C40 0.031(3) 0.038(3) 0.030(3) 0.000(2) -0.011(2) -0.010(2) 
C41 0.036(3) 0.032(3) 0.045(3) -0.004(2) -0.011(2) -0.015(2) 
C42 0.034(3) 0.033(3) 0.043(3) -0.003(2) -0.010(2) -0.011(2) 
C43 0.025(3) 0.031(3) 0.029(3) -0.003(2) -0.007(2) -0.011(2) 
C44 0.034(3) 0.033(3) 0.040(3) -0.002(2) -0.013(2) -0.015(2) 
C45 0.034(3) 0.034(3) 0.042(3) -0.001(2) -0.010(2) -0.008(2) 
C46 0.027(3) 0.034(3) 0.031(3) -0.004(2) -0.005(2) -0.011(2) 
C47 0.029(3) 0.035(3) 0.032(3) 0.000(2) -0.002(2) -0.012(2) 
C48 0.029(3) 0.035(3) 0.029(3) -0.001(2) -0.007(2) -0.014(2) 
C49 0.039(3) 0.030(3) 0.033(3) 0.000(2) -0.015(2) -0.016(2) 
C50 0.029(3) 0.024(3) 0.025(3) 0.000(2) -0.009(2) -0.007(2) 
C51 0.039(3) 0.027(3) 0.031(3) 0.006(2) -0.010(2) -0.013(2) 
C52 0.037(3) 0.027(3) 0.026(3) 0.004(2) -0.011(2) -0.015(2) 
C53 0.024(2) 0.030(3) 0.028(3) 0.001(2) -0.008(2) -0.012(2) 
C54 0.026(3) 0.023(3) 0.028(3) -0.001(2) -0.010(2) -0.003(2) 
C55 0.038(3) 0.029(3) 0.032(3) 0.001(2) -0.015(2) -0.014(2) 
C56 0.030(3) 0.027(3) 0.026(3) -0.002(2) -0.011(2) -0.006(2) 
C57 0.025(2) 0.025(3) 0.020(2) 0.003(2) -0.008(2) -0.006(2) 
C58 0.024(2) 0.024(3) 0.023(2) 0.001(2) -0.011(2) -0.007(2) 
C59 0.032(3) 0.028(3) 0.030(3) 0.001(2) -0.013(2) -0.012(2) 
C60 0.035(3) 0.030(3) 0.028(3) 0.004(2) -0.009(2) -0.014(2) 
C61 0.028(3) 0.025(3) 0.022(2) -0.001(2) -0.010(2) -0.006(2) 
C62 0.037(3) 0.029(3) 0.029(3) 0.000(2) -0.012(2) -0.014(2) 
C63 0.040(3) 0.026(3) 0.026(3) 0.005(2) -0.013(2) -0.012(2) 
C64 0.028(3) 0.023(3) 0.027(3) 0.001(2) -0.010(2) -0.006(2) 
C65 0.049(3) 0.033(3) 0.033(3) 0.001(2) -0.023(3) -0.010(3) 
C66 0.046(3) 0.031(3) 0.034(3) 0.008(2) -0.021(3) -0.010(2) 
C67 0.035(3) 0.025(3) 0.027(3) 0.000(2) -0.012(2) -0.006(2) 
C68 0.031(3) 0.030(3) 0.031(3) 0.003(2) -0.013(2) -0.008(2) 
C69 0.092(4) 0.071(4) 0.080(4) 0.021(3) -0.006(4) -0.030(4) 
C70 0.089(4) 0.078(4) 0.054(3) -0.001(3) -0.011(3) -0.018(3) 
C71 0.045(3) 0.047(3) 0.046(3) 0.006(2) -0.006(3) -0.013(3) 
C72 0.068(4) 0.065(4) 0.067(4) 0.007(3) -0.004(3) -0.024(3) 
C73 0.065(4) 0.064(4) 0.063(4) -0.011(3) -0.010(3) -0.018(3) 
C74 0.043(3) 0.053(3) 0.041(3) -0.001(3) -0.002(3) 0.002(3) 
C75 0.101(5) 0.088(4) 0.068(4) -0.011(3) -0.014(4) -0.018(4) 
C76 0.089(4) 0.082(4) 0.088(4) 0.027(3) -0.003(4) -0.027(3) 
C77 0.046(3) 0.051(3) 0.047(3) 0.006(3) -0.003(3) -0.006(3) 
C78 0.031(3) 0.025(3) 0.035(3) -0.005(2) -0.007(2) -0.012(2) 
C79 0.027(3) 0.025(3) 0.034(3) -0.004(2) -0.007(2) -0.003(2) 
C80 0.027(3) 0.028(3) 0.028(3) 0.001(2) -0.005(2) -0.014(2) 
C81 0.103(5) 0.097(4) 0.083(4) -0.021(3) -0.018(4) -0.029(4) 
C82 0.086(4) 0.084(4) 0.090(4) 0.022(3) -0.004(4) -0.028(3) 
C83 0.054(3) 0.061(3) 0.052(3) 0.003(3) -0.007(3) -0.010(3) 
C84 0.075(4) 0.069(4) 0.051(4) 0.002(3) -0.007(3) -0.018(3) 
C85 0.064(4) 0.055(4) 0.060(4) 0.013(3) 0.002(3) -0.020(3) 
C86 0.034(3) 0.040(3) 0.030(3) 0.001(2) 0.000(2) -0.011(3) 
C87 0.073(4) 0.073(4) 0.051(4) -0.002(3) -0.007(3) -0.022(3) 
C88 0.065(4) 0.060(4) 0.058(4) 0.012(3) -0.002(3) -0.020(3) 
C89 0.040(3) 0.036(3) 0.031(3) -0.002(2) -0.003(2) -0.009(2) 
C90 0.023(3) 0.026(3) 0.028(3) 0.000(2) -0.004(2) -0.011(2) 
C91 0.073(4) 0.077(4) 0.090(5) -0.006(4) -0.004(4) -0.031(4) 
C92 0.071(4) 0.072(4) 0.058(4) -0.002(3) -0.014(3) -0.017(3) 
C93 0.054(4) 0.058(4) 0.056(4) -0.011(3) -0.008(3) -0.009(3) 
C94 0.083(4) 0.080(4) 0.109(5) 0.005(3) 0.004(4) -0.032(4) 
C95 0.092(5) 0.092(4) 0.070(4) 0.000(3) -0.015(4) -0.017(4) 
C96 0.075(4) 0.078(4) 0.066(3) 0.006(3) -0.007(3) -0.018(4) 
C97 0.074(4) 0.063(4) 0.049(3) -0.002(3) -0.013(3) -0.017(3) 
C98 0.067(4) 0.066(4) 0.066(4) -0.001(3) -0.001(3) -0.030(3) 
C99 0.042(3) 0.045(3) 0.043(3) -0.007(2) -0.005(3) -0.009(3) 
N1 0.065(4) 0.055(4) 0.044(3) 0.008(3) -0.004(3) -0.016(3) 
N2 0.037(3) 0.048(3) 0.032(3) -0.002(2) 0.001(2) -0.004(3) 
N3 0.050(4) 0.051(4) 0.041(3) 0.009(3) 0.003(3) -0.002(3) 
N4 0.042(3) 0.048(4) 0.045(4) -0.011(3) -0.001(3) -0.009(3) 
N5 0.048(4) 0.050(4) 0.036(3) 0.004(2) -0.003(3) -0.004(3) 
N6 0.046(3) 0.046(4) 0.031(3) 0.004(3) 0.002(3) -0.013(3) 
N7 0.044(3) 0.043(4) 0.033(3) 0.009(3) -0.001(3) -0.014(3) 
N8 0.049(4) 0.060(4) 0.059(4) -0.002(3) 0.006(3) -0.013(3) 
N9 0.043(3) 0.047(4) 0.041(3) -0.005(3) -0.002(3) -0.013(3) 
O1 0.030(2) 0.054(3) 0.062(3) 0.014(2) -0.017(2) -0.023(2) 
O2 0.030(2) 0.028(2) 0.035(2) 0.0016(19) 0.0000(19) 0.0000(19) 
O3 0.027(2) 0.055(3) 0.035(3) 0.004(2) -0.012(2) -0.015(2) 
O4 0.036(3) 0.033(3) 0.050(3) 0.007(2) -0.020(2) 0.000(2) 
O5 0.035(3) 0.034(3) 0.039(3) 0.004(2) -0.012(2) 0.000(2) 
O6 0.036(3) 0.079(4) 0.057(3) 0.020(3) -0.025(2) -0.034(3) 
O7 0.024(2) 0.075(4) 0.044(3) 0.004(2) -0.011(2) -0.018(2) 
O8 0.040(3) 0.040(3) 0.047(3) 0.005(2) -0.017(2) -0.003(2) 
O9 0.042(3) 0.037(3) 0.049(3) 0.009(2) -0.014(2) 0.001(2) 
O10 0.032(2) 0.062(3) 0.032(3) 0.011(2) -0.008(2) -0.020(2) 
O11 0.035(2) 0.030(3) 0.035(3) 0.0037(19) -0.003(2) -0.002(2) 
O12 0.031(2) 0.041(3) 0.048(3) 0.005(2) -0.011(2) -0.017(2) 
O14 0.050(3) 0.060(3) 0.026(2) 0.013(2) -0.019(2) -0.021(3) 
O15 0.050(3) 0.044(3) 0.049(3) -0.009(2) -0.027(2) -0.015(2) 
O16 0.044(3) 0.058(3) 0.029(2) 0.010(2) -0.019(2) -0.019(2) 
O17 0.055(3) 0.052(3) 0.042(3) -0.008(2) -0.024(2) -0.022(3) 
O18 0.042(3) 0.071(4) 0.025(2) 0.014(2) -0.019(2) -0.019(3) 
O19 0.050(3) 0.035(3) 0.029(2) 0.004(2) -0.019(2) -0.002(2) 
O20 0.047(3) 0.045(3) 0.035(3) -0.005(2) -0.018(2) -0.020(2) 
O21 0.026(2) 0.049(3) 0.058(3) 0.002(2) -0.010(2) -0.014(2) 
O22 0.029(2) 0.049(3) 0.040(3) -0.011(2) -0.008(2) -0.021(2) 
O23 0.027(2) 0.033(3) 0.043(3) -0.007(2) -0.006(2) -0.007(2) 
O24 0.028(2) 0.042(3) 0.039(3) -0.008(2) -0.0100(19) -0.015(2) 
O25 0.056(3) 0.027(2) 0.027(2) -0.0041(19) -0.017(2) -0.005(2) 
O26 0.027(2) 0.026(2) 0.027(2) 0.0038(17) -0.0130(18) -0.0030(18) 
O27 0.056(3) 0.030(3) 0.028(2) 0.0060(19) -0.018(2) -0.016(2) 
O28 0.057(3) 0.034(3) 0.039(3) 0.007(2) -0.031(2) -0.022(2) 
O29 0.057(3) 0.037(3) 0.026(2) 0.0072(19) -0.021(2) -0.027(2) 
O30 0.043(3) 0.033(3) 0.032(2) 0.0093(19) -0.020(2) -0.015(2) 
O31 0.067(3) 0.028(3) 0.030(2) -0.0019(19) -0.022(2) -0.007(2) 
O32 0.034(2) 0.026(2) 0.023(2) 0.0025(17) -0.0121(18) -0.0032(19) 
O33 0.071(3) 0.038(3) 0.030(3) -0.001(2) -0.029(2) -0.006(2) 
O34 0.035(2) 0.039(3) 0.026(2) 0.0043(19) -0.0144(19) -0.005(2) 
O35 0.053(3) 0.043(3) 0.029(2) 0.003(2) -0.003(2) -0.013(2) 
O36 0.056(3) 0.054(3) 0.048(3) 0.020(3) 0.013(3) -0.003(3) 
O37 0.054(3) 0.060(4) 0.036(3) 0.012(2) 0.000(2) -0.012(3) 
O38 0.018(2) 0.032(3) 0.052(3) -0.003(2) -0.005(2) -0.0076(19) 
O39 0.057(3) 0.063(4) 0.043(3) 0.013(2) 0.001(3) -0.009(3) 
O40 0.048(3) 0.038(3) 0.027(2) 0.003(2) -0.003(2) -0.017(2) 
O41 0.055(3) 0.038(3) 0.029(2) 0.006(2) -0.004(2) -0.019(2) 
O43 0.026(2) 0.041(3) 0.031(2) -0.0071(19) -0.0038(18) -0.018(2) 
O44 0.098(5) 0.059(4) 0.049(3) -0.002(3) -0.005(3) -0.017(3) 
O45 0.131(6) 0.086(5) 0.050(4) 0.008(3) 0.002(4) -0.052(4) 
O46 0.057(3) 0.049(3) 0.041(3) -0.004(2) -0.026(2) -0.022(3) 
O47 0.090(4) 0.054(4) 0.042(3) 0.005(3) -0.009(3) -0.034(3) 
O1W 0.102(5) 0.129(6) 0.032(3) 0.024(3) -0.040(3) -0.071(4) 
O2W 0.038(2) 0.090(4) 0.020(2) 0.030(2) -0.0213(19) -0.049(3) 
O3W 0.056(3) 0.029(3) 0.037(3) 0.001(2) -0.019(2) -0.004(2) 
 
_geom_special_details 
; 
 All esds (except the esd in the dihedral angle between two l.s. planes) 
 are estimated using the full covariance matrix.  The cell esds are taken 
 into account individually in the estimation of esds in distances, angles 
 and torsion angles; correlations between esds in cell parameters are only 
 used when they are defined by crystal symmetry.  An approximate (isotropic) 
 treatment of cell esds is used for estimating esds involving l.s. planes. 
; 
 
loop_ 
 _geom_bond_atom_site_label_1 
 _geom_bond_atom_site_label_2 
 _geom_bond_distance 
 _geom_bond_site_symmetry_2 
 _geom_bond_publ_flag 
La1 O34 2.438(4) . ? 
La1 O20 2.442(4) . ? 
La1 O22 2.445(4) 1_455 ? 
La1 O5 2.467(4) 1_465 ? 
La1 O23 2.500(4) . ? 
La1 O31 2.550(4) . ? 
La1 O35 2.580(4) . ? 
La1 O32 2.748(4) . ? 
La1 C64 3.013(6) . ? 
La1 La3 4.2032(6) . ? 
La2 O2 2.450(4) 2_575 ? 
La2 O29 2.469(4) . ? 
La2 O38 2.484(4) . ? 
La2 O26 2.487(4) . ? 
La2 O43 2.509(4) 2_665 ? 
La2 O25 2.522(4) 2_665 ? 
La2 O40 2.573(4) . ? 
La2 O26 2.776(4) 2_665 ? 
La2 O3W 2.969(4) . ? 
La2 C53 3.009(6) 2_665 ? 
La3 O11 2.441(4) . ? 
La3 O28 2.461(4) . ? 
La3 O24 2.504(4) . ? 
La3 O32 2.507(4) . ? 
La3 O21 2.518(4) 1_455 ? 
La3 O33 2.540(4) . ? 
La3 O41 2.602(4) . ? 
La3 O2W 2.627(4) . ? 
La3 O34 2.869(4) . ? 
La3 C68 3.082(6) . ? 
La4 O1 2.400(4) 2_575 ? 
La4 O3 2.428(4) 2_675 ? 
La4 O15 2.449(4) 2_675 ? 
La4 O16 2.468(4) . ? 
La4 O4 2.487(4) . ? 
La4 O30 2.491(4) . ? 
La4 O39 2.581(5) . ? 
La4 O3W 2.790(4) . ? 
La5 O12 2.416(4) . ? 
La5 O18 2.427(4) 2_766 ? 
La5 O46 2.436(4) 2_665 ? 
La5 O10 2.452(4) 1_455 ? 
La5 O27 2.455(4) . ? 
La5 O8 2.497(4) . ? 
La5 O37 2.562(5) . ? 
La6 O6 2.439(4) 1_465 ? 
La6 O1W 2.450(6) . ? 
La6 O7 2.442(4) 1_565 ? 
La6 O9 2.462(4) 1_465 ? 
La6 O19 2.472(4) . ? 
La6 O17 2.477(4) 2_776 ? 
La6 O14 2.481(4) 2_675 ? 
La6 O36 2.607(5) . ? 
C1 C6 1.375(8) . ? 
C1 C2 1.381(8) . ? 
C1 C7 1.505(8) . ? 
C2 C3 1.381(7) . ? 
C2 H2A 0.9300 . ? 
C3 C4 1.395(8) . ? 
C3 H3A 0.9300 . ? 
C4 C5 1.373(8) . ? 
C4 C8 1.504(8) . ? 
C5 C6 1.386(8) . ? 
C5 H5A 0.9300 . ? 
C6 H6A 0.9300 . ? 
C7 O2 1.232(7) . ? 
C7 O1 1.258(7) . ? 
C8 O4 1.239(7) . ? 
C8 O3 1.243(7) . ? 
C9 C10 1.382(8) . ? 
C9 C14 1.385(8) . ? 
C9 C15 1.511(8) . ? 
C10 C11 1.358(8) . ? 
C10 H10A 0.9300 . ? 
C11 C12 1.370(8) . ? 
C11 H11A 0.9300 . ? 
C12 C13 1.380(8) . ? 
C12 C16 1.512(8) . ? 
C13 C14 1.361(8) . ? 
C13 H13A 0.9300 . ? 
C14 H14A 0.9300 . ? 
C15 O6 1.239(7) . ? 
C15 O5 1.242(7) . ? 
C16 O7 1.241(7) . ? 
C16 O8 1.252(7) . ? 
C17 C22 1.377(8) . ? 
C17 C18 1.385(8) . ? 
C17 H17A 0.9300 . ? 
C18 C19 1.383(8) . ? 
C18 H18A 0.9300 . ? 
C19 C20 1.375(8) . ? 
C19 C23 1.508(8) . ? 
C20 C21 1.394(8) . ? 
C20 H20A 0.9300 . ? 
C21 C22 1.381(8) . ? 
C21 H21A 0.9300 . ? 
C22 C24 1.500(7) . ? 
C23 O9 1.249(7) . ? 
C23 O10 1.265(7) . ? 
C24 O12 1.235(7) . ? 
C24 O11 1.251(7) . ? 
C25 C30 1.374(8) . ? 
C25 C26 1.392(7) . ? 
C25 H25A 0.9300 . ? 
C26 C27 1.392(8) . ? 
C26 H26A 0.9300 . ? 
C27 C28 1.382(8) . ? 
C27 C31 1.502(7) . ? 
C28 C29 1.380(7) . ? 
C28 H28A 0.9300 . ? 
C29 C30 1.384(8) . ? 
C29 H29A 0.9300 . ? 
C30 C32 1.501(7) . ? 
C31 O15 1.243(7) . ? 
C31 O16 1.254(7) . ? 
C32 O46 1.242(7) . ? 
C32 O14 1.263(7) . ? 
C33 C38 1.384(8) . ? 
C33 C34 1.386(7) . ? 
C33 H33A 0.9300 . ? 
C34 C35 1.399(8) . ? 
C34 H34A 0.9300 . ? 
C35 C36 1.378(8) . ? 
C35 C39 1.490(7) . ? 
C36 C37 1.367(7) . ? 
C36 H36A 0.9300 . ? 
C37 C38 1.384(8) . ? 
C37 H37A 0.9300 . ? 
C38 C40 1.503(7) . ? 
C39 O19 1.250(7) . ? 
C39 O20 1.252(7) . ? 
C40 O17 1.241(7) . ? 
C40 O18 1.247(8) . ? 
C41 C46 1.357(8) . ? 
C41 C42 1.390(8) . ? 
C41 H41A 0.9300 . ? 
C42 C43 1.377(8) . ? 
C42 H42A 0.9300 . ? 
C43 C44 1.380(8) . ? 
C43 C48 1.500(7) . ? 
C44 C45 1.378(8) . ? 
C44 H44A 0.9300 . ? 
C45 C46 1.381(8) . ? 
C45 H45A 0.9300 . ? 
C46 C47 1.509(8) . ? 
C47 O22 1.236(7) . ? 
C47 O21 1.263(7) . ? 
C48 O23 1.246(7) . ? 
C48 O24 1.267(7) . ? 
C49 C52 1.367(7) . ? 
C49 C50 1.377(8) . ? 
C49 H49A 0.9300 . ? 
C50 C51 1.393(8) . ? 
C50 C53 1.494(7) . ? 
C51 C55 1.387(7) . ? 
C51 H51A 0.9300 . ? 
C52 C56 1.399(7) . ? 
C52 H52A 0.9300 . ? 
C53 O25 1.236(7) . ? 
C53 O26 1.264(7) . ? 
C53 La2 3.009(6) 2_665 ? 
C54 O28 1.249(7) . ? 
C54 O27 1.254(7) . ? 
C54 C56 1.486(7) . ? 
C55 C56 1.376(8) . ? 
C55 H55A 0.9300 . ? 
C57 O29 1.244(6) . ? 
C57 O30 1.254(7) . ? 
C57 C58 1.494(7) . ? 
C58 C59 1.378(8) . ? 
C58 C63 1.379(7) . ? 
C59 C60 1.381(7) . ? 
C59 H59A 0.9300 . ? 
C60 C61 1.393(7) . ? 
C60 H60A 0.9300 . ? 
C61 C62 1.394(8) . ? 
C61 C64 1.494(7) . ? 
C62 C63 1.386(7) . ? 
C62 H62A 0.9300 . ? 
C63 H63A 0.9300 . ? 
C64 O31 1.231(6) . ? 
C64 O32 1.261(7) . ? 
C65 C66 1.380(7) 2_766 ? 
C65 C67 1.385(8) . ? 
C65 H65A 0.9300 . ? 
C66 C67 1.376(8) . ? 
C66 C65 1.380(7) 2_766 ? 
C66 H66A 0.9300 . ? 
C67 C68 1.493(7) . ? 
C68 O33 1.242(7) . ? 
C68 O34 1.262(7) . ? 
C69 N1 1.446(10) . ? 
C69 H69A 0.9600 . ? 
C69 H69B 0.9600 . ? 
C69 H69C 0.9600 . ? 
C70 N1 1.441(9) . ? 
C70 H70A 0.9600 . ? 
C70 H70B 0.9600 . ? 
C70 H70C 0.9600 . ? 
C71 O35 1.225(8) . ? 
C71 N1 1.322(9) . ? 
C72 N2 1.470(9) . ? 
C72 H72A 0.9600 . ? 
C72 H72B 0.9600 . ? 
C72 H72C 0.9600 . ? 
C73 N2 1.416(8) . ? 
C73 H73A 0.9600 . ? 
C73 H73B 0.9600 . ? 
C73 H73C 0.9600 . ? 
C74 O36 1.210(9) . ? 
C74 N2 1.297(8) . ? 
C75 N3 1.415(10) . ? 
C75 H75A 0.9600 . ? 
C75 H75B 0.9600 . ? 
C75 H75C 0.9600 . ? 
C76 N3 1.437(10) . ? 
C76 H76A 0.9600 . ? 
C76 H76B 0.9600 . ? 
C76 H76C 0.9600 . ? 
C77 O37 1.238(9) . ? 
C77 N3 1.313(9) . ? 
C78 C90 1.371(8) . ? 
C78 C79 1.371(7) 2_765 ? 
C78 H78A 0.9300 . ? 
C79 C78 1.371(7) 2_765 ? 
C79 C90 1.383(7) . ? 
C79 H79A 0.9300 . ? 
C80 O43 1.237(6) . ? 
C80 O38 1.238(7) . ? 
C80 C90 1.512(7) . ? 
C81 N5 1.384(10) . ? 
C81 H81A 0.9600 . ? 
C81 H81B 0.9600 . ? 
C81 H81C 0.9600 . ? 
C82 N5 1.460(10) . ? 
C82 H82A 0.9600 . ? 
C82 H82B 0.9600 . ? 
C82 H82C 0.9600 . ? 
C83 O39 1.268(9) . ? 
C83 N5 1.274(9) . ? 
C83 H83A 0.9300 . ? 
C84 N6 1.453(8) . ? 
C84 H84A 0.9600 . ? 
C84 H84B 0.9600 . ? 
C84 H84C 0.9600 . ? 
C85 N6 1.448(9) . ? 
C85 H85A 0.9600 . ? 
C85 H85B 0.9600 . ? 
C85 H85C 0.9600 . ? 
C86 O40 1.219(7) . ? 
C86 N6 1.327(8) . ? 
C86 H86A 0.9300 . ? 
C87 N7 1.440(8) . ? 
C87 H87A 0.9600 . ? 
C87 H87B 0.9600 . ? 
C87 H87C 0.9600 . ? 
C88 N7 1.447(9) . ? 
C88 H88A 0.9600 . ? 
C88 H88B 0.9600 . ? 
C88 H88C 0.9600 . ? 
C89 O41 1.218(7) . ? 
C89 N7 1.304(8) . ? 
C89 H89A 0.9300 . ? 
C91 N4 1.404(10) . ? 
C91 H91A 0.9600 . ? 
C91 H91B 0.9600 . ? 
C91 H91C 0.9600 . ? 
C92 N4 1.439(8) . ? 
C92 H92A 0.9600 . ? 
C92 H92B 0.9600 . ? 
C92 H92C 0.9600 . ? 
C93 O44 1.246(9) . ? 
C93 N4 1.330(10) . ? 
C93 H93A 0.9300 . ? 
C94 N8 1.431(10) . ? 
C94 H94A 0.9600 . ? 
C94 H94B 0.9600 . ? 
C94 H94C 0.9600 . ? 
C95 N8 1.426(10) . ? 
C95 H95A 0.9600 . ? 
C95 H95B 0.9600 . ? 
C95 H95C 0.9600 . ? 
C96 O45 1.257(10) . ? 
C96 N8 1.300(10) . ? 
C96 H96A 0.9300 . ? 
C97 N9 1.443(8) . ? 
C97 H97A 0.9600 . ? 
C97 H97B 0.9600 . ? 
C97 H97C 0.9600 . ? 
C98 N9 1.431(9) . ? 
C98 H98A 0.9600 . ? 
C98 H98B 0.9600 . ? 
C98 H98C 0.9600 . ? 
C99 O47 1.205(8) . ? 
C99 N9 1.331(9) . ? 
C99 H99A 0.9300 . ? 
O1 La4 2.400(4) 2_575 ? 
O2 La2 2.450(4) 2_575 ? 
O3 La4 2.428(4) 2_675 ? 
O5 La1 2.467(4) 1_645 ? 
O6 La6 2.439(4) 1_645 ? 
O7 La6 2.442(4) 1_545 ? 
O9 La6 2.462(4) 1_645 ? 
O10 La5 2.452(4) 1_655 ? 
O14 La6 2.481(4) 2_675 ? 
O15 La4 2.449(4) 2_675 ? 
O17 La6 2.477(4) 2_776 ? 
O18 La5 2.427(4) 2_766 ? 
O21 La3 2.518(4) 1_655 ? 
O22 La1 2.445(4) 1_655 ? 
O25 La2 2.522(4) 2_665 ? 
O26 La2 2.776(4) 2_665 ? 
O43 La2 2.509(4) 2_665 ? 
O46 La5 2.436(4) 2_665 ? 
O1W H1WA 0.8501 . ? 
O1W H1WB 0.8498 . ? 
O2W H2WA 0.8500 . ? 
O2W H2WB 0.8501 . ? 
O3W H3WA 0.8502 . ? 
O3W H3WB 0.8500 . ? 
 
loop_ 
 _geom_angle_atom_site_label_1 
 _geom_angle_atom_site_label_2 
 _geom_angle_atom_site_label_3 
 _geom_angle 
 _geom_angle_site_symmetry_1 
 _geom_angle_site_symmetry_3 
 _geom_angle_publ_flag 
O34 La1 O20 97.83(14) . . ? 
O34 La1 O22 78.44(14) . 1_455 ? 
O20 La1 O22 144.43(14) . 1_455 ? 
O34 La1 O5 150.32(15) . 1_465 ? 
O20 La1 O5 90.12(14) . 1_465 ? 
O22 La1 O5 78.56(14) 1_455 1_465 ? 
O34 La1 O23 74.24(14) . . ? 
O20 La1 O23 75.01(14) . . ? 
O22 La1 O23 135.08(13) 1_455 . ? 
O5 La1 O23 135.36(15) 1_465 . ? 
O34 La1 O31 123.58(13) . . ? 
O20 La1 O31 122.09(15) . . ? 
O22 La1 O31 87.11(15) 1_455 . ? 
O5 La1 O31 73.52(14) 1_465 . ? 
O23 La1 O31 79.40(14) . . ? 
O34 La1 O35 74.90(14) . . ? 
O20 La1 O35 72.32(15) . . ? 
O22 La1 O35 72.58(14) 1_455 . ? 
O5 La1 O35 80.48(14) 1_465 . ? 
O23 La1 O35 130.77(14) . . ? 
O31 La1 O35 149.74(15) . . ? 
O34 La1 O32 76.33(12) . . ? 
O20 La1 O32 148.26(14) . . ? 
O22 La1 O32 65.88(13) 1_455 . ? 
O5 La1 O32 110.52(12) 1_465 . ? 
O23 La1 O32 73.38(12) . . ? 
O31 La1 O32 48.38(12) . . ? 
O35 La1 O32 133.09(13) . . ? 
O34 La1 C64 100.84(14) . . ? 
O20 La1 C64 140.26(16) . . ? 
O22 La1 C64 74.16(15) 1_455 . ? 
O5 La1 C64 90.65(14) 1_465 . ? 
O23 La1 C64 76.80(14) . . ? 
O31 La1 C64 23.74(14) . . ? 
O35 La1 C64 146.65(15) . . ? 
O32 La1 C64 24.75(13) . . ? 
O34 La1 La3 41.38(9) . . ? 
O20 La1 La3 131.35(10) . . ? 
O22 La1 La3 66.47(10) 1_455 . ? 
O5 La1 La3 138.51(10) 1_465 . ? 
O23 La1 La3 69.42(9) . . ? 
O31 La1 La3 82.81(9) . . ? 
O35 La1 La3 108.01(10) . . ? 
O32 La1 La3 34.95(8) . . ? 
C64 La1 La3 59.55(11) . . ? 
O2 La2 O29 89.85(14) 2_575 . ? 
O2 La2 O38 143.01(14) 2_575 . ? 
O29 La2 O38 77.91(14) . . ? 
O2 La2 O26 146.38(13) 2_575 . ? 
O29 La2 O26 99.04(13) . . ? 
O38 La2 O26 70.55(13) . . ? 
O2 La2 O43 78.42(13) 2_575 2_665 ? 
O29 La2 O43 143.13(13) . 2_665 ? 
O38 La2 O43 130.37(13) . 2_665 ? 
O26 La2 O43 75.11(13) . 2_665 ? 
O2 La2 O25 74.81(13) 2_575 2_665 ? 
O29 La2 O25 129.59(13) . 2_665 ? 
O38 La2 O25 86.36(14) . 2_665 ? 
O26 La2 O25 120.28(12) . 2_665 ? 
O43 La2 O25 81.11(14) 2_665 2_665 ? 
O2 La2 O40 77.48(14) 2_575 . ? 
O29 La2 O40 71.51(13) . . ? 
O38 La2 O40 128.77(14) . . ? 
O26 La2 O40 74.85(13) . . ? 
O43 La2 O40 71.85(13) 2_665 . ? 
O25 La2 O40 144.47(14) 2_665 . ? 
O2 La2 O26 113.97(12) 2_575 2_665 ? 
O29 La2 O26 149.79(13) . 2_665 ? 
O38 La2 O26 71.90(12) . 2_665 ? 
O26 La2 O26 71.79(13) . 2_665 ? 
O43 La2 O26 63.89(12) 2_665 2_665 ? 
O25 La2 O26 48.59(12) 2_665 2_665 ? 
O40 La2 O26 129.67(12) . 2_665 ? 
O2 La2 O3W 78.84(13) 2_575 . ? 
O29 La2 O3W 67.73(12) . . ? 
O38 La2 O3W 64.19(13) . . ? 
O26 La2 O3W 134.50(12) . . ? 
O43 La2 O3W 140.82(12) 2_665 . ? 
O25 La2 O3W 62.32(12) 2_665 . ? 
O40 La2 O3W 132.39(12) . . ? 
O26 La2 O3W 97.69(11) 2_665 . ? 
O2 La2 C53 93.62(14) 2_575 2_665 ? 
O29 La2 C53 145.97(15) . 2_665 ? 
O38 La2 C53 79.14(14) . 2_665 ? 
O26 La2 C53 96.59(14) . 2_665 ? 
O43 La2 C53 70.34(14) 2_665 2_665 ? 
O25 La2 C53 23.80(14) 2_665 2_665 ? 
O40 La2 C53 142.17(14) . 2_665 ? 
O26 La2 C53 24.82(13) 2_665 2_665 ? 
O3W La2 C53 79.76(13) . 2_665 ? 
O11 La3 O28 90.38(14) . . ? 
O11 La3 O24 80.40(14) . . ? 
O28 La3 O24 141.11(14) . . ? 
O11 La3 O32 145.31(14) . . ? 
O28 La3 O32 94.58(13) . . ? 
O24 La3 O32 74.30(13) . . ? 
O11 La3 O21 144.81(15) . 1_455 ? 
O28 La3 O21 76.34(15) . 1_455 ? 
O24 La3 O21 129.49(14) . 1_455 ? 
O32 La3 O21 69.20(14) . 1_455 ? 
O11 La3 O33 76.00(14) . . ? 
O28 La3 O33 136.18(14) . . ? 
O24 La3 O33 78.16(15) . . ? 
O32 La3 O33 120.24(13) . . ? 
O21 La3 O33 91.16(15) 1_455 . ? 
O11 La3 O41 75.43(14) . . ? 
O28 La3 O41 70.20(14) . . ? 
O24 La3 O41 70.91(13) . . ? 
O32 La3 O41 74.11(13) . . ? 
O21 La3 O41 127.27(14) 1_455 . ? 
O33 La3 O41 140.68(15) . . ? 
O11 La3 O2W 79.32(14) . . ? 
O28 La3 O2W 70.82(13) . . ? 
O24 La3 O2W 141.91(12) . . ? 
O32 La3 O2W 134.54(13) . . ? 
O21 La3 O2W 65.57(14) 1_455 . ? 
O33 La3 O2W 65.82(13) . . ? 
O41 La3 O2W 132.83(13) . . ? 
O11 La3 O34 116.02(12) . . ? 
O28 La3 O34 149.20(13) . . ? 
O24 La3 O34 63.73(12) . . ? 
O32 La3 O34 73.07(11) . . ? 
O21 La3 O34 72.90(13) 1_455 . ? 
O33 La3 O34 47.18(12) . . ? 
O41 La3 O34 129.36(13) . . ? 
O2W La3 O34 97.48(12) . . ? 
O11 La3 C68 95.42(15) . . ? 
O28 La3 C68 149.88(16) . . ? 
O24 La3 C68 68.98(15) . . ? 
O32 La3 C68 97.19(14) . . ? 
O21 La3 C68 82.12(15) 1_455 . ? 
O33 La3 C68 23.04(14) . . ? 
O41 La3 C68 139.81(15) . . ? 
O2W La3 C68 81.24(14) . . ? 
O34 La3 C68 24.14(13) . . ? 
O11 La3 La1 140.57(10) . . ? 
O28 La3 La1 127.53(10) . . ? 
O24 La3 La1 63.48(9) . . ? 
O32 La3 La1 38.90(8) . . ? 
O21 La3 La1 66.14(10) 1_455 . ? 
O33 La3 La1 81.35(10) . . ? 
O41 La3 La1 104.92(10) . . ? 
O2W La3 La1 119.66(10) . . ? 
O34 La3 La1 34.17(8) . . ? 
C68 La3 La1 58.31(11) . . ? 
O1 La4 O3 138.93(15) 2_575 2_675 ? 
O1 La4 O15 147.12(16) 2_575 2_675 ? 
O3 La4 O15 73.88(15) 2_675 2_675 ? 
O1 La4 O16 78.84(15) 2_575 . ? 
O3 La4 O16 76.22(14) 2_675 . ? 
O15 La4 O16 120.84(15) 2_675 . ? 
O1 La4 O4 83.02(15) 2_575 . ? 
O3 La4 O4 120.12(15) 2_675 . ? 
O15 La4 O4 78.31(14) 2_675 . ? 
O16 La4 O4 74.54(15) . . ? 
O1 La4 O30 96.08(14) 2_575 . ? 
O3 La4 O30 80.04(14) 2_675 . ? 
O15 La4 O30 86.87(14) 2_675 . ? 
O16 La4 O30 135.49(14) . . ? 
O4 La4 O30 149.41(14) . . ? 
O1 La4 O39 73.12(17) 2_575 . ? 
O3 La4 O39 140.35(15) 2_675 . ? 
O15 La4 O39 76.71(17) 2_675 . ? 
O16 La4 O39 142.85(15) . . ? 
O4 La4 O39 78.25(15) . . ? 
O30 La4 O39 72.33(15) . . ? 
O1 La4 O3W 67.13(14) 2_575 . ? 
O3 La4 O3W 74.97(14) 2_675 . ? 
O15 La4 O3W 139.91(14) 2_675 . ? 
O16 La4 O3W 74.38(14) . . ? 
O4 La4 O3W 140.24(13) . . ? 
O30 La4 O3W 63.30(12) . . ? 
O39 La4 O3W 114.74(15) . . ? 
O12 La5 O18 80.44(15) . 2_766 ? 
O12 La5 O46 148.40(15) . 2_665 ? 
O18 La5 O46 122.74(16) 2_766 2_665 ? 
O12 La5 O10 133.95(15) . 1_455 ? 
O18 La5 O10 76.78(14) 2_766 1_455 ? 
O46 La5 O10 76.09(15) 2_665 1_455 ? 
O12 La5 O27 89.22(14) . . ? 
O18 La5 O27 126.69(15) 2_766 . ? 
O46 La5 O27 91.67(14) 2_665 . ? 
O10 La5 O27 73.84(15) 1_455 . ? 
O12 La5 O8 80.47(15) . . ? 
O18 La5 O8 77.13(15) 2_766 . ? 
O46 La5 O8 84.27(15) 2_665 . ? 
O10 La5 O8 130.87(16) 1_455 . ? 
O27 La5 O8 152.25(15) . . ? 
O12 La5 O37 73.81(16) . . ? 
O18 La5 O37 146.10(15) 2_766 . ? 
O46 La5 O37 75.91(16) 2_665 . ? 
O10 La5 O37 137.12(14) 1_455 . ? 
O27 La5 O37 75.21(15) . . ? 
O8 La5 O37 77.18(15) . . ? 
O6 La6 O1W 72.80(17) 1_465 . ? 
O6 La6 O7 144.28(15) 1_465 1_565 ? 
O1W La6 O7 74.35(17) . 1_565 ? 
O6 La6 O9 87.24(16) 1_465 1_465 ? 
O1W La6 O9 142.06(15) . 1_465 ? 
O7 La6 O9 111.10(16) 1_565 1_465 ? 
O6 La6 O19 88.36(15) 1_465 . ? 
O1W La6 O19 66.19(15) . . ? 
O7 La6 O19 91.02(15) 1_565 . ? 
O9 La6 O19 146.87(14) 1_465 . ? 
O6 La6 O17 145.02(16) 1_465 2_776 ? 
O1W La6 O17 135.33(16) . 2_776 ? 
O7 La6 O17 70.55(15) 1_565 2_776 ? 
O9 La6 O17 77.70(15) 1_465 2_776 ? 
O19 La6 O17 87.52(15) . 2_776 ? 
O6 La6 O14 80.72(15) 1_465 2_675 ? 
O1W La6 O14 72.66(16) . 2_675 ? 
O7 La6 O14 76.45(14) 1_565 2_675 ? 
O9 La6 O14 72.49(15) 1_465 2_675 ? 
O19 La6 O14 138.82(14) . 2_675 ? 
O17 La6 O14 122.87(16) 2_776 2_675 ? 
O6 La6 O36 73.79(17) 1_465 . ? 
O1W La6 O36 126.59(17) . . ? 
O7 La6 O36 139.35(16) 1_565 . ? 
O9 La6 O36 74.82(15) 1_465 . ? 
O19 La6 O36 72.43(15) . . ? 
O17 La6 O36 71.85(17) 2_776 . ? 
O14 La6 O36 139.11(15) 2_675 . ? 
C6 C1 C2 120.3(5) . . ? 
C6 C1 C7 120.1(5) . . ? 
C2 C1 C7 119.6(5) . . ? 
C3 C2 C1 120.1(6) . . ? 
C3 C2 H2A 119.9 . . ? 
C1 C2 H2A 119.9 . . ? 
C2 C3 C4 119.8(5) . . ? 
C2 C3 H3A 120.1 . . ? 
C4 C3 H3A 120.1 . . ? 
C5 C4 C3 119.4(5) . . ? 
C5 C4 C8 120.6(6) . . ? 
C3 C4 C8 120.0(5) . . ? 
C4 C5 C6 120.8(6) . . ? 
C4 C5 H5A 119.6 . . ? 
C6 C5 H5A 119.6 . . ? 
C1 C6 C5 119.5(6) . . ? 
C1 C6 H6A 120.2 . . ? 
C5 C6 H6A 120.2 . . ? 
O2 C7 O1 123.6(6) . . ? 
O2 C7 C1 120.0(5) . . ? 
O1 C7 C1 116.3(5) . . ? 
O4 C8 O3 125.2(6) . . ? 
O4 C8 C4 117.7(6) . . ? 
O3 C8 C4 117.1(6) . . ? 
C10 C9 C14 119.0(6) . . ? 
C10 C9 C15 121.0(5) . . ? 
C14 C9 C15 120.0(5) . . ? 
C11 C10 C9 120.2(6) . . ? 
C11 C10 H10A 119.9 . . ? 
C9 C10 H10A 119.9 . . ? 
C10 C11 C12 120.9(6) . . ? 
C10 C11 H11A 119.6 . . ? 
C12 C11 H11A 119.6 . . ? 
C11 C12 C13 119.3(5) . . ? 
C11 C12 C16 119.9(6) . . ? 
C13 C12 C16 120.7(5) . . ? 
C14 C13 C12 120.3(6) . . ? 
C14 C13 H13A 119.9 . . ? 
C12 C13 H13A 119.9 . . ? 
C13 C14 C9 120.3(6) . . ? 
C13 C14 H14A 119.8 . . ? 
C9 C14 H14A 119.8 . . ? 
O6 C15 O5 124.2(6) . . ? 
O6 C15 C9 116.8(6) . . ? 
O5 C15 C9 119.0(5) . . ? 
O7 C16 O8 122.6(6) . . ? 
O7 C16 C12 118.8(6) . . ? 
O8 C16 C12 118.6(6) . . ? 
C22 C17 C18 120.9(6) . . ? 
C22 C17 H17A 119.6 . . ? 
C18 C17 H17A 119.6 . . ? 
C19 C18 C17 119.8(6) . . ? 
C19 C18 H18A 120.1 . . ? 
C17 C18 H18A 120.1 . . ? 
C20 C19 C18 119.6(5) . . ? 
C20 C19 C23 119.7(6) . . ? 
C18 C19 C23 120.7(6) . . ? 
C19 C20 C21 120.4(6) . . ? 
C19 C20 H20A 119.8 . . ? 
C21 C20 H20A 119.8 . . ? 
C22 C21 C20 120.0(6) . . ? 
C22 C21 H21A 120.0 . . ? 
C20 C21 H21A 120.0 . . ? 
C17 C22 C21 119.2(5) . . ? 
C17 C22 C24 122.0(5) . . ? 
C21 C22 C24 118.7(5) . . ? 
O9 C23 O10 124.8(6) . . ? 
O9 C23 C19 117.6(6) . . ? 
O10 C23 C19 117.6(6) . . ? 
O12 C24 O11 123.5(5) . . ? 
O12 C24 C22 118.8(5) . . ? 
O11 C24 C22 117.5(5) . . ? 
C30 C25 C26 120.0(5) . . ? 
C30 C25 H25A 120.0 . . ? 
C26 C25 H25A 120.0 . . ? 
C27 C26 C25 120.5(5) . . ? 
C27 C26 H26A 119.7 . . ? 
C25 C26 H26A 119.7 . . ? 
C28 C27 C26 118.8(5) . . ? 
C28 C27 C31 120.6(5) . . ? 
C26 C27 C31 120.5(5) . . ? 
C29 C28 C27 120.5(6) . . ? 
C29 C28 H28A 119.7 . . ? 
C27 C28 H28A 119.7 . . ? 
C28 C29 C30 120.6(6) . . ? 
C28 C29 H29A 119.7 . . ? 
C30 C29 H29A 119.7 . . ? 
C25 C30 C29 119.6(5) . . ? 
C25 C30 C32 119.9(5) . . ? 
C29 C30 C32 120.4(5) . . ? 
O15 C31 O16 125.0(6) . . ? 
O15 C31 C27 117.6(6) . . ? 
O16 C31 C27 117.4(5) . . ? 
O46 C32 O14 124.4(6) . . ? 
O46 C32 C30 118.1(5) . . ? 
O14 C32 C30 117.5(5) . . ? 
C38 C33 C34 120.2(6) . . ? 
C38 C33 H33A 119.9 . . ? 
C34 C33 H33A 119.9 . . ? 
C33 C34 C35 120.0(6) . . ? 
C33 C34 H34A 120.0 . . ? 
C35 C34 H34A 120.0 . . ? 
C36 C35 C34 118.9(5) . . ? 
C36 C35 C39 120.4(5) . . ? 
C34 C35 C39 120.6(5) . . ? 
C37 C36 C35 121.0(6) . . ? 
C37 C36 H36A 119.5 . . ? 
C35 C36 H36A 119.5 . . ? 
C36 C37 C38 120.6(6) . . ? 
C36 C37 H37A 119.7 . . ? 
C38 C37 H37A 119.7 . . ? 
C33 C38 C37 119.3(5) . . ? 
C33 C38 C40 121.6(6) . . ? 
C37 C38 C40 119.1(5) . . ? 
O19 C39 O20 124.5(5) . . ? 
O19 C39 C35 116.8(5) . . ? 
O20 C39 C35 118.6(5) . . ? 
O17 C40 O18 125.8(6) . . ? 
O17 C40 C38 117.4(6) . . ? 
O18 C40 C38 116.8(6) . . ? 
C46 C41 C42 121.1(6) . . ? 
C46 C41 H41A 119.5 . . ? 
C42 C41 H41A 119.5 . . ? 
C43 C42 C41 119.8(6) . . ? 
C43 C42 H42A 120.1 . . ? 
C41 C42 H42A 120.1 . . ? 
C42 C43 C44 118.9(5) . . ? 
C42 C43 C48 121.2(5) . . ? 
C44 C43 C48 119.8(5) . . ? 
C45 C44 C43 120.8(6) . . ? 
C45 C44 H44A 119.6 . . ? 
C43 C44 H44A 119.6 . . ? 
C44 C45 C46 120.0(6) . . ? 
C44 C45 H45A 120.0 . . ? 
C46 C45 H45A 120.0 . . ? 
C41 C46 C45 119.4(6) . . ? 
C41 C46 C47 119.9(5) . . ? 
C45 C46 C47 120.7(6) . . ? 
O22 C47 O21 125.2(6) . . ? 
O22 C47 C46 117.1(5) . . ? 
O21 C47 C46 117.7(5) . . ? 
O23 C48 O24 125.1(5) . . ? 
O23 C48 C43 119.3(5) . . ? 
O24 C48 C43 115.6(5) . . ? 
C52 C49 C50 121.1(5) . . ? 
C52 C49 H49A 119.4 . . ? 
C50 C49 H49A 119.4 . . ? 
C49 C50 C51 119.3(5) . . ? 
C49 C50 C53 120.7(5) . . ? 
C51 C50 C53 120.0(5) . . ? 
C55 C51 C50 119.7(6) . . ? 
C55 C51 H51A 120.1 . . ? 
C50 C51 H51A 120.1 . . ? 
C49 C52 C56 120.0(6) . . ? 
C49 C52 H52A 120.0 . . ? 
C56 C52 H52A 120.0 . . ? 
O25 C53 O26 122.5(5) . . ? 
O25 C53 C50 118.4(5) . . ? 
O26 C53 C50 119.1(5) . . ? 
O25 C53 La2 55.4(3) . 2_665 ? 
O26 C53 La2 67.2(3) . 2_665 ? 
C50 C53 La2 172.8(4) . 2_665 ? 
O28 C54 O27 123.5(5) . . ? 
O28 C54 C56 118.1(5) . . ? 
O27 C54 C56 118.4(5) . . ? 
C56 C55 C51 120.6(5) . . ? 
C56 C55 H55A 119.7 . . ? 
C51 C55 H55A 119.7 . . ? 
C55 C56 C52 119.2(5) . . ? 
C55 C56 C54 120.2(5) . . ? 
C52 C56 C54 120.5(5) . . ? 
O29 C57 O30 124.5(5) . . ? 
O29 C57 C58 118.1(5) . . ? 
O30 C57 C58 117.3(5) . . ? 
C59 C58 C63 118.8(5) . . ? 
C59 C58 C57 120.3(5) . . ? 
C63 C58 C57 120.9(5) . . ? 
C58 C59 C60 121.6(5) . . ? 
C58 C59 H59A 119.2 . . ? 
C60 C59 H59A 119.2 . . ? 
C59 C60 C61 119.4(6) . . ? 
C59 C60 H60A 120.3 . . ? 
C61 C60 H60A 120.3 . . ? 
C62 C61 C60 119.4(5) . . ? 
C62 C61 C64 119.9(5) . . ? 
C60 C61 C64 120.6(5) . . ? 
C63 C62 C61 119.7(5) . . ? 
C63 C62 H62A 120.1 . . ? 
C61 C62 H62A 120.1 . . ? 
C58 C63 C62 121.0(6) . . ? 
C58 C63 H63A 119.5 . . ? 
C62 C63 H63A 119.5 . . ? 
O31 C64 O32 121.9(5) . . ? 
O31 C64 C61 119.0(5) . . ? 
O32 C64 C61 119.1(5) . . ? 
O31 C64 La1 56.6(3) . . ? 
O32 C64 La1 65.8(3) . . ? 
C61 C64 La1 171.8(4) . . ? 
C66 C65 C67 120.7(6) 2_766 . ? 
C66 C65 H65A 119.6 2_766 . ? 
C67 C65 H65A 119.6 . . ? 
C67 C66 C65 120.5(6) . 2_766 ? 
C67 C66 H66A 119.7 . . ? 
C65 C66 H66A 119.7 2_766 . ? 
C66 C67 C65 118.7(5) . . ? 
C66 C67 C68 121.1(5) . . ? 
C65 C67 C68 120.1(5) . . ? 
O33 C68 O34 121.6(5) . . ? 
O33 C68 C67 119.1(5) . . ? 
O34 C68 C67 119.3(5) . . ? 
O33 C68 La3 53.2(3) . . ? 
O34 C68 La3 68.4(3) . . ? 
C67 C68 La3 172.3(4) . . ? 
N1 C69 H69A 109.5 . . ? 
N1 C69 H69B 109.5 . . ? 
H69A C69 H69B 109.5 . . ? 
N1 C69 H69C 109.5 . . ? 
H69A C69 H69C 109.5 . . ? 
H69B C69 H69C 109.5 . . ? 
N1 C70 H70A 109.5 . . ? 
N1 C70 H70B 109.5 . . ? 
H70A C70 H70B 109.5 . . ? 
N1 C70 H70C 109.5 . . ? 
H70A C70 H70C 109.5 . . ? 
H70B C70 H70C 109.5 . . ? 
O35 C71 N1 124.4(7) . . ? 
N2 C72 H72A 109.5 . . ? 
N2 C72 H72B 109.5 . . ? 
H72A C72 H72B 109.5 . . ? 
N2 C72 H72C 109.5 . . ? 
H72A C72 H72C 109.5 . . ? 
H72B C72 H72C 109.5 . . ? 
N2 C73 H73A 109.5 . . ? 
N2 C73 H73B 109.5 . . ? 
H73A C73 H73B 109.5 . . ? 
N2 C73 H73C 109.5 . . ? 
H73A C73 H73C 109.5 . . ? 
H73B C73 H73C 109.5 . . ? 
O36 C74 N2 122.6(8) . . ? 
N3 C75 H75A 109.5 . . ? 
N3 C75 H75B 109.5 . . ? 
H75A C75 H75B 109.5 . . ? 
N3 C75 H75C 109.5 . . ? 
H75A C75 H75C 109.5 . . ? 
H75B C75 H75C 109.5 . . ? 
N3 C76 H76A 109.5 . . ? 
N3 C76 H76B 109.5 . . ? 
H76A C76 H76B 109.5 . . ? 
N3 C76 H76C 109.5 . . ? 
H76A C76 H76C 109.5 . . ? 
H76B C76 H76C 109.5 . . ? 
O37 C77 N3 122.1(7) . . ? 
C90 C78 C79 121.3(5) . 2_765 ? 
C90 C78 H78A 119.3 . . ? 
C79 C78 H78A 119.3 2_765 . ? 
C78 C79 C90 120.2(5) 2_765 . ? 
C78 C79 H79A 119.9 2_765 . ? 
C90 C79 H79A 119.9 . . ? 
O43 C80 O38 126.0(5) . . ? 
O43 C80 C90 116.6(5) . . ? 
O38 C80 C90 117.4(5) . . ? 
N5 C81 H81A 109.5 . . ? 
N5 C81 H81B 109.5 . . ? 
H81A C81 H81B 109.5 . . ? 
N5 C81 H81C 109.5 . . ? 
H81A C81 H81C 109.5 . . ? 
H81B C81 H81C 109.5 . . ? 
N5 C82 H82A 109.5 . . ? 
N5 C82 H82B 109.5 . . ? 
H82A C82 H82B 109.5 . . ? 
N5 C82 H82C 109.5 . . ? 
H82A C82 H82C 109.5 . . ? 
H82B C82 H82C 109.5 . . ? 
O39 C83 N5 122.8(8) . . ? 
O39 C83 H83A 118.6 . . ? 
N5 C83 H83A 118.6 . . ? 
N6 C84 H84A 109.5 . . ? 
N6 C84 H84B 109.5 . . ? 
H84A C84 H84B 109.5 . . ? 
N6 C84 H84C 109.5 . . ? 
H84A C84 H84C 109.5 . . ? 
H84B C84 H84C 109.5 . . ? 
N6 C85 H85A 109.5 . . ? 
N6 C85 H85B 109.5 . . ? 
H85A C85 H85B 109.5 . . ? 
N6 C85 H85C 109.5 . . ? 
H85A C85 H85C 109.5 . . ? 
H85B C85 H85C 109.5 . . ? 
O40 C86 N6 126.2(6) . . ? 
O40 C86 H86A 116.9 . . ? 
N6 C86 H86A 116.9 . . ? 
N7 C87 H87A 109.5 . . ? 
N7 C87 H87B 109.5 . . ? 
H87A C87 H87B 109.5 . . ? 
N7 C87 H87C 109.5 . . ? 
H87A C87 H87C 109.5 . . ? 
H87B C87 H87C 109.5 . . ? 
N7 C88 H88A 109.5 . . ? 
N7 C88 H88B 109.5 . . ? 
H88A C88 H88B 109.5 . . ? 
N7 C88 H88C 109.5 . . ? 
H88A C88 H88C 109.5 . . ? 
H88B C88 H88C 109.5 . . ? 
O41 C89 N7 126.5(6) . . ? 
O41 C89 H89A 116.7 . . ? 
N7 C89 H89A 116.7 . . ? 
C78 C90 C79 118.4(5) . . ? 
C78 C90 C80 120.3(5) . . ? 
C79 C90 C80 121.2(5) . . ? 
N4 C91 H91A 109.5 . . ? 
N4 C91 H91B 109.5 . . ? 
H91A C91 H91B 109.5 . . ? 
N4 C91 H91C 109.5 . . ? 
H91A C91 H91C 109.5 . . ? 
H91B C91 H91C 109.5 . . ? 
N4 C92 H92A 109.5 . . ? 
N4 C92 H92B 109.5 . . ? 
H92A C92 H92B 109.5 . . ? 
N4 C92 H92C 109.5 . . ? 
H92A C92 H92C 109.5 . . ? 
H92B C92 H92C 109.5 . . ? 
O44 C93 N4 124.4(8) . . ? 
O44 C93 H93A 117.8 . . ? 
N4 C93 H93A 117.8 . . ? 
N8 C94 H94A 109.5 . . ? 
N8 C94 H94B 109.5 . . ? 
H94A C94 H94B 109.5 . . ? 
N8 C94 H94C 109.5 . . ? 
H94A C94 H94C 109.5 . . ? 
H94B C94 H94C 109.5 . . ? 
N8 C95 H95A 109.5 . . ? 
N8 C95 H95B 109.5 . . ? 
H95A C95 H95B 109.5 . . ? 
N8 C95 H95C 109.5 . . ? 
H95A C95 H95C 109.5 . . ? 
H95B C95 H95C 109.5 . . ? 
O45 C96 N8 122.3(9) . . ? 
O45 C96 H96A 118.9 . . ? 
N8 C96 H96A 118.9 . . ? 
N9 C97 H97A 109.5 . . ? 
N9 C97 H97B 109.5 . . ? 
H97A C97 H97B 109.5 . . ? 
N9 C97 H97C 109.5 . . ? 
H97A C97 H97C 109.5 . . ? 
H97B C97 H97C 109.5 . . ? 
N9 C98 H98A 109.5 . . ? 
N9 C98 H98B 109.5 . . ? 
H98A C98 H98B 109.5 . . ? 
N9 C98 H98C 109.5 . . ? 
H98A C98 H98C 109.5 . . ? 
H98B C98 H98C 109.5 . . ? 
O47 C99 N9 126.9(7) . . ? 
O47 C99 H99A 116.6 . . ? 
N9 C99 H99A 116.6 . . ? 
C71 N1 C70 121.3(7) . . ? 
C71 N1 C69 121.1(7) . . ? 
C70 N1 C69 117.5(7) . . ? 
C74 N2 C73 128.2(7) . . ? 
C74 N2 C72 116.4(6) . . ? 
C73 N2 C72 115.2(6) . . ? 
C77 N3 C75 123.6(7) . . ? 
C77 N3 C76 118.8(7) . . ? 
C75 N3 C76 117.5(7) . . ? 
C93 N4 C91 121.4(7) . . ? 
C93 N4 C92 119.4(7) . . ? 
C91 N4 C92 119.0(7) . . ? 
C83 N5 C81 124.2(8) . . ? 
C83 N5 C82 119.5(7) . . ? 
C81 N5 C82 116.3(7) . . ? 
C86 N6 C85 121.1(6) . . ? 
C86 N6 C84 120.2(6) . . ? 
C85 N6 C84 118.5(6) . . ? 
C89 N7 C87 121.3(6) . . ? 
C89 N7 C88 121.5(6) . . ? 
C87 N7 C88 117.1(6) . . ? 
C96 N8 C95 123.1(8) . . ? 
C96 N8 C94 121.6(8) . . ? 
C95 N8 C94 115.2(8) . . ? 
C99 N9 C98 123.5(6) . . ? 
C99 N9 C97 120.7(7) . . ? 
C98 N9 C97 115.8(6) . . ? 
C7 O1 La4 162.4(4) . 2_575 ? 
C7 O2 La2 130.1(4) . 2_575 ? 
C8 O3 La4 140.3(4) . 2_675 ? 
C8 O4 La4 132.9(4) . . ? 
C15 O5 La1 119.9(4) . 1_645 ? 
C15 O6 La6 171.7(4) . 1_645 ? 
C16 O7 La6 159.5(4) . 1_545 ? 
C16 O8 La5 116.3(4) . . ? 
C23 O9 La6 137.7(4) . 1_645 ? 
C23 O10 La5 136.1(4) . 1_655 ? 
C24 O11 La3 135.0(4) . . ? 
C24 O12 La5 161.7(4) . . ? 
C32 O14 La6 138.5(4) . 2_675 ? 
C31 O15 La4 157.4(4) . 2_675 ? 
C31 O16 La4 136.5(4) . . ? 
C40 O17 La6 150.0(4) . 2_776 ? 
C40 O18 La5 139.6(4) . 2_766 ? 
C39 O19 La6 140.1(4) . . ? 
C39 O20 La1 145.7(4) . . ? 
C47 O21 La3 132.3(4) . 1_655 ? 
C47 O22 La1 138.3(4) . 1_655 ? 
C48 O23 La1 127.7(4) . . ? 
C48 O24 La3 142.1(4) . . ? 
C53 O25 La2 100.8(4) . 2_665 ? 
C53 O26 La2 163.7(4) . . ? 
C53 O26 La2 88.0(3) . 2_665 ? 
La2 O26 La2 108.21(13) . 2_665 ? 
C54 O27 La5 141.1(4) . . ? 
C54 O28 La3 147.2(4) . . ? 
C57 O29 La2 152.3(4) . . ? 
C57 O30 La4 136.7(4) . . ? 
C64 O31 La1 99.7(4) . . ? 
C64 O32 La3 162.6(4) . . ? 
C64 O32 La1 89.5(3) . . ? 
La3 O32 La1 106.15(12) . . ? 
C68 O33 La3 103.8(4) . . ? 
C68 O34 La1 167.9(4) . . ? 
C68 O34 La3 87.4(3) . . ? 
La1 O34 La3 104.45(13) . . ? 
C71 O35 La1 123.4(4) . . ? 
C74 O36 La6 129.0(5) . . ? 
C77 O37 La5 129.6(5) . . ? 
C80 O38 La2 132.4(4) . . ? 
C83 O39 La4 128.0(5) . . ? 
C86 O40 La2 123.8(4) . . ? 
C89 O41 La3 126.3(4) . . ? 
C80 O43 La2 139.7(4) . 2_665 ? 
C32 O46 La5 153.7(4) . 2_665 ? 
La6 O1W H1WA 110.8 . . ? 
La6 O1W H1WB 111.1 . . ? 
H1WA O1W H1WB 109.3 . . ? 
La3 O2W H2WA 106.8 . . ? 
La3 O2W H2WB 107.0 . . ? 
H2WA O2W H2WB 107.0 . . ? 
La4 O3W La2 121.51(15) . . ? 
La4 O3W H3WA 135.2 . . ? 
La2 O3W H3WA 73.2 . . ? 
La4 O3W H3WB 97.6 . . ? 
La2 O3W H3WB 123.8 . . ? 
H3WA O3W H3WB 107.7 . . ? 
 
_diffrn_measured_fraction_theta_max    0.980 
_diffrn_reflns_theta_full              25.50 
_diffrn_measured_fraction_theta_full   0.980 
_refine_diff_density_max    2.422 
_refine_diff_density_min   -1.147 
_refine_diff_density_rms    0.167 

#===END

data_2Ce
_database_code_depnum_ccdc_archive 'CCDC 745286'
_audit_creation_method           SHELXL-97
_chemical_name_systematic        
;
?
;
_chemical_name_common             ? 
_chemical_melting_point           ? 
_chemical_formula_moiety          'C90 H81 Ce6 N6 O45, 3(C3 H7 N O)'
_chemical_formula_sum 
 'C99 H102 Ce6 N9 O48' 
_chemical_formula_weight          3026.62 
 
loop_ 
 _atom_type_symbol 
 _atom_type_description 
 _atom_type_scat_dispersion_real 
 _atom_type_scat_dispersion_imag 
 _atom_type_scat_source 
 'C'  'C'   0.0033   0.0016 
 'International Tables Vol C Tables 4.2.6.8 and 6.1.1.4' 
 'H'  'H'   0.0000   0.0000 
 'International Tables Vol C Tables 4.2.6.8 and 6.1.1.4' 
 'N'  'N'   0.0061   0.0033 
 'International Tables Vol C Tables 4.2.6.8 and 6.1.1.4' 
 'O'  'O'   0.0106   0.0060 
 'International Tables Vol C Tables 4.2.6.8 and 6.1.1.4' 
 'Ce'  'Ce'  -0.2486   2.6331 
 'International Tables Vol C Tables 4.2.6.8 and 6.1.1.4' 
 

_symmetry_cell_setting            'triclinic' 
_symmetry_space_group_name_H-M    'p -1'
_symmetry_space_group_name_Hall   '-p 1' 
 
loop_ 
 _symmetry_equiv_pos_as_xyz 
 'x, y, z' 
 '-x, -y, -z' 
 
_cell_length_a                    11.0987(13) 
_cell_length_b                    17.768(2) 
_cell_length_c                    29.159(3) 
_cell_angle_alpha                 86.547(2) 
_cell_angle_beta                  79.811(2) 
_cell_angle_gamma                 73.123(2) 
_cell_volume                      5415.5(11) 
_cell_formula_units_Z             2 
_cell_measurement_temperature     298(2) 
_cell_measurement_reflns_used     3365 
_cell_measurement_theta_min       2.55 
_cell_measurement_theta_max       25.58
 
_exptl_crystal_description        block
_exptl_crystal_colour             colorless
_exptl_crystal_size_max           0.26 
_exptl_crystal_size_mid           0.25 
_exptl_crystal_size_min           0.24 
_exptl_crystal_density_meas       ? 
_exptl_crystal_density_diffrn     1.856 
_exptl_crystal_density_method     'not measured' 
_exptl_crystal_F_000              2982 
_exptl_absorpt_coefficient_mu     2.568 
_exptl_absorpt_correction_type    'multi-scan'  
_exptl_absorpt_correction_T_min   0.5549 
_exptl_absorpt_correction_T_max   0.5777 
_exptl_absorpt_process_details    'SADABS(Sheldrick,2003)'
 
_exptl_special_details 
; 
 ? 
; 
 
_diffrn_ambient_temperature       298(2) 
_diffrn_radiation_wavelength      0.71073 
_diffrn_radiation_type            MoK\a 
_diffrn_radiation_source          'fine-focus sealed tube' 
_diffrn_radiation_monochromator   graphite 
_diffrn_measurement_device_type  'Bruker Smart Apex CCD area detector'
_diffrn_measurement_method       'phi and omega scans'
_diffrn_detector_area_resol_mean  ? 
_diffrn_standards_number          ? 
_diffrn_standards_interval_count  ? 
_diffrn_standards_interval_time   ? 
_diffrn_standards_decay_%         ? 
_diffrn_reflns_number             27980 
_diffrn_reflns_av_R_equivalents   0.0714 
_diffrn_reflns_av_sigmaI/netI     0.1021 
_diffrn_reflns_limit_h_min        -7 
_diffrn_reflns_limit_h_max        13 
_diffrn_reflns_limit_k_min        -21 
_diffrn_reflns_limit_k_max        21 
_diffrn_reflns_limit_l_min        -33 
_diffrn_reflns_limit_l_max        35 
_diffrn_reflns_theta_min          1.85 
_diffrn_reflns_theta_max          25.50 
_reflns_number_total              19715 
_reflns_number_gt                 13218 
_reflns_threshold_expression      >2sigma(I) 
 
_computing_data_collection        'SMART(Bruker, 2003)'
_computing_cell_refinement        'SAINTPLUS(Bruker, 2003)'
_computing_data_reduction         'SAINTPLUS'
_computing_structure_solution     'SHELXS-97 (Sheldrick, 2008)' 
_computing_structure_refinement   'SHELXL-97 (Sheldrick, 2008)' 
_computing_molecular_graphics     'SHELXTL(Bruker, 2008)' 
_computing_publication_material   'SHELXTL' 
 
_refine_special_details 
; 
 Refinement of F^2^ against ALL reflections.  The weighted R-factor wR and 
 goodness of fit S are based on F^2^, conventional R-factors R are based 
 on F, with F set to zero for negative F^2^. The threshold expression of 
 F^2^ > 2sigma(F^2^) is used only for calculating R-factors(gt) etc. and is 
 not relevant to the choice of reflections for refinement.  R-factors based 
 on F^2^ are statistically about twice as large as those based on F, and R- 
 factors based on ALL data will be even larger. 
; 
 
_refine_ls_structure_factor_coef  Fsqd  
_refine_ls_matrix_type            full 
_refine_ls_weighting_scheme       calc  
_refine_ls_weighting_details 
 'calc w=1/[\s^2^(Fo^2^)+(0.0430P)^2^+0.0000P] where P=(Fo^2^+2Fc^2^)/3' 
_atom_sites_solution_primary      direct 
_atom_sites_solution_secondary    difmap 
_atom_sites_solution_hydrogens    geom 
_refine_ls_hydrogen_treatment     constr 
_refine_ls_extinction_method      none 
_refine_ls_extinction_coef        ? 
_refine_ls_number_reflns          19715 
_refine_ls_number_parameters      1459 
_refine_ls_number_restraints      990 
_refine_ls_R_factor_all           0.0906 
_refine_ls_R_factor_gt            0.0593 
_refine_ls_wR_factor_ref          0.1377 
_refine_ls_wR_factor_gt           0.1289 
_refine_ls_goodness_of_fit_ref    1.035 
_refine_ls_restrained_S_all       1.029 
_refine_ls_shift/su_max           0.029 
_refine_ls_shift/su_mean          0.002 
 
loop_ 
 _atom_site_label 
 _atom_site_type_symbol 
 _atom_site_fract_x 
 _atom_site_fract_y 
 _atom_site_fract_z 
 _atom_site_U_iso_or_equiv 
 _atom_site_adp_type 
 _atom_site_occupancy 
 _atom_site_symmetry_multiplicity 
 _atom_site_calc_flag 
 _atom_site_refinement_flags 
 _atom_site_disorder_assembly 
 _atom_site_disorder_group 
Ce1 Ce 0.75723(5) 0.71088(3) 0.379045(15) 0.02120(13) Uani 1 1 d . . . 
Ce2 Ce 0.44003(5) 0.60986(3) 0.034675(16) 0.01895(12) Uani 1 1 d . . . 
Ce3 Ce 0.88416(5) 0.49619(3) 0.309255(16) 0.02052(13) Uani 1 1 d . . . 
Ce4 Ce 0.45414(5) 0.89022(3) 0.035684(16) 0.02124(12) Uani 1 1 d . . . 
Ce5 Ce 0.89230(5) 0.20498(3) 0.289466(16) 0.02483(13) Uani 1 1 d . . . 
Ce6 Ce 0.80215(5) 0.98700(3) 0.356697(16) 0.02385(13) Uani 1 1 d . . . 
C1 C -0.0979(8) 1.1819(5) -0.0195(3) 0.025(2) Uani 1 1 d U . . 
C2 C -0.0004(8) 1.2178(5) -0.0316(3) 0.025(2) Uani 1 1 d U . . 
H2A H -0.0139 1.2638 -0.0494 0.030 Uiso 1 1 calc R . . 
C3 C 0.1157(8) 1.1856(5) -0.0175(3) 0.030(2) Uani 1 1 d U . . 
H3A H 0.1805 1.2097 -0.0259 0.036 Uiso 1 1 calc R . . 
C4 C 0.1364(8) 1.1170(5) 0.0095(3) 0.025(2) Uani 1 1 d U . . 
C5 C 0.0392(9) 1.0821(5) 0.0220(3) 0.033(2) Uani 1 1 d U . . 
H5A H 0.0520 1.0365 0.0401 0.040 Uiso 1 1 calc R . . 
C6 C -0.0771(9) 1.1151(5) 0.0075(3) 0.033(2) Uani 1 1 d U . . 
H6A H -0.1425 1.0916 0.0163 0.039 Uiso 1 1 calc R . . 
C7 C -0.2195(8) 1.2128(5) -0.0391(3) 0.024(2) Uani 1 1 d U . . 
C8 C 0.2652(8) 1.0794(5) 0.0233(3) 0.025(2) Uani 1 1 d U . . 
C9 C 1.4364(8) -0.0800(5) 0.3486(3) 0.027(2) Uani 1 1 d U . . 
C10 C 1.4306(9) -0.0212(5) 0.3157(3) 0.032(2) Uani 1 1 d U . . 
H10A H 1.5028 -0.0047 0.3046 0.038 Uiso 1 1 calc R . . 
C11 C 1.3198(8) 0.0134(5) 0.2992(3) 0.030(2) Uani 1 1 d U . . 
H11A H 1.3172 0.0533 0.2769 0.036 Uiso 1 1 calc R . . 
C12 C 1.2098(8) -0.0103(5) 0.3154(3) 0.025(2) Uani 1 1 d U . . 
C13 C 1.2171(9) -0.0704(5) 0.3476(3) 0.031(2) Uani 1 1 d U . . 
H13A H 1.1454 -0.0876 0.3583 0.037 Uiso 1 1 calc R . . 
C14 C 1.3281(8) -0.1052(5) 0.3640(3) 0.029(2) Uani 1 1 d U . . 
H14A H 1.3315 -0.1461 0.3857 0.035 Uiso 1 1 calc R . . 
C15 C 1.5563(9) -0.1152(6) 0.3685(3) 0.030(2) Uani 1 1 d U . . 
C16 C 1.0867(9) 0.0316(5) 0.2981(3) 0.029(2) Uani 1 1 d U . . 
C17 C 1.3277(9) 0.3267(6) 0.3049(3) 0.033(2) Uani 1 1 d U . . 
H17A H 1.3081 0.3780 0.2932 0.040 Uiso 1 1 calc R . . 
C18 C 1.4464(9) 0.2921(5) 0.3171(3) 0.033(2) Uani 1 1 d U . . 
H18A H 1.5071 0.3197 0.3124 0.040 Uiso 1 1 calc R . . 
C19 C 1.4764(8) 0.2180(5) 0.3361(3) 0.027(2) Uani 1 1 d U . . 
C20 C 1.3878(9) 0.1767(6) 0.3425(3) 0.034(2) Uani 1 1 d U . . 
H20A H 1.4075 0.1263 0.3554 0.041 Uiso 1 1 calc R . . 
C21 C 1.2677(9) 0.2103(5) 0.3297(3) 0.034(2) Uani 1 1 d U . . 
H21A H 1.2077 0.1822 0.3345 0.041 Uiso 1 1 calc R . . 
C22 C 1.2373(8) 0.2848(5) 0.3100(3) 0.026(2) Uani 1 1 d U . . 
C23 C 1.6100(9) 0.1786(6) 0.3473(3) 0.030(2) Uani 1 1 d U . . 
C24 C 1.1115(8) 0.3192(5) 0.2934(3) 0.026(2) Uani 1 1 d U . . 
C25 C 0.2841(8) 0.8853(5) -0.1663(3) 0.030(2) Uani 1 1 d U . . 
H25A H 0.2531 0.8430 -0.1696 0.036 Uiso 1 1 calc R . . 
C26 C 0.3201(8) 0.8959(5) -0.1245(3) 0.029(2) Uani 1 1 d U . . 
H26A H 0.3127 0.8608 -0.1000 0.035 Uiso 1 1 calc R . . 
C27 C 0.3672(8) 0.9585(5) -0.1191(3) 0.028(2) Uani 1 1 d U . . 
C28 C 0.3778(8) 1.0104(5) -0.1559(3) 0.030(2) Uani 1 1 d U . . 
H28A H 0.4101 1.0523 -0.1530 0.035 Uiso 1 1 calc R . . 
C29 C 0.3396(8) 0.9994(5) -0.1973(3) 0.032(2) Uani 1 1 d U . . 
H29A H 0.3451 1.0350 -0.2217 0.038 Uiso 1 1 calc R . . 
C30 C 0.2939(8) 0.9371(5) -0.2028(3) 0.024(2) Uani 1 1 d U . . 
C31 C 0.4065(9) 0.9706(6) -0.0737(3) 0.031(2) Uani 1 1 d U . . 
C32 C 0.2523(8) 0.9266(5) -0.2478(3) 0.030(2) Uani 1 1 d U . . 
C33 C 0.9783(8) 0.7962(5) 0.5528(3) 0.032(2) Uani 1 1 d U . . 
H33A H 0.9662 0.7635 0.5783 0.039 Uiso 1 1 calc R . . 
C34 C 0.9425(8) 0.7849(5) 0.5105(3) 0.031(2) Uani 1 1 d U . . 
H34A H 0.9058 0.7448 0.5080 0.037 Uiso 1 1 calc R . . 
C35 C 0.9614(8) 0.8329(5) 0.4726(3) 0.0226(19) Uani 1 1 d U . . 
C36 C 1.0178(9) 0.8916(5) 0.4762(3) 0.034(2) Uani 1 1 d U . . 
H36A H 1.0323 0.9236 0.4507 0.040 Uiso 1 1 calc R . . 
C37 C 1.0529(8) 0.9027(5) 0.5180(3) 0.031(2) Uani 1 1 d U . . 
H37A H 1.0913 0.9421 0.5202 0.037 Uiso 1 1 calc R . . 
C38 C 1.0320(8) 0.8567(5) 0.5561(3) 0.026(2) Uani 1 1 d U . . 
C39 C 0.9120(8) 0.8252(5) 0.4283(3) 0.026(2) Uani 1 1 d U . . 
C40 C 1.0669(9) 0.8726(6) 0.6012(3) 0.036(2) Uani 1 1 d U . . 
C41 C 1.3557(9) 0.6744(6) 0.3505(3) 0.041(3) Uani 1 1 d U . . 
H41A H 1.3802 0.7184 0.3558 0.049 Uiso 1 1 calc R . . 
C42 C 1.2327(9) 0.6836(6) 0.3430(3) 0.034(2) Uani 1 1 d U . . 
H42A H 1.1749 0.7335 0.3433 0.040 Uiso 1 1 calc R . . 
C43 C 1.1961(8) 0.6182(5) 0.3349(3) 0.025(2) Uani 1 1 d U . . 
C44 C 1.2823(9) 0.5457(6) 0.3342(3) 0.035(2) Uani 1 1 d U . . 
H44A H 1.2587 0.5014 0.3287 0.043 Uiso 1 1 calc R . . 
C45 C 1.4037(9) 0.5380(6) 0.3418(3) 0.036(2) Uani 1 1 d U . . 
H45A H 1.4614 0.4881 0.3411 0.043 Uiso 1 1 calc R . . 
C46 C 1.4424(8) 0.6010(5) 0.3501(3) 0.025(2) Uani 1 1 d U . . 
C47 C 1.5726(9) 0.5930(6) 0.3605(3) 0.031(2) Uani 1 1 d U . . 
C48 C 1.0604(9) 0.6288(5) 0.3265(3) 0.030(2) Uani 1 1 d U . . 
C49 C 0.6265(8) 0.3389(5) 0.1403(3) 0.031(2) Uani 1 1 d U . . 
H49A H 0.5965 0.2994 0.1312 0.038 Uiso 1 1 calc R . . 
C50 C 0.6364(8) 0.3998(5) 0.1104(3) 0.0222(19) Uani 1 1 d U . . 
C51 C 0.6800(8) 0.4599(5) 0.1245(3) 0.030(2) Uani 1 1 d U . . 
H51A H 0.6847 0.5025 0.1048 0.036 Uiso 1 1 calc R . . 
C52 C 0.6606(9) 0.3352(6) 0.1842(3) 0.035(2) Uani 1 1 d U . . 
H52A H 0.6543 0.2933 0.2042 0.042 Uiso 1 1 calc R . . 
C53 C 0.6011(8) 0.4040(5) 0.0634(3) 0.025(2) Uani 1 1 d U . . 
C54 C 0.7452(8) 0.3903(5) 0.2445(3) 0.0201(19) Uani 1 1 d U . . 
C55 C 0.7160(8) 0.4555(5) 0.1680(3) 0.030(2) Uani 1 1 d U . . 
H55A H 0.7482 0.4941 0.1770 0.036 Uiso 1 1 calc R . . 
C56 C 0.7041(8) 0.3945(5) 0.1979(3) 0.025(2) Uani 1 1 d U . . 
C57 C 0.5874(8) 0.7189(5) 0.0966(3) 0.0206(19) Uani 1 1 d U . . 
C58 C 0.6264(8) 0.7143(5) 0.1433(3) 0.0217(19) Uani 1 1 d U . . 
C59 C 0.6084(8) 0.6555(5) 0.1745(3) 0.029(2) Uani 1 1 d U . . 
H59A H 0.5720 0.6187 0.1659 0.035 Uiso 1 1 calc R . . 
C60 C 0.6428(8) 0.6493(5) 0.2183(3) 0.031(2) Uani 1 1 d U . . 
H60A H 0.6331 0.6079 0.2384 0.038 Uiso 1 1 calc R . . 
C61 C 0.6927(8) 0.7073(5) 0.2315(3) 0.025(2) Uani 1 1 d U . . 
C62 C 0.7092(8) 0.7677(5) 0.2011(3) 0.029(2) Uani 1 1 d U . . 
H62A H 0.7415 0.8063 0.2100 0.035 Uiso 1 1 calc R . . 
C63 C 0.6770(8) 0.7700(5) 0.1570(3) 0.028(2) Uani 1 1 d U . . 
H63A H 0.6898 0.8099 0.1362 0.034 Uiso 1 1 calc R . . 
C64 C 0.7274(8) 0.7037(5) 0.2791(3) 0.027(2) Uani 1 1 d U . . 
C65 C 0.9833(9) 0.4357(6) 0.4803(3) 0.036(2) Uani 1 1 d U . . 
H65A H 0.9720 0.3925 0.4670 0.043 Uiso 1 1 calc R . . 
C66 C 0.9839(9) 0.5713(6) 0.4755(3) 0.039(2) Uani 1 1 d U . . 
H66A H 0.9733 0.6188 0.4592 0.046 Uiso 1 1 calc R . . 
C67 C 0.9671(8) 0.5057(5) 0.4560(3) 0.027(2) Uani 1 1 d U . . 
C68 C 0.9319(8) 0.5103(5) 0.4084(3) 0.028(2) Uani 1 1 d U . . 
C69 C 0.6265(11) 0.5230(7) 0.5361(4) 0.064(2) Uani 1 1 d U . . 
H69A H 0.6179 0.4982 0.5090 0.097 Uiso 1 1 calc R . . 
H69B H 0.5498 0.5304 0.5586 0.097 Uiso 1 1 calc R . . 
H69C H 0.6975 0.4903 0.5493 0.097 Uiso 1 1 calc R . . 
C70 C 0.6616(11) 0.6474(7) 0.5590(4) 0.064(2) Uani 1 1 d U . . 
H70A H 0.6725 0.6964 0.5459 0.096 Uiso 1 1 calc R . . 
H70B H 0.7348 0.6199 0.5728 0.096 Uiso 1 1 calc R . . 
H70C H 0.5864 0.6576 0.5825 0.096 Uiso 1 1 calc R . . 
C71 C 0.6571(11) 0.6225(7) 0.4788(4) 0.053(2) Uani 1 1 d U . . 
C72 C 0.6088(10) 0.8699(6) 0.5347(4) 0.056(2) Uani 1 1 d U . . 
H72A H 0.5914 0.8393 0.5119 0.083 Uiso 1 1 calc R . . 
H72B H 0.5333 0.8890 0.5574 0.083 Uiso 1 1 calc R . . 
H72C H 0.6762 0.8376 0.5499 0.083 Uiso 1 1 calc R . . 
C73 C 0.6781(11) 0.9884(7) 0.5415(4) 0.058(2) Uani 1 1 d U . . 
H73A H 0.7020 1.0299 0.5230 0.087 Uiso 1 1 calc R . . 
H73B H 0.7476 0.9592 0.5567 0.087 Uiso 1 1 calc R . . 
H73C H 0.6046 1.0104 0.5645 0.087 Uiso 1 1 calc R . . 
C74 C 0.6575(10) 0.9404(7) 0.4660(4) 0.0496(19) Uani 1 1 d U . . 
C75 C 0.9885(12) 0.2407(7) 0.1077(4) 0.073(2) Uani 1 1 d U . . 
H75A H 0.9637 0.1986 0.1253 0.110 Uiso 1 1 calc R . . 
H75B H 1.0625 0.2193 0.0848 0.110 Uiso 1 1 calc R . . 
H75C H 0.9198 0.2708 0.0925 0.110 Uiso 1 1 calc R . . 
C76 C 1.0594(12) 0.3567(7) 0.1179(4) 0.071(2) Uani 1 1 d U . . 
H76A H 1.0768 0.3845 0.1420 0.106 Uiso 1 1 calc R . . 
H76B H 0.9935 0.3913 0.1030 0.106 Uiso 1 1 calc R . . 
H76C H 1.1355 0.3384 0.0954 0.106 Uiso 1 1 calc R . . 
C77 C 1.0062(11) 0.2786(7) 0.1837(4) 0.059(2) Uani 1 1 d U . . 
C78 C 0.9673(8) 0.4348(5) -0.0096(3) 0.029(2) Uani 1 1 d U . . 
H78A H 0.9458 0.3903 -0.0162 0.035 Uiso 1 1 calc R . . 
C79 C 0.9112(8) 0.5728(5) 0.0018(3) 0.028(2) Uani 1 1 d U . . 
H79A H 0.8520 0.6222 0.0029 0.034 Uiso 1 1 calc R . . 
C80 C 0.7449(8) 0.5143(5) -0.0170(3) 0.0231(19) Uani 1 1 d U . . 
C81 C 0.3453(12) 0.8747(7) 0.2177(4) 0.076(2) Uani 1 1 d U . . 
H81A H 0.3691 0.9162 0.1991 0.114 Uiso 1 1 calc R . . 
H81B H 0.4150 0.8455 0.2328 0.114 Uiso 1 1 calc R . . 
H81C H 0.2720 0.8968 0.2407 0.114 Uiso 1 1 calc R . . 
C82 C 0.2759(12) 0.7607(7) 0.2125(4) 0.074(2) Uani 1 1 d U . . 
H82A H 0.2572 0.7301 0.1901 0.112 Uiso 1 1 calc R . . 
H82B H 0.2007 0.7807 0.2352 0.112 Uiso 1 1 calc R . . 
H82C H 0.3428 0.7280 0.2278 0.112 Uiso 1 1 calc R . . 
C83 C 0.3260(11) 0.8330(7) 0.1446(4) 0.065(2) Uani 1 1 d U . . 
H83A H 0.3065 0.7961 0.1281 0.077 Uiso 1 1 calc R . . 
C84 C 0.3352(10) 0.5349(6) 0.2125(4) 0.054(2) Uani 1 1 d U . . 
H84A H 0.3483 0.5839 0.2005 0.081 Uiso 1 1 calc R . . 
H84B H 0.4077 0.5052 0.2260 0.081 Uiso 1 1 calc R . . 
H84C H 0.2599 0.5450 0.2359 0.081 Uiso 1 1 calc R . . 
C85 C 0.2969(10) 0.4155(6) 0.1865(4) 0.053(2) Uani 1 1 d U . . 
H85A H 0.2881 0.3932 0.1585 0.079 Uiso 1 1 calc R . . 
H85B H 0.2199 0.4220 0.2088 0.079 Uiso 1 1 calc R . . 
H85C H 0.3674 0.3810 0.1992 0.079 Uiso 1 1 calc R . . 
C86 C 0.3358(9) 0.5177(6) 0.1322(4) 0.0445(18) Uani 1 1 d U . . 
H86A H 0.3282 0.4859 0.1093 0.053 Uiso 1 1 calc R . . 
C87 C 0.9846(10) 0.5723(6) 0.1297(3) 0.052(2) Uani 1 1 d U . . 
H87A H 0.9674 0.5246 0.1423 0.079 Uiso 1 1 calc R . . 
H87B H 1.0595 0.5598 0.1062 0.079 Uiso 1 1 calc R . . 
H87C H 0.9132 0.6038 0.1163 0.079 Uiso 1 1 calc R . . 
C88 C 1.0343(10) 0.6899(6) 0.1549(4) 0.053(2) Uani 1 1 d U . . 
H88A H 1.0466 0.7121 0.1823 0.079 Uiso 1 1 calc R . . 
H88B H 0.9647 0.7256 0.1424 0.079 Uiso 1 1 calc R . . 
H88C H 1.1108 0.6810 0.1321 0.079 Uiso 1 1 calc R . . 
C89 C 0.9894(9) 0.5913(6) 0.2104(3) 0.0420(18) Uani 1 1 d U . . 
H89A H 0.9964 0.6238 0.2330 0.050 Uiso 1 1 calc R . . 
C90 C 0.8763(8) 0.5072(5) -0.0077(3) 0.026(2) Uani 1 1 d U . . 
C91 C 0.0477(11) 1.0171(7) 0.1563(4) 0.063(2) Uani 1 1 d U . . 
H91A H 0.0598 1.0340 0.1854 0.094 Uiso 1 1 calc R . . 
H91B H -0.0161 1.0578 0.1437 0.094 Uiso 1 1 calc R . . 
H91C H 0.1267 1.0063 0.1348 0.094 Uiso 1 1 calc R . . 
C92 C -0.0142(11) 0.9167(7) 0.1223(4) 0.059(2) Uani 1 1 d U . . 
H92A H -0.0403 0.8701 0.1306 0.089 Uiso 1 1 calc R . . 
H92B H 0.0631 0.9040 0.0998 0.089 Uiso 1 1 calc R . . 
H92C H -0.0800 0.9548 0.1090 0.089 Uiso 1 1 calc R . . 
C93 C -0.0169(10) 0.9177(7) 0.2050(4) 0.056(2) Uani 1 1 d U . . 
H93A H -0.0061 0.9423 0.2306 0.067 Uiso 1 1 calc R . . 
C94 C 0.3642(12) 0.7955(7) 0.5065(4) 0.078(2) Uani 1 1 d U . . 
H94A H 0.3731 0.8121 0.5362 0.117 Uiso 1 1 calc R . . 
H94B H 0.3005 0.8359 0.4937 0.117 Uiso 1 1 calc R . . 
H94C H 0.4443 0.7861 0.4858 0.117 Uiso 1 1 calc R . . 
C95 C 0.3099(12) 0.6951(7) 0.4706(4) 0.074(2) Uani 1 1 d U . . 
H95A H 0.2844 0.6478 0.4774 0.112 Uiso 1 1 calc R . . 
H95B H 0.3890 0.6837 0.4491 0.112 Uiso 1 1 calc R . . 
H95C H 0.2452 0.7336 0.4571 0.112 Uiso 1 1 calc R . . 
C96 C 0.3019(12) 0.6939(8) 0.5531(5) 0.070(2) Uani 1 1 d U . . 
H96A H 0.3104 0.7185 0.5792 0.084 Uiso 1 1 calc R . . 
C97 C 0.6426(11) 0.8001(7) 0.8020(4) 0.058(2) Uani 1 1 d U . . 
H97A H 0.6131 0.7546 0.8100 0.087 Uiso 1 1 calc R . . 
H97B H 0.7216 0.7857 0.7805 0.087 Uiso 1 1 calc R . . 
H97C H 0.5800 0.8391 0.7878 0.087 Uiso 1 1 calc R . . 
C98 C 0.7071(11) 0.8996(7) 0.8382(4) 0.059(2) Uani 1 1 d U . . 
H98A H 0.7167 0.9155 0.8679 0.089 Uiso 1 1 calc R . . 
H98B H 0.6467 0.9415 0.8249 0.089 Uiso 1 1 calc R . . 
H98C H 0.7881 0.8877 0.8178 0.089 Uiso 1 1 calc R . . 
C99 C 0.6366(10) 0.7990(7) 0.8847(4) 0.050(2) Uani 1 1 d U . . 
H99A H 0.6488 0.8227 0.9104 0.060 Uiso 1 1 calc R . . 
N1 N 0.6483(9) 0.6000(6) 0.5228(3) 0.0566(19) Uani 1 1 d U . . 
N2 N 0.6477(8) 0.9363(5) 0.5117(3) 0.0456(17) Uani 1 1 d U . . 
N3 N 1.0174(9) 0.2900(6) 0.1381(3) 0.0587(19) Uani 1 1 d U . . 
N4 N 0.0081(8) 0.9491(5) 0.1636(3) 0.0530(18) Uani 1 1 d U . . 
N5 N 0.3161(9) 0.8250(6) 0.1893(3) 0.059(2) Uani 1 1 d U . . 
N6 N 0.3200(8) 0.4914(5) 0.1758(3) 0.0456(17) Uani 1 1 d U . . 
N7 N 1.0057(8) 0.6159(5) 0.1669(3) 0.0435(16) Uani 1 1 d U . . 
N8 N 0.3264(9) 0.7249(6) 0.5125(4) 0.067(2) Uani 1 1 d U . . 
N9 N 0.6627(8) 0.8321(5) 0.8440(3) 0.0519(18) Uani 1 1 d U . . 
O1 O -0.2809(6) 1.1648(4) -0.0418(2) 0.0423(17) Uani 1 1 d U . . 
O2 O -0.2497(6) 1.2814(4) -0.0540(2) 0.0315(15) Uani 1 1 d U . . 
O3 O 0.3468(6) 1.1170(4) 0.0144(2) 0.0391(17) Uani 1 1 d U . . 
O4 O 0.2818(6) 1.0149(4) 0.0441(2) 0.0414(17) Uani 1 1 d U . . 
O5 O 1.5687(6) -0.1762(4) 0.3928(2) 0.0361(16) Uani 1 1 d U . . 
O6 O 1.6406(7) -0.0806(4) 0.3609(2) 0.0481(19) Uani 1 1 d U . . 
O7 O 0.9965(6) 0.0042(4) 0.3102(2) 0.0440(18) Uani 1 1 d U . . 
O8 O 1.0831(6) 0.0907(4) 0.2729(2) 0.0427(17) Uani 1 1 d U . . 
O9 O 1.6290(6) 0.1107(4) 0.3640(2) 0.0456(18) Uani 1 1 d U . . 
O10 O 1.6889(6) 0.2169(4) 0.3402(2) 0.0394(17) Uani 1 1 d U . . 
O11 O 1.0768(6) 0.3899(4) 0.28581(19) 0.0310(15) Uani 1 1 d U . . 
O12 O 1.0540(6) 0.2700(4) 0.2861(2) 0.0394(17) Uani 1 1 d U . . 
O14 O 0.2588(6) 0.9769(4) -0.2790(2) 0.0405(17) Uani 1 1 d U . . 
O15 O 0.4475(6) 1.0267(4) -0.0706(2) 0.0400(17) Uani 1 1 d U . . 
O16 O 0.3950(6) 0.9212(4) -0.0417(2) 0.0422(17) Uani 1 1 d U . . 
O17 O 1.1124(6) 0.9290(4) 0.6014(2) 0.0464(18) Uani 1 1 d U . . 
O18 O 1.0473(6) 0.8291(4) 0.6351(2) 0.0431(17) Uani 1 1 d U . . 
O19 O 0.9275(6) 0.8737(4) 0.3968(2) 0.0382(16) Uani 1 1 d U . . 
O20 O 0.8618(6) 0.7725(4) 0.4266(2) 0.0371(16) Uani 1 1 d U . . 
O21 O 1.6566(6) 0.5302(4) 0.3496(2) 0.0406(17) Uani 1 1 d U . . 
O22 O 1.5893(6) 0.6486(4) 0.3799(2) 0.0382(16) Uani 1 1 d U . . 
O23 O 0.9754(6) 0.6908(4) 0.3359(2) 0.0351(16) Uani 1 1 d U . . 
O24 O 1.0458(6) 0.5671(4) 0.3096(2) 0.0358(16) Uani 1 1 d U . . 
O25 O 0.6278(6) 0.3407(4) 0.0417(2) 0.0350(16) Uani 1 1 d U . . 
O26 O 0.5473(5) 0.4686(3) 0.04620(19) 0.0286(14) Uani 1 1 d U . . 
O27 O 0.7471(6) 0.3299(4) 0.2689(2) 0.0332(15) Uani 1 1 d U . . 
O28 O 0.7755(6) 0.4469(4) 0.2565(2) 0.0354(16) Uani 1 1 d U . . 
O29 O 0.5461(6) 0.6653(4) 0.0856(2) 0.0337(15) Uani 1 1 d U . . 
O30 O 0.5964(6) 0.7773(4) 0.0713(2) 0.0318(15) Uani 1 1 d U . . 
O31 O 0.7110(6) 0.7663(4) 0.2994(2) 0.0389(16) Uani 1 1 d U . . 
O32 O 0.7713(5) 0.6374(3) 0.29823(19) 0.0286(14) Uani 1 1 d U . . 
O33 O 0.9679(6) 0.4496(4) 0.3845(2) 0.0420(17) Uani 1 1 d U . . 
O34 O 0.8703(6) 0.5760(4) 0.39338(19) 0.0315(15) Uani 1 1 d U . . 
O35 O 0.6761(6) 0.6846(4) 0.4643(2) 0.0442(18) Uani 1 1 d U . . 
O36 O 0.6936(7) 0.9927(4) 0.4438(2) 0.055(2) Uani 1 1 d U . . 
O37 O 0.9701(7) 0.2242(4) 0.2033(2) 0.0498(19) Uani 1 1 d U . . 
O38 O 0.6609(6) 0.5769(4) -0.0070(2) 0.0326(15) Uani 1 1 d U . . 
O39 O 0.3603(7) 0.8875(4) 0.1225(2) 0.053(2) Uani 1 1 d U . . 
O40 O 0.3593(6) 0.5793(4) 0.1190(2) 0.0371(16) Uani 1 1 d U . . 
O41 O 0.9660(6) 0.5298(4) 0.2239(2) 0.0373(16) Uani 1 1 d U . . 
O43 O 0.7299(6) 0.4557(4) -0.0345(2) 0.0323(15) Uani 1 1 d U . . 
O44 O -0.0527(8) 0.8594(5) 0.2123(3) 0.071(2) Uani 1 1 d U . . 
O45 O 0.2674(8) 0.6322(5) 0.5591(3) 0.080(3) Uani 1 1 d U . . 
O46 O 0.2107(6) 0.8700(4) -0.2509(2) 0.0403(17) Uani 1 1 d U . . 
O47 O 0.5981(7) 0.7409(5) 0.8928(3) 0.059(2) Uani 1 1 d U . . 
O1W O 0.8942(7) 0.8712(5) 0.3071(3) 0.067(2) Uani 1 1 d U . . 
H1WA H 0.9752 0.8580 0.3034 0.081 Uiso 1 1 d R . . 
H1WB H 0.8703 0.8797 0.2807 0.081 Uiso 1 1 d R . . 
O2W O 0.8133(5) 0.3784(3) 0.34735(18) 0.0257(14) Uani 1 1 d U . . 
H2WA H 0.7323 0.3937 0.3542 0.031 Uiso 1 1 d R . . 
H2WB H 0.8420 0.3685 0.3729 0.031 Uiso 1 1 d R . . 
H3WA H 0.5902 0.7048 -0.0137 0.031 Uiso 1 1 d R . . 
H3WB H 0.5080 0.7610 -0.0367 0.031 Uiso 1 1 d R . . 
O3W O 0.5208(6) 0.7449(4) -0.0084(2) 0.0420(17) Uani 1 1 d U . . 
 
loop_ 
 _atom_site_aniso_label 
 _atom_site_aniso_U_11 
 _atom_site_aniso_U_22 
 _atom_site_aniso_U_33 
 _atom_site_aniso_U_23 
 _atom_site_aniso_U_13 
 _atom_site_aniso_U_12 
Ce1 0.0194(3) 0.0286(3) 0.0170(2) -0.0064(2) -0.0064(2) -0.0058(2) 
Ce2 0.0171(3) 0.0239(3) 0.0172(2) -0.0048(2) -0.00535(19) -0.0055(2) 
Ce3 0.0211(3) 0.0244(3) 0.0184(3) -0.0030(2) -0.0065(2) -0.0075(2) 
Ce4 0.0217(3) 0.0280(3) 0.0181(2) 0.0043(2) -0.0088(2) -0.0111(2) 
Ce5 0.0234(3) 0.0370(3) 0.0182(3) 0.0051(2) -0.0086(2) -0.0129(2) 
Ce6 0.0239(3) 0.0314(3) 0.0195(3) 0.0028(2) -0.0077(2) -0.0113(2) 
C1 0.025(3) 0.025(3) 0.025(3) -0.0009(18) -0.0036(18) -0.0071(18) 
C2 0.026(3) 0.024(3) 0.026(3) 0.0005(18) -0.0045(18) -0.0066(18) 
C3 0.029(3) 0.030(3) 0.031(3) -0.0017(18) -0.0047(18) -0.0103(19) 
C4 0.025(3) 0.026(3) 0.024(3) -0.0002(18) -0.0037(18) -0.0061(18) 
C5 0.033(3) 0.032(3) 0.034(3) 0.0010(18) -0.0066(19) -0.0099(19) 
C6 0.032(3) 0.034(3) 0.033(3) 0.0007(18) -0.0048(19) -0.0111(19) 
C7 0.023(3) 0.026(3) 0.023(3) -0.0018(18) -0.0042(18) -0.0064(18) 
C8 0.026(3) 0.026(3) 0.025(3) -0.0028(18) -0.0052(18) -0.0076(19) 
C9 0.027(3) 0.027(3) 0.026(3) -0.0018(18) -0.0041(18) -0.0066(19) 
C10 0.031(3) 0.033(3) 0.033(3) -0.0005(18) -0.0045(18) -0.0101(19) 
C11 0.031(3) 0.030(3) 0.030(3) 0.0010(18) -0.0052(18) -0.0094(19) 
C12 0.025(3) 0.026(3) 0.024(3) -0.0018(18) -0.0039(18) -0.0073(18) 
C13 0.029(3) 0.031(3) 0.032(3) 0.0004(18) -0.0045(18) -0.0102(19) 
C14 0.029(3) 0.030(3) 0.031(3) 0.0008(18) -0.0046(18) -0.0102(19) 
C15 0.029(3) 0.031(3) 0.030(3) -0.0019(18) -0.0041(18) -0.0089(19) 
C16 0.029(3) 0.030(3) 0.029(3) -0.0029(18) -0.0037(18) -0.0095(19) 
C17 0.033(3) 0.032(3) 0.034(3) 0.0002(18) -0.0057(19) -0.0093(19) 
C18 0.033(3) 0.034(3) 0.034(3) -0.0013(18) -0.0052(19) -0.0107(19) 
C19 0.028(3) 0.028(3) 0.026(3) -0.0006(18) -0.0032(18) -0.0066(19) 
C20 0.034(3) 0.034(3) 0.034(3) 0.0002(18) -0.0065(19) -0.0099(19) 
C21 0.034(3) 0.034(3) 0.036(3) -0.0002(19) -0.0061(19) -0.0101(19) 
C22 0.026(3) 0.025(3) 0.025(3) 0.0002(18) -0.0031(18) -0.0062(18) 
C23 0.030(3) 0.031(3) 0.028(3) -0.0014(18) -0.0051(18) -0.0073(19) 
C24 0.026(3) 0.027(3) 0.025(3) -0.0009(18) -0.0042(18) -0.0074(19) 
C25 0.031(3) 0.030(3) 0.030(3) -0.0007(18) -0.0061(18) -0.0097(19) 
C26 0.030(3) 0.030(3) 0.028(3) 0.0009(18) -0.0064(18) -0.0090(19) 
C27 0.027(3) 0.029(3) 0.028(3) -0.0016(18) -0.0063(18) -0.0066(19) 
C28 0.031(3) 0.029(3) 0.030(3) -0.0001(18) -0.0059(18) -0.0104(19) 
C29 0.033(3) 0.032(3) 0.030(3) 0.0010(18) -0.0055(18) -0.0092(19) 
C30 0.025(3) 0.025(3) 0.024(3) -0.0021(18) -0.0049(18) -0.0071(18) 
C31 0.031(3) 0.032(3) 0.031(3) -0.0019(18) -0.0071(19) -0.0083(19) 
C32 0.029(3) 0.031(3) 0.030(3) -0.0011(18) -0.0059(18) -0.0083(19) 
C33 0.033(3) 0.033(3) 0.031(3) 0.0003(18) -0.0061(19) -0.0097(19) 
C34 0.032(3) 0.031(3) 0.031(3) -0.0018(18) -0.0067(18) -0.0108(19) 
C35 0.023(3) 0.023(3) 0.022(2) -0.0023(18) -0.0044(18) -0.0058(18) 
C36 0.034(3) 0.034(3) 0.034(3) -0.0007(18) -0.0063(19) -0.0114(19) 
C37 0.032(3) 0.030(3) 0.032(3) -0.0025(18) -0.0064(19) -0.0106(19) 
C38 0.026(3) 0.028(3) 0.026(3) -0.0028(18) -0.0063(18) -0.0068(18) 
C39 0.025(3) 0.027(3) 0.026(3) -0.0025(18) -0.0049(18) -0.0057(19) 
C40 0.035(3) 0.037(3) 0.036(3) -0.0017(19) -0.0074(19) -0.0103(19) 
C41 0.040(3) 0.041(3) 0.043(3) -0.0020(19) -0.0074(19) -0.014(2) 
C42 0.032(3) 0.034(3) 0.036(3) -0.0015(19) -0.0060(19) -0.0099(19) 
C43 0.025(3) 0.027(3) 0.025(3) -0.0022(18) -0.0044(18) -0.0083(18) 
C44 0.036(3) 0.036(3) 0.036(3) -0.0021(19) -0.0074(19) -0.0115(19) 
C45 0.035(3) 0.036(3) 0.037(3) -0.0022(19) -0.0069(19) -0.0098(19) 
C46 0.024(3) 0.026(3) 0.025(3) -0.0018(18) -0.0034(18) -0.0089(18) 
C47 0.030(3) 0.031(3) 0.031(3) -0.0013(18) -0.0048(18) -0.0094(19) 
C48 0.030(3) 0.030(3) 0.029(3) -0.0007(18) -0.0045(18) -0.0098(19) 
C49 0.033(3) 0.032(3) 0.031(3) -0.0030(18) -0.0079(19) -0.0109(19) 
C50 0.023(3) 0.022(3) 0.022(2) -0.0011(18) -0.0054(18) -0.0056(18) 
C51 0.031(3) 0.030(3) 0.030(3) 0.0018(18) -0.0070(18) -0.0093(19) 
C52 0.037(3) 0.036(3) 0.034(3) -0.0002(19) -0.0067(19) -0.0105(19) 
C53 0.025(3) 0.025(3) 0.024(3) -0.0011(18) -0.0042(18) -0.0077(18) 
C54 0.020(2) 0.020(2) 0.022(2) -0.0013(18) -0.0059(18) -0.0066(18) 
C55 0.031(3) 0.030(3) 0.031(3) -0.0016(18) -0.0067(18) -0.0101(19) 
C56 0.025(3) 0.026(3) 0.025(3) -0.0016(18) -0.0050(18) -0.0074(18) 
C57 0.021(2) 0.021(3) 0.020(2) -0.0013(18) -0.0051(18) -0.0044(18) 
C58 0.022(2) 0.022(3) 0.021(2) -0.0009(18) -0.0049(18) -0.0058(18) 
C59 0.030(3) 0.030(3) 0.030(3) -0.0006(18) -0.0065(18) -0.0099(19) 
C60 0.032(3) 0.032(3) 0.031(3) 0.0008(18) -0.0061(18) -0.0101(19) 
C61 0.025(3) 0.025(3) 0.023(3) -0.0011(18) -0.0050(18) -0.0058(18) 
C62 0.031(3) 0.029(3) 0.030(3) -0.0018(18) -0.0063(18) -0.0095(19) 
C63 0.030(3) 0.029(3) 0.027(3) 0.0004(18) -0.0061(18) -0.0086(19) 
C64 0.028(3) 0.027(3) 0.027(3) -0.0003(18) -0.0056(18) -0.0079(19) 
C65 0.038(3) 0.037(3) 0.034(3) -0.0011(19) -0.0101(19) -0.0093(19) 
C66 0.040(3) 0.039(3) 0.037(3) -0.0003(19) -0.0093(19) -0.0103(19) 
C67 0.026(3) 0.028(3) 0.026(3) -0.0013(18) -0.0058(18) -0.0070(19) 
C68 0.028(3) 0.029(3) 0.026(3) 0.0001(18) -0.0063(18) -0.0072(19) 
C69 0.066(3) 0.062(2) 0.065(3) 0.0048(17) -0.0074(19) -0.020(2) 
C70 0.066(3) 0.066(3) 0.060(3) -0.0019(18) -0.012(2) -0.018(2) 
C71 0.051(3) 0.053(3) 0.055(2) -0.0003(17) -0.0079(19) -0.0142(19) 
C72 0.056(3) 0.055(2) 0.055(3) 0.0032(17) -0.0062(18) -0.017(2) 
C73 0.060(3) 0.059(3) 0.058(3) -0.0057(18) -0.011(2) -0.018(2) 
C74 0.049(3) 0.051(3) 0.048(2) 0.0007(16) -0.0074(18) -0.0126(19) 
C75 0.076(3) 0.074(3) 0.070(3) -0.0053(19) -0.014(2) -0.021(2) 
C76 0.071(3) 0.069(3) 0.070(3) 0.0068(18) -0.0075(19) -0.022(2) 
C77 0.056(3) 0.059(3) 0.059(2) 0.0011(17) -0.0079(19) -0.0142(19) 
C78 0.029(3) 0.030(3) 0.030(3) -0.0023(18) -0.0046(18) -0.0103(19) 
C79 0.027(3) 0.029(3) 0.030(3) -0.0014(18) -0.0057(18) -0.0079(19) 
C80 0.023(3) 0.024(3) 0.024(3) -0.0005(18) -0.0041(18) -0.0082(18) 
C81 0.078(3) 0.077(3) 0.074(3) -0.0063(19) -0.015(2) -0.023(2) 
C82 0.074(3) 0.073(3) 0.075(3) 0.0061(18) -0.0075(19) -0.024(2) 
C83 0.064(3) 0.065(3) 0.063(2) 0.0002(17) -0.0097(19) -0.017(2) 
C84 0.056(3) 0.056(3) 0.050(2) -0.0027(18) -0.009(2) -0.0157(19) 
C85 0.053(3) 0.051(2) 0.053(3) 0.0031(16) -0.0054(19) -0.017(2) 
C86 0.042(3) 0.045(3) 0.045(2) -0.0002(17) -0.0064(18) -0.0116(19) 
C87 0.055(3) 0.054(3) 0.047(2) -0.0025(18) -0.0090(19) -0.0143(19) 
C88 0.054(3) 0.051(2) 0.054(3) 0.0044(16) -0.0043(18) -0.018(2) 
C89 0.041(3) 0.042(3) 0.0423(19) -0.0005(17) -0.0060(18) -0.0103(19) 
C90 0.025(3) 0.028(3) 0.026(3) -0.0009(18) -0.0029(18) -0.0088(19) 
C91 0.063(3) 0.061(3) 0.066(3) -0.0012(17) -0.0080(19) -0.022(2) 
C92 0.060(3) 0.061(3) 0.057(2) -0.0027(18) -0.011(2) -0.0160(19) 
C93 0.056(3) 0.057(3) 0.055(2) -0.0026(18) -0.0092(18) -0.0152(19) 
C94 0.077(3) 0.075(3) 0.082(3) 0.0004(17) -0.0095(19) -0.026(2) 
C95 0.075(3) 0.076(3) 0.071(3) -0.0013(18) -0.013(2) -0.019(2) 
C96 0.070(3) 0.071(3) 0.069(2) -0.0005(18) -0.0108(19) -0.020(2) 
C97 0.061(3) 0.060(3) 0.054(2) -0.0023(18) -0.011(2) -0.0158(19) 
C98 0.059(3) 0.058(3) 0.061(3) -0.0005(17) -0.0065(18) -0.020(2) 
C99 0.048(3) 0.050(3) 0.051(2) -0.0033(17) -0.0093(18) -0.0140(19) 
N1 0.057(3) 0.056(2) 0.055(2) 0.0011(15) -0.0076(18) -0.0146(19) 
N2 0.043(3) 0.047(2) 0.045(2) -0.0003(15) -0.0062(17) -0.0104(18) 
N3 0.057(3) 0.059(3) 0.058(2) 0.0016(16) -0.0078(18) -0.0137(18) 
N4 0.051(3) 0.053(2) 0.054(2) -0.0024(16) -0.0084(18) -0.0129(18) 
N5 0.056(3) 0.060(3) 0.059(2) 0.0008(16) -0.0082(18) -0.0131(19) 
N6 0.044(3) 0.046(2) 0.045(2) 0.0003(15) -0.0053(18) -0.0116(18) 
N7 0.042(2) 0.044(2) 0.042(2) 0.0019(15) -0.0052(17) -0.0119(18) 
N8 0.064(3) 0.067(3) 0.068(2) -0.0002(16) -0.0096(18) -0.0172(19) 
N9 0.051(3) 0.052(2) 0.052(2) -0.0013(16) -0.0081(18) -0.0138(18) 
O1 0.040(2) 0.043(2) 0.045(2) 0.0013(17) -0.0084(17) -0.0136(18) 
O2 0.030(2) 0.033(2) 0.031(2) -0.0015(17) -0.0053(16) -0.0073(17) 
O3 0.038(2) 0.043(2) 0.038(2) -0.0014(17) -0.0093(17) -0.0117(17) 
O4 0.040(2) 0.042(2) 0.042(2) -0.0013(17) -0.0095(17) -0.0094(17) 
O5 0.034(2) 0.037(2) 0.035(2) -0.0018(17) -0.0064(17) -0.0062(17) 
O6 0.046(2) 0.051(3) 0.052(2) 0.0011(18) -0.0108(18) -0.0190(18) 
O7 0.041(2) 0.049(2) 0.044(2) -0.0004(18) -0.0064(17) -0.0146(18) 
O8 0.043(2) 0.043(2) 0.041(2) -0.0014(17) -0.0090(17) -0.0085(17) 
O9 0.044(2) 0.045(2) 0.046(2) 0.0006(18) -0.0090(18) -0.0101(18) 
O10 0.038(2) 0.042(2) 0.038(2) 0.0015(17) -0.0059(17) -0.0122(17) 
O11 0.030(2) 0.031(2) 0.030(2) 0.0011(17) -0.0036(16) -0.0064(17) 
O12 0.039(2) 0.041(2) 0.041(2) -0.0012(17) -0.0083(17) -0.0133(17) 
O14 0.041(2) 0.043(2) 0.038(2) 0.0014(17) -0.0115(17) -0.0102(17) 
O15 0.041(2) 0.041(2) 0.041(2) -0.0037(17) -0.0104(17) -0.0132(18) 
O16 0.042(2) 0.045(2) 0.040(2) 0.0009(17) -0.0114(17) -0.0119(18) 
O17 0.048(2) 0.048(2) 0.046(2) -0.0055(18) -0.0118(18) -0.0154(18) 
O18 0.042(2) 0.046(2) 0.041(2) 0.0012(17) -0.0092(17) -0.0114(18) 
O19 0.040(2) 0.039(2) 0.036(2) -0.0009(17) -0.0088(17) -0.0086(17) 
O20 0.038(2) 0.040(2) 0.036(2) -0.0062(17) -0.0111(17) -0.0128(17) 
O21 0.037(2) 0.041(2) 0.044(2) -0.0015(17) -0.0043(17) -0.0127(17) 
O22 0.037(2) 0.041(2) 0.040(2) -0.0041(17) -0.0073(17) -0.0150(17) 
O23 0.034(2) 0.036(2) 0.036(2) -0.0045(17) -0.0078(17) -0.0090(17) 
O24 0.034(2) 0.038(2) 0.038(2) -0.0043(17) -0.0066(17) -0.0141(17) 
O25 0.039(2) 0.033(2) 0.033(2) -0.0034(17) -0.0088(17) -0.0083(17) 
O26 0.029(2) 0.031(2) 0.026(2) -0.0013(16) -0.0066(16) -0.0067(16) 
O27 0.035(2) 0.034(2) 0.033(2) -0.0018(17) -0.0079(17) -0.0120(17) 
O28 0.039(2) 0.037(2) 0.034(2) -0.0016(17) -0.0120(17) -0.0125(17) 
O29 0.036(2) 0.035(2) 0.033(2) -0.0023(17) -0.0104(17) -0.0117(17) 
O30 0.033(2) 0.033(2) 0.030(2) 0.0004(17) -0.0098(17) -0.0098(17) 
O31 0.043(2) 0.038(2) 0.036(2) -0.0043(17) -0.0107(17) -0.0087(17) 
O32 0.029(2) 0.029(2) 0.028(2) 0.0001(16) -0.0076(16) -0.0064(16) 
O33 0.045(2) 0.041(2) 0.040(2) -0.0025(17) -0.0125(17) -0.0082(17) 
O34 0.032(2) 0.033(2) 0.028(2) -0.0011(17) -0.0059(16) -0.0071(17) 
O35 0.045(2) 0.046(2) 0.041(2) -0.0016(17) -0.0066(17) -0.0121(18) 
O36 0.054(3) 0.054(3) 0.053(3) 0.0038(18) -0.0052(18) -0.0113(18) 
O37 0.049(2) 0.051(3) 0.048(2) -0.0002(18) -0.0059(18) -0.0131(18) 
O38 0.029(2) 0.033(2) 0.036(2) -0.0025(17) -0.0044(17) -0.0089(17) 
O39 0.053(3) 0.054(3) 0.051(3) 0.0033(18) -0.0051(18) -0.0144(18) 
O40 0.038(2) 0.037(2) 0.036(2) 0.0004(17) -0.0037(17) -0.0125(17) 
O41 0.038(2) 0.038(2) 0.036(2) -0.0001(17) -0.0038(17) -0.0122(17) 
O43 0.030(2) 0.035(2) 0.034(2) -0.0045(17) -0.0066(17) -0.0119(17) 
O44 0.073(3) 0.071(3) 0.069(3) -0.0013(19) -0.0108(19) -0.0193(19) 
O45 0.083(3) 0.080(3) 0.078(3) -0.0013(19) -0.0119(19) -0.024(2) 
O46 0.042(2) 0.042(2) 0.040(2) -0.0044(17) -0.0121(17) -0.0132(18) 
O47 0.061(3) 0.059(3) 0.057(3) -0.0016(18) -0.0082(18) -0.0180(19) 
O1W 0.070(3) 0.072(3) 0.063(3) 0.0004(19) -0.0163(19) -0.0225(19) 
O2W 0.026(2) 0.034(2) 0.022(2) 0.0059(16) -0.0109(16) -0.0122(16) 
O3W 0.043(2) 0.042(2) 0.041(2) -0.0016(17) -0.0097(17) -0.0090(17) 
 
_geom_special_details 
; 
 All esds (except the esd in the dihedral angle between two l.s. planes) 
 are estimated using the full covariance matrix.  The cell esds are taken 
 into account individually in the estimation of esds in distances, angles 
 and torsion angles; correlations between esds in cell parameters are only 
 used when they are defined by crystal symmetry.  An approximate (isotropic) 
 treatment of cell esds is used for estimating esds involving l.s. planes. 
; 
 
loop_ 
 _geom_bond_atom_site_label_1 
 _geom_bond_atom_site_label_2 
 _geom_bond_distance 
 _geom_bond_site_symmetry_2 
 _geom_bond_publ_flag 
Ce1 O34 2.411(6) . ? 
Ce1 O22 2.425(6) 1_455 ? 
Ce1 O5 2.434(6) 1_465 ? 
Ce1 O20 2.441(6) . ? 
Ce1 O23 2.459(6) . ? 
Ce1 O31 2.546(6) . ? 
Ce1 O35 2.554(6) . ? 
Ce1 O32 2.722(5) . ? 
Ce1 C64 3.006(8) . ? 
Ce2 O2 2.420(6) 2_575 ? 
Ce2 O29 2.455(6) . ? 
Ce2 O38 2.455(6) . ? 
Ce2 O26 2.477(6) . ? 
Ce2 O43 2.488(6) 2_665 ? 
Ce2 O25 2.505(6) 2_665 ? 
Ce2 O40 2.548(6) . ? 
Ce2 O26 2.773(5) 2_665 ? 
Ce2 O3W 2.937(6) . ? 
Ce2 C53 3.010(8) 2_665 ? 
Ce3 O11 2.429(6) . ? 
Ce3 O28 2.454(6) . ? 
Ce3 O24 2.476(6) . ? 
Ce3 O32 2.487(6) . ? 
Ce3 O21 2.505(6) 1_455 ? 
Ce3 O33 2.532(6) . ? 
Ce3 O2W 2.569(5) . ? 
Ce3 O41 2.591(6) . ? 
Ce3 O34 2.865(6) . ? 
Ce3 C68 3.066(8) . ? 
Ce4 O1 2.374(6) 2_575 ? 
Ce4 O3 2.398(6) 2_675 ? 
Ce4 O15 2.431(6) 2_675 ? 
Ce4 O16 2.448(6) . ? 
Ce4 O4 2.463(7) . ? 
Ce4 O30 2.467(6) . ? 
Ce4 O39 2.564(7) . ? 
Ce4 O3W 2.796(6) . ? 
Ce5 O12 2.386(6) . ? 
Ce5 O18 2.404(6) 2_766 ? 
Ce5 O46 2.421(6) 2_665 ? 
Ce5 O10 2.431(6) 1_455 ? 
Ce5 O27 2.447(6) . ? 
Ce5 O8 2.470(7) . ? 
Ce5 O37 2.543(7) . ? 
Ce6 O6 2.414(7) 1_465 ? 
Ce6 O7 2.425(7) 1_565 ? 
Ce6 O1W 2.445(8) . ? 
Ce6 O19 2.454(6) . ? 
Ce6 O9 2.456(7) 1_465 ? 
Ce6 O17 2.464(6) 2_776 ? 
Ce6 O14 2.472(6) 2_675 ? 
Ce6 O36 2.605(7) . ? 
C1 C6 1.369(11) . ? 
C1 C2 1.392(11) . ? 
C1 C7 1.502(11) . ? 
C2 C3 1.374(11) . ? 
C2 H2A 0.9300 . ? 
C3 C4 1.394(11) . ? 
C3 H3A 0.9300 . ? 
C4 C5 1.379(11) . ? 
C4 C8 1.506(11) . ? 
C5 C6 1.383(12) . ? 
C5 H5A 0.9300 . ? 
C6 H6A 0.9300 . ? 
C7 O2 1.238(10) . ? 
C7 O1 1.250(10) . ? 
C8 O4 1.243(10) . ? 
C8 O3 1.258(10) . ? 
C9 C10 1.371(11) . ? 
C9 C14 1.395(11) . ? 
C9 C15 1.499(12) . ? 
C10 C11 1.363(11) . ? 
C10 H10A 0.9300 . ? 
C11 C12 1.401(11) . ? 
C11 H11A 0.9300 . ? 
C12 C13 1.373(11) . ? 
C12 C16 1.510(12) . ? 
C13 C14 1.365(11) . ? 
C13 H13A 0.9300 . ? 
C14 H14A 0.9300 . ? 
C15 O6 1.244(10) . ? 
C15 O5 1.246(10) . ? 
C16 O7 1.226(10) . ? 
C16 O8 1.240(10) . ? 
C17 C18 1.383(12) . ? 
C17 C22 1.397(12) . ? 
C17 H17A 0.9300 . ? 
C18 C19 1.370(12) . ? 
C18 H18A 0.9300 . ? 
C19 C20 1.370(12) . ? 
C19 C23 1.527(12) . ? 
C20 C21 1.400(12) . ? 
C20 H20A 0.9300 . ? 
C21 C22 1.385(12) . ? 
C21 H21A 0.9300 . ? 
C22 C24 1.505(11) . ? 
C23 O10 1.239(10) . ? 
C23 O9 1.247(10) . ? 
C24 O11 1.221(10) . ? 
C24 O12 1.269(10) . ? 
C25 C30 1.376(11) . ? 
C25 C26 1.386(11) . ? 
C25 H25A 0.9300 . ? 
C26 C27 1.387(11) . ? 
C26 H26A 0.9300 . ? 
C27 C28 1.384(11) . ? 
C27 C31 1.510(11) . ? 
C28 C29 1.389(11) . ? 
C28 H28A 0.9300 . ? 
C29 C30 1.372(11) . ? 
C29 H29A 0.9300 . ? 
C30 C32 1.504(11) . ? 
C31 O15 1.225(10) . ? 
C31 O16 1.258(10) . ? 
C32 O46 1.237(10) . ? 
C32 O14 1.246(10) . ? 
C33 C38 1.387(11) . ? 
C33 C34 1.402(11) . ? 
C33 H33A 0.9300 . ? 
C34 C35 1.379(11) . ? 
C34 H34A 0.9300 . ? 
C35 C36 1.381(11) . ? 
C35 C39 1.518(11) . ? 
C36 C37 1.383(11) . ? 
C36 H36A 0.9300 . ? 
C37 C38 1.365(11) . ? 
C37 H37A 0.9300 . ? 
C38 C40 1.501(11) . ? 
C39 O20 1.228(10) . ? 
C39 O19 1.244(10) . ? 
C40 O18 1.246(10) . ? 
C40 O17 1.246(10) . ? 
C41 C46 1.377(12) . ? 
C41 C42 1.382(12) . ? 
C41 H41A 0.9300 . ? 
C42 C43 1.382(12) . ? 
C42 H42A 0.9300 . ? 
C43 C44 1.362(12) . ? 
C43 C48 1.525(11) . ? 
C44 C45 1.370(11) . ? 
C44 H44A 0.9300 . ? 
C45 C46 1.359(11) . ? 
C45 H45A 0.9300 . ? 
C46 C47 1.493(11) . ? 
C47 O22 1.241(10) . ? 
C47 O21 1.246(10) . ? 
C48 O23 1.233(10) . ? 
C48 O24 1.290(10) . ? 
C49 C50 1.366(11) . ? 
C49 C52 1.390(11) . ? 
C49 H49A 0.9300 . ? 
C50 C51 1.402(11) . ? 
C50 C53 1.481(11) . ? 
C51 C55 1.389(11) . ? 
C51 H51A 0.9300 . ? 
C52 C56 1.384(12) . ? 
C52 H52A 0.9300 . ? 
C53 O26 1.252(10) . ? 
C53 O25 1.256(10) . ? 
C53 Ce2 3.010(8) 2_665 ? 
C54 O28 1.235(9) . ? 
C54 O27 1.249(9) . ? 
C54 C56 1.499(10) . ? 
C55 C56 1.370(11) . ? 
C55 H55A 0.9300 . ? 
C57 O29 1.250(9) . ? 
C57 O30 1.255(9) . ? 
C57 C58 1.492(10) . ? 
C58 C63 1.378(11) . ? 
C58 C59 1.379(11) . ? 
C59 C60 1.385(11) . ? 
C59 H59A 0.9300 . ? 
C60 C61 1.404(11) . ? 
C60 H60A 0.9300 . ? 
C61 C62 1.384(11) . ? 
C61 C64 1.497(11) . ? 
C62 C63 1.390(11) . ? 
C62 H62A 0.9300 . ? 
C63 H63A 0.9300 . ? 
C64 O31 1.243(10) . ? 
C64 O32 1.274(10) . ? 
C65 C67 1.376(12) . ? 
C65 C66 1.388(12) 2_766 ? 
C65 H65A 0.9300 . ? 
C66 C65 1.388(12) 2_766 ? 
C66 C67 1.401(12) . ? 
C66 H66A 0.9300 . ? 
C67 C68 1.499(11) . ? 
C68 O33 1.245(10) . ? 
C68 O34 1.265(10) . ? 
C69 N1 1.475(13) . ? 
C69 H69A 0.9600 . ? 
C69 H69B 0.9600 . ? 
C69 H69C 0.9600 . ? 
C70 N1 1.443(12) . ? 
C70 H70A 0.9600 . ? 
C70 H70B 0.9600 . ? 
C70 H70C 0.9600 . ? 
C71 O35 1.219(12) . ? 
C71 N1 1.317(13) . ? 
C72 N2 1.458(12) . ? 
C72 H72A 0.9600 . ? 
C72 H72B 0.9600 . ? 
C72 H72C 0.9600 . ? 
C73 N2 1.452(12) . ? 
C73 H73A 0.9600 . ? 
C73 H73B 0.9600 . ? 
C73 H73C 0.9600 . ? 
C74 O36 1.224(11) . ? 
C74 N2 1.315(12) . ? 
C75 N3 1.418(13) . ? 
C75 H75A 0.9600 . ? 
C75 H75B 0.9600 . ? 
C75 H75C 0.9600 . ? 
C76 N3 1.453(13) . ? 
C76 H76A 0.9600 . ? 
C76 H76B 0.9600 . ? 
C76 H76C 0.9600 . ? 
C77 O37 1.226(12) . ? 
C77 N3 1.320(13) . ? 
C78 C79 1.374(11) 2_765 ? 
C78 C90 1.383(12) . ? 
C78 H78A 0.9300 . ? 
C79 C78 1.374(11) 2_765 ? 
C79 C90 1.387(11) . ? 
C79 H79A 0.9300 . ? 
C80 O38 1.238(10) . ? 
C80 O43 1.252(9) . ? 
C80 C90 1.499(11) . ? 
C81 N5 1.384(13) . ? 
C81 H81A 0.9600 . ? 
C81 H81B 0.9600 . ? 
C81 H81C 0.9600 . ? 
C82 N5 1.435(14) . ? 
C82 H82A 0.9600 . ? 
C82 H82B 0.9600 . ? 
C82 H82C 0.9600 . ? 
C83 O39 1.246(12) . ? 
C83 N5 1.292(13) . ? 
C83 H83A 0.9300 . ? 
C84 N6 1.418(11) . ? 
C84 H84A 0.9600 . ? 
C84 H84B 0.9600 . ? 
C84 H84C 0.9600 . ? 
C85 N6 1.450(12) . ? 
C85 H85A 0.9600 . ? 
C85 H85B 0.9600 . ? 
C85 H85C 0.9600 . ? 
C86 O40 1.222(11) . ? 
C86 N6 1.328(12) . ? 
C86 H86A 0.9300 . ? 
C87 N7 1.457(11) . ? 
C87 H87A 0.9600 . ? 
C87 H87B 0.9600 . ? 
C87 H87C 0.9600 . ? 
C88 N7 1.448(12) . ? 
C88 H88A 0.9600 . ? 
C88 H88B 0.9600 . ? 
C88 H88C 0.9600 . ? 
C89 O41 1.223(11) . ? 
C89 N7 1.315(11) . ? 
C89 H89A 0.9300 . ? 
C91 N4 1.394(13) . ? 
C91 H91A 0.9600 . ? 
C91 H91B 0.9600 . ? 
C91 H91C 0.9600 . ? 
C92 N4 1.456(12) . ? 
C92 H92A 0.9600 . ? 
C92 H92B 0.9600 . ? 
C92 H92C 0.9600 . ? 
C93 O44 1.208(12) . ? 
C93 N4 1.317(13) . ? 
C93 H93A 0.9300 . ? 
C94 N8 1.427(14) . ? 
C94 H94A 0.9600 . ? 
C94 H94B 0.9600 . ? 
C94 H94C 0.9600 . ? 
C95 N8 1.421(13) . ? 
C95 H95A 0.9600 . ? 
C95 H95B 0.9600 . ? 
C95 H95C 0.9600 . ? 
C96 O45 1.254(14) . ? 
C96 N8 1.293(14) . ? 
C96 H96A 0.9300 . ? 
C97 N9 1.460(12) . ? 
C97 H97A 0.9600 . ? 
C97 H97B 0.9600 . ? 
C97 H97C 0.9600 . ? 
C98 N9 1.414(13) . ? 
C98 H98A 0.9600 . ? 
C98 H98B 0.9600 . ? 
C98 H98C 0.9600 . ? 
C99 O47 1.223(12) . ? 
C99 N9 1.315(13) . ? 
C99 H99A 0.9300 . ? 
O1 Ce4 2.374(6) 2_575 ? 
O2 Ce2 2.420(6) 2_575 ? 
O3 Ce4 2.398(6) 2_675 ? 
O5 Ce1 2.434(6) 1_645 ? 
O6 Ce6 2.414(7) 1_645 ? 
O7 Ce6 2.425(7) 1_545 ? 
O9 Ce6 2.456(7) 1_645 ? 
O10 Ce5 2.431(6) 1_655 ? 
O14 Ce6 2.472(6) 2_675 ? 
O15 Ce4 2.431(6) 2_675 ? 
O17 Ce6 2.464(6) 2_776 ? 
O18 Ce5 2.404(6) 2_766 ? 
O21 Ce3 2.505(6) 1_655 ? 
O22 Ce1 2.425(6) 1_655 ? 
O25 Ce2 2.505(6) 2_665 ? 
O26 Ce2 2.773(5) 2_665 ? 
O43 Ce2 2.488(6) 2_665 ? 
O46 Ce5 2.421(6) 2_665 ? 
O1W H1WA 0.8499 . ? 
O1W H1WB 0.8503 . ? 
O2W H2WA 0.8500 . ? 
O2W H2WB 0.8501 . ? 
O3W H3WA 0.8811 . ? 
O3W H3WB 0.8785 . ? 
 
loop_ 
 _geom_angle_atom_site_label_1 
 _geom_angle_atom_site_label_2 
 _geom_angle_atom_site_label_3 
 _geom_angle 
 _geom_angle_site_symmetry_1 
 _geom_angle_site_symmetry_3 
 _geom_angle_publ_flag 
O34 Ce1 O22 79.6(2) . 1_455 ? 
O34 Ce1 O5 151.4(2) . 1_465 ? 
O22 Ce1 O5 79.2(2) 1_455 1_465 ? 
O34 Ce1 O20 97.6(2) . . ? 
O22 Ce1 O20 145.0(2) 1_455 . ? 
O5 Ce1 O20 89.0(2) 1_465 . ? 
O34 Ce1 O23 74.1(2) . . ? 
O22 Ce1 O23 135.1(2) 1_455 . ? 
O5 Ce1 O23 134.3(2) 1_465 . ? 
O20 Ce1 O23 75.1(2) . . ? 
O34 Ce1 O31 124.2(2) . . ? 
O22 Ce1 O31 86.7(2) 1_455 . ? 
O5 Ce1 O31 73.3(2) 1_465 . ? 
O20 Ce1 O31 121.5(2) . . ? 
O23 Ce1 O31 79.3(2) . . ? 
O34 Ce1 O35 74.9(2) . . ? 
O22 Ce1 O35 73.0(2) 1_455 . ? 
O5 Ce1 O35 80.6(2) 1_465 . ? 
O20 Ce1 O35 72.6(2) . . ? 
O23 Ce1 O35 131.1(2) . . ? 
O31 Ce1 O35 149.5(2) . . ? 
O34 Ce1 O32 76.30(18) . . ? 
O22 Ce1 O32 65.98(19) 1_455 . ? 
O5 Ce1 O32 111.63(18) 1_465 . ? 
O20 Ce1 O32 147.75(19) . . ? 
O23 Ce1 O32 72.82(18) . . ? 
O31 Ce1 O32 49.07(18) . . ? 
O35 Ce1 O32 133.18(19) . . ? 
O34 Ce1 C64 101.1(2) . . ? 
O22 Ce1 C64 74.0(2) 1_455 . ? 
O5 Ce1 C64 91.2(2) 1_465 . ? 
O20 Ce1 C64 139.7(2) . . ? 
O23 Ce1 C64 76.3(2) . . ? 
O31 Ce1 C64 24.1(2) . . ? 
O35 Ce1 C64 146.9(2) . . ? 
O32 Ce1 C64 25.1(2) . . ? 
O2 Ce2 O29 89.3(2) 2_575 . ? 
O2 Ce2 O38 142.7(2) 2_575 . ? 
O29 Ce2 O38 77.8(2) . . ? 
O2 Ce2 O26 146.94(19) 2_575 . ? 
O29 Ce2 O26 98.61(19) . . ? 
O38 Ce2 O26 70.3(2) . . ? 
O2 Ce2 O43 78.9(2) 2_575 2_665 ? 
O29 Ce2 O43 143.5(2) . 2_665 ? 
O38 Ce2 O43 130.35(19) . 2_665 ? 
O26 Ce2 O43 75.81(19) . 2_665 ? 
O2 Ce2 O25 74.7(2) 2_575 2_665 ? 
O29 Ce2 O25 130.06(19) . 2_665 ? 
O38 Ce2 O25 87.1(2) . 2_665 ? 
O26 Ce2 O25 120.59(19) . 2_665 ? 
O43 Ce2 O25 80.04(19) 2_665 2_665 ? 
O2 Ce2 O40 77.7(2) 2_575 . ? 
O29 Ce2 O40 71.4(2) . . ? 
O38 Ce2 O40 128.4(2) . . ? 
O26 Ce2 O40 74.65(19) . . ? 
O43 Ce2 O40 72.38(19) 2_665 . ? 
O25 Ce2 O40 144.0(2) 2_665 . ? 
O2 Ce2 O26 114.77(18) 2_575 2_665 ? 
O29 Ce2 O26 149.46(19) . 2_665 ? 
O38 Ce2 O26 71.66(18) . 2_665 ? 
O26 Ce2 O26 71.94(19) . 2_665 ? 
O43 Ce2 O26 63.89(18) 2_665 2_665 ? 
O25 Ce2 O26 48.70(18) 2_665 2_665 ? 
O40 Ce2 O26 129.83(19) . 2_665 ? 
O2 Ce2 O3W 77.30(19) 2_575 . ? 
O29 Ce2 O3W 67.62(18) . . ? 
O38 Ce2 O3W 65.38(19) . . ? 
O26 Ce2 O3W 135.34(19) . . ? 
O43 Ce2 O3W 139.92(18) 2_665 . ? 
O25 Ce2 O3W 62.82(18) 2_665 . ? 
O40 Ce2 O3W 131.66(19) . . ? 
O26 Ce2 O3W 98.22(17) 2_665 . ? 
O2 Ce2 C53 94.3(2) 2_575 2_665 ? 
O29 Ce2 C53 146.3(2) . 2_665 ? 
O38 Ce2 C53 79.2(2) . 2_665 ? 
O26 Ce2 C53 96.5(2) . 2_665 ? 
O43 Ce2 C53 69.7(2) 2_665 2_665 ? 
O25 Ce2 C53 24.2(2) 2_665 2_665 ? 
O40 Ce2 C53 142.0(2) . 2_665 ? 
O26 Ce2 C53 24.56(19) 2_665 2_665 ? 
O3W Ce2 C53 80.5(2) . 2_665 ? 
O11 Ce3 O28 89.8(2) . . ? 
O11 Ce3 O24 80.6(2) . . ? 
O28 Ce3 O24 142.0(2) . . ? 
O11 Ce3 O32 145.69(19) . . ? 
O28 Ce3 O32 95.25(19) . . ? 
O24 Ce3 O32 74.6(2) . . ? 
O11 Ce3 O21 145.1(2) . 1_455 ? 
O28 Ce3 O21 76.3(2) . 1_455 ? 
O24 Ce3 O21 129.1(2) . 1_455 ? 
O32 Ce3 O21 68.4(2) . 1_455 ? 
O11 Ce3 O33 75.6(2) . . ? 
O28 Ce3 O33 136.1(2) . . ? 
O24 Ce3 O33 76.9(2) . . ? 
O32 Ce3 O33 120.11(19) . . ? 
O21 Ce3 O33 92.4(2) 1_455 . ? 
O11 Ce3 O2W 79.66(19) . . ? 
O28 Ce3 O2W 70.34(18) . . ? 
O24 Ce3 O2W 141.58(18) . . ? 
O32 Ce3 O2W 133.85(19) . . ? 
O21 Ce3 O2W 65.61(19) 1_455 . ? 
O33 Ce3 O2W 66.37(18) . . ? 
O11 Ce3 O41 75.32(19) . . ? 
O28 Ce3 O41 70.4(2) . . ? 
O24 Ce3 O41 71.59(19) . . ? 
O32 Ce3 O41 74.54(19) . . ? 
O21 Ce3 O41 126.8(2) 1_455 . ? 
O33 Ce3 O41 139.9(2) . . ? 
O2W Ce3 O41 133.00(18) . . ? 
O11 Ce3 O34 116.56(18) . . ? 
O28 Ce3 O34 149.03(19) . . ? 
O24 Ce3 O34 63.36(18) . . ? 
O32 Ce3 O34 72.52(17) . . ? 
O21 Ce3 O34 72.78(19) 1_455 . ? 
O33 Ce3 O34 47.62(19) . . ? 
O2W Ce3 O34 97.31(16) . . ? 
O41 Ce3 O34 129.42(18) . . ? 
O11 Ce3 C68 95.9(2) . . ? 
O28 Ce3 C68 149.2(2) . . ? 
O24 Ce3 C68 68.7(2) . . ? 
O32 Ce3 C68 96.8(2) . . ? 
O21 Ce3 C68 82.1(2) 1_455 . ? 
O33 Ce3 C68 23.3(2) . . ? 
O2W Ce3 C68 80.9(2) . . ? 
O41 Ce3 C68 140.2(2) . . ? 
O34 Ce3 C68 24.33(19) . . ? 
O1 Ce4 O3 138.9(2) 2_575 2_675 ? 
O1 Ce4 O15 147.2(2) 2_575 2_675 ? 
O3 Ce4 O15 73.9(2) 2_675 2_675 ? 
O1 Ce4 O16 79.2(2) 2_575 . ? 
O3 Ce4 O16 76.1(2) 2_675 . ? 
O15 Ce4 O16 120.6(2) 2_675 . ? 
O1 Ce4 O4 82.9(2) 2_575 . ? 
O3 Ce4 O4 120.3(2) 2_675 . ? 
O15 Ce4 O4 78.7(2) 2_675 . ? 
O16 Ce4 O4 74.2(2) . . ? 
O1 Ce4 O30 95.9(2) 2_575 . ? 
O3 Ce4 O30 79.8(2) 2_675 . ? 
O15 Ce4 O30 87.0(2) 2_675 . ? 
O16 Ce4 O30 135.3(2) . . ? 
O4 Ce4 O30 149.9(2) . . ? 
O1 Ce4 O39 73.0(2) 2_575 . ? 
O3 Ce4 O39 140.5(2) 2_675 . ? 
O15 Ce4 O39 76.8(2) 2_675 . ? 
O16 Ce4 O39 142.8(2) . . ? 
O4 Ce4 O39 78.1(2) . . ? 
O30 Ce4 O39 72.8(2) . . ? 
O1 Ce4 O3W 66.8(2) 2_575 . ? 
O3 Ce4 O3W 75.3(2) 2_675 . ? 
O15 Ce4 O3W 139.9(2) 2_675 . ? 
O16 Ce4 O3W 75.1(2) . . ? 
O4 Ce4 O3W 140.10(19) . . ? 
O30 Ce4 O3W 62.60(18) . . ? 
O39 Ce4 O3W 114.3(2) . . ? 
O12 Ce5 O18 79.6(2) . 2_766 ? 
O12 Ce5 O46 149.2(2) . 2_665 ? 
O18 Ce5 O46 123.4(2) 2_766 2_665 ? 
O12 Ce5 O10 133.4(2) . 1_455 ? 
O18 Ce5 O10 76.9(2) 2_766 1_455 ? 
O46 Ce5 O10 75.7(2) 2_665 1_455 ? 
O12 Ce5 O27 88.7(2) . . ? 
O18 Ce5 O27 125.5(2) 2_766 . ? 
O46 Ce5 O27 92.0(2) 2_665 . ? 
O10 Ce5 O27 73.7(2) 1_455 . ? 
O12 Ce5 O8 80.8(2) . . ? 
O18 Ce5 O8 77.0(2) 2_766 . ? 
O46 Ce5 O8 84.9(2) 2_665 . ? 
O10 Ce5 O8 130.6(2) 1_455 . ? 
O27 Ce5 O8 153.2(2) . . ? 
O12 Ce5 O37 74.0(2) . . ? 
O18 Ce5 O37 145.9(2) 2_766 . ? 
O46 Ce5 O37 76.4(2) 2_665 . ? 
O10 Ce5 O37 137.2(2) 1_455 . ? 
O27 Ce5 O37 75.6(2) . . ? 
O8 Ce5 O37 77.8(2) . . ? 
O6 Ce6 O7 144.0(2) 1_465 1_565 ? 
O6 Ce6 O1W 72.8(2) 1_465 . ? 
O7 Ce6 O1W 73.5(2) 1_565 . ? 
O6 Ce6 O19 88.1(2) 1_465 . ? 
O7 Ce6 O19 90.4(2) 1_565 . ? 
O1W Ce6 O19 67.1(2) . . ? 
O6 Ce6 O9 87.6(2) 1_465 1_465 ? 
O7 Ce6 O9 111.6(2) 1_565 1_465 ? 
O1W Ce6 O9 141.2(2) . 1_465 ? 
O19 Ce6 O9 147.0(2) . 1_465 ? 
O6 Ce6 O17 145.4(2) 1_465 2_776 ? 
O7 Ce6 O17 70.4(2) 1_565 2_776 ? 
O1W Ce6 O17 135.4(2) . 2_776 ? 
O19 Ce6 O17 87.7(2) . 2_776 ? 
O9 Ce6 O17 77.7(2) 1_465 2_776 ? 
O6 Ce6 O14 81.0(2) 1_465 2_675 ? 
O7 Ce6 O14 77.0(2) 1_565 2_675 ? 
O1W Ce6 O14 72.2(2) . 2_675 ? 
O19 Ce6 O14 139.3(2) . 2_675 ? 
O9 Ce6 O14 71.8(2) 1_465 2_675 ? 
O17 Ce6 O14 122.2(2) 2_776 2_675 ? 
O6 Ce6 O36 74.3(2) 1_465 . ? 
O7 Ce6 O36 138.8(2) 1_565 . ? 
O1W Ce6 O36 127.9(2) . . ? 
O19 Ce6 O36 72.6(2) . . ? 
O9 Ce6 O36 74.8(2) 1_465 . ? 
O17 Ce6 O36 71.7(2) 2_776 . ? 
O14 Ce6 O36 138.9(2) 2_675 . ? 
C6 C1 C2 119.0(8) . . ? 
C6 C1 C7 120.9(8) . . ? 
C2 C1 C7 120.0(8) . . ? 
C3 C2 C1 120.4(8) . . ? 
C3 C2 H2A 119.8 . . ? 
C1 C2 H2A 119.8 . . ? 
C2 C3 C4 120.1(8) . . ? 
C2 C3 H3A 119.9 . . ? 
C4 C3 H3A 119.9 . . ? 
C5 C4 C3 119.4(8) . . ? 
C5 C4 C8 120.1(8) . . ? 
C3 C4 C8 120.4(8) . . ? 
C4 C5 C6 119.9(9) . . ? 
C4 C5 H5A 120.0 . . ? 
C6 C5 H5A 120.0 . . ? 
C1 C6 C5 121.2(9) . . ? 
C1 C6 H6A 119.4 . . ? 
C5 C6 H6A 119.4 . . ? 
O2 C7 O1 123.8(8) . . ? 
O2 C7 C1 119.6(7) . . ? 
O1 C7 C1 116.5(8) . . ? 
O4 C8 O3 124.7(8) . . ? 
O4 C8 C4 117.9(8) . . ? 
O3 C8 C4 117.4(8) . . ? 
C10 C9 C14 119.0(8) . . ? 
C10 C9 C15 120.4(8) . . ? 
C14 C9 C15 120.6(8) . . ? 
C11 C10 C9 120.4(9) . . ? 
C11 C10 H10A 119.8 . . ? 
C9 C10 H10A 119.8 . . ? 
C10 C11 C12 120.9(9) . . ? 
C10 C11 H11A 119.5 . . ? 
C12 C11 H11A 119.5 . . ? 
C13 C12 C11 118.3(8) . . ? 
C13 C12 C16 122.0(8) . . ? 
C11 C12 C16 119.7(8) . . ? 
C14 C13 C12 120.9(8) . . ? 
C14 C13 H13A 119.6 . . ? 
C12 C13 H13A 119.6 . . ? 
C13 C14 C9 120.5(9) . . ? 
C13 C14 H14A 119.8 . . ? 
C9 C14 H14A 119.8 . . ? 
O6 C15 O5 121.6(9) . . ? 
O6 C15 C9 118.0(9) . . ? 
O5 C15 C9 120.4(8) . . ? 
O7 C16 O8 124.4(9) . . ? 
O7 C16 C12 116.9(8) . . ? 
O8 C16 C12 118.7(8) . . ? 
C18 C17 C22 120.0(9) . . ? 
C18 C17 H17A 120.0 . . ? 
C22 C17 H17A 120.0 . . ? 
C19 C18 C17 121.3(9) . . ? 
C19 C18 H18A 119.3 . . ? 
C17 C18 H18A 119.3 . . ? 
C20 C19 C18 119.4(9) . . ? 
C20 C19 C23 119.5(8) . . ? 
C18 C19 C23 120.9(8) . . ? 
C19 C20 C21 120.1(9) . . ? 
C19 C20 H20A 119.9 . . ? 
C21 C20 H20A 119.9 . . ? 
C22 C21 C20 120.7(8) . . ? 
C22 C21 H21A 119.6 . . ? 
C20 C21 H21A 119.6 . . ? 
C21 C22 C17 118.3(8) . . ? 
C21 C22 C24 121.0(8) . . ? 
C17 C22 C24 120.8(8) . . ? 
O10 C23 O9 125.5(9) . . ? 
O10 C23 C19 118.0(8) . . ? 
O9 C23 C19 116.4(8) . . ? 
O11 C24 O12 125.7(8) . . ? 
O11 C24 C22 118.5(8) . . ? 
O12 C24 C22 115.7(8) . . ? 
C30 C25 C26 120.4(8) . . ? 
C30 C25 H25A 119.8 . . ? 
C26 C25 H25A 119.8 . . ? 
C25 C26 C27 120.5(8) . . ? 
C25 C26 H26A 119.8 . . ? 
C27 C26 H26A 119.8 . . ? 
C28 C27 C26 119.2(8) . . ? 
C28 C27 C31 119.9(8) . . ? 
C26 C27 C31 120.8(8) . . ? 
C27 C28 C29 119.5(8) . . ? 
C27 C28 H28A 120.3 . . ? 
C29 C28 H28A 120.3 . . ? 
C30 C29 C28 121.4(8) . . ? 
C30 C29 H29A 119.3 . . ? 
C28 C29 H29A 119.3 . . ? 
C29 C30 C25 119.1(8) . . ? 
C29 C30 C32 120.5(8) . . ? 
C25 C30 C32 120.3(8) . . ? 
O15 C31 O16 124.6(8) . . ? 
O15 C31 C27 118.5(8) . . ? 
O16 C31 C27 116.8(8) . . ? 
O46 C32 O14 124.2(8) . . ? 
O46 C32 C30 118.1(8) . . ? 
O14 C32 C30 117.6(8) . . ? 
C38 C33 C34 119.1(8) . . ? 
C38 C33 H33A 120.5 . . ? 
C34 C33 H33A 120.5 . . ? 
C35 C34 C33 120.5(8) . . ? 
C35 C34 H34A 119.8 . . ? 
C33 C34 H34A 119.8 . . ? 
C34 C35 C36 119.5(8) . . ? 
C34 C35 C39 120.2(7) . . ? 
C36 C35 C39 120.1(8) . . ? 
C35 C36 C37 119.9(8) . . ? 
C35 C36 H36A 120.0 . . ? 
C37 C36 H36A 120.0 . . ? 
C38 C37 C36 121.0(8) . . ? 
C38 C37 H37A 119.5 . . ? 
C36 C37 H37A 119.5 . . ? 
C37 C38 C33 120.0(8) . . ? 
C37 C38 C40 119.3(8) . . ? 
C33 C38 C40 120.7(8) . . ? 
O20 C39 O19 126.4(8) . . ? 
O20 C39 C35 117.9(8) . . ? 
O19 C39 C35 115.7(8) . . ? 
O18 C40 O17 125.7(9) . . ? 
O18 C40 C38 117.6(8) . . ? 
O17 C40 C38 116.7(8) . . ? 
C46 C41 C42 121.1(9) . . ? 
C46 C41 H41A 119.5 . . ? 
C42 C41 H41A 119.5 . . ? 
C41 C42 C43 119.5(9) . . ? 
C41 C42 H42A 120.2 . . ? 
C43 C42 H42A 120.2 . . ? 
C44 C43 C42 119.4(9) . . ? 
C44 C43 C48 121.4(8) . . ? 
C42 C43 C48 119.3(8) . . ? 
C43 C44 C45 120.1(9) . . ? 
C43 C44 H44A 120.0 . . ? 
C45 C44 H44A 120.0 . . ? 
C46 C45 C44 122.1(9) . . ? 
C46 C45 H45A 119.0 . . ? 
C44 C45 H45A 119.0 . . ? 
C45 C46 C41 117.9(9) . . ? 
C45 C46 C47 122.6(8) . . ? 
C41 C46 C47 119.5(8) . . ? 
O22 C47 O21 124.5(9) . . ? 
O22 C47 C46 118.1(8) . . ? 
O21 C47 C46 117.3(8) . . ? 
O23 C48 O24 125.3(9) . . ? 
O23 C48 C43 121.5(8) . . ? 
O24 C48 C43 113.3(8) . . ? 
C50 C49 C52 120.9(8) . . ? 
C50 C49 H49A 119.5 . . ? 
C52 C49 H49A 119.5 . . ? 
C49 C50 C51 119.4(8) . . ? 
C49 C50 C53 121.3(7) . . ? 
C51 C50 C53 119.3(7) . . ? 
C55 C51 C50 119.6(8) . . ? 
C55 C51 H51A 120.2 . . ? 
C50 C51 H51A 120.2 . . ? 
C56 C52 C49 119.5(9) . . ? 
C56 C52 H52A 120.3 . . ? 
C49 C52 H52A 120.3 . . ? 
O26 C53 O25 121.7(8) . . ? 
O26 C53 C50 120.7(8) . . ? 
O25 C53 C50 117.6(8) . . ? 
O26 C53 Ce2 67.0(4) . 2_665 ? 
O25 C53 Ce2 54.7(4) . 2_665 ? 
C50 C53 Ce2 171.6(6) . 2_665 ? 
O28 C54 O27 123.7(7) . . ? 
O28 C54 C56 118.0(7) . . ? 
O27 C54 C56 118.2(7) . . ? 
C56 C55 C51 120.2(8) . . ? 
C56 C55 H55A 119.9 . . ? 
C51 C55 H55A 119.9 . . ? 
C55 C56 C52 120.3(8) . . ? 
C55 C56 C54 119.4(7) . . ? 
C52 C56 C54 120.2(8) . . ? 
O29 C57 O30 124.3(7) . . ? 
O29 C57 C58 118.2(7) . . ? 
O30 C57 C58 117.5(7) . . ? 
C63 C58 C59 118.5(8) . . ? 
C63 C58 C57 121.0(7) . . ? 
C59 C58 C57 120.4(7) . . ? 
C58 C59 C60 122.4(8) . . ? 
C58 C59 H59A 118.8 . . ? 
C60 C59 H59A 118.8 . . ? 
C59 C60 C61 117.9(8) . . ? 
C59 C60 H60A 121.0 . . ? 
C61 C60 H60A 121.0 . . ? 
C62 C61 C60 120.7(8) . . ? 
C62 C61 C64 119.9(7) . . ? 
C60 C61 C64 119.4(8) . . ? 
C61 C62 C63 119.2(8) . . ? 
C61 C62 H62A 120.4 . . ? 
C63 C62 H62A 120.4 . . ? 
C58 C63 C62 121.3(8) . . ? 
C58 C63 H63A 119.3 . . ? 
C62 C63 H63A 119.3 . . ? 
O31 C64 O32 121.2(8) . . ? 
O31 C64 C61 118.8(8) . . ? 
O32 C64 C61 120.0(8) . . ? 
O31 C64 Ce1 56.7(4) . . ? 
O32 C64 Ce1 64.9(4) . . ? 
C61 C64 Ce1 171.6(6) . . ? 
C67 C65 C66 120.9(9) . 2_766 ? 
C67 C65 H65A 119.5 . . ? 
C66 C65 H65A 119.5 2_766 . ? 
C65 C66 C67 118.9(9) 2_766 . ? 
C65 C66 H66A 120.6 2_766 . ? 
C67 C66 H66A 120.6 . . ? 
C65 C67 C66 120.2(8) . . ? 
C65 C67 C68 119.0(8) . . ? 
C66 C67 C68 120.8(8) . . ? 
O33 C68 O34 122.4(8) . . ? 
O33 C68 C67 118.6(8) . . ? 
O34 C68 C67 119.0(8) . . ? 
O33 C68 Ce3 53.5(4) . . ? 
O34 C68 Ce3 68.9(4) . . ? 
C67 C68 Ce3 172.0(6) . . ? 
N1 C69 H69A 109.5 . . ? 
N1 C69 H69B 109.5 . . ? 
H69A C69 H69B 109.5 . . ? 
N1 C69 H69C 109.5 . . ? 
H69A C69 H69C 109.5 . . ? 
H69B C69 H69C 109.5 . . ? 
N1 C70 H70A 109.5 . . ? 
N1 C70 H70B 109.5 . . ? 
H70A C70 H70B 109.5 . . ? 
N1 C70 H70C 109.5 . . ? 
H70A C70 H70C 109.5 . . ? 
H70B C70 H70C 109.5 . . ? 
O35 C71 N1 124.4(11) . . ? 
N2 C72 H72A 109.5 . . ? 
N2 C72 H72B 109.5 . . ? 
H72A C72 H72B 109.5 . . ? 
N2 C72 H72C 109.5 . . ? 
H72A C72 H72C 109.5 . . ? 
H72B C72 H72C 109.5 . . ? 
N2 C73 H73A 109.5 . . ? 
N2 C73 H73B 109.5 . . ? 
H73A C73 H73B 109.5 . . ? 
N2 C73 H73C 109.5 . . ? 
H73A C73 H73C 109.5 . . ? 
H73B C73 H73C 109.5 . . ? 
O36 C74 N2 121.0(10) . . ? 
N3 C75 H75A 109.5 . . ? 
N3 C75 H75B 109.5 . . ? 
H75A C75 H75B 109.5 . . ? 
N3 C75 H75C 109.5 . . ? 
H75A C75 H75C 109.5 . . ? 
H75B C75 H75C 109.5 . . ? 
N3 C76 H76A 109.5 . . ? 
N3 C76 H76B 109.5 . . ? 
H76A C76 H76B 109.5 . . ? 
N3 C76 H76C 109.5 . . ? 
H76A C76 H76C 109.5 . . ? 
H76B C76 H76C 109.5 . . ? 
O37 C77 N3 122.7(11) . . ? 
C79 C78 C90 121.4(8) 2_765 . ? 
C79 C78 H78A 119.3 2_765 . ? 
C90 C78 H78A 119.3 . . ? 
C78 C79 C90 120.4(8) 2_765 . ? 
C78 C79 H79A 119.8 2_765 . ? 
C90 C79 H79A 119.8 . . ? 
O38 C80 O43 125.5(8) . . ? 
O38 C80 C90 117.9(7) . . ? 
O43 C80 C90 116.6(8) . . ? 
N5 C81 H81A 109.5 . . ? 
N5 C81 H81B 109.5 . . ? 
H81A C81 H81B 109.5 . . ? 
N5 C81 H81C 109.5 . . ? 
H81A C81 H81C 109.5 . . ? 
H81B C81 H81C 109.5 . . ? 
N5 C82 H82A 109.5 . . ? 
N5 C82 H82B 109.5 . . ? 
H82A C82 H82B 109.5 . . ? 
N5 C82 H82C 109.5 . . ? 
H82A C82 H82C 109.5 . . ? 
H82B C82 H82C 109.5 . . ? 
O39 C83 N5 123.4(12) . . ? 
O39 C83 H83A 118.3 . . ? 
N5 C83 H83A 118.3 . . ? 
N6 C84 H84A 109.5 . . ? 
N6 C84 H84B 109.5 . . ? 
H84A C84 H84B 109.5 . . ? 
N6 C84 H84C 109.5 . . ? 
H84A C84 H84C 109.5 . . ? 
H84B C84 H84C 109.5 . . ? 
N6 C85 H85A 109.5 . . ? 
N6 C85 H85B 109.5 . . ? 
H85A C85 H85B 109.5 . . ? 
N6 C85 H85C 109.5 . . ? 
H85A C85 H85C 109.5 . . ? 
H85B C85 H85C 109.5 . . ? 
O40 C86 N6 126.8(10) . . ? 
O40 C86 H86A 116.6 . . ? 
N6 C86 H86A 116.6 . . ? 
N7 C87 H87A 109.5 . . ? 
N7 C87 H87B 109.5 . . ? 
H87A C87 H87B 109.5 . . ? 
N7 C87 H87C 109.5 . . ? 
H87A C87 H87C 109.5 . . ? 
H87B C87 H87C 109.5 . . ? 
N7 C88 H88A 109.5 . . ? 
N7 C88 H88B 109.5 . . ? 
H88A C88 H88B 109.5 . . ? 
N7 C88 H88C 109.5 . . ? 
H88A C88 H88C 109.5 . . ? 
H88B C88 H88C 109.5 . . ? 
O41 C89 N7 126.2(10) . . ? 
O41 C89 H89A 116.9 . . ? 
N7 C89 H89A 116.9 . . ? 
C78 C90 C79 118.2(8) . . ? 
C78 C90 C80 120.5(8) . . ? 
C79 C90 C80 121.3(8) . . ? 
N4 C91 H91A 109.5 . . ? 
N4 C91 H91B 109.5 . . ? 
H91A C91 H91B 109.5 . . ? 
N4 C91 H91C 109.5 . . ? 
H91A C91 H91C 109.5 . . ? 
H91B C91 H91C 109.5 . . ? 
N4 C92 H92A 109.5 . . ? 
N4 C92 H92B 109.5 . . ? 
H92A C92 H92B 109.5 . . ? 
N4 C92 H92C 109.5 . . ? 
H92A C92 H92C 109.5 . . ? 
H92B C92 H92C 109.5 . . ? 
O44 C93 N4 125.1(12) . . ? 
O44 C93 H93A 117.5 . . ? 
N4 C93 H93A 117.5 . . ? 
N8 C94 H94A 109.5 . . ? 
N8 C94 H94B 109.5 . . ? 
H94A C94 H94B 109.5 . . ? 
N8 C94 H94C 109.5 . . ? 
H94A C94 H94C 109.5 . . ? 
H94B C94 H94C 109.5 . . ? 
N8 C95 H95A 109.5 . . ? 
N8 C95 H95B 109.5 . . ? 
H95A C95 H95B 109.5 . . ? 
N8 C95 H95C 109.5 . . ? 
H95A C95 H95C 109.5 . . ? 
H95B C95 H95C 109.5 . . ? 
O45 C96 N8 123.2(13) . . ? 
O45 C96 H96A 118.4 . . ? 
N8 C96 H96A 118.4 . . ? 
N9 C97 H97A 109.5 . . ? 
N9 C97 H97B 109.5 . . ? 
H97A C97 H97B 109.5 . . ? 
N9 C97 H97C 109.5 . . ? 
H97A C97 H97C 109.5 . . ? 
H97B C97 H97C 109.5 . . ? 
N9 C98 H98A 109.5 . . ? 
N9 C98 H98B 109.5 . . ? 
H98A C98 H98B 109.5 . . ? 
N9 C98 H98C 109.5 . . ? 
H98A C98 H98C 109.5 . . ? 
H98B C98 H98C 109.5 . . ? 
O47 C99 N9 127.9(11) . . ? 
O47 C99 H99A 116.0 . . ? 
N9 C99 H99A 116.0 . . ? 
C71 N1 C70 122.4(10) . . ? 
C71 N1 C69 119.6(10) . . ? 
C70 N1 C69 118.0(9) . . ? 
C74 N2 C73 127.0(9) . . ? 
C74 N2 C72 116.7(9) . . ? 
C73 N2 C72 116.3(8) . . ? 
C77 N3 C75 123.2(11) . . ? 
C77 N3 C76 118.8(10) . . ? 
C75 N3 C76 118.0(10) . . ? 
C93 N4 C91 123.9(10) . . ? 
C93 N4 C92 120.6(10) . . ? 
C91 N4 C92 115.4(9) . . ? 
C83 N5 C81 123.8(11) . . ? 
C83 N5 C82 120.3(11) . . ? 
C81 N5 C82 115.8(10) . . ? 
C86 N6 C84 120.0(9) . . ? 
C86 N6 C85 121.1(9) . . ? 
C84 N6 C85 118.7(8) . . ? 
C89 N7 C88 121.3(9) . . ? 
C89 N7 C87 120.4(9) . . ? 
C88 N7 C87 118.1(8) . . ? 
C96 N8 C95 123.4(12) . . ? 
C96 N8 C94 122.3(12) . . ? 
C95 N8 C94 114.2(10) . . ? 
C99 N9 C98 123.7(10) . . ? 
C99 N9 C97 119.7(10) . . ? 
C98 N9 C97 116.6(9) . . ? 
C7 O1 Ce4 160.7(6) . 2_575 ? 
C7 O2 Ce2 131.9(5) . 2_575 ? 
C8 O3 Ce4 139.6(6) . 2_675 ? 
C8 O4 Ce4 133.8(6) . . ? 
C15 O5 Ce1 122.6(6) . 1_645 ? 
C15 O6 Ce6 172.8(6) . 1_645 ? 
C16 O7 Ce6 158.2(6) . 1_545 ? 
C16 O8 Ce5 117.3(6) . . ? 
C23 O9 Ce6 137.5(6) . 1_645 ? 
C23 O10 Ce5 135.8(6) . 1_655 ? 
C24 O11 Ce3 135.5(6) . . ? 
C24 O12 Ce5 161.3(6) . . ? 
C32 O14 Ce6 139.7(6) . 2_675 ? 
C31 O15 Ce4 157.1(6) . 2_675 ? 
C31 O16 Ce4 137.4(6) . . ? 
C40 O17 Ce6 150.1(6) . 2_776 ? 
C40 O18 Ce5 139.6(6) . 2_766 ? 
C39 O19 Ce6 140.0(6) . . ? 
C39 O20 Ce1 145.1(6) . . ? 
C47 O21 Ce3 134.3(6) . 1_655 ? 
C47 O22 Ce1 138.1(6) . 1_655 ? 
C48 O23 Ce1 129.1(6) . . ? 
C48 O24 Ce3 141.5(6) . . ? 
C53 O25 Ce2 101.1(5) . 2_665 ? 
C53 O26 Ce2 163.5(5) . . ? 
C53 O26 Ce2 88.4(5) . 2_665 ? 
Ce2 O26 Ce2 108.06(19) . 2_665 ? 
C54 O27 Ce5 141.7(5) . . ? 
C54 O28 Ce3 147.0(6) . . ? 
C57 O29 Ce2 151.7(6) . . ? 
C57 O30 Ce4 138.2(5) . . ? 
C64 O31 Ce1 99.2(5) . . ? 
C64 O32 Ce3 161.7(5) . . ? 
C64 O32 Ce1 90.0(5) . . ? 
Ce3 O32 Ce1 106.68(19) . . ? 
C68 O33 Ce3 103.2(5) . . ? 
C68 O34 Ce1 168.7(6) . . ? 
C68 O34 Ce3 86.8(5) . . ? 
Ce1 O34 Ce3 104.49(19) . . ? 
C71 O35 Ce1 123.8(7) . . ? 
C74 O36 Ce6 126.5(7) . . ? 
C77 O37 Ce5 129.3(7) . . ? 
C80 O38 Ce2 133.8(6) . . ? 
C83 O39 Ce4 127.3(8) . . ? 
C86 O40 Ce2 124.2(6) . . ? 
C89 O41 Ce3 125.7(6) . . ? 
C80 O43 Ce2 139.3(6) . 2_665 ? 
C32 O46 Ce5 153.0(6) . 2_665 ? 
Ce6 O1W H1WA 110.8 . . ? 
Ce6 O1W H1WB 111.1 . . ? 
H1WA O1W H1WB 109.3 . . ? 
Ce3 O2W H2WA 106.9 . . ? 
Ce3 O2W H2WB 107.2 . . ? 
H2WA O2W H2WB 106.9 . . ? 
Ce4 O3W Ce2 122.7(2) . . ? 
Ce4 O3W H3WA 135.6 . . ? 
Ce2 O3W H3WA 75.8 . . ? 
Ce4 O3W H3WB 99.7 . . ? 
Ce2 O3W H3WB 121.0 . . ? 
H3WA O3W H3WB 102.5 . . ? 
 
_diffrn_measured_fraction_theta_max    0.976 
_diffrn_reflns_theta_full              25.50 
_diffrn_measured_fraction_theta_full   0.976 
_refine_diff_density_max    2.458 
_refine_diff_density_min   -1.535 
_refine_diff_density_rms    0.195 

#===END


data_3Nd
_database_code_depnum_ccdc_archive 'CCDC 745287'
_audit_creation_method           SHELXL-97
_chemical_name_systematic        
;
?
;
_chemical_name_common             ? 
_chemical_melting_point           ? 
_chemical_formula_moiety          'C90 H81 N6 Nd6 O45, 3(C3 H7 N O)' 
_chemical_formula_sum 
 'C99 H102 N9 Nd6 O48' 
_chemical_formula_weight          3051.34 
 
loop_ 
 _atom_type_symbol 
 _atom_type_description 
 _atom_type_scat_dispersion_real 
 _atom_type_scat_dispersion_imag 
 _atom_type_scat_source 
 'C'  'C'   0.0033   0.0016 
 'International Tables Vol C Tables 4.2.6.8 and 6.1.1.4' 
 'H'  'H'   0.0000   0.0000 
 'International Tables Vol C Tables 4.2.6.8 and 6.1.1.4' 
 'N'  'N'   0.0061   0.0033 
 'International Tables Vol C Tables 4.2.6.8 and 6.1.1.4' 
 'O'  'O'   0.0106   0.0060 
 'International Tables Vol C Tables 4.2.6.8 and 6.1.1.4' 
 'Nd'  'Nd'  -0.1943   3.0179 
 'International Tables Vol C Tables 4.2.6.8 and 6.1.1.4' 
 
_symmetry_cell_setting            'triclinic' 
_symmetry_space_group_name_H-M    'p -1'
_symmetry_space_group_name_Hall   '-p 1'
 
loop_ 
 _symmetry_equiv_pos_as_xyz 
 'x, y, z' 
 '-x, -y, -z' 
 
_cell_length_a                    11.1436(14) 
_cell_length_b                    17.850(2) 
_cell_length_c                    29.340(4) 
_cell_angle_alpha                 86.638(2) 
_cell_angle_beta                  79.666(2) 
_cell_angle_gamma                 73.206(2) 
_cell_volume                      5496.6(12) 
_cell_formula_units_Z             2 
_cell_measurement_temperature     298(2) 
_cell_measurement_reflns_used     6424 
_cell_measurement_theta_min       2.20
_cell_measurement_theta_max       27.50
 
_exptl_crystal_description        block
_exptl_crystal_colour             colorless 
_exptl_crystal_size_max           0.30 
_exptl_crystal_size_mid           0.26 
_exptl_crystal_size_min           0.23 
_exptl_crystal_density_meas       ? 
_exptl_crystal_density_diffrn     1.844 
_exptl_crystal_density_method     'not measured' 
_exptl_crystal_F_000              3006 
_exptl_absorpt_coefficient_mu     2.880
_exptl_absorpt_correction_type    'multi-scan' 
_exptl_absorpt_correction_T_min   0.4787 
_exptl_absorpt_correction_T_max   0.5572 
_exptl_absorpt_process_details    'SADABS(Sheldrick,2003)'
 
_exptl_special_details 
; 
 ? 
; 
 
_diffrn_ambient_temperature       298(2) 
_diffrn_radiation_wavelength      0.71073 
_diffrn_radiation_type            MoK\a 
_diffrn_radiation_source          'fine-focus sealed tube' 
_diffrn_radiation_monochromator   graphite 
_diffrn_measurement_device_type  'Bruker Smart Apex CCD area detector'
_diffrn_measurement_method       'phi and omega scans'
_diffrn_detector_area_resol_mean  ? 
_diffrn_standards_number          ? 
_diffrn_standards_interval_count  ? 
_diffrn_standards_interval_time   ? 
_diffrn_standards_decay_%         ? 
_diffrn_reflns_number             29723 
_diffrn_reflns_av_R_equivalents   0.0604 
_diffrn_reflns_av_sigmaI/netI     0.0989 
_diffrn_reflns_limit_h_min        -13 
_diffrn_reflns_limit_h_max        13 
_diffrn_reflns_limit_k_min        -22 
_diffrn_reflns_limit_k_max        11 
_diffrn_reflns_limit_l_min        -36 
_diffrn_reflns_limit_l_max        36 
_diffrn_reflns_theta_min          1.84 
_diffrn_reflns_theta_max          26.00 
_reflns_number_total              21066 
_reflns_number_gt                 14292 
_reflns_threshold_expression      >2sigma(I) 
 
_computing_data_collection        'SMART(Bruker, 2003)'
_computing_cell_refinement        'SAINTPLUS(Bruker, 2003)'
_computing_data_reduction         'SAINTPLUS'
_computing_structure_solution     'SHELXS-97 (Sheldrick, 2008)' 
_computing_structure_refinement   'SHELXL-97 (Sheldrick, 2008)' 
_computing_molecular_graphics     'SHELXTL(Bruker, 2008)' 
_computing_publication_material   'SHELXTL' 
 
_refine_special_details 
; 
 Refinement of F^2^ against ALL reflections.  The weighted R-factor wR and 
 goodness of fit S are based on F^2^, conventional R-factors R are based 
 on F, with F set to zero for negative F^2^. The threshold expression of 
 F^2^ > 2sigma(F^2^) is used only for calculating R-factors(gt) etc. and is 
 not relevant to the choice of reflections for refinement.  R-factors based 
 on F^2^ are statistically about twice as large as those based on F, and R- 
 factors based on ALL data will be even larger. 
; 
 
_refine_ls_structure_factor_coef  Fsqd  
_refine_ls_matrix_type            full 
_refine_ls_weighting_scheme       calc  
_refine_ls_weighting_details 
 'calc w=1/[\s^2^(Fo^2^)+(0.0709P)^2^+0.0000P] where P=(Fo^2^+2Fc^2^)/3' 
_atom_sites_solution_primary      direct 
_atom_sites_solution_secondary    difmap 
_atom_sites_solution_hydrogens    geom 
_refine_ls_hydrogen_treatment     constr 
_refine_ls_extinction_method      none 
_refine_ls_extinction_coef        ? 
_refine_ls_number_reflns          21066 
_refine_ls_number_parameters      1459 
_refine_ls_number_restraints      990 
_refine_ls_R_factor_all           0.0899 
_refine_ls_R_factor_gt            0.0644 
_refine_ls_wR_factor_ref          0.1683 
_refine_ls_wR_factor_gt           0.1588 
_refine_ls_goodness_of_fit_ref    1.024 
_refine_ls_restrained_S_all       1.018 
_refine_ls_shift/su_max           0.037 
_refine_ls_shift/su_mean          0.001 
 
loop_ 
 _atom_site_label 
 _atom_site_type_symbol 
 _atom_site_fract_x 
 _atom_site_fract_y 
 _atom_site_fract_z 
 _atom_site_U_iso_or_equiv 
 _atom_site_adp_type 
 _atom_site_occupancy 
 _atom_site_symmetry_multiplicity 
 _atom_site_calc_flag 
 _atom_site_refinement_flags 
 _atom_site_disorder_assembly 
 _atom_site_disorder_group 
Nd1 Nd 0.75613(4) 0.71079(3) 0.379343(16) 0.02025(13) Uani 1 1 d . . . 
Nd2 Nd 0.43940(4) 0.60984(3) 0.035094(16) 0.01733(12) Uani 1 1 d . . . 
Nd3 Nd 0.88414(4) 0.49526(3) 0.309185(16) 0.01991(13) Uani 1 1 d . . . 
Nd4 Nd 0.45372(4) 0.88984(3) 0.035805(16) 0.01995(13) Uani 1 1 d . . . 
Nd5 Nd 0.89265(5) 0.20516(3) 0.289542(17) 0.02404(14) Uani 1 1 d . . . 
Nd6 Nd 0.80166(5) 0.98619(3) 0.356736(17) 0.02356(14) Uani 1 1 d . . . 
C1 C -0.0936(8) 1.1822(5) -0.0206(3) 0.0182(19) Uani 1 1 d U . . 
C2 C 0.0028(8) 1.2171(5) -0.0318(3) 0.021(2) Uani 1 1 d U . . 
H2A H -0.0106 1.2633 -0.0491 0.026 Uiso 1 1 calc R . . 
C3 C 0.1185(8) 1.1853(5) -0.0181(3) 0.022(2) Uani 1 1 d U . . 
H3A H 0.1840 1.2085 -0.0266 0.026 Uiso 1 1 calc R . . 
C4 C 0.1361(8) 1.1163(5) 0.0094(3) 0.0186(19) Uani 1 1 d U . . 
C5 C 0.0374(8) 1.0836(6) 0.0218(3) 0.026(2) Uani 1 1 d U . . 
H5A H 0.0484 1.0390 0.0405 0.031 Uiso 1 1 calc R . . 
C6 C -0.0772(8) 1.1154(5) 0.0072(3) 0.026(2) Uani 1 1 d U . . 
H6A H -0.1431 1.0925 0.0159 0.031 Uiso 1 1 calc R . . 
C7 C -0.2159(8) 1.2143(5) -0.0400(3) 0.020(2) Uani 1 1 d U . . 
C8 C 0.2651(8) 1.0798(6) 0.0238(3) 0.024(2) Uani 1 1 d U . . 
C9 C 1.4343(8) -0.0802(5) 0.3493(3) 0.0191(19) Uani 1 1 d U . . 
C10 C 1.4306(8) -0.0212(5) 0.3157(3) 0.025(2) Uani 1 1 d U . . 
H10A H 1.5034 -0.0058 0.3043 0.030 Uiso 1 1 calc R . . 
C11 C 1.3207(8) 0.0137(5) 0.2995(3) 0.025(2) Uani 1 1 d U . . 
H11A H 1.3184 0.0540 0.2778 0.030 Uiso 1 1 calc R . . 
C12 C 1.2133(8) -0.0095(5) 0.3146(3) 0.021(2) Uani 1 1 d U . . 
C13 C 1.2166(8) -0.0707(5) 0.3472(3) 0.024(2) Uani 1 1 d U . . 
H13A H 1.1449 -0.0878 0.3573 0.028 Uiso 1 1 calc R . . 
C14 C 1.3269(8) -0.1045(5) 0.3638(3) 0.025(2) Uani 1 1 d U . . 
H14A H 1.3296 -0.1450 0.3854 0.030 Uiso 1 1 calc R . . 
C15 C 1.5547(8) -0.1161(6) 0.3691(3) 0.024(2) Uani 1 1 d U . . 
C16 C 1.0881(9) 0.0335(6) 0.2978(3) 0.026(2) Uani 1 1 d U . . 
C17 C 1.3299(8) 0.3249(6) 0.3052(3) 0.025(2) Uani 1 1 d U . . 
H17A H 1.3106 0.3756 0.2933 0.030 Uiso 1 1 calc R . . 
C18 C 1.4468(9) 0.2925(6) 0.3175(3) 0.029(2) Uani 1 1 d U . . 
H18A H 1.5064 0.3206 0.3138 0.034 Uiso 1 1 calc R . . 
C19 C 1.4757(8) 0.2161(5) 0.3359(3) 0.022(2) Uani 1 1 d U . . 
C20 C 1.3855(8) 0.1765(6) 0.3419(3) 0.029(2) Uani 1 1 d U . . 
H20A H 1.4034 0.1266 0.3550 0.035 Uiso 1 1 calc R . . 
C21 C 1.2688(9) 0.2094(6) 0.3288(3) 0.029(2) Uani 1 1 d U . . 
H21A H 1.2092 0.1813 0.3324 0.035 Uiso 1 1 calc R . . 
C22 C 1.2401(8) 0.2846(5) 0.3100(3) 0.021(2) Uani 1 1 d U . . 
C23 C 1.6097(9) 0.1780(6) 0.3474(3) 0.028(2) Uani 1 1 d U . . 
C24 C 1.1144(8) 0.3169(5) 0.2934(3) 0.0194(19) Uani 1 1 d U . . 
C25 C 0.2838(8) 0.8855(5) -0.1663(3) 0.022(2) Uani 1 1 d U . . 
H25A H 0.2534 0.8432 -0.1699 0.026 Uiso 1 1 calc R . . 
C26 C 0.3194(8) 0.8960(5) -0.1248(3) 0.023(2) Uani 1 1 d U . . 
H26A H 0.3112 0.8609 -0.1006 0.028 Uiso 1 1 calc R . . 
C27 C 0.3664(8) 0.9572(5) -0.1186(3) 0.021(2) Uani 1 1 d U . . 
C28 C 0.3786(8) 1.0091(5) -0.1558(3) 0.024(2) Uani 1 1 d U . . 
H28A H 0.4116 1.0505 -0.1527 0.029 Uiso 1 1 calc R . . 
C29 C 0.3418(8) 0.9991(5) -0.1972(3) 0.022(2) Uani 1 1 d U . . 
H29A H 0.3499 1.0341 -0.2215 0.026 Uiso 1 1 calc R . . 
C30 C 0.2936(8) 0.9383(5) -0.2028(3) 0.0192(19) Uani 1 1 d U . . 
C31 C 0.4083(8) 0.9679(5) -0.0738(3) 0.023(2) Uani 1 1 d U . . 
C32 C 0.2502(8) 0.9283(5) -0.2473(3) 0.021(2) Uani 1 1 d U . . 
C33 C 0.9759(8) 0.7970(6) 0.5524(3) 0.027(2) Uani 1 1 d U . . 
H33A H 0.9623 0.7653 0.5780 0.033 Uiso 1 1 calc R . . 
C34 C 0.9406(8) 0.7846(5) 0.5116(3) 0.023(2) Uani 1 1 d U . . 
H34A H 0.9040 0.7445 0.5096 0.028 Uiso 1 1 calc R . . 
C35 C 0.9600(8) 0.8329(5) 0.4729(3) 0.0176(19) Uani 1 1 d U . . 
C36 C 1.0174(8) 0.8913(5) 0.4764(3) 0.025(2) Uani 1 1 d U . . 
H36A H 1.0316 0.9228 0.4508 0.030 Uiso 1 1 calc R . . 
C37 C 1.0535(8) 0.9030(5) 0.5170(3) 0.026(2) Uani 1 1 d U . . 
H37A H 1.0925 0.9421 0.5186 0.032 Uiso 1 1 calc R . . 
C38 C 1.0322(8) 0.8568(5) 0.5559(3) 0.021(2) Uani 1 1 d U . . 
C39 C 0.9112(8) 0.8250(5) 0.4291(3) 0.0189(19) Uani 1 1 d U . . 
C40 C 1.0682(9) 0.8741(6) 0.6005(3) 0.027(2) Uani 1 1 d U . . 
C41 C 1.3554(9) 0.6734(6) 0.3508(3) 0.033(2) Uani 1 1 d U . . 
H41A H 1.3808 0.7171 0.3556 0.039 Uiso 1 1 calc R . . 
C42 C 1.2333(9) 0.6825(6) 0.3434(3) 0.029(2) Uani 1 1 d U . . 
H42A H 1.1760 0.7322 0.3439 0.035 Uiso 1 1 calc R . . 
C43 C 1.1961(8) 0.6181(5) 0.3352(3) 0.022(2) Uani 1 1 d U . . 
C44 C 1.2810(9) 0.5462(6) 0.3344(3) 0.030(2) Uani 1 1 d U . . 
H44A H 1.2568 0.5025 0.3285 0.036 Uiso 1 1 calc R . . 
C45 C 1.4021(9) 0.5370(6) 0.3422(3) 0.031(2) Uani 1 1 d U . . 
H45A H 1.4591 0.4872 0.3414 0.037 Uiso 1 1 calc R . . 
C46 C 1.4401(8) 0.6000(5) 0.3510(3) 0.022(2) Uani 1 1 d U . . 
C47 C 1.5705(8) 0.5898(6) 0.3614(3) 0.025(2) Uani 1 1 d U . . 
C48 C 1.0611(8) 0.6274(6) 0.3263(3) 0.024(2) Uani 1 1 d U . . 
C49 C 0.6266(8) 0.3383(5) 0.1401(3) 0.024(2) Uani 1 1 d U . . 
H49A H 0.5976 0.2988 0.1306 0.029 Uiso 1 1 calc R . . 
C50 C 0.6374(8) 0.4006(5) 0.1102(3) 0.021(2) Uani 1 1 d U . . 
C51 C 0.6807(8) 0.4590(6) 0.1242(3) 0.026(2) Uani 1 1 d U . . 
H51A H 0.6868 0.5010 0.1046 0.031 Uiso 1 1 calc R . . 
C52 C 0.6587(8) 0.3347(5) 0.1835(3) 0.023(2) Uani 1 1 d U . . 
H52A H 0.6503 0.2934 0.2034 0.027 Uiso 1 1 calc R . . 
C53 C 0.6009(8) 0.4029(5) 0.0632(3) 0.0196(19) Uani 1 1 d U . . 
C54 C 0.7461(8) 0.3886(5) 0.2442(3) 0.0182(19) Uani 1 1 d U . . 
C55 C 0.7151(8) 0.4552(5) 0.1673(3) 0.025(2) Uani 1 1 d U . . 
H55A H 0.7460 0.4941 0.1764 0.030 Uiso 1 1 calc R . . 
C56 C 0.7036(8) 0.3932(5) 0.1972(3) 0.0184(19) Uani 1 1 d U . . 
C57 C 0.5855(7) 0.7194(5) 0.0974(3) 0.0151(18) Uani 1 1 d U . . 
C58 C 0.6270(8) 0.7143(5) 0.1440(3) 0.0169(19) Uani 1 1 d U . . 
C59 C 0.6089(8) 0.6549(5) 0.1747(3) 0.023(2) Uani 1 1 d U . . 
H59A H 0.5728 0.6181 0.1661 0.028 Uiso 1 1 calc R . . 
C60 C 0.6441(8) 0.6499(5) 0.2181(3) 0.024(2) Uani 1 1 d U . . 
H60A H 0.6357 0.6083 0.2378 0.029 Uiso 1 1 calc R . . 
C61 C 0.6916(8) 0.7065(5) 0.2319(3) 0.0192(19) Uani 1 1 d U . . 
C62 C 0.7093(8) 0.7665(6) 0.2014(3) 0.027(2) Uani 1 1 d U . . 
H62A H 0.7424 0.8045 0.2103 0.033 Uiso 1 1 calc R . . 
C63 C 0.6772(8) 0.7693(5) 0.1576(3) 0.024(2) Uani 1 1 d U . . 
H63A H 0.6899 0.8092 0.1372 0.029 Uiso 1 1 calc R . . 
C64 C 0.7270(8) 0.7028(6) 0.2800(3) 0.025(2) Uani 1 1 d U . . 
C65 C 0.9842(8) 0.4362(6) 0.4811(3) 0.030(2) Uani 1 1 d U . . 
H65A H 0.9739 0.3925 0.4683 0.036 Uiso 1 1 calc R . . 
C66 C 0.9832(9) 0.5694(6) 0.4757(3) 0.030(2) Uani 1 1 d U . . 
H66A H 0.9723 0.6165 0.4594 0.036 Uiso 1 1 calc R . . 
C67 C 0.9666(8) 0.5051(5) 0.4563(3) 0.022(2) Uani 1 1 d U . . 
C68 C 0.9295(8) 0.5105(6) 0.4092(3) 0.024(2) Uani 1 1 d U . . 
C69 C 0.6236(12) 0.5237(7) 0.5369(4) 0.061(2) Uani 1 1 d U . . 
H69A H 0.6150 0.4986 0.5101 0.091 Uiso 1 1 calc R . . 
H69B H 0.5473 0.5312 0.5594 0.091 Uiso 1 1 calc R . . 
H69C H 0.6945 0.4915 0.5499 0.091 Uiso 1 1 calc R . . 
C70 C 0.6587(12) 0.6472(7) 0.5592(4) 0.061(2) Uani 1 1 d U . . 
H70A H 0.6695 0.6958 0.5460 0.091 Uiso 1 1 calc R . . 
H70B H 0.7318 0.6199 0.5727 0.091 Uiso 1 1 calc R . . 
H70C H 0.5840 0.6573 0.5826 0.091 Uiso 1 1 calc R . . 
C71 C 0.6552(11) 0.6214(7) 0.4796(4) 0.050(2) Uani 1 1 d U . . 
C72 C 0.6080(11) 0.8708(7) 0.5348(4) 0.052(2) Uani 1 1 d U . . 
H72A H 0.5906 0.8403 0.5122 0.079 Uiso 1 1 calc R . . 
H72B H 0.5329 0.8896 0.5575 0.079 Uiso 1 1 calc R . . 
H72C H 0.6754 0.8388 0.5497 0.079 Uiso 1 1 calc R . . 
C73 C 0.6766(11) 0.9861(7) 0.5416(4) 0.051(2) Uani 1 1 d U . . 
H73A H 0.7007 1.0281 0.5240 0.076 Uiso 1 1 calc R . . 
H73B H 0.7458 0.9561 0.5563 0.076 Uiso 1 1 calc R . . 
H73C H 0.6036 1.0074 0.5648 0.076 Uiso 1 1 calc R . . 
C74 C 0.6555(10) 0.9400(7) 0.4666(4) 0.0458(19) Uani 1 1 d U . . 
C75 C 0.9890(12) 0.2406(8) 0.1075(5) 0.065(2) Uani 1 1 d U . . 
H75A H 0.9643 0.1986 0.1249 0.098 Uiso 1 1 calc R . . 
H75B H 1.0629 0.2194 0.0847 0.098 Uiso 1 1 calc R . . 
H75C H 0.9206 0.2705 0.0923 0.098 Uiso 1 1 calc R . . 
C76 C 1.0586(12) 0.3575(7) 0.1174(4) 0.062(2) Uani 1 1 d U . . 
H76A H 1.0759 0.3849 0.1415 0.094 Uiso 1 1 calc R . . 
H76B H 0.9927 0.3920 0.1028 0.094 Uiso 1 1 calc R . . 
H76C H 1.1344 0.3399 0.0948 0.094 Uiso 1 1 calc R . . 
C77 C 1.0071(11) 0.2782(7) 0.1830(4) 0.053(2) Uani 1 1 d U . . 
C78 C 0.9668(8) 0.4352(5) -0.0100(3) 0.023(2) Uani 1 1 d U . . 
H78A H 0.9442 0.3912 -0.0165 0.028 Uiso 1 1 calc R . . 
C79 C 0.9130(8) 0.5724(5) 0.0024(3) 0.023(2) Uani 1 1 d U . . 
H79A H 0.8538 0.6214 0.0044 0.028 Uiso 1 1 calc R . . 
C80 C 0.7452(8) 0.5159(5) -0.0179(3) 0.021(2) Uani 1 1 d U . . 
C81 C 0.3446(12) 0.8741(8) 0.2178(5) 0.067(2) Uani 1 1 d U . . 
H81A H 0.3683 0.9152 0.1991 0.101 Uiso 1 1 calc R . . 
H81B H 0.4143 0.8452 0.2326 0.101 Uiso 1 1 calc R . . 
H81C H 0.2720 0.8962 0.2409 0.101 Uiso 1 1 calc R . . 
C82 C 0.2738(12) 0.7573(8) 0.2124(5) 0.065(2) Uani 1 1 d U . . 
H82A H 0.2557 0.7277 0.1894 0.098 Uiso 1 1 calc R . . 
H82B H 0.1987 0.7763 0.2350 0.098 Uiso 1 1 calc R . . 
H82C H 0.3405 0.7243 0.2272 0.098 Uiso 1 1 calc R . . 
C83 C 0.3243(11) 0.8309(8) 0.1452(4) 0.058(2) Uani 1 1 d U . . 
H83A H 0.3046 0.7942 0.1289 0.069 Uiso 1 1 calc R . . 
C84 C 0.3314(10) 0.5354(7) 0.2131(4) 0.048(2) Uani 1 1 d U . . 
H84A H 0.3445 0.5841 0.2011 0.072 Uiso 1 1 calc R . . 
H84B H 0.4026 0.5066 0.2272 0.072 Uiso 1 1 calc R . . 
H84C H 0.2552 0.5454 0.2358 0.072 Uiso 1 1 calc R . . 
C85 C 0.2949(10) 0.4150(6) 0.1868(4) 0.0441(19) Uani 1 1 d U . . 
H85A H 0.2862 0.3930 0.1589 0.066 Uiso 1 1 calc R . . 
H85B H 0.2179 0.4218 0.2089 0.066 Uiso 1 1 calc R . . 
H85C H 0.3645 0.3804 0.1994 0.066 Uiso 1 1 calc R . . 
C86 C 0.3364(9) 0.5164(6) 0.1323(4) 0.0369(18) Uani 1 1 d U . . 
H86A H 0.3305 0.4844 0.1093 0.044 Uiso 1 1 calc R . . 
C87 C 0.9893(10) 0.5723(7) 0.1304(4) 0.047(2) Uani 1 1 d U . . 
H87A H 0.9720 0.5247 0.1426 0.070 Uiso 1 1 calc R . . 
H87B H 1.0653 0.5601 0.1075 0.070 Uiso 1 1 calc R . . 
H87C H 0.9192 0.6031 0.1164 0.070 Uiso 1 1 calc R . . 
C88 C 1.0359(10) 0.6906(6) 0.1547(4) 0.046(2) Uani 1 1 d U . . 
H88A H 1.0481 0.7130 0.1818 0.070 Uiso 1 1 calc R . . 
H88B H 0.9666 0.7259 0.1422 0.070 Uiso 1 1 calc R . . 
H88C H 1.1120 0.6814 0.1320 0.070 Uiso 1 1 calc R . . 
C89 C 0.9896(9) 0.5923(6) 0.2103(4) 0.0365(18) Uani 1 1 d U . . 
H89A H 0.9959 0.6249 0.2328 0.044 Uiso 1 1 calc R . . 
C90 C 0.8783(8) 0.5081(5) -0.0082(3) 0.0194(19) Uani 1 1 d U . . 
C91 C 0.0477(11) 1.0173(7) 0.1572(4) 0.059(2) Uani 1 1 d U . . 
H91A H 0.0594 1.0336 0.1862 0.088 Uiso 1 1 calc R . . 
H91B H -0.0159 1.0579 0.1449 0.088 Uiso 1 1 calc R . . 
H91C H 0.1265 1.0069 0.1358 0.088 Uiso 1 1 calc R . . 
C92 C -0.0146(11) 0.9158(7) 0.1236(4) 0.056(2) Uani 1 1 d U . . 
H92A H -0.0405 0.8694 0.1322 0.084 Uiso 1 1 calc R . . 
H92B H 0.0622 0.9029 0.1011 0.084 Uiso 1 1 calc R . . 
H92C H -0.0803 0.9534 0.1105 0.084 Uiso 1 1 calc R . . 
C93 C -0.0149(11) 0.9171(7) 0.2057(4) 0.052(2) Uani 1 1 d U . . 
H93A H -0.0021 0.9407 0.2311 0.063 Uiso 1 1 calc R . . 
C94 C 0.3646(13) 0.7989(8) 0.5065(5) 0.071(2) Uani 1 1 d U . . 
H94A H 0.3738 0.8160 0.5358 0.106 Uiso 1 1 calc R . . 
H94B H 0.3013 0.8388 0.4936 0.106 Uiso 1 1 calc R . . 
H94C H 0.4444 0.7891 0.4857 0.106 Uiso 1 1 calc R . . 
C95 C 0.3112(12) 0.6952(8) 0.4715(5) 0.069(2) Uani 1 1 d U . . 
H95A H 0.2858 0.6482 0.4783 0.104 Uiso 1 1 calc R . . 
H95B H 0.3908 0.6836 0.4505 0.104 Uiso 1 1 calc R . . 
H95C H 0.2476 0.7329 0.4574 0.104 Uiso 1 1 calc R . . 
C96 C 0.3013(12) 0.6960(8) 0.5532(5) 0.066(2) Uani 1 1 d U . . 
H96A H 0.3107 0.7208 0.5788 0.079 Uiso 1 1 calc R . . 
C97 C 0.6420(10) 0.8011(7) 0.8037(4) 0.048(2) Uani 1 1 d U . . 
H97A H 0.6126 0.7557 0.8114 0.072 Uiso 1 1 calc R . . 
H97B H 0.7199 0.7871 0.7818 0.072 Uiso 1 1 calc R . . 
H97C H 0.5789 0.8404 0.7903 0.072 Uiso 1 1 calc R . . 
C98 C 0.7059(10) 0.9009(7) 0.8378(4) 0.047(2) Uani 1 1 d U . . 
H98A H 0.7161 0.9176 0.8670 0.071 Uiso 1 1 calc R . . 
H98B H 0.6439 0.9415 0.8248 0.071 Uiso 1 1 calc R . . 
H98C H 0.7858 0.8898 0.8170 0.071 Uiso 1 1 calc R . . 
C99 C 0.6351(10) 0.7986(7) 0.8858(4) 0.0404(19) Uani 1 1 d U . . 
H99A H 0.6463 0.8225 0.9114 0.049 Uiso 1 1 calc R . . 
N1 N 0.6451(9) 0.5999(6) 0.5234(4) 0.0534(19) Uani 1 1 d U . . 
N2 N 0.6464(8) 0.9374(5) 0.5118(3) 0.0414(17) Uani 1 1 d U . . 
N3 N 1.0169(9) 0.2891(6) 0.1375(3) 0.0522(19) Uani 1 1 d U . . 
N4 N 0.0077(9) 0.9482(6) 0.1640(3) 0.0499(19) Uani 1 1 d U . . 
N5 N 0.3147(9) 0.8242(6) 0.1898(4) 0.0527(19) Uani 1 1 d U . . 
N6 N 0.3195(8) 0.4910(5) 0.1763(3) 0.0394(16) Uani 1 1 d U . . 
N7 N 1.0063(8) 0.6156(5) 0.1672(3) 0.0371(16) Uani 1 1 d U . . 
N8 N 0.3250(10) 0.7264(7) 0.5133(4) 0.063(2) Uani 1 1 d U . . 
N9 N 0.6638(8) 0.8310(5) 0.8447(3) 0.0394(17) Uani 1 1 d U . . 
O1 O -0.2799(6) 1.1672(4) -0.0421(2) 0.0369(17) Uani 1 1 d U . . 
O2 O -0.2444(6) 1.2832(4) -0.0548(2) 0.0266(15) Uani 1 1 d U . . 
O3 O 0.3464(6) 1.1155(4) 0.0148(2) 0.0303(16) Uani 1 1 d U . . 
O4 O 0.2789(6) 1.0147(4) 0.0437(2) 0.0312(16) Uani 1 1 d U . . 
O5 O 1.5616(6) -0.1767(4) 0.3931(2) 0.0282(15) Uani 1 1 d U . . 
O6 O 1.6401(6) -0.0839(4) 0.3611(2) 0.0417(19) Uani 1 1 d U . . 
O7 O 0.9949(6) 0.0073(4) 0.3100(2) 0.0347(17) Uani 1 1 d U . . 
O8 O 1.0861(6) 0.0910(4) 0.2730(2) 0.0344(17) Uani 1 1 d U . . 
O9 O 1.6254(6) 0.1102(4) 0.3636(2) 0.0364(17) Uani 1 1 d U . . 
O10 O 1.6882(6) 0.2148(4) 0.3404(2) 0.0304(16) Uani 1 1 d U . . 
O11 O 1.0799(6) 0.3891(4) 0.2856(2) 0.0280(15) Uani 1 1 d U . . 
O12 O 1.0564(6) 0.2711(4) 0.2852(2) 0.0340(17) Uani 1 1 d U . . 
O14 O 0.2579(6) 0.9804(4) -0.2779(2) 0.0352(17) Uani 1 1 d U . . 
O15 O 0.4489(6) 1.0255(4) -0.0708(2) 0.0356(17) Uani 1 1 d U . . 
O16 O 0.3952(6) 0.9188(4) -0.0421(2) 0.0327(16) Uani 1 1 d U . . 
O17 O 1.1151(6) 0.9288(4) 0.6005(2) 0.0367(17) Uani 1 1 d U . . 
O18 O 1.0461(6) 0.8297(4) 0.6349(2) 0.0386(18) Uani 1 1 d U . . 
O19 O 0.9293(6) 0.8729(4) 0.3969(2) 0.0316(16) Uani 1 1 d U . . 
O20 O 0.8590(6) 0.7733(4) 0.4273(2) 0.0318(16) Uani 1 1 d U . . 
O21 O 1.6566(6) 0.5260(4) 0.3503(2) 0.0361(17) Uani 1 1 d U . . 
O22 O 1.5876(6) 0.6457(4) 0.3810(2) 0.0317(16) Uani 1 1 d U . . 
O23 O 0.9758(6) 0.6914(4) 0.3367(2) 0.0298(16) Uani 1 1 d U . . 
O24 O 1.0453(6) 0.5684(4) 0.3095(2) 0.0317(16) Uani 1 1 d U . . 
O25 O 0.6280(6) 0.3403(4) 0.0416(2) 0.0272(15) Uani 1 1 d U . . 
O26 O 0.5476(5) 0.4683(3) 0.04621(19) 0.0192(13) Uani 1 1 d U . . 
O27 O 0.7452(6) 0.3287(4) 0.2681(2) 0.0286(15) Uani 1 1 d U . . 
O28 O 0.7758(6) 0.4452(4) 0.2558(2) 0.0335(16) Uani 1 1 d U . . 
O29 O 0.5451(6) 0.6661(4) 0.0863(2) 0.0267(15) Uani 1 1 d U . . 
O30 O 0.5976(5) 0.7779(4) 0.0722(2) 0.0244(14) Uani 1 1 d U . . 
O31 O 0.7093(6) 0.7651(4) 0.2999(2) 0.0305(16) Uani 1 1 d U . . 
O32 O 0.7696(5) 0.6370(4) 0.2986(2) 0.0235(14) Uani 1 1 d U . . 
O33 O 0.9648(6) 0.4482(4) 0.3859(2) 0.0372(17) Uani 1 1 d U . . 
O34 O 0.8698(5) 0.5740(4) 0.3940(2) 0.0240(14) Uani 1 1 d U . . 
O35 O 0.6742(6) 0.6843(4) 0.4655(2) 0.0380(18) Uani 1 1 d U . . 
O36 O 0.6943(7) 0.9912(5) 0.4437(3) 0.049(2) Uani 1 1 d U . . 
O37 O 0.9693(7) 0.2236(5) 0.2028(3) 0.0453(19) Uani 1 1 d U . . 
O38 O 0.6616(6) 0.5791(4) -0.0072(2) 0.0278(15) Uani 1 1 d U . . 
O39 O 0.3603(7) 0.8867(5) 0.1231(3) 0.047(2) Uani 1 1 d U . . 
O40 O 0.3590(6) 0.5787(4) 0.1200(2) 0.0312(16) Uani 1 1 d U . . 
O41 O 0.9659(6) 0.5300(4) 0.2236(2) 0.0320(16) Uani 1 1 d U . . 
O43 O 0.7307(6) 0.4576(4) -0.0358(2) 0.0266(15) Uani 1 1 d U . . 
O44 O -0.0520(8) 0.8586(5) 0.2120(3) 0.065(3) Uani 1 1 d U . . 
O45 O 0.2667(9) 0.6357(6) 0.5603(3) 0.074(3) Uani 1 1 d U . . 
O46 O 0.2080(6) 0.8714(4) -0.2505(2) 0.0342(17) Uani 1 1 d U . . 
O47 O 0.5968(7) 0.7426(5) 0.8935(3) 0.052(2) Uani 1 1 d U . . 
O1W O 0.8986(7) 0.8708(5) 0.3078(3) 0.054(2) Uani 1 1 d U . . 
H1WA H 0.9793 0.8579 0.3048 0.065 Uiso 1 1 d R . . 
H1WB H 0.8770 0.8787 0.2812 0.065 Uiso 1 1 d R . . 
O2W O 0.8140(5) 0.3770(3) 0.34790(19) 0.0208(13) Uani 1 1 d U . . 
H2WA H 0.7335 0.3920 0.3552 0.025 Uiso 1 1 d R . . 
H2WB H 0.8436 0.3671 0.3730 0.025 Uiso 1 1 d R . . 
H3WA H 0.5905 0.7048 -0.0125 0.025 Uiso 1 1 d R . . 
H3WB H 0.5142 0.7611 -0.0369 0.025 Uiso 1 1 d R . . 
O3W O 0.5231(6) 0.7459(4) -0.0084(2) 0.0364(17) Uani 1 1 d U . . 
 
loop_ 
 _atom_site_aniso_label 
 _atom_site_aniso_U_11 
 _atom_site_aniso_U_22 
 _atom_site_aniso_U_33 
 _atom_site_aniso_U_23 
 _atom_site_aniso_U_13 
 _atom_site_aniso_U_12 
Nd1 0.0209(3) 0.0222(3) 0.0178(3) -0.0026(2) -0.0092(2) -0.0024(2) 
Nd2 0.0182(2) 0.0159(3) 0.0176(2) -0.00172(19) -0.00728(19) -0.0016(2) 
Nd3 0.0222(3) 0.0180(3) 0.0193(3) 0.0009(2) -0.0088(2) -0.0024(2) 
Nd4 0.0229(3) 0.0201(3) 0.0195(3) 0.0070(2) -0.0111(2) -0.0071(2) 
Nd5 0.0246(3) 0.0317(3) 0.0187(3) 0.0089(2) -0.0106(2) -0.0102(2) 
Nd6 0.0256(3) 0.0251(3) 0.0204(3) 0.0060(2) -0.0096(2) -0.0056(2) 
C1 0.018(2) 0.017(3) 0.018(2) -0.0009(18) -0.0026(18) -0.0042(18) 
C2 0.021(3) 0.020(3) 0.022(3) 0.0008(18) -0.0034(18) -0.0055(18) 
C3 0.021(3) 0.022(3) 0.023(3) 0.0001(18) -0.0035(18) -0.0071(18) 
C4 0.019(2) 0.018(3) 0.019(2) -0.0016(18) -0.0043(18) -0.0042(18) 
C5 0.027(3) 0.025(3) 0.026(3) 0.0022(18) -0.0050(18) -0.0078(19) 
C6 0.026(3) 0.026(3) 0.027(3) 0.0018(18) -0.0040(18) -0.0090(19) 
C7 0.019(2) 0.021(3) 0.019(3) -0.0001(18) -0.0026(18) -0.0038(18) 
C8 0.025(3) 0.025(3) 0.023(3) -0.0016(18) -0.0050(18) -0.0062(19) 
C9 0.019(2) 0.019(3) 0.019(2) -0.0009(18) -0.0031(18) -0.0047(18) 
C10 0.024(3) 0.025(3) 0.026(3) 0.0007(18) -0.0032(18) -0.0083(19) 
C11 0.025(3) 0.024(3) 0.025(3) 0.0003(18) -0.0045(18) -0.0074(19) 
C12 0.021(3) 0.020(3) 0.021(3) -0.0019(18) -0.0034(18) -0.0046(18) 
C13 0.023(3) 0.023(3) 0.024(3) 0.0008(18) -0.0032(18) -0.0072(18) 
C14 0.025(3) 0.024(3) 0.025(3) 0.0006(18) -0.0045(18) -0.0070(19) 
C15 0.024(3) 0.025(3) 0.024(3) 0.0000(18) -0.0036(18) -0.0063(19) 
C16 0.026(3) 0.027(3) 0.026(3) -0.0019(18) -0.0058(18) -0.0074(19) 
C17 0.025(3) 0.024(3) 0.026(3) 0.0011(18) -0.0043(18) -0.0063(19) 
C18 0.029(3) 0.028(3) 0.029(3) 0.0005(19) -0.0055(18) -0.0089(19) 
C19 0.023(3) 0.022(3) 0.021(3) -0.0011(18) -0.0028(18) -0.0042(18) 
C20 0.029(3) 0.028(3) 0.029(3) 0.0007(19) -0.0061(18) -0.0072(19) 
C21 0.030(3) 0.029(3) 0.030(3) 0.0007(19) -0.0062(19) -0.0076(19) 
C22 0.021(3) 0.020(3) 0.021(3) -0.0009(18) -0.0038(18) -0.0049(18) 
C23 0.028(3) 0.028(3) 0.026(3) -0.0012(19) -0.0041(18) -0.0061(19) 
C24 0.020(2) 0.019(3) 0.019(2) 0.0005(18) -0.0038(18) -0.0040(18) 
C25 0.023(3) 0.021(3) 0.022(3) 0.0006(18) -0.0048(18) -0.0067(18) 
C26 0.024(3) 0.023(3) 0.023(3) 0.0008(18) -0.0044(18) -0.0072(18) 
C27 0.021(3) 0.021(3) 0.022(3) 0.0004(18) -0.0046(18) -0.0049(18) 
C28 0.026(3) 0.023(3) 0.026(3) 0.0005(18) -0.0049(18) -0.0083(19) 
C29 0.024(3) 0.022(3) 0.021(3) 0.0007(18) -0.0056(18) -0.0062(18) 
C30 0.019(2) 0.019(3) 0.019(2) 0.0008(18) -0.0043(18) -0.0047(18) 
C31 0.023(3) 0.023(3) 0.024(3) -0.0008(18) -0.0059(18) -0.0050(18) 
C32 0.021(3) 0.021(3) 0.020(3) 0.0004(18) -0.0047(18) -0.0048(18) 
C33 0.029(3) 0.027(3) 0.025(3) 0.0014(18) -0.0050(18) -0.0071(19) 
C34 0.024(3) 0.023(3) 0.024(3) -0.0011(18) -0.0054(18) -0.0079(18) 
C35 0.018(2) 0.017(3) 0.016(2) -0.0008(18) -0.0025(18) -0.0033(18) 
C36 0.026(3) 0.025(3) 0.024(3) 0.0004(18) -0.0054(18) -0.0064(19) 
C37 0.027(3) 0.026(3) 0.027(3) 0.0002(18) -0.0051(18) -0.0092(19) 
C38 0.021(3) 0.022(3) 0.021(3) -0.0013(18) -0.0057(18) -0.0047(18) 
C39 0.019(2) 0.019(3) 0.018(2) -0.0002(18) -0.0032(18) -0.0030(18) 
C40 0.027(3) 0.027(3) 0.027(3) -0.0004(19) -0.0063(18) -0.0070(19) 
C41 0.032(3) 0.032(3) 0.035(3) -0.0011(19) -0.0060(19) -0.0105(19) 
C42 0.029(3) 0.028(3) 0.031(3) -0.0008(19) -0.0071(19) -0.0072(19) 
C43 0.022(3) 0.022(3) 0.023(3) -0.0011(18) -0.0045(18) -0.0068(18) 
C44 0.031(3) 0.029(3) 0.031(3) -0.0011(19) -0.0063(19) -0.0088(19) 
C45 0.030(3) 0.031(3) 0.031(3) -0.0002(19) -0.0062(19) -0.0082(19) 
C46 0.022(3) 0.022(3) 0.023(3) -0.0004(18) -0.0045(18) -0.0056(18) 
C47 0.025(3) 0.026(3) 0.025(3) -0.0006(18) -0.0030(18) -0.0078(19) 
C48 0.024(3) 0.024(3) 0.024(3) 0.0011(18) -0.0036(18) -0.0078(19) 
C49 0.026(3) 0.023(3) 0.024(3) -0.0004(18) -0.0061(18) -0.0076(19) 
C50 0.021(3) 0.021(3) 0.021(3) -0.0005(18) -0.0040(18) -0.0053(18) 
C51 0.027(3) 0.025(3) 0.026(3) 0.0013(18) -0.0057(18) -0.0076(19) 
C52 0.025(3) 0.022(3) 0.022(3) 0.0006(18) -0.0056(18) -0.0069(18) 
C53 0.020(2) 0.019(3) 0.019(3) 0.0007(18) -0.0029(18) -0.0060(18) 
C54 0.019(2) 0.017(3) 0.019(2) -0.0005(18) -0.0042(18) -0.0047(18) 
C55 0.027(3) 0.024(3) 0.026(3) -0.0005(18) -0.0065(18) -0.0076(19) 
C56 0.019(2) 0.018(3) 0.018(2) -0.0008(18) -0.0038(18) -0.0044(18) 
C57 0.015(2) 0.015(2) 0.016(2) 0.0005(18) -0.0035(17) -0.0039(18) 
C58 0.017(2) 0.016(2) 0.017(2) -0.0005(18) -0.0046(18) -0.0030(18) 
C59 0.024(3) 0.023(3) 0.024(3) 0.0001(18) -0.0055(18) -0.0078(18) 
C60 0.026(3) 0.023(3) 0.023(3) 0.0013(18) -0.0035(18) -0.0067(18) 
C61 0.020(2) 0.020(3) 0.017(2) 0.0001(18) -0.0041(18) -0.0036(18) 
C62 0.029(3) 0.027(3) 0.027(3) -0.0010(18) -0.0061(18) -0.0091(19) 
C63 0.026(3) 0.024(3) 0.022(3) 0.0010(18) -0.0062(18) -0.0067(18) 
C64 0.026(3) 0.024(3) 0.024(3) 0.0013(18) -0.0048(18) -0.0066(19) 
C65 0.032(3) 0.029(3) 0.030(3) 0.0003(19) -0.0077(19) -0.0082(19) 
C66 0.033(3) 0.029(3) 0.030(3) -0.0003(19) -0.0086(19) -0.0082(19) 
C67 0.023(3) 0.022(3) 0.021(3) -0.0002(18) -0.0065(18) -0.0051(18) 
C68 0.024(3) 0.024(3) 0.023(3) 0.0001(18) -0.0058(18) -0.0059(18) 
C69 0.062(3) 0.058(2) 0.061(3) 0.0049(17) -0.0075(19) -0.019(2) 
C70 0.063(3) 0.062(3) 0.056(3) -0.0021(18) -0.012(2) -0.016(2) 
C71 0.048(3) 0.050(3) 0.051(2) -0.0002(17) -0.0074(19) -0.0135(19) 
C72 0.053(3) 0.051(2) 0.053(3) 0.0031(17) -0.0060(18) -0.018(2) 
C73 0.051(3) 0.052(3) 0.051(3) -0.0036(18) -0.0097(19) -0.014(2) 
C74 0.045(3) 0.046(3) 0.044(2) -0.0008(16) -0.0067(18) -0.0100(19) 
C75 0.069(3) 0.066(3) 0.062(3) -0.0045(19) -0.013(2) -0.019(2) 
C76 0.063(3) 0.061(3) 0.062(3) 0.0054(18) -0.0074(19) -0.019(2) 
C77 0.051(3) 0.052(3) 0.053(2) 0.0012(17) -0.0080(19) -0.0123(19) 
C78 0.024(3) 0.022(3) 0.025(3) -0.0018(18) -0.0047(18) -0.0074(18) 
C79 0.023(3) 0.023(3) 0.024(3) 0.0001(18) -0.0046(18) -0.0056(18) 
C80 0.021(3) 0.022(3) 0.021(3) 0.0008(18) -0.0031(18) -0.0068(18) 
C81 0.070(3) 0.068(3) 0.066(3) -0.0058(19) -0.014(2) -0.020(2) 
C82 0.066(3) 0.064(3) 0.066(3) 0.0050(18) -0.0079(19) -0.020(2) 
C83 0.057(3) 0.058(3) 0.056(2) 0.0007(17) -0.0095(19) -0.014(2) 
C84 0.050(3) 0.049(3) 0.044(2) -0.0022(18) -0.0083(19) -0.0134(19) 
C85 0.045(3) 0.043(2) 0.044(3) 0.0043(16) -0.0050(18) -0.013(2) 
C86 0.035(3) 0.037(3) 0.0385(19) 0.0005(17) -0.0049(18) -0.0102(19) 
C87 0.049(3) 0.049(3) 0.042(2) -0.0024(18) -0.0088(19) -0.0128(19) 
C88 0.048(3) 0.044(2) 0.047(3) 0.0049(16) -0.0055(18) -0.015(2) 
C89 0.035(3) 0.036(3) 0.0368(19) -0.0001(17) -0.0054(18) -0.0089(19) 
C90 0.019(2) 0.019(3) 0.019(2) 0.0003(18) -0.0020(18) -0.0057(18) 
C91 0.059(3) 0.057(3) 0.061(3) -0.0009(17) -0.0082(19) -0.019(2) 
C92 0.058(3) 0.057(3) 0.054(2) -0.0019(18) -0.011(2) -0.0157(19) 
C93 0.052(3) 0.053(3) 0.052(2) -0.0022(18) -0.0088(18) -0.0134(19) 
C94 0.070(3) 0.069(3) 0.074(3) 0.0006(17) -0.0087(19) -0.023(2) 
C95 0.070(3) 0.071(3) 0.067(3) -0.0009(19) -0.012(2) -0.019(2) 
C96 0.065(3) 0.066(3) 0.065(2) 0.0005(18) -0.0102(19) -0.017(2) 
C97 0.051(3) 0.049(3) 0.045(2) -0.0023(18) -0.0100(19) -0.0128(19) 
C98 0.048(3) 0.046(2) 0.049(3) 0.0007(17) -0.0055(18) -0.016(2) 
C99 0.039(3) 0.041(3) 0.041(2) -0.0009(17) -0.0069(18) -0.0109(19) 
N1 0.054(3) 0.053(2) 0.052(2) 0.0013(15) -0.0079(18) -0.0136(19) 
N2 0.039(2) 0.042(2) 0.041(2) 0.0011(15) -0.0060(17) -0.0081(18) 
N3 0.050(3) 0.052(3) 0.051(2) 0.0016(16) -0.0072(18) -0.0111(18) 
N4 0.048(3) 0.050(2) 0.051(2) -0.0009(16) -0.0085(18) -0.0114(18) 
N5 0.051(3) 0.052(3) 0.052(2) 0.0007(16) -0.0078(18) -0.0110(18) 
N6 0.038(2) 0.040(2) 0.039(2) 0.0021(15) -0.0053(18) -0.0094(18) 
N7 0.036(2) 0.037(2) 0.036(2) 0.0024(15) -0.0053(17) -0.0084(18) 
N8 0.061(3) 0.062(3) 0.063(2) 0.0002(16) -0.0088(18) -0.0160(19) 
N9 0.038(2) 0.039(2) 0.040(2) -0.0002(15) -0.0056(17) -0.0090(18) 
O1 0.035(2) 0.037(2) 0.040(2) 0.0030(18) -0.0075(17) -0.0121(18) 
O2 0.026(2) 0.025(2) 0.027(2) 0.0017(17) -0.0031(16) -0.0048(17) 
O3 0.029(2) 0.033(2) 0.028(2) 0.0001(17) -0.0068(17) -0.0064(17) 
O4 0.030(2) 0.030(2) 0.033(2) 0.0004(17) -0.0094(17) -0.0055(17) 
O5 0.027(2) 0.027(2) 0.029(2) -0.0012(17) -0.0059(16) -0.0044(17) 
O6 0.041(2) 0.044(3) 0.043(2) 0.0017(18) -0.0109(18) -0.0143(18) 
O7 0.031(2) 0.039(2) 0.035(2) -0.0001(17) -0.0081(17) -0.0089(17) 
O8 0.033(2) 0.034(2) 0.035(2) 0.0007(17) -0.0080(17) -0.0059(17) 
O9 0.035(2) 0.035(2) 0.037(2) 0.0012(18) -0.0078(17) -0.0054(17) 
O10 0.028(2) 0.033(2) 0.029(2) 0.0022(17) -0.0052(17) -0.0075(17) 
O11 0.027(2) 0.027(2) 0.028(2) 0.0012(17) -0.0032(16) -0.0060(17) 
O12 0.032(2) 0.035(2) 0.036(2) 0.0028(17) -0.0069(17) -0.0100(17) 
O14 0.036(2) 0.038(2) 0.034(2) 0.0003(17) -0.0111(17) -0.0107(17) 
O15 0.036(2) 0.037(2) 0.036(2) -0.0022(17) -0.0112(17) -0.0102(17) 
O16 0.033(2) 0.036(2) 0.031(2) 0.0006(17) -0.0089(17) -0.0108(17) 
O17 0.039(2) 0.038(2) 0.036(2) -0.0019(17) -0.0113(17) -0.0105(18) 
O18 0.037(2) 0.042(2) 0.036(2) 0.0015(18) -0.0092(17) -0.0090(18) 
O19 0.033(2) 0.031(2) 0.029(2) -0.0007(17) -0.0076(17) -0.0040(17) 
O20 0.033(2) 0.034(2) 0.031(2) -0.0036(17) -0.0084(17) -0.0108(17) 
O21 0.032(2) 0.038(2) 0.039(2) -0.0014(18) -0.0057(17) -0.0110(17) 
O22 0.030(2) 0.034(2) 0.033(2) -0.0031(17) -0.0058(17) -0.0108(17) 
O23 0.029(2) 0.029(2) 0.031(2) -0.0016(17) -0.0050(17) -0.0072(17) 
O24 0.032(2) 0.033(2) 0.033(2) -0.0030(17) -0.0076(17) -0.0107(17) 
O25 0.031(2) 0.025(2) 0.026(2) -0.0019(17) -0.0080(16) -0.0071(17) 
O26 0.021(2) 0.019(2) 0.018(2) -0.0009(16) -0.0051(16) -0.0039(16) 
O27 0.032(2) 0.028(2) 0.027(2) 0.0018(17) -0.0073(17) -0.0085(17) 
O28 0.037(2) 0.034(2) 0.032(2) -0.0001(17) -0.0119(17) -0.0106(17) 
O29 0.030(2) 0.027(2) 0.026(2) 0.0008(17) -0.0080(16) -0.0107(17) 
O30 0.027(2) 0.024(2) 0.023(2) 0.0016(17) -0.0068(16) -0.0061(16) 
O31 0.036(2) 0.028(2) 0.028(2) -0.0029(17) -0.0090(17) -0.0063(17) 
O32 0.024(2) 0.022(2) 0.022(2) 0.0010(16) -0.0054(16) -0.0035(16) 
O33 0.041(2) 0.037(2) 0.034(2) -0.0001(18) -0.0118(17) -0.0070(17) 
O34 0.024(2) 0.024(2) 0.021(2) 0.0019(17) -0.0050(16) -0.0031(16) 
O35 0.038(2) 0.038(2) 0.036(2) 0.0004(18) -0.0061(17) -0.0096(18) 
O36 0.049(3) 0.047(3) 0.047(3) 0.0040(18) -0.0048(18) -0.0103(18) 
O37 0.045(2) 0.045(3) 0.044(3) 0.0009(18) -0.0061(18) -0.0119(18) 
O38 0.025(2) 0.027(2) 0.032(2) -0.0012(17) -0.0045(16) -0.0086(17) 
O39 0.047(3) 0.046(3) 0.045(3) 0.0024(18) -0.0052(18) -0.0123(18) 
O40 0.033(2) 0.030(2) 0.030(2) 0.0001(17) -0.0037(17) -0.0082(17) 
O41 0.033(2) 0.032(2) 0.030(2) 0.0002(17) -0.0047(17) -0.0080(17) 
O43 0.025(2) 0.028(2) 0.028(2) -0.0013(17) -0.0058(16) -0.0085(17) 
O44 0.066(3) 0.064(3) 0.063(3) 0.0005(19) -0.0097(19) -0.0177(19) 
O45 0.076(3) 0.073(3) 0.072(3) -0.0010(19) -0.0107(19) -0.023(2) 
O46 0.035(2) 0.035(2) 0.033(2) -0.0003(17) -0.0100(17) -0.0092(17) 
O47 0.054(3) 0.052(3) 0.050(3) -0.0009(18) -0.0088(18) -0.0156(19) 
O1W 0.055(3) 0.061(3) 0.051(3) 0.0016(18) -0.0179(18) -0.0216(19) 
O2W 0.0197(19) 0.032(2) 0.018(2) 0.0099(16) -0.0097(16) -0.0155(16) 
O3W 0.039(2) 0.033(2) 0.035(2) 0.0007(17) -0.0085(17) -0.0057(17) 
 
_geom_special_details 
; 
 All esds (except the esd in the dihedral angle between two l.s. planes) 
 are estimated using the full covariance matrix.  The cell esds are taken 
 into account individually in the estimation of esds in distances, angles 
 and torsion angles; correlations between esds in cell parameters are only 
 used when they are defined by crystal symmetry.  An approximate (isotropic) 
 treatment of cell esds is used for estimating esds involving l.s. planes. 
; 
 
loop_ 
 _geom_bond_atom_site_label_1 
 _geom_bond_atom_site_label_2 
 _geom_bond_distance 
 _geom_bond_site_symmetry_2 
 _geom_bond_publ_flag 
Nd1 O34 2.456(6) . ? 
Nd1 O20 2.457(6) . ? 
Nd1 O22 2.470(6) 1_455 ? 
Nd1 O23 2.478(6) . ? 
Nd1 O5 2.482(6) 1_465 ? 
Nd1 O31 2.553(6) . ? 
Nd1 O35 2.593(7) . ? 
Nd1 O32 2.738(6) . ? 
Nd1 C64 3.007(9) . ? 
Nd2 O2 2.446(6) 2_575 ? 
Nd2 O29 2.480(6) . ? 
Nd2 O38 2.483(6) . ? 
Nd2 O26 2.496(6) . ? 
Nd2 O43 2.520(6) 2_665 ? 
Nd2 O25 2.532(6) 2_665 ? 
Nd2 O40 2.577(6) . ? 
Nd2 O26 2.794(6) 2_665 ? 
Nd2 C53 3.028(9) 2_665 ? 
Nd3 O11 2.460(6) . ? 
Nd3 O28 2.486(6) . ? 
Nd3 O24 2.509(6) . ? 
Nd3 O32 2.512(6) . ? 
Nd3 O21 2.522(6) 1_455 ? 
Nd3 O33 2.578(6) . ? 
Nd3 O2W 2.590(5) . ? 
Nd3 O41 2.617(6) . ? 
Nd3 O34 2.887(6) . ? 
Nd4 O1 2.412(7) 2_575 ? 
Nd4 O3 2.426(6) 2_675 ? 
Nd4 O15 2.459(7) 2_675 ? 
Nd4 O16 2.474(6) . ? 
Nd4 O4 2.491(6) . ? 
Nd4 O30 2.493(6) . ? 
Nd4 O39 2.591(7) . ? 
Nd4 O3W 2.787(7) . ? 
Nd5 O12 2.422(7) . ? 
Nd5 O18 2.429(7) 2_766 ? 
Nd5 O46 2.444(7) 2_665 ? 
Nd5 O10 2.456(6) 1_455 ? 
Nd5 O27 2.464(6) . ? 
Nd5 O8 2.497(7) . ? 
Nd5 O37 2.568(7) . ? 
Nd6 O7 2.452(7) 1_565 ? 
Nd6 O1W 2.445(8) . ? 
Nd6 O6 2.454(7) 1_465 ? 
Nd6 O19 2.482(6) . ? 
Nd6 O17 2.488(7) 2_776 ? 
Nd6 O9 2.490(7) 1_465 ? 
Nd6 O14 2.511(6) 2_675 ? 
Nd6 O36 2.612(8) . ? 
C1 C2 1.373(11) . ? 
C1 C6 1.392(12) . ? 
C1 C7 1.516(11) . ? 
C2 C3 1.373(11) . ? 
C2 H2A 0.9300 . ? 
C3 C4 1.416(12) . ? 
C3 H3A 0.9300 . ? 
C4 C5 1.373(12) . ? 
C4 C8 1.521(12) . ? 
C5 C6 1.373(12) . ? 
C5 H5A 0.9300 . ? 
C6 H6A 0.9300 . ? 
C7 O2 1.250(10) . ? 
C7 O1 1.259(10) . ? 
C8 O3 1.235(10) . ? 
C8 O4 1.250(10) . ? 
C9 C14 1.378(11) . ? 
C9 C10 1.398(12) . ? 
C9 C15 1.513(12) . ? 
C10 C11 1.358(12) . ? 
C10 H10A 0.9300 . ? 
C11 C12 1.369(11) . ? 
C11 H11A 0.9300 . ? 
C12 C13 1.406(12) . ? 
C12 C16 1.537(12) . ? 
C13 C14 1.365(11) . ? 
C13 H13A 0.9300 . ? 
C14 H14A 0.9300 . ? 
C15 O6 1.230(11) . ? 
C15 O5 1.245(10) . ? 
C16 O8 1.221(11) . ? 
C16 O7 1.245(10) . ? 
C17 C18 1.368(12) . ? 
C17 C22 1.375(12) . ? 
C17 H17A 0.9300 . ? 
C18 C19 1.405(12) . ? 
C18 H18A 0.9300 . ? 
C19 C20 1.370(12) . ? 
C19 C23 1.541(12) . ? 
C20 C21 1.378(12) . ? 
C20 H20A 0.9300 . ? 
C21 C22 1.393(12) . ? 
C21 H21A 0.9300 . ? 
C22 C24 1.509(11) . ? 
C23 O10 1.220(11) . ? 
C23 O9 1.249(11) . ? 
C24 O12 1.237(10) . ? 
C24 O11 1.254(10) . ? 
C25 C26 1.386(11) . ? 
C25 C30 1.394(11) . ? 
C25 H25A 0.9300 . ? 
C26 C27 1.375(12) . ? 
C26 H26A 0.9300 . ? 
C27 C28 1.404(12) . ? 
C27 C31 1.510(12) . ? 
C28 C29 1.387(12) . ? 
C28 H28A 0.9300 . ? 
C29 C30 1.372(12) . ? 
C29 H29A 0.9300 . ? 
C30 C32 1.508(11) . ? 
C31 O15 1.250(11) . ? 
C31 O16 1.258(10) . ? 
C32 O46 1.250(11) . ? 
C32 O14 1.265(10) . ? 
C33 C34 1.373(12) . ? 
C33 C38 1.402(12) . ? 
C33 H33A 0.9300 . ? 
C34 C35 1.410(11) . ? 
C34 H34A 0.9300 . ? 
C35 C36 1.389(12) . ? 
C35 C39 1.511(11) . ? 
C36 C37 1.367(12) . ? 
C36 H36A 0.9300 . ? 
C37 C38 1.395(12) . ? 
C37 H37A 0.9300 . ? 
C38 C40 1.510(12) . ? 
C39 O20 1.233(10) . ? 
C39 O19 1.264(10) . ? 
C40 O17 1.234(11) . ? 
C40 O18 1.279(11) . ? 
C41 C46 1.375(12) . ? 
C41 C42 1.378(12) . ? 
C41 H41A 0.9300 . ? 
C42 C43 1.376(13) . ? 
C42 H42A 0.9300 . ? 
C43 C44 1.356(12) . ? 
C43 C48 1.533(12) . ? 
C44 C45 1.370(12) . ? 
C44 H44A 0.9300 . ? 
C45 C46 1.364(13) . ? 
C45 H45A 0.9300 . ? 
C46 C47 1.497(12) . ? 
C47 O22 1.256(11) . ? 
C47 O21 1.274(11) . ? 
C48 O24 1.257(11) . ? 
C48 O23 1.269(10) . ? 
C49 C52 1.375(12) . ? 
C49 C50 1.395(12) . ? 
C49 H49A 0.9300 . ? 
C50 C51 1.379(12) . ? 
C50 C53 1.500(11) . ? 
C51 C55 1.378(12) . ? 
C51 H51A 0.9300 . ? 
C52 C56 1.388(12) . ? 
C52 H52A 0.9300 . ? 
C53 O25 1.250(10) . ? 
C53 O26 1.264(10) . ? 
C53 Nd2 3.028(9) 2_665 ? 
C54 O28 1.231(10) . ? 
C54 O27 1.246(10) . ? 
C54 C56 1.528(11) . ? 
C55 C56 1.393(12) . ? 
C55 H55A 0.9300 . ? 
C57 O29 1.244(10) . ? 
C57 O30 1.269(10) . ? 
C57 C58 1.511(11) . ? 
C58 C63 1.372(12) . ? 
C58 C59 1.385(12) . ? 
C59 C60 1.389(12) . ? 
C59 H59A 0.9300 . ? 
C60 C61 1.378(12) . ? 
C60 H60A 0.9300 . ? 
C61 C62 1.391(12) . ? 
C61 C64 1.523(12) . ? 
C62 C63 1.388(12) . ? 
C62 H62A 0.9300 . ? 
C63 H63A 0.9300 . ? 
C64 O31 1.236(11) . ? 
C64 O32 1.264(10) . ? 
C65 C66 1.370(12) 2_766 ? 
C65 C67 1.373(12) . ? 
C65 H65A 0.9300 . ? 
C66 C65 1.370(12) 2_766 ? 
C66 C67 1.384(13) . ? 
C66 H66A 0.9300 . ? 
C67 C68 1.501(12) . ? 
C68 O34 1.241(10) . ? 
C68 O33 1.266(11) . ? 
C69 N1 1.467(15) . ? 
C69 H69A 0.9600 . ? 
C69 H69B 0.9600 . ? 
C69 H69C 0.9600 . ? 
C70 N1 1.440(15) . ? 
C70 H70A 0.9600 . ? 
C70 H70B 0.9600 . ? 
C70 H70C 0.9600 . ? 
C71 O35 1.237(13) . ? 
C71 N1 1.316(14) . ? 
C72 N2 1.465(13) . ? 
C72 H72A 0.9600 . ? 
C72 H72B 0.9600 . ? 
C72 H72C 0.9600 . ? 
C73 N2 1.415(13) . ? 
C73 H73A 0.9600 . ? 
C73 H73B 0.9600 . ? 
C73 H73C 0.9600 . ? 
C74 O36 1.236(13) . ? 
C74 N2 1.310(13) . ? 
C75 N3 1.401(15) . ? 
C75 H75A 0.9600 . ? 
C75 H75B 0.9600 . ? 
C75 H75C 0.9600 . ? 
C76 N3 1.484(15) . ? 
C76 H76A 0.9600 . ? 
C76 H76B 0.9600 . ? 
C76 H76C 0.9600 . ? 
C77 O37 1.244(14) . ? 
C77 N3 1.329(14) . ? 
C78 C79 1.364(11) 2_765 ? 
C78 C90 1.384(12) . ? 
C78 H78A 0.9300 . ? 
C79 C78 1.364(11) 2_765 ? 
C79 C90 1.380(12) . ? 
C79 H79A 0.9300 . ? 
C80 O38 1.253(10) . ? 
C80 O43 1.255(10) . ? 
C80 C90 1.526(11) . ? 
C81 N5 1.390(15) . ? 
C81 H81A 0.9600 . ? 
C81 H81B 0.9600 . ? 
C81 H81C 0.9600 . ? 
C82 N5 1.478(15) . ? 
C82 H82A 0.9600 . ? 
C82 H82B 0.9600 . ? 
C82 H82C 0.9600 . ? 
C83 O39 1.280(14) . ? 
C83 N5 1.294(14) . ? 
C83 H83A 0.9300 . ? 
C84 N6 1.422(13) . ? 
C84 H84A 0.9600 . ? 
C84 H84B 0.9600 . ? 
C84 H84C 0.9600 . ? 
C85 N6 1.464(13) . ? 
C85 H85A 0.9600 . ? 
C85 H85B 0.9600 . ? 
C85 H85C 0.9600 . ? 
C86 O40 1.229(12) . ? 
C86 N6 1.343(12) . ? 
C86 H86A 0.9300 . ? 
C87 N7 1.434(13) . ? 
C87 H87A 0.9600 . ? 
C87 H87B 0.9600 . ? 
C87 H87C 0.9600 . ? 
C88 N7 1.479(13) . ? 
C88 H88A 0.9600 . ? 
C88 H88B 0.9600 . ? 
C88 H88C 0.9600 . ? 
C89 O41 1.241(12) . ? 
C89 N7 1.307(12) . ? 
C89 H89A 0.9300 . ? 
C91 N4 1.419(14) . ? 
C91 H91A 0.9600 . ? 
C91 H91B 0.9600 . ? 
C91 H91C 0.9600 . ? 
C92 N4 1.440(14) . ? 
C92 H92A 0.9600 . ? 
C92 H92B 0.9600 . ? 
C92 H92C 0.9600 . ? 
C93 O44 1.222(13) . ? 
C93 N4 1.326(14) . ? 
C93 H93A 0.9300 . ? 
C94 N8 1.475(16) . ? 
C94 H94A 0.9600 . ? 
C94 H94B 0.9600 . ? 
C94 H94C 0.9600 . ? 
C95 N8 1.427(16) . ? 
C95 H95A 0.9600 . ? 
C95 H95B 0.9600 . ? 
C95 H95C 0.9600 . ? 
C96 O45 1.238(15) . ? 
C96 N8 1.278(16) . ? 
C96 H96A 0.9300 . ? 
C97 N9 1.430(13) . ? 
C97 H97A 0.9600 . ? 
C97 H97B 0.9600 . ? 
C97 H97C 0.9600 . ? 
C98 N9 1.446(13) . ? 
C98 H98A 0.9600 . ? 
C98 H98B 0.9600 . ? 
C98 H98C 0.9600 . ? 
C99 O47 1.190(12) . ? 
C99 N9 1.333(13) . ? 
C99 H99A 0.9300 . ? 
O1 Nd4 2.412(7) 2_575 ? 
O2 Nd2 2.446(6) 2_575 ? 
O3 Nd4 2.426(6) 2_675 ? 
O5 Nd1 2.482(6) 1_645 ? 
O6 Nd6 2.454(7) 1_645 ? 
O7 Nd6 2.452(7) 1_545 ? 
O9 Nd6 2.490(7) 1_645 ? 
O10 Nd5 2.456(6) 1_655 ? 
O14 Nd6 2.511(6) 2_675 ? 
O15 Nd4 2.459(7) 2_675 ? 
O17 Nd6 2.488(7) 2_776 ? 
O18 Nd5 2.429(7) 2_766 ? 
O21 Nd3 2.522(6) 1_655 ? 
O22 Nd1 2.470(6) 1_655 ? 
O25 Nd2 2.532(6) 2_665 ? 
O26 Nd2 2.794(6) 2_665 ? 
O43 Nd2 2.520(6) 2_665 ? 
O46 Nd5 2.444(7) 2_665 ? 
O1W H1WA 0.8499 . ? 
O1W H1WB 0.8502 . ? 
O2W H2WA 0.8500 . ? 
O2W H2WB 0.8500 . ? 
O3W H3WA 0.8814 . ? 
O3W H3WB 0.8771 . ? 
 
loop_ 
 _geom_angle_atom_site_label_1 
 _geom_angle_atom_site_label_2 
 _geom_angle_atom_site_label_3 
 _geom_angle 
 _geom_angle_site_symmetry_1 
 _geom_angle_site_symmetry_3 
 _geom_angle_publ_flag 
O34 Nd1 O20 97.9(2) . . ? 
O34 Nd1 O22 78.5(2) . 1_455 ? 
O20 Nd1 O22 144.3(2) . 1_455 ? 
O34 Nd1 O23 74.5(2) . . ? 
O20 Nd1 O23 74.9(2) . . ? 
O22 Nd1 O23 135.4(2) 1_455 . ? 
O34 Nd1 O5 150.3(2) . 1_465 ? 
O20 Nd1 O5 89.9(2) . 1_465 ? 
O22 Nd1 O5 78.5(2) 1_455 1_465 ? 
O23 Nd1 O5 135.2(2) . 1_465 ? 
O34 Nd1 O31 124.1(2) . . ? 
O20 Nd1 O31 122.0(2) . . ? 
O22 Nd1 O31 87.0(2) 1_455 . ? 
O23 Nd1 O31 79.9(2) . . ? 
O5 Nd1 O31 73.0(2) 1_465 . ? 
O34 Nd1 O35 74.7(2) . . ? 
O20 Nd1 O35 72.2(2) . . ? 
O22 Nd1 O35 72.6(2) 1_455 . ? 
O23 Nd1 O35 130.6(2) . . ? 
O5 Nd1 O35 80.6(2) 1_465 . ? 
O31 Nd1 O35 149.4(2) . . ? 
O34 Nd1 O32 76.44(18) . . ? 
O20 Nd1 O32 148.4(2) . . ? 
O22 Nd1 O32 65.96(19) 1_455 . ? 
O23 Nd1 O32 73.62(19) . . ? 
O5 Nd1 O32 110.59(19) 1_465 . ? 
O31 Nd1 O32 48.75(19) . . ? 
O35 Nd1 O32 133.1(2) . . ? 
O34 Nd1 C64 101.0(2) . . ? 
O20 Nd1 C64 140.1(2) . . ? 
O22 Nd1 C64 74.4(2) 1_455 . ? 
O23 Nd1 C64 76.8(2) . . ? 
O5 Nd1 C64 90.7(2) 1_465 . ? 
O31 Nd1 C64 24.0(2) . . ? 
O35 Nd1 C64 146.9(2) . . ? 
O32 Nd1 C64 24.9(2) . . ? 
O2 Nd2 O29 90.2(2) 2_575 . ? 
O2 Nd2 O38 143.0(2) 2_575 . ? 
O29 Nd2 O38 77.6(2) . . ? 
O2 Nd2 O26 145.93(19) 2_575 . ? 
O29 Nd2 O26 98.79(19) . . ? 
O38 Nd2 O26 71.00(19) . . ? 
O2 Nd2 O43 77.8(2) 2_575 2_665 ? 
O29 Nd2 O43 142.9(2) . 2_665 ? 
O38 Nd2 O43 131.0(2) . 2_665 ? 
O26 Nd2 O43 75.29(19) . 2_665 ? 
O2 Nd2 O25 74.7(2) 2_575 2_665 ? 
O29 Nd2 O25 129.8(2) . 2_665 ? 
O38 Nd2 O25 86.6(2) . 2_665 ? 
O26 Nd2 O25 120.55(19) . 2_665 ? 
O43 Nd2 O25 81.0(2) 2_665 2_665 ? 
O2 Nd2 O40 77.4(2) 2_575 . ? 
O29 Nd2 O40 71.2(2) . . ? 
O38 Nd2 O40 128.6(2) . . ? 
O26 Nd2 O40 74.63(19) . . ? 
O43 Nd2 O40 71.9(2) 2_665 . ? 
O25 Nd2 O40 144.44(19) 2_665 . ? 
O2 Nd2 O26 113.91(18) 2_575 2_665 ? 
O29 Nd2 O26 149.58(18) . 2_665 ? 
O38 Nd2 O26 71.97(18) . 2_665 ? 
O26 Nd2 O26 72.06(19) . 2_665 ? 
O43 Nd2 O26 64.36(18) 2_665 2_665 ? 
O25 Nd2 O26 48.56(18) 2_665 2_665 ? 
O40 Nd2 O26 130.06(19) . 2_665 ? 
O2 Nd2 C53 93.7(2) 2_575 2_665 ? 
O29 Nd2 C53 145.9(2) . 2_665 ? 
O38 Nd2 C53 79.1(2) . 2_665 ? 
O26 Nd2 C53 96.7(2) . 2_665 ? 
O43 Nd2 C53 70.6(2) 2_665 2_665 ? 
O25 Nd2 C53 23.9(2) 2_665 2_665 ? 
O40 Nd2 C53 142.6(2) . 2_665 ? 
O26 Nd2 C53 24.66(19) 2_665 2_665 ? 
O11 Nd3 O28 90.1(2) . . ? 
O11 Nd3 O24 80.6(2) . . ? 
O28 Nd3 O24 141.7(2) . . ? 
O11 Nd3 O32 145.6(2) . . ? 
O28 Nd3 O32 95.3(2) . . ? 
O24 Nd3 O32 74.2(2) . . ? 
O11 Nd3 O21 144.4(2) . 1_455 ? 
O28 Nd3 O21 76.3(2) . 1_455 ? 
O24 Nd3 O21 129.4(2) . 1_455 ? 
O32 Nd3 O21 69.4(2) . 1_455 ? 
O11 Nd3 O33 76.1(2) . . ? 
O28 Nd3 O33 135.6(2) . . ? 
O24 Nd3 O33 78.1(2) . . ? 
O32 Nd3 O33 119.9(2) . . ? 
O21 Nd3 O33 90.7(2) 1_455 . ? 
O11 Nd3 O2W 80.00(19) . . ? 
O28 Nd3 O2W 71.00(19) . . ? 
O24 Nd3 O2W 141.56(19) . . ? 
O32 Nd3 O2W 133.74(18) . . ? 
O21 Nd3 O2W 64.5(2) 1_455 . ? 
O33 Nd3 O2W 65.2(2) . . ? 
O11 Nd3 O41 75.6(2) . . ? 
O28 Nd3 O41 70.3(2) . . ? 
O24 Nd3 O41 71.4(2) . . ? 
O32 Nd3 O41 74.41(19) . . ? 
O21 Nd3 O41 127.4(2) 1_455 . ? 
O33 Nd3 O41 141.1(2) . . ? 
O2W Nd3 O41 133.7(2) . . ? 
O11 Nd3 O34 115.90(18) . . ? 
O28 Nd3 O34 149.25(19) . . ? 
O24 Nd3 O34 63.49(19) . . ? 
O32 Nd3 O34 72.89(18) . . ? 
O21 Nd3 O34 72.92(19) 1_455 . ? 
O33 Nd3 O34 46.98(19) . . ? 
O2W Nd3 O34 96.39(17) . . ? 
O41 Nd3 O34 129.65(19) . . ? 
O1 Nd4 O3 139.1(2) 2_575 2_675 ? 
O1 Nd4 O15 147.2(2) 2_575 2_675 ? 
O3 Nd4 O15 73.7(2) 2_675 2_675 ? 
O1 Nd4 O16 79.0(2) 2_575 . ? 
O3 Nd4 O16 75.8(2) 2_675 . ? 
O15 Nd4 O16 121.0(2) 2_675 . ? 
O1 Nd4 O4 82.9(2) 2_575 . ? 
O3 Nd4 O4 119.7(2) 2_675 . ? 
O15 Nd4 O4 78.9(2) 2_675 . ? 
O16 Nd4 O4 74.3(2) . . ? 
O1 Nd4 O30 96.0(2) 2_575 . ? 
O3 Nd4 O30 80.3(2) 2_675 . ? 
O15 Nd4 O30 86.5(2) 2_675 . ? 
O16 Nd4 O30 135.3(2) . . ? 
O4 Nd4 O30 149.8(2) . . ? 
O1 Nd4 O39 73.2(2) 2_575 . ? 
O3 Nd4 O39 140.3(2) 2_675 . ? 
O15 Nd4 O39 76.6(2) 2_675 . ? 
O16 Nd4 O39 143.3(2) . . ? 
O4 Nd4 O39 78.8(2) . . ? 
O30 Nd4 O39 72.1(2) . . ? 
O1 Nd4 O3W 67.1(2) 2_575 . ? 
O3 Nd4 O3W 75.2(2) 2_675 . ? 
O15 Nd4 O3W 139.7(2) 2_675 . ? 
O16 Nd4 O3W 74.2(2) . . ? 
O4 Nd4 O3W 139.8(2) . . ? 
O30 Nd4 O3W 63.35(19) . . ? 
O39 Nd4 O3W 114.7(2) . . ? 
O12 Nd5 O18 80.2(2) . 2_766 ? 
O12 Nd5 O46 148.2(2) . 2_665 ? 
O18 Nd5 O46 123.1(2) 2_766 2_665 ? 
O12 Nd5 O10 134.7(2) . 1_455 ? 
O18 Nd5 O10 77.1(2) 2_766 1_455 ? 
O46 Nd5 O10 75.6(2) 2_665 1_455 ? 
O12 Nd5 O27 89.5(2) . . ? 
O18 Nd5 O27 126.8(2) 2_766 . ? 
O46 Nd5 O27 91.4(2) 2_665 . ? 
O10 Nd5 O27 74.1(2) 1_455 . ? 
O12 Nd5 O8 80.2(2) . . ? 
O18 Nd5 O8 76.4(2) 2_766 . ? 
O46 Nd5 O8 84.7(2) 2_665 . ? 
O10 Nd5 O8 130.1(2) 1_455 . ? 
O27 Nd5 O8 152.8(2) . . ? 
O12 Nd5 O37 74.1(2) . . ? 
O18 Nd5 O37 146.2(2) 2_766 . ? 
O46 Nd5 O37 75.4(2) 2_665 . ? 
O10 Nd5 O37 136.7(2) 1_455 . ? 
O27 Nd5 O37 75.1(2) . . ? 
O8 Nd5 O37 77.9(2) . . ? 
O7 Nd6 O1W 73.8(2) 1_565 . ? 
O7 Nd6 O6 144.6(2) 1_565 1_465 ? 
O1W Nd6 O6 73.5(2) . 1_465 ? 
O7 Nd6 O19 91.2(2) 1_565 . ? 
O1W Nd6 O19 66.5(2) . . ? 
O6 Nd6 O19 88.0(2) 1_465 . ? 
O7 Nd6 O17 70.3(2) 1_565 2_776 ? 
O1W Nd6 O17 134.7(2) . 2_776 ? 
O6 Nd6 O17 144.9(2) 1_465 2_776 ? 
O19 Nd6 O17 87.4(2) . 2_776 ? 
O7 Nd6 O9 110.3(2) 1_565 1_465 ? 
O1W Nd6 O9 141.7(2) . 1_465 ? 
O6 Nd6 O9 87.7(2) 1_465 1_465 ? 
O19 Nd6 O9 147.5(2) . 1_465 ? 
O17 Nd6 O9 77.9(2) 2_776 1_465 ? 
O7 Nd6 O14 76.5(2) 1_565 2_675 ? 
O1W Nd6 O14 71.9(2) . 2_675 ? 
O6 Nd6 O14 80.8(2) 1_465 2_675 ? 
O19 Nd6 O14 138.3(2) . 2_675 ? 
O17 Nd6 O14 123.4(2) 2_776 2_675 ? 
O9 Nd6 O14 72.4(2) 1_465 2_675 ? 
O7 Nd6 O36 138.4(2) 1_565 . ? 
O1W Nd6 O36 127.8(2) . . ? 
O6 Nd6 O36 74.5(2) 1_465 . ? 
O19 Nd6 O36 72.4(2) . . ? 
O17 Nd6 O36 71.0(2) 2_776 . ? 
O9 Nd6 O36 75.4(2) 1_465 . ? 
O14 Nd6 O36 139.8(2) 2_675 . ? 
C2 C1 C6 119.9(8) . . ? 
C2 C1 C7 120.2(8) . . ? 
C6 C1 C7 119.8(8) . . ? 
C1 C2 C3 121.3(8) . . ? 
C1 C2 H2A 119.3 . . ? 
C3 C2 H2A 119.3 . . ? 
C2 C3 C4 118.7(8) . . ? 
C2 C3 H3A 120.6 . . ? 
C4 C3 H3A 120.6 . . ? 
C5 C4 C3 119.4(8) . . ? 
C5 C4 C8 121.8(8) . . ? 
C3 C4 C8 118.8(8) . . ? 
C6 C5 C4 121.4(9) . . ? 
C6 C5 H5A 119.3 . . ? 
C4 C5 H5A 119.3 . . ? 
C5 C6 C1 119.2(9) . . ? 
C5 C6 H6A 120.4 . . ? 
C1 C6 H6A 120.4 . . ? 
O2 C7 O1 124.0(8) . . ? 
O2 C7 C1 119.4(8) . . ? 
O1 C7 C1 116.5(8) . . ? 
O3 C8 O4 125.9(9) . . ? 
O3 C8 C4 118.4(8) . . ? 
O4 C8 C4 115.7(8) . . ? 
C14 C9 C10 118.7(8) . . ? 
C14 C9 C15 121.2(8) . . ? 
C10 C9 C15 120.0(8) . . ? 
C11 C10 C9 120.0(9) . . ? 
C11 C10 H10A 120.0 . . ? 
C9 C10 H10A 120.0 . . ? 
C10 C11 C12 121.1(9) . . ? 
C10 C11 H11A 119.4 . . ? 
C12 C11 H11A 119.4 . . ? 
C11 C12 C13 119.6(8) . . ? 
C11 C12 C16 120.3(8) . . ? 
C13 C12 C16 120.0(8) . . ? 
C14 C13 C12 118.8(9) . . ? 
C14 C13 H13A 120.6 . . ? 
C12 C13 H13A 120.6 . . ? 
C13 C14 C9 121.6(9) . . ? 
C13 C14 H14A 119.2 . . ? 
C9 C14 H14A 119.2 . . ? 
O6 C15 O5 123.5(8) . . ? 
O6 C15 C9 118.5(8) . . ? 
O5 C15 C9 118.0(8) . . ? 
O8 C16 O7 123.8(9) . . ? 
O8 C16 C12 118.0(8) . . ? 
O7 C16 C12 118.2(8) . . ? 
C18 C17 C22 121.8(9) . . ? 
C18 C17 H17A 119.1 . . ? 
C22 C17 H17A 119.1 . . ? 
C17 C18 C19 119.2(9) . . ? 
C17 C18 H18A 120.4 . . ? 
C19 C18 H18A 120.4 . . ? 
C20 C19 C18 119.3(8) . . ? 
C20 C19 C23 121.5(8) . . ? 
C18 C19 C23 119.2(8) . . ? 
C19 C20 C21 121.0(9) . . ? 
C19 C20 H20A 119.5 . . ? 
C21 C20 H20A 119.5 . . ? 
C20 C21 C22 120.0(9) . . ? 
C20 C21 H21A 120.0 . . ? 
C22 C21 H21A 120.0 . . ? 
C17 C22 C21 118.7(8) . . ? 
C17 C22 C24 122.7(8) . . ? 
C21 C22 C24 118.5(8) . . ? 
O10 C23 O9 126.7(9) . . ? 
O10 C23 C19 119.3(9) . . ? 
O9 C23 C19 114.0(9) . . ? 
O12 C24 O11 123.9(8) . . ? 
O12 C24 C22 119.1(8) . . ? 
O11 C24 C22 116.8(8) . . ? 
C26 C25 C30 119.9(9) . . ? 
C26 C25 H25A 120.0 . . ? 
C30 C25 H25A 120.0 . . ? 
C27 C26 C25 121.6(9) . . ? 
C27 C26 H26A 119.2 . . ? 
C25 C26 H26A 119.2 . . ? 
C26 C27 C28 118.0(8) . . ? 
C26 C27 C31 121.8(8) . . ? 
C28 C27 C31 120.1(8) . . ? 
C29 C28 C27 120.5(9) . . ? 
C29 C28 H28A 119.8 . . ? 
C27 C28 H28A 119.8 . . ? 
C30 C29 C28 120.9(8) . . ? 
C30 C29 H29A 119.6 . . ? 
C28 C29 H29A 119.6 . . ? 
C29 C30 C25 119.1(8) . . ? 
C29 C30 C32 121.2(8) . . ? 
C25 C30 C32 119.7(8) . . ? 
O15 C31 O16 125.8(9) . . ? 
O15 C31 C27 117.7(8) . . ? 
O16 C31 C27 116.4(8) . . ? 
O46 C32 O14 125.9(8) . . ? 
O46 C32 C30 118.4(8) . . ? 
O14 C32 C30 115.7(8) . . ? 
C34 C33 C38 120.7(9) . . ? 
C34 C33 H33A 119.6 . . ? 
C38 C33 H33A 119.6 . . ? 
C33 C34 C35 119.8(9) . . ? 
C33 C34 H34A 120.1 . . ? 
C35 C34 H34A 120.1 . . ? 
C36 C35 C34 119.1(8) . . ? 
C36 C35 C39 120.2(8) . . ? 
C34 C35 C39 120.6(8) . . ? 
C37 C36 C35 121.0(9) . . ? 
C37 C36 H36A 119.5 . . ? 
C35 C36 H36A 119.5 . . ? 
C36 C37 C38 120.5(9) . . ? 
C36 C37 H37A 119.7 . . ? 
C38 C37 H37A 119.7 . . ? 
C37 C38 C33 118.9(8) . . ? 
C37 C38 C40 118.7(8) . . ? 
C33 C38 C40 122.4(8) . . ? 
O20 C39 O19 125.6(8) . . ? 
O20 C39 C35 118.6(8) . . ? 
O19 C39 C35 115.8(8) . . ? 
O17 C40 O18 126.5(9) . . ? 
O17 C40 C38 117.8(8) . . ? 
O18 C40 C38 115.7(9) . . ? 
C46 C41 C42 120.5(10) . . ? 
C46 C41 H41A 119.8 . . ? 
C42 C41 H41A 119.8 . . ? 
C43 C42 C41 120.0(9) . . ? 
C43 C42 H42A 120.0 . . ? 
C41 C42 H42A 120.0 . . ? 
C44 C43 C42 119.2(8) . . ? 
C44 C43 C48 120.1(8) . . ? 
C42 C43 C48 120.7(8) . . ? 
C43 C44 C45 120.8(9) . . ? 
C43 C44 H44A 119.6 . . ? 
C45 C44 H44A 119.6 . . ? 
C46 C45 C44 120.8(10) . . ? 
C46 C45 H45A 119.6 . . ? 
C44 C45 H45A 119.6 . . ? 
C45 C46 C41 118.7(8) . . ? 
C45 C46 C47 120.9(9) . . ? 
C41 C46 C47 120.4(9) . . ? 
O22 C47 O21 124.0(8) . . ? 
O22 C47 C46 117.0(8) . . ? 
O21 C47 C46 119.0(8) . . ? 
O24 C48 O23 125.7(8) . . ? 
O24 C48 C43 115.2(8) . . ? 
O23 C48 C43 119.0(8) . . ? 
C52 C49 C50 120.6(9) . . ? 
C52 C49 H49A 119.7 . . ? 
C50 C49 H49A 119.7 . . ? 
C51 C50 C49 119.7(8) . . ? 
C51 C50 C53 121.1(8) . . ? 
C49 C50 C53 119.2(8) . . ? 
C55 C51 C50 120.2(9) . . ? 
C55 C51 H51A 119.9 . . ? 
C50 C51 H51A 119.9 . . ? 
C49 C52 C56 119.5(9) . . ? 
C49 C52 H52A 120.2 . . ? 
C56 C52 H52A 120.2 . . ? 
O25 C53 O26 122.3(8) . . ? 
O25 C53 C50 118.6(8) . . ? 
O26 C53 C50 119.0(8) . . ? 
O25 C53 Nd2 55.2(4) . 2_665 ? 
O26 C53 Nd2 67.2(4) . 2_665 ? 
C50 C53 Nd2 172.2(6) . 2_665 ? 
O28 C54 O27 125.5(8) . . ? 
O28 C54 C56 117.3(8) . . ? 
O27 C54 C56 117.1(8) . . ? 
C51 C55 C56 120.0(9) . . ? 
C51 C55 H55A 120.0 . . ? 
C56 C55 H55A 120.0 . . ? 
C52 C56 C55 120.1(8) . . ? 
C52 C56 C54 120.6(8) . . ? 
C55 C56 C54 119.2(8) . . ? 
O29 C57 O30 125.3(8) . . ? 
O29 C57 C58 118.4(7) . . ? 
O30 C57 C58 116.3(7) . . ? 
C63 C58 C59 119.0(8) . . ? 
C63 C58 C57 121.4(8) . . ? 
C59 C58 C57 119.6(8) . . ? 
C60 C59 C58 120.6(9) . . ? 
C60 C59 H59A 119.7 . . ? 
C58 C59 H59A 119.7 . . ? 
C61 C60 C59 120.0(9) . . ? 
C61 C60 H60A 120.0 . . ? 
C59 C60 H60A 120.0 . . ? 
C60 C61 C62 119.5(8) . . ? 
C60 C61 C64 120.4(8) . . ? 
C62 C61 C64 120.0(8) . . ? 
C61 C62 C63 119.7(9) . . ? 
C61 C62 H62A 120.2 . . ? 
C63 C62 H62A 120.2 . . ? 
C58 C63 C62 121.1(9) . . ? 
C58 C63 H63A 119.5 . . ? 
C62 C63 H63A 119.5 . . ? 
O31 C64 O32 122.3(8) . . ? 
O31 C64 C61 118.1(8) . . ? 
O32 C64 C61 119.6(8) . . ? 
O31 C64 Nd1 57.0(5) . . ? 
O32 C64 Nd1 65.6(5) . . ? 
C61 C64 Nd1 171.3(6) . . ? 
C66 C65 C67 121.4(10) 2_766 . ? 
C66 C65 H65A 119.3 2_766 . ? 
C67 C65 H65A 119.3 . . ? 
C65 C66 C67 120.0(9) 2_766 . ? 
C65 C66 H66A 120.0 2_766 . ? 
C67 C66 H66A 120.0 . . ? 
C65 C67 C66 118.6(8) . . ? 
C65 C67 C68 120.7(9) . . ? 
C66 C67 C68 120.7(8) . . ? 
O34 C68 O33 122.4(8) . . ? 
O34 C68 C67 120.7(8) . . ? 
O33 C68 C67 116.9(8) . . ? 
N1 C69 H69A 109.5 . . ? 
N1 C69 H69B 109.5 . . ? 
H69A C69 H69B 109.5 . . ? 
N1 C69 H69C 109.5 . . ? 
H69A C69 H69C 109.5 . . ? 
H69B C69 H69C 109.5 . . ? 
N1 C70 H70A 109.5 . . ? 
N1 C70 H70B 109.5 . . ? 
H70A C70 H70B 109.5 . . ? 
N1 C70 H70C 109.5 . . ? 
H70A C70 H70C 109.5 . . ? 
H70B C70 H70C 109.5 . . ? 
O35 C71 N1 123.4(12) . . ? 
N2 C72 H72A 109.5 . . ? 
N2 C72 H72B 109.5 . . ? 
H72A C72 H72B 109.5 . . ? 
N2 C72 H72C 109.5 . . ? 
H72A C72 H72C 109.5 . . ? 
H72B C72 H72C 109.5 . . ? 
N2 C73 H73A 109.5 . . ? 
N2 C73 H73B 109.5 . . ? 
H73A C73 H73B 109.5 . . ? 
N2 C73 H73C 109.5 . . ? 
H73A C73 H73C 109.5 . . ? 
H73B C73 H73C 109.5 . . ? 
O36 C74 N2 120.5(11) . . ? 
N3 C75 H75A 109.5 . . ? 
N3 C75 H75B 109.5 . . ? 
H75A C75 H75B 109.5 . . ? 
N3 C75 H75C 109.5 . . ? 
H75A C75 H75C 109.5 . . ? 
H75B C75 H75C 109.5 . . ? 
N3 C76 H76A 109.5 . . ? 
N3 C76 H76B 109.5 . . ? 
H76A C76 H76B 109.5 . . ? 
N3 C76 H76C 109.5 . . ? 
H76A C76 H76C 109.5 . . ? 
H76B C76 H76C 109.5 . . ? 
O37 C77 N3 121.8(12) . . ? 
C79 C78 C90 120.3(9) 2_765 . ? 
C79 C78 H78A 119.9 2_765 . ? 
C90 C78 H78A 119.9 . . ? 
C78 C79 C90 120.8(9) 2_765 . ? 
C78 C79 H79A 119.6 2_765 . ? 
C90 C79 H79A 119.6 . . ? 
O38 C80 O43 126.5(8) . . ? 
O38 C80 C90 117.2(8) . . ? 
O43 C80 C90 116.2(8) . . ? 
N5 C81 H81A 109.5 . . ? 
N5 C81 H81B 109.5 . . ? 
H81A C81 H81B 109.5 . . ? 
N5 C81 H81C 109.5 . . ? 
H81A C81 H81C 109.5 . . ? 
H81B C81 H81C 109.5 . . ? 
N5 C82 H82A 109.5 . . ? 
N5 C82 H82B 109.5 . . ? 
H82A C82 H82B 109.5 . . ? 
N5 C82 H82C 109.5 . . ? 
H82A C82 H82C 109.5 . . ? 
H82B C82 H82C 109.5 . . ? 
O39 C83 N5 121.6(13) . . ? 
O39 C83 H83A 119.2 . . ? 
N5 C83 H83A 119.2 . . ? 
N6 C84 H84A 109.5 . . ? 
N6 C84 H84B 109.5 . . ? 
H84A C84 H84B 109.5 . . ? 
N6 C84 H84C 109.5 . . ? 
H84A C84 H84C 109.5 . . ? 
H84B C84 H84C 109.5 . . ? 
N6 C85 H85A 109.5 . . ? 
N6 C85 H85B 109.5 . . ? 
H85A C85 H85B 109.5 . . ? 
N6 C85 H85C 109.5 . . ? 
H85A C85 H85C 109.5 . . ? 
H85B C85 H85C 109.5 . . ? 
O40 C86 N6 125.0(11) . . ? 
O40 C86 H86A 117.5 . . ? 
N6 C86 H86A 117.5 . . ? 
N7 C87 H87A 109.5 . . ? 
N7 C87 H87B 109.5 . . ? 
H87A C87 H87B 109.5 . . ? 
N7 C87 H87C 109.5 . . ? 
H87A C87 H87C 109.5 . . ? 
H87B C87 H87C 109.5 . . ? 
N7 C88 H88A 109.5 . . ? 
N7 C88 H88B 109.5 . . ? 
H88A C88 H88B 109.5 . . ? 
N7 C88 H88C 109.5 . . ? 
H88A C88 H88C 109.5 . . ? 
H88B C88 H88C 109.5 . . ? 
O41 C89 N7 125.0(11) . . ? 
O41 C89 H89A 117.5 . . ? 
N7 C89 H89A 117.5 . . ? 
C79 C90 C78 118.9(8) . . ? 
C79 C90 C80 121.4(8) . . ? 
C78 C90 C80 119.7(8) . . ? 
N4 C91 H91A 109.5 . . ? 
N4 C91 H91B 109.5 . . ? 
H91A C91 H91B 109.5 . . ? 
N4 C91 H91C 109.5 . . ? 
H91A C91 H91C 109.5 . . ? 
H91B C91 H91C 109.5 . . ? 
N4 C92 H92A 109.5 . . ? 
N4 C92 H92B 109.5 . . ? 
H92A C92 H92B 109.5 . . ? 
N4 C92 H92C 109.5 . . ? 
H92A C92 H92C 109.5 . . ? 
H92B C92 H92C 109.5 . . ? 
O44 C93 N4 122.7(13) . . ? 
O44 C93 H93A 118.6 . . ? 
N4 C93 H93A 118.7 . . ? 
N8 C94 H94A 109.5 . . ? 
N8 C94 H94B 109.5 . . ? 
H94A C94 H94B 109.5 . . ? 
N8 C94 H94C 109.5 . . ? 
H94A C94 H94C 109.5 . . ? 
H94B C94 H94C 109.5 . . ? 
N8 C95 H95A 109.5 . . ? 
N8 C95 H95B 109.5 . . ? 
H95A C95 H95B 109.5 . . ? 
N8 C95 H95C 109.5 . . ? 
H95A C95 H95C 109.5 . . ? 
H95B C95 H95C 109.5 . . ? 
O45 C96 N8 124.7(15) . . ? 
O45 C96 H96A 117.6 . . ? 
N8 C96 H96A 117.6 . . ? 
N9 C97 H97A 109.5 . . ? 
N9 C97 H97B 109.5 . . ? 
H97A C97 H97B 109.5 . . ? 
N9 C97 H97C 109.5 . . ? 
H97A C97 H97C 109.5 . . ? 
H97B C97 H97C 109.5 . . ? 
N9 C98 H98A 109.5 . . ? 
N9 C98 H98B 109.5 . . ? 
H98A C98 H98B 109.5 . . ? 
N9 C98 H98C 109.5 . . ? 
H98A C98 H98C 109.5 . . ? 
H98B C98 H98C 109.5 . . ? 
O47 C99 N9 127.4(11) . . ? 
O47 C99 H99A 116.3 . . ? 
N9 C99 H99A 116.3 . . ? 
C71 N1 C70 122.5(11) . . ? 
C71 N1 C69 119.6(11) . . ? 
C70 N1 C69 117.8(10) . . ? 
C74 N2 C73 129.8(10) . . ? 
C74 N2 C72 115.5(10) . . ? 
C73 N2 C72 114.6(9) . . ? 
C77 N3 C75 124.2(11) . . ? 
C77 N3 C76 117.6(11) . . ? 
C75 N3 C76 118.2(11) . . ? 
C93 N4 C91 122.2(11) . . ? 
C93 N4 C92 121.1(11) . . ? 
C91 N4 C92 116.6(10) . . ? 
C83 N5 C81 124.4(12) . . ? 
C83 N5 C82 117.8(12) . . ? 
C81 N5 C82 117.7(11) . . ? 
C86 N6 C84 120.7(10) . . ? 
C86 N6 C85 120.2(10) . . ? 
C84 N6 C85 119.1(9) . . ? 
C89 N7 C87 121.7(10) . . ? 
C89 N7 C88 121.0(10) . . ? 
C87 N7 C88 117.2(9) . . ? 
C96 N8 C95 123.2(13) . . ? 
C96 N8 C94 122.9(13) . . ? 
C95 N8 C94 113.8(11) . . ? 
C99 N9 C97 120.1(10) . . ? 
C99 N9 C98 124.7(10) . . ? 
C97 N9 C98 114.9(9) . . ? 
C7 O1 Nd4 162.7(6) . 2_575 ? 
C7 O2 Nd2 130.2(6) . 2_575 ? 
C8 O3 Nd4 141.3(6) . 2_675 ? 
C8 O4 Nd4 133.4(6) . . ? 
C15 O5 Nd1 120.0(6) . 1_645 ? 
C15 O6 Nd6 171.7(7) . 1_645 ? 
C16 O7 Nd6 159.8(6) . 1_545 ? 
C16 O8 Nd5 116.4(6) . . ? 
C23 O9 Nd6 136.1(6) . 1_645 ? 
C23 O10 Nd5 137.2(6) . 1_655 ? 
C24 O11 Nd3 134.6(6) . . ? 
C24 O12 Nd5 161.2(6) . . ? 
C32 O14 Nd6 137.1(6) . 2_675 ? 
C31 O15 Nd4 156.7(6) . 2_675 ? 
C31 O16 Nd4 136.1(6) . . ? 
C40 O17 Nd6 149.5(6) . 2_776 ? 
C40 O18 Nd5 138.8(6) . 2_766 ? 
C39 O19 Nd6 138.4(6) . . ? 
C39 O20 Nd1 145.7(6) . . ? 
C47 O21 Nd3 133.2(6) . 1_655 ? 
C47 O22 Nd1 138.4(6) . 1_655 ? 
C48 O23 Nd1 128.2(6) . . ? 
C48 O24 Nd3 142.6(6) . . ? 
C53 O25 Nd2 100.9(5) . 2_665 ? 
C53 O26 Nd2 163.9(5) . . ? 
C53 O26 Nd2 88.1(5) . 2_665 ? 
Nd2 O26 Nd2 107.94(19) . 2_665 ? 
C54 O27 Nd5 140.2(6) . . ? 
C54 O28 Nd3 146.3(6) . . ? 
C57 O29 Nd2 151.9(5) . . ? 
C57 O30 Nd4 136.3(5) . . ? 
C64 O31 Nd1 99.0(6) . . ? 
C64 O32 Nd3 161.8(6) . . ? 
C64 O32 Nd1 89.6(5) . . ? 
Nd3 O32 Nd1 106.8(2) . . ? 
C68 O33 Nd3 102.4(6) . . ? 
C68 O34 Nd1 167.9(6) . . ? 
C68 O34 Nd3 88.2(5) . . ? 
Nd1 O34 Nd3 103.91(19) . . ? 
C71 O35 Nd1 123.1(8) . . ? 
C74 O36 Nd6 127.8(8) . . ? 
C77 O37 Nd5 128.8(8) . . ? 
C80 O38 Nd2 132.6(6) . . ? 
C83 O39 Nd4 126.8(8) . . ? 
C86 O40 Nd2 123.0(7) . . ? 
C89 O41 Nd3 125.5(7) . . ? 
C80 O43 Nd2 139.0(6) . 2_665 ? 
C32 O46 Nd5 153.3(6) . 2_665 ? 
Nd6 O1W H1WA 111.0 . . ? 
Nd6 O1W H1WB 111.2 . . ? 
H1WA O1W H1WB 109.4 . . ? 
Nd3 O2W H2WA 107.1 . . ? 
Nd3 O2W H2WB 107.3 . . ? 
H2WA O2W H2WB 107.0 . . ? 
Nd4 O3W H3WA 136.5 . . ? 
Nd4 O3W H3WB 100.9 . . ? 
H3WA O3W H3WB 102.6 . . ? 
 
_diffrn_measured_fraction_theta_max    0.975 
_diffrn_reflns_theta_full              26.00 
_diffrn_measured_fraction_theta_full   0.975 
_refine_diff_density_max    4.885 
_refine_diff_density_min   -2.180 
_refine_diff_density_rms    0.262 

#===END


data_4Y
_database_code_depnum_ccdc_archive 'CCDC 745288'
_audit_creation_method           SHELXL-97
_chemical_name_systematic        
;
?
;
_chemical_name_common             ? 
_chemical_melting_point           ? 
_chemical_formula_moiety          'C15 H15 N O8 Y' 
_chemical_formula_sum 
 'C15 H15 N O8 Y' 
_chemical_formula_weight          426.19 
 
loop_ 
 _atom_type_symbol 
 _atom_type_description 
 _atom_type_scat_dispersion_real 
 _atom_type_scat_dispersion_imag 
 _atom_type_scat_source 
 'C'  'C'   0.0033   0.0016 
 'International Tables Vol C Tables 4.2.6.8 and 6.1.1.4' 
 'H'  'H'   0.0000   0.0000 
 'International Tables Vol C Tables 4.2.6.8 and 6.1.1.4' 
 'O'  'O'   0.0106   0.0060 
 'International Tables Vol C Tables 4.2.6.8 and 6.1.1.4' 
 'Y'  'Y'  -2.7962   3.5667 
 'International Tables Vol C Tables 4.2.6.8 and 6.1.1.4' 
 'N'  'N'   0.0061   0.0033 
 'International Tables Vol C Tables 4.2.6.8 and 6.1.1.4' 
 
_symmetry_cell_setting            'triclinic' 
_symmetry_space_group_name_H-M    'p -1'
_symmetry_space_group_name_Hall   '-p 1' 
 
loop_ 
 _symmetry_equiv_pos_as_xyz 
 'x, y, z' 
 '-x, -y, -z' 
 
_cell_length_a                    8.613(2) 
_cell_length_b                    10.122(3) 
_cell_length_c                    11.095(3) 
_cell_angle_alpha                 65.205(4) 
_cell_angle_beta                  71.609(5) 
_cell_angle_gamma                 78.617(5) 
_cell_volume                      830.8(4) 
_cell_formula_units_Z             2 
_cell_measurement_temperature     298(2) 
_cell_measurement_reflns_used     812 
_cell_measurement_theta_min       2.13 
_cell_measurement_theta_max       26.00 
 
_exptl_crystal_description        block
_exptl_crystal_colour             colorless
_exptl_crystal_size_max           0.25 
_exptl_crystal_size_mid           0.23 
_exptl_crystal_size_min           0.20 
_exptl_crystal_density_meas       ? 
_exptl_crystal_density_diffrn     1.704 
_exptl_crystal_density_method     'not measured' 
_exptl_crystal_F_000              430 
_exptl_absorpt_coefficient_mu     3.554 
_exptl_absorpt_correction_type    'multi-scan' 
_exptl_absorpt_correction_T_min   0.4703 
_exptl_absorpt_correction_T_max   0.5367 
_exptl_absorpt_process_details    'SADABS(Sheldrick,2003)' 
 
_exptl_special_details 
; 
 ? 
; 
 
_diffrn_ambient_temperature       298(2) 
_diffrn_radiation_wavelength      0.71073 
_diffrn_radiation_type            MoK\a 
_diffrn_radiation_source          'fine-focus sealed tube' 
_diffrn_radiation_monochromator   graphite 
_diffrn_measurement_device_type  'Bruker Smart Apex CCD area detector'
_diffrn_measurement_method       'phi and omega scans' 
_diffrn_detector_area_resol_mean  ? 
_diffrn_standards_number          ? 
_diffrn_standards_interval_count  ? 
_diffrn_standards_interval_time   ? 
_diffrn_standards_decay_%         ? 
_diffrn_reflns_number             10054 
_diffrn_reflns_av_R_equivalents   0.0394 
_diffrn_reflns_av_sigmaI/netI     0.0449 
_diffrn_reflns_limit_h_min        -8 
_diffrn_reflns_limit_h_max        10 
_diffrn_reflns_limit_k_min        -12 
_diffrn_reflns_limit_k_max        12 
_diffrn_reflns_limit_l_min        -13 
_diffrn_reflns_limit_l_max        13 
_diffrn_reflns_theta_min          2.09 
_diffrn_reflns_theta_max          26.00 
_reflns_number_total              3224 
_reflns_number_gt                 2762 
_reflns_threshold_expression      >2sigma(I) 
 
_computing_data_collection        'SMART(Bruker, 2003)'
_computing_cell_refinement        'SAINTPLUS(Bruker, 2003)'
_computing_data_reduction         'SAINTPLUS'
_computing_structure_solution     'SHELXS-97 (Sheldrick, 2008)' 
_computing_structure_refinement   'SHELXL-97 (Sheldrick, 2008)' 
_computing_molecular_graphics     'SHELXTL(Bruker, 2008)' 
_computing_publication_material   'SHELXTL'
 
_refine_special_details 
; 
 Refinement of F^2^ against ALL reflections.  The weighted R-factor wR and 
 goodness of fit S are based on F^2^, conventional R-factors R are based 
 on F, with F set to zero for negative F^2^. The threshold expression of 
 F^2^ > 2sigma(F^2^) is used only for calculating R-factors(gt) etc. and is 
 not relevant to the choice of reflections for refinement.  R-factors based 
 on F^2^ are statistically about twice as large as those based on F, and R- 
 factors based on ALL data will be even larger. 
; 
 
_refine_ls_structure_factor_coef  Fsqd  
_refine_ls_matrix_type            full 
_refine_ls_weighting_scheme       calc  
_refine_ls_weighting_details 
 'calc w=1/[\s^2^(Fo^2^)+(0.0825P)^2^+0.0000P] where P=(Fo^2^+2Fc^2^)/3' 
_atom_sites_solution_primary      direct 
_atom_sites_solution_secondary    difmap 
_atom_sites_solution_hydrogens    geom 
_refine_ls_hydrogen_treatment     constr 
_refine_ls_extinction_method      none 
_refine_ls_extinction_coef        ? 
_refine_ls_number_reflns          3224 
_refine_ls_number_parameters      228 
_refine_ls_number_restraints      18 
_refine_ls_R_factor_all           0.0522 
_refine_ls_R_factor_gt            0.0409 
_refine_ls_wR_factor_ref          0.1132 
_refine_ls_wR_factor_gt           0.1090 
_refine_ls_goodness_of_fit_ref    1.010 
_refine_ls_restrained_S_all       1.033 
_refine_ls_shift/su_max           0.001 
_refine_ls_shift/su_mean          0.000 
 
loop_ 
 _atom_site_label 
 _atom_site_type_symbol 
 _atom_site_fract_x 
 _atom_site_fract_y 
 _atom_site_fract_z 
 _atom_site_U_iso_or_equiv 
 _atom_site_adp_type 
 _atom_site_occupancy 
 _atom_site_symmetry_multiplicity 
 _atom_site_calc_flag 
 _atom_site_refinement_flags 
 _atom_site_disorder_assembly 
 _atom_site_disorder_group 
Y1 Y 0.63312(4) 0.93672(3) 0.66131(3) 0.02113(14) Uani 1 1 d . . . 
C1 C 0.5569(4) 0.7450(4) 0.5437(4) 0.0244(8) Uani 1 1 d . . . 
C2 C 0.5284(5) 0.6188(4) 0.5196(4) 0.0255(8) Uani 1 1 d . . . 
C3 C 0.5322(5) 0.6341(4) 0.3880(4) 0.0299(9) Uani 1 1 d . . . 
H3A H 0.5538 0.7227 0.3140 0.036 Uiso 1 1 calc R . . 
C4 C 0.4966(5) 0.4844(4) 0.6310(4) 0.0288(8) Uani 1 1 d . . . 
H4A H 0.4948 0.4752 0.7184 0.035 Uiso 1 1 calc R . . 
C5 C 0.3259(5) 0.9542(4) 0.8390(4) 0.0242(8) Uani 1 1 d . . . 
C6 C 0.1566(5) 0.9792(4) 0.9213(4) 0.0262(8) Uani 1 1 d . . . 
C7 C 0.0233(5) 0.9101(5) 0.9314(4) 0.0324(9) Uani 1 1 d . . . 
H7A H 0.0416 0.8489 0.8842 0.039 Uiso 1 1 calc R . . 
C8 C -0.1325(5) 0.9302(4) 1.0084(4) 0.0323(9) Uani 1 1 d . . . 
H8A H -0.2190 0.8843 1.0132 0.039 Uiso 1 1 calc R . . 
C9 C 0.8231(5) 0.7295(4) 0.8202(4) 0.0260(8) Uani 1 1 d . . . 
C10 C 0.9166(5) 0.6087(4) 0.9116(4) 0.0263(8) Uani 1 1 d . . . 
C11 C 0.8356(5) 0.5301(5) 1.0510(5) 0.0384(10) Uani 1 1 d . . . 
H11A H 0.7242 0.5520 1.0839 0.046 Uiso 1 1 calc R . . 
C12 C 1.0804(5) 0.5780(5) 0.8619(4) 0.0370(10) Uani 1 1 d . . . 
H12A H 1.1342 0.6292 0.7708 0.044 Uiso 1 1 calc R . . 
C13 C 0.7563(6) 1.1709(4) 0.7450(5) 0.0370(10) Uani 1 1 d . . . 
H13A H 0.6632 1.1583 0.8185 0.044 Uiso 1 1 calc R . . 
C14 C 0.8213(8) 1.3579(6) 0.7974(6) 0.0627(15) Uani 1 1 d U . . 
H14A H 0.7209 1.3311 0.8680 0.094 Uiso 1 1 calc R . . 
H14B H 0.8096 1.4589 0.7386 0.094 Uiso 1 1 calc R . . 
H14C H 0.9090 1.3429 0.8389 0.094 Uiso 1 1 calc R . . 
C15 C 1.0128(8) 1.2898(7) 0.6089(7) 0.0739(17) Uani 1 1 d U . . 
H15A H 1.0218 1.2267 0.5619 0.111 Uiso 1 1 calc R . . 
H15B H 1.1034 1.2663 0.6492 0.111 Uiso 1 1 calc R . . 
H15C H 1.0143 1.3895 0.5447 0.111 Uiso 1 1 calc R . . 
N1 N 0.8575(5) 1.2699(4) 0.7181(4) 0.0437(9) Uani 1 1 d U . . 
O1 O 0.5184(4) 0.8722(3) 0.4684(3) 0.0343(7) Uani 1 1 d . . . 
O2 O 0.6223(4) 0.7203(3) 0.6386(3) 0.0363(7) Uani 1 1 d . . . 
O3 O 0.3446(3) 0.8775(3) 0.7703(3) 0.0275(6) Uani 1 1 d . . . 
O4 O 0.4474(3) 1.0115(3) 0.8356(3) 0.0316(6) Uani 1 1 d . . . 
O5 O 0.8950(3) 0.8032(3) 0.6942(3) 0.0307(6) Uani 1 1 d . . . 
O6 O 0.6737(3) 0.7551(3) 0.8732(3) 0.0350(7) Uani 1 1 d . . . 
O7 O 0.7804(4) 1.0961(3) 0.6775(3) 0.0372(7) Uani 1 1 d . . . 
O1W O 0.8145(3) 1.0327(3) 0.4351(3) 0.0348(7) Uani 1 1 d . . . 
H1A H 0.7760 1.0420 0.3699 0.08(2) Uiso 1 1 d R . . 
H1B H 0.8969 1.0835 0.4001 0.065(18) Uiso 1 1 d R . . 
 
loop_ 
 _atom_site_aniso_label 
 _atom_site_aniso_U_11 
 _atom_site_aniso_U_22 
 _atom_site_aniso_U_33 
 _atom_site_aniso_U_23 
 _atom_site_aniso_U_13 
 _atom_site_aniso_U_12 
Y1 0.0203(2) 0.01922(19) 0.0270(2) -0.01126(14) -0.00955(14) 0.00287(13) 
C1 0.0207(18) 0.0223(17) 0.034(2) -0.0155(16) -0.0070(16) 0.0012(14) 
C2 0.027(2) 0.0215(17) 0.034(2) -0.0151(16) -0.0141(17) 0.0066(14) 
C3 0.037(2) 0.0217(17) 0.032(2) -0.0090(16) -0.0139(18) -0.0007(16) 
C4 0.039(2) 0.0257(18) 0.030(2) -0.0151(16) -0.0160(18) 0.0018(16) 
C5 0.027(2) 0.0220(17) 0.0225(19) -0.0083(15) -0.0065(15) 0.0008(14) 
C6 0.027(2) 0.0277(18) 0.0243(19) -0.0106(16) -0.0072(16) 0.0000(15) 
C7 0.031(2) 0.039(2) 0.036(2) -0.0246(18) -0.0039(18) -0.0047(17) 
C8 0.026(2) 0.039(2) 0.039(2) -0.0222(19) -0.0065(18) -0.0044(17) 
C9 0.030(2) 0.0231(17) 0.033(2) -0.0148(16) -0.0165(17) 0.0039(15) 
C10 0.027(2) 0.0256(18) 0.031(2) -0.0125(16) -0.0162(17) 0.0056(15) 
C11 0.028(2) 0.042(2) 0.038(2) -0.0096(19) -0.0136(19) 0.0096(18) 
C12 0.037(2) 0.036(2) 0.027(2) -0.0055(17) -0.0082(18) 0.0070(18) 
C13 0.040(3) 0.031(2) 0.048(3) -0.017(2) -0.022(2) 0.0013(18) 
C14 0.071(2) 0.058(2) 0.069(2) -0.0305(16) -0.0259(17) -0.0017(16) 
C15 0.071(2) 0.069(2) 0.082(2) -0.0291(18) -0.0162(18) -0.0132(17) 
N1 0.0484(17) 0.0391(15) 0.0529(17) -0.0217(13) -0.0208(14) -0.0018(13) 
O1 0.0380(17) 0.0186(12) 0.0426(17) -0.0102(12) -0.0112(13) 0.0036(11) 
O2 0.0445(18) 0.0308(14) 0.0497(19) -0.0239(14) -0.0263(15) 0.0051(12) 
O3 0.0283(14) 0.0295(13) 0.0302(15) -0.0180(12) -0.0084(11) 0.0021(11) 
O4 0.0266(15) 0.0382(15) 0.0402(16) -0.0261(13) -0.0077(12) -0.0009(12) 
O5 0.0281(15) 0.0304(14) 0.0343(16) -0.0105(12) -0.0154(12) 0.0036(11) 
O6 0.0290(16) 0.0405(15) 0.0348(16) -0.0158(13) -0.0134(13) 0.0100(12) 
O7 0.0339(16) 0.0378(15) 0.0519(19) -0.0277(15) -0.0134(14) -0.0009(13) 
O1W 0.0277(15) 0.0477(17) 0.0305(15) -0.0135(13) -0.0100(12) -0.0054(13) 
 
_geom_special_details 
; 
 All esds (except the esd in the dihedral angle between two l.s. planes) 
 are estimated using the full covariance matrix.  The cell esds are taken 
 into account individually in the estimation of esds in distances, angles 
 and torsion angles; correlations between esds in cell parameters are only 
 used when they are defined by crystal symmetry.  An approximate (isotropic) 
 treatment of cell esds is used for estimating esds involving l.s. planes. 
; 
 
loop_ 
 _geom_bond_atom_site_label_1 
 _geom_bond_atom_site_label_2 
 _geom_bond_distance 
 _geom_bond_site_symmetry_2 
 _geom_bond_publ_flag 
Y1 O1 2.317(3) 2_676 ? 
Y1 O2 2.330(3) . ? 
Y1 O7 2.332(3) . ? 
Y1 O4 2.381(3) . ? 
Y1 O6 2.381(3) . ? 
Y1 O1W 2.401(3) . ? 
Y1 O5 2.439(3) . ? 
Y1 O3 2.466(3) . ? 
Y1 C9 2.748(4) . ? 
Y1 C5 2.781(4) . ? 
Y1 C1 3.011(4) . ? 
C1 O1 1.252(4) . ? 
C1 O2 1.260(5) . ? 
C1 C2 1.488(5) . ? 
C2 C3 1.393(5) . ? 
C2 C4 1.406(5) . ? 
C3 C4 1.381(5) 2_666 ? 
C3 H3A 0.9300 . ? 
C4 C3 1.381(5) 2_666 ? 
C4 H4A 0.9300 . ? 
C5 O3 1.257(4) . ? 
C5 O4 1.277(5) . ? 
C5 C6 1.494(5) . ? 
C6 C8 1.383(5) 2_577 ? 
C6 C7 1.411(6) . ? 
C7 C8 1.373(6) . ? 
C7 H7A 0.9300 . ? 
C8 C6 1.383(5) 2_577 ? 
C8 H8A 0.9300 . ? 
C9 O6 1.260(5) . ? 
C9 O5 1.287(5) . ? 
C9 C10 1.502(5) . ? 
C10 C12 1.368(6) . ? 
C10 C11 1.420(6) . ? 
C11 C12 1.377(6) 2_767 ? 
C11 H11A 0.9300 . ? 
C12 C11 1.377(6) 2_767 ? 
C12 H12A 0.9300 . ? 
C13 O7 1.222(5) . ? 
C13 N1 1.335(6) . ? 
C13 H13A 0.9300 . ? 
C14 N1 1.428(7) . ? 
C14 H14A 0.9600 . ? 
C14 H14B 0.9600 . ? 
C14 H14C 0.9600 . ? 
C15 N1 1.475(8) . ? 
C15 H15A 0.9600 . ? 
C15 H15B 0.9600 . ? 
C15 H15C 0.9600 . ? 
O1 Y1 2.317(3) 2_676 ? 
O1W H1A 0.8500 . ? 
O1W H1B 0.8500 . ? 
 
loop_ 
 _geom_angle_atom_site_label_1 
 _geom_angle_atom_site_label_2 
 _geom_angle_atom_site_label_3 
 _geom_angle 
 _geom_angle_site_symmetry_1 
 _geom_angle_site_symmetry_3 
 _geom_angle_publ_flag 
O1 Y1 O2 111.27(10) 2_676 . ? 
O1 Y1 O7 92.15(10) 2_676 . ? 
O2 Y1 O7 150.25(11) . . ? 
O1 Y1 O4 79.51(10) 2_676 . ? 
O2 Y1 O4 124.03(11) . . ? 
O7 Y1 O4 76.79(10) . . ? 
O1 Y1 O6 152.62(11) 2_676 . ? 
O2 Y1 O6 77.28(10) . . ? 
O7 Y1 O6 90.37(11) . . ? 
O4 Y1 O6 74.55(10) . . ? 
O1 Y1 O1W 74.34(10) 2_676 . ? 
O2 Y1 O1W 91.86(11) . . ? 
O7 Y1 O1W 76.61(11) . . ? 
O4 Y1 O1W 141.60(10) . . ? 
O6 Y1 O1W 132.56(10) . . ? 
O1 Y1 O5 150.86(10) 2_676 . ? 
O2 Y1 O5 76.51(10) . . ? 
O7 Y1 O5 74.26(10) . . ? 
O4 Y1 O5 120.53(9) . . ? 
O6 Y1 O5 55.14(9) . . ? 
O1W Y1 O5 77.43(9) . . ? 
O1 Y1 O3 74.55(10) 2_676 . ? 
O2 Y1 O3 75.47(10) . . ? 
O7 Y1 O3 130.41(10) . . ? 
O4 Y1 O3 54.04(9) . . ? 
O6 Y1 O3 83.13(9) . . ? 
O1W Y1 O3 139.06(9) . . ? 
O5 Y1 O3 133.75(9) . . ? 
O1 Y1 C9 174.54(10) 2_676 . ? 
O2 Y1 C9 74.15(10) . . ? 
O7 Y1 C9 82.50(11) . . ? 
O4 Y1 C9 98.11(11) . . ? 
O6 Y1 C9 27.26(11) . . ? 
O1W Y1 C9 105.30(11) . . ? 
O5 Y1 C9 27.92(11) . . ? 
O3 Y1 C9 108.12(10) . . ? 
O1 Y1 C5 73.92(10) 2_676 . ? 
O2 Y1 C5 100.44(11) . . ? 
O7 Y1 C5 103.64(11) . . ? 
O4 Y1 C5 27.25(10) . . ? 
O6 Y1 C5 78.99(10) . . ? 
O1W Y1 C5 148.25(10) . . ? 
O5 Y1 C5 133.81(10) . . ? 
O3 Y1 C5 26.87(10) . . ? 
C9 Y1 C5 106.20(11) . . ? 
O1 Y1 C1 88.51(10) 2_676 . ? 
O2 Y1 C1 23.08(10) . . ? 
O7 Y1 C1 157.36(11) . . ? 
O4 Y1 C1 125.45(10) . . ? 
O6 Y1 C1 99.36(10) . . ? 
O1W Y1 C1 81.81(10) . . ? 
O5 Y1 C1 94.56(9) . . ? 
O3 Y1 C1 71.44(9) . . ? 
C9 Y1 C1 96.85(10) . . ? 
C5 Y1 C1 98.29(10) . . ? 
O1 C1 O2 121.8(3) . . ? 
O1 C1 C2 119.7(3) . . ? 
O2 C1 C2 118.5(3) . . ? 
O1 C1 Y1 75.5(2) . . ? 
O2 C1 Y1 46.48(17) . . ? 
C2 C1 Y1 164.6(3) . . ? 
C3 C2 C4 120.3(3) . . ? 
C3 C2 C1 120.3(3) . . ? 
C4 C2 C1 119.5(3) . . ? 
C4 C3 C2 119.0(4) 2_666 . ? 
C4 C3 H3A 120.5 2_666 . ? 
C2 C3 H3A 120.5 . . ? 
C3 C4 C2 120.7(4) 2_666 . ? 
C3 C4 H4A 119.6 2_666 . ? 
C2 C4 H4A 119.6 . . ? 
O3 C5 O4 120.8(3) . . ? 
O3 C5 C6 117.9(3) . . ? 
O4 C5 C6 121.3(3) . . ? 
O3 C5 Y1 62.4(2) . . ? 
O4 C5 Y1 58.64(19) . . ? 
C6 C5 Y1 173.5(3) . . ? 
C8 C6 C7 119.8(4) 2_577 . ? 
C8 C6 C5 118.6(4) 2_577 . ? 
C7 C6 C5 121.6(3) . . ? 
C8 C7 C6 122.3(4) . . ? 
C8 C7 H7A 118.9 . . ? 
C6 C7 H7A 118.9 . . ? 
C7 C8 C6 117.9(4) . 2_577 ? 
C7 C8 H8A 121.0 . . ? 
C6 C8 H8A 121.0 2_577 . ? 
O6 C9 O5 122.4(3) . . ? 
O6 C9 C10 117.0(3) . . ? 
O5 C9 C10 120.7(3) . . ? 
O6 C9 Y1 59.95(19) . . ? 
O5 C9 Y1 62.57(18) . . ? 
C10 C9 Y1 175.7(3) . . ? 
C12 C10 C11 120.1(3) . . ? 
C12 C10 C9 120.1(4) . . ? 
C11 C10 C9 119.8(4) . . ? 
C12 C11 C10 120.9(4) 2_767 . ? 
C12 C11 H11A 119.5 2_767 . ? 
C10 C11 H11A 119.5 . . ? 
C10 C12 C11 118.9(4) . 2_767 ? 
C10 C12 H12A 120.5 . . ? 
C11 C12 H12A 120.5 2_767 . ? 
O7 C13 N1 123.0(5) . . ? 
O7 C13 H13A 118.5 . . ? 
N1 C13 H13A 118.5 . . ? 
N1 C14 H14A 109.5 . . ? 
N1 C14 H14B 109.5 . . ? 
H14A C14 H14B 109.5 . . ? 
N1 C14 H14C 109.5 . . ? 
H14A C14 H14C 109.5 . . ? 
H14B C14 H14C 109.5 . . ? 
N1 C15 H15A 109.5 . . ? 
N1 C15 H15B 109.5 . . ? 
H15A C15 H15B 109.5 . . ? 
N1 C15 H15C 109.5 . . ? 
H15A C15 H15C 109.5 . . ? 
H15B C15 H15C 109.5 . . ? 
C13 N1 C14 120.9(5) . . ? 
C13 N1 C15 121.7(4) . . ? 
C14 N1 C15 117.4(5) . . ? 
C1 O1 Y1 158.8(3) . 2_676 ? 
C1 O2 Y1 110.4(2) . . ? 
C5 O3 Y1 90.7(2) . . ? 
C5 O4 Y1 94.1(2) . . ? 
C9 O5 Y1 89.5(2) . . ? 
C9 O6 Y1 92.8(2) . . ? 
C13 O7 Y1 136.5(3) . . ? 
Y1 O1W H1A 115.1 . . ? 
Y1 O1W H1B 134.2 . . ? 
H1A O1W H1B 107.7 . . ? 
 
_diffrn_measured_fraction_theta_max    0.986 
_diffrn_reflns_theta_full              26.00 
_diffrn_measured_fraction_theta_full   0.986 
_refine_diff_density_max    1.128 
_refine_diff_density_min   -0.638 
_refine_diff_density_rms    0.113 

#===END


data_5Dy
_database_code_depnum_ccdc_archive 'CCDC 745289'
_audit_creation_method           SHELXL-97
_chemical_name_systematic        
;
?
;
_chemical_name_common             ? 
_chemical_melting_point           ? 
_chemical_formula_moiety          'C15 H15 Dy N O8' 
_chemical_formula_sum 
 'C15 H15 Dy N O8' 
_chemical_formula_weight          499.78 
 
loop_ 
 _atom_type_symbol 
 _atom_type_description 
 _atom_type_scat_dispersion_real 
 _atom_type_scat_dispersion_imag 
 _atom_type_scat_source 
 'C'  'C'   0.0033   0.0016 
 'International Tables Vol C Tables 4.2.6.8 and 6.1.1.4' 
 'H'  'H'   0.0000   0.0000 
 'International Tables Vol C Tables 4.2.6.8 and 6.1.1.4' 
 'O'  'O'   0.0106   0.0060 
 'International Tables Vol C Tables 4.2.6.8 and 6.1.1.4' 
 'Dy'  'Dy'  -0.1892   4.4098 
 'International Tables Vol C Tables 4.2.6.8 and 6.1.1.4' 
 'N'  'N'   0.0061   0.0033 
 'International Tables Vol C Tables 4.2.6.8 and 6.1.1.4' 
 
_symmetry_cell_setting            'triclinic' 
_symmetry_space_group_name_H-M    'p -1'
_symmetry_space_group_name_Hall   '-p 1'
 
loop_ 
 _symmetry_equiv_pos_as_xyz 
 'x, y, z' 
 '-x, -y, -z' 
 
_cell_length_a                    8.522(3) 
_cell_length_b                    10.154(3) 
_cell_length_c                    11.067(4) 
_cell_angle_alpha                 64.726(5) 
_cell_angle_beta                  71.738(6) 
_cell_angle_gamma                 79.581(6) 
_cell_volume                      821.1(5) 
_cell_formula_units_Z             2 
_cell_measurement_temperature     298(2) 
_cell_measurement_reflns_used     926 
_cell_measurement_theta_min       2.28 
_cell_measurement_theta_max       25.49
 
_exptl_crystal_description        block
_exptl_crystal_colour             colorless
_exptl_crystal_size_max           0.30 
_exptl_crystal_size_mid           0.26 
_exptl_crystal_size_min           0.24 
_exptl_crystal_density_meas       ? 
_exptl_crystal_density_diffrn     2.021 
_exptl_crystal_density_method     'not measured' 
_exptl_crystal_F_000              484 
_exptl_absorpt_coefficient_mu     4.594 
_exptl_absorpt_correction_type    'multi-scan' 
_exptl_absorpt_correction_T_min   0.3395 
_exptl_absorpt_correction_T_max   0.4052 
_exptl_absorpt_process_details    'SADABS(Sheldrick,2003)'
 
_exptl_special_details 
; 
 ? 
; 
 
_diffrn_ambient_temperature       298(2) 
_diffrn_radiation_wavelength      0.71073 
_diffrn_radiation_type            MoK\a 
_diffrn_radiation_source          'fine-focus sealed tube' 
_diffrn_radiation_monochromator   graphite 
_diffrn_measurement_device_type  'Bruker Smart Apex CCD area detector'
_diffrn_measurement_method       'phi and omega scans'
_diffrn_detector_area_resol_mean  ? 
_diffrn_standards_number          ? 
_diffrn_standards_interval_count  ? 
_diffrn_standards_interval_time   ? 
_diffrn_standards_decay_%         ? 
_diffrn_reflns_number             4227 
_diffrn_reflns_av_R_equivalents   0.0910 
_diffrn_reflns_av_sigmaI/netI     0.0647 
_diffrn_reflns_limit_h_min        -10 
_diffrn_reflns_limit_h_max        10 
_diffrn_reflns_limit_k_min        -12 
_diffrn_reflns_limit_k_max        11 
_diffrn_reflns_limit_l_min        -13 
_diffrn_reflns_limit_l_max        11 
_diffrn_reflns_theta_min          2.22 
_diffrn_reflns_theta_max          25.49 
_reflns_number_total              2987 
_reflns_number_gt                 2831 
_reflns_threshold_expression      >2sigma(I) 
 
_computing_data_collection        'SMART(Bruker, 2003)'
_computing_cell_refinement        'SAINTPLUS(Bruker, 2003)'
_computing_data_reduction         'SAINTPLUS'
_computing_structure_solution     'SHELXS-97 (Sheldrick, 2008)' 
_computing_structure_refinement   'SHELXL-97 (Sheldrick, 2008)' 
_computing_molecular_graphics     'SHELXTL(Bruker, 2008)' 
_computing_publication_material   'SHELXTL'
 
_refine_special_details 
; 
 Refinement of F^2^ against ALL reflections.  The weighted R-factor wR and 
 goodness of fit S are based on F^2^, conventional R-factors R are based 
 on F, with F set to zero for negative F^2^. The threshold expression of 
 F^2^ > 2sigma(F^2^) is used only for calculating R-factors(gt) etc. and is 
 not relevant to the choice of reflections for refinement.  R-factors based 
 on F^2^ are statistically about twice as large as those based on F, and R- 
 factors based on ALL data will be even larger. 
; 
 
_refine_ls_structure_factor_coef  Fsqd  
_refine_ls_matrix_type            full 
_refine_ls_weighting_scheme       calc  
_refine_ls_weighting_details 
 'calc w=1/[\s^2^(Fo^2^)+(0.0529P)^2^+0.0000P] where P=(Fo^2^+2Fc^2^)/3' 
_atom_sites_solution_primary      direct 
_atom_sites_solution_secondary    difmap 
_atom_sites_solution_hydrogens    geom 
_refine_ls_hydrogen_treatment     constr 
_refine_ls_extinction_method      none 
_refine_ls_extinction_coef        ? 
_refine_ls_number_reflns          2987 
_refine_ls_number_parameters      228 
_refine_ls_number_restraints      0 
_refine_ls_R_factor_all           0.0369 
_refine_ls_R_factor_gt            0.0353 
_refine_ls_wR_factor_ref          0.0866 
_refine_ls_wR_factor_gt           0.0858 
_refine_ls_goodness_of_fit_ref    1.043 
_refine_ls_restrained_S_all       1.043 
_refine_ls_shift/su_max           0.001 
_refine_ls_shift/su_mean          0.000 
 
loop_ 
 _atom_site_label 
 _atom_site_type_symbol 
 _atom_site_fract_x 
 _atom_site_fract_y 
 _atom_site_fract_z 
 _atom_site_U_iso_or_equiv 
 _atom_site_adp_type 
 _atom_site_occupancy 
 _atom_site_symmetry_multiplicity 
 _atom_site_calc_flag 
 _atom_site_refinement_flags 
 _atom_site_disorder_assembly 
 _atom_site_disorder_group 
Dy1 Dy 0.63217(2) 0.93817(2) 0.65651(2) 0.02008(11) Uani 1 1 d . . . 
C1 C 0.5637(6) 0.7402(6) 0.5489(5) 0.0229(10) Uani 1 1 d . . . 
C2 C 0.5303(6) 0.6162(6) 0.5217(5) 0.0241(10) Uani 1 1 d . . . 
C3 C 0.5382(6) 0.6327(6) 0.3895(6) 0.0284(11) Uani 1 1 d . . . 
H3A H 0.5650 0.7214 0.3151 0.034 Uiso 1 1 calc R . . 
C4 C 0.4938(7) 0.4831(6) 0.6314(6) 0.0287(11) Uani 1 1 d . . . 
H4A H 0.4908 0.4717 0.7200 0.034 Uiso 1 1 calc R . . 
C5 C 0.3248(6) 0.9581(6) 0.8339(5) 0.0240(10) Uani 1 1 d . . . 
C6 C 0.1555(6) 0.9801(6) 0.9199(5) 0.0256(11) Uani 1 1 d . . . 
C7 C 0.0233(7) 0.9114(7) 0.9286(6) 0.0297(12) Uani 1 1 d . . . 
H7A H 0.0393 0.8528 0.8797 0.036 Uiso 1 1 calc R . . 
C8 C -0.1319(7) 0.9301(7) 1.0097(6) 0.0318(12) Uani 1 1 d . . . 
H8A H -0.2203 0.8826 1.0171 0.038 Uiso 1 1 calc R . . 
C9 C 0.8249(6) 0.7310(6) 0.8198(6) 0.0261(11) Uani 1 1 d . . . 
C10 C 0.9174(7) 0.6110(6) 0.9109(5) 0.0251(11) Uani 1 1 d . . . 
C11 C 0.8369(7) 0.5361(7) 1.0495(6) 0.0364(13) Uani 1 1 d . . . 
H11A H 0.7260 0.5602 1.0831 0.044 Uiso 1 1 calc R . . 
C12 C 1.0808(7) 0.5735(7) 0.8620(6) 0.0356(13) Uani 1 1 d . . . 
H12A H 1.1358 0.6219 0.7693 0.043 Uiso 1 1 calc R . . 
C13 C 0.7514(8) 1.1719(7) 0.7455(7) 0.0388(15) Uani 1 1 d . . . 
H13 H 0.6565 1.1576 0.8189 0.047 Uiso 1 1 calc R . . 
C14 C 0.8146(12) 1.3547(9) 0.8032(11) 0.075(3) Uani 1 1 d . . . 
H14A H 0.7128 1.3259 0.8740 0.112 Uiso 1 1 calc R . . 
H14B H 0.8038 1.4560 0.7444 0.112 Uiso 1 1 calc R . . 
H14C H 0.9026 1.3397 0.8455 0.112 Uiso 1 1 calc R . . 
C15 C 1.0044(10) 1.2922(11) 0.6096(11) 0.082(3) Uani 1 1 d . . . 
H15A H 1.0129 1.2291 0.5631 0.123 Uiso 1 1 calc R . . 
H15B H 1.0974 1.2717 0.6475 0.123 Uiso 1 1 calc R . . 
H15C H 1.0034 1.3920 0.5448 0.123 Uiso 1 1 calc R . . 
N1 N 0.8519(8) 1.2676(7) 0.7211(7) 0.0536(16) Uani 1 1 d . . . 
O1 O 0.5270(4) 0.8699(4) 0.4756(4) 0.0282(8) Uani 1 1 d . . . 
O2 O 0.6288(5) 0.7112(5) 0.6439(5) 0.0365(10) Uani 1 1 d . . . 
O3 O 0.3453(4) 0.8784(4) 0.7670(4) 0.0265(8) Uani 1 1 d . . . 
O4 O 0.4438(4) 1.0182(4) 0.8291(4) 0.0290(8) Uani 1 1 d . . . 
O5 O 0.8968(4) 0.8020(4) 0.6934(4) 0.0302(8) Uani 1 1 d . . . 
O6 O 0.6760(4) 0.7619(5) 0.8700(4) 0.0324(9) Uani 1 1 d . . . 
O7 O 0.7763(5) 1.0993(5) 0.6755(4) 0.0370(9) Uani 1 1 d . . . 
O1W O 0.8164(5) 1.0358(5) 0.4336(4) 0.0355(9) Uani 1 1 d . . . 
H1A H 0.7738 1.0494 0.3690 0.042(19) Uiso 1 1 d R . . 
H1B H 0.8991 1.0887 0.3982 0.08(3) Uiso 1 1 d R . . 
 
loop_ 
 _atom_site_aniso_label 
 _atom_site_aniso_U_11 
 _atom_site_aniso_U_22 
 _atom_site_aniso_U_33 
 _atom_site_aniso_U_23 
 _atom_site_aniso_U_13 
 _atom_site_aniso_U_12 
Dy1 0.01893(16) 0.01813(16) 0.02338(16) -0.00726(11) -0.00632(10) -0.00270(9) 
C1 0.020(2) 0.020(3) 0.030(3) -0.013(2) -0.005(2) -0.0010(19) 
C2 0.023(2) 0.018(3) 0.035(3) -0.011(2) -0.011(2) 0.0003(19) 
C3 0.034(3) 0.019(3) 0.029(3) -0.004(2) -0.009(2) -0.007(2) 
C4 0.037(3) 0.026(3) 0.026(3) -0.011(2) -0.010(2) -0.005(2) 
C5 0.029(3) 0.021(3) 0.019(2) -0.004(2) -0.007(2) -0.002(2) 
C6 0.025(3) 0.026(3) 0.024(2) -0.010(2) -0.002(2) -0.005(2) 
C7 0.026(3) 0.036(3) 0.034(3) -0.022(3) -0.001(2) -0.009(2) 
C8 0.031(3) 0.032(3) 0.037(3) -0.018(3) -0.003(2) -0.010(2) 
C9 0.030(3) 0.024(3) 0.030(3) -0.010(2) -0.012(2) -0.006(2) 
C10 0.030(3) 0.021(3) 0.028(3) -0.009(2) -0.013(2) -0.002(2) 
C11 0.025(3) 0.038(3) 0.034(3) -0.006(3) -0.007(2) 0.005(2) 
C12 0.032(3) 0.034(3) 0.029(3) -0.003(2) -0.006(2) -0.001(2) 
C13 0.040(3) 0.033(4) 0.051(4) -0.017(3) -0.025(3) 0.003(3) 
C14 0.116(7) 0.038(4) 0.113(7) -0.039(5) -0.081(6) 0.009(4) 
C15 0.054(5) 0.064(6) 0.118(8) -0.029(6) -0.003(5) -0.032(4) 
N1 0.069(4) 0.030(3) 0.080(4) -0.024(3) -0.044(4) 0.000(3) 
O1 0.0275(19) 0.0190(19) 0.036(2) -0.0102(16) -0.0064(16) -0.0015(15) 
O2 0.049(2) 0.027(2) 0.047(2) -0.0187(19) -0.026(2) 0.0033(18) 
O3 0.0258(18) 0.028(2) 0.0268(18) -0.0121(16) -0.0045(15) -0.0062(15) 
O4 0.0223(18) 0.035(2) 0.036(2) -0.0198(18) -0.0057(15) -0.0055(16) 
O5 0.0273(19) 0.028(2) 0.0291(19) -0.0023(16) -0.0104(16) -0.0051(16) 
O6 0.029(2) 0.037(2) 0.0294(19) -0.0119(17) -0.0101(16) 0.0035(17) 
O7 0.038(2) 0.034(2) 0.046(2) -0.018(2) -0.0134(19) -0.0121(18) 
O1W 0.0257(19) 0.051(3) 0.0253(19) -0.0078(18) -0.0044(16) -0.0137(18) 
 
_geom_special_details 
; 
 All esds (except the esd in the dihedral angle between two l.s. planes) 
 are estimated using the full covariance matrix.  The cell esds are taken 
 into account individually in the estimation of esds in distances, angles 
 and torsion angles; correlations between esds in cell parameters are only 
 used when they are defined by crystal symmetry.  An approximate (isotropic) 
 treatment of cell esds is used for estimating esds involving l.s. planes. 
; 
 
loop_ 
 _geom_bond_atom_site_label_1 
 _geom_bond_atom_site_label_2 
 _geom_bond_distance 
 _geom_bond_site_symmetry_2 
 _geom_bond_publ_flag 
Dy1 O7 2.327(4) . ? 
Dy1 O1W 2.362(4) . ? 
Dy1 O6 2.372(4) . ? 
Dy1 O1 2.372(4) 2_676 ? 
Dy1 O2 2.373(4) . ? 
Dy1 O4 2.412(4) . ? 
Dy1 O3 2.422(3) . ? 
Dy1 O5 2.476(4) . ? 
Dy1 C5 2.771(5) . ? 
Dy1 C9 2.784(5) . ? 
Dy1 O1 2.798(4) . ? 
Dy1 C1 2.951(5) . ? 
C1 O2 1.242(7) . ? 
C1 O1 1.261(6) . ? 
C1 C2 1.504(7) . ? 
C2 C3 1.380(7) . ? 
C2 C4 1.382(7) . ? 
C3 C4 1.378(8) 2_666 ? 
C3 H3A 0.9300 . ? 
C4 C3 1.378(8) 2_666 ? 
C4 H4A 0.9300 . ? 
C5 O4 1.251(6) . ? 
C5 O3 1.270(6) . ? 
C5 C6 1.497(7) . ? 
C6 C8 1.387(8) 2_577 ? 
C6 C7 1.387(8) . ? 
C7 C8 1.379(8) . ? 
C7 H7A 0.9300 . ? 
C8 C6 1.387(8) 2_577 ? 
C8 H8A 0.9300 . ? 
C9 O6 1.257(6) . ? 
C9 O5 1.270(7) . ? 
C9 C10 1.491(8) . ? 
C10 C12 1.374(8) . ? 
C10 C11 1.391(8) . ? 
C11 C12 1.381(8) 2_767 ? 
C11 H11A 0.9300 . ? 
C12 C11 1.381(8) 2_767 ? 
C12 H12A 0.9300 . ? 
C13 O7 1.232(8) . ? 
C13 N1 1.297(9) . ? 
C13 H13 0.9300 . ? 
C14 N1 1.453(10) . ? 
C14 H14A 0.9600 . ? 
C14 H14B 0.9600 . ? 
C14 H14C 0.9600 . ? 
C15 N1 1.457(11) . ? 
C15 H15A 0.9600 . ? 
C15 H15B 0.9600 . ? 
C15 H15C 0.9600 . ? 
O1 Dy1 2.372(4) 2_676 ? 
O1W H1A 0.8501 . ? 
O1W H1B 0.8500 . ? 
 
loop_ 
 _geom_angle_atom_site_label_1 
 _geom_angle_atom_site_label_2 
 _geom_angle_atom_site_label_3 
 _geom_angle 
 _geom_angle_site_symmetry_1 
 _geom_angle_site_symmetry_3 
 _geom_angle_publ_flag 
O7 Dy1 O1W 76.99(15) . . ? 
O7 Dy1 O6 88.30(15) . . ? 
O1W Dy1 O6 131.31(13) . . ? 
O7 Dy1 O1 92.62(14) . 2_676 ? 
O1W Dy1 O1 75.77(13) . 2_676 ? 
O6 Dy1 O1 152.05(13) . 2_676 ? 
O7 Dy1 O2 148.66(15) . . ? 
O1W Dy1 O2 93.33(15) . . ? 
O6 Dy1 O2 75.77(14) . . ? 
O1 Dy1 O2 114.08(13) 2_676 . ? 
O7 Dy1 O4 74.48(14) . . ? 
O1W Dy1 O4 139.76(15) . . ? 
O6 Dy1 O4 75.54(13) . . ? 
O1 Dy1 O4 77.81(13) 2_676 . ? 
O2 Dy1 O4 125.23(15) . . ? 
O7 Dy1 O3 128.22(14) . . ? 
O1W Dy1 O3 140.55(12) . . ? 
O6 Dy1 O3 84.01(12) . . ? 
O1 Dy1 O3 73.54(13) 2_676 . ? 
O2 Dy1 O3 77.45(14) . . ? 
O4 Dy1 O3 53.99(12) . . ? 
O7 Dy1 O5 75.72(14) . . ? 
O1W Dy1 O5 77.54(13) . . ? 
O6 Dy1 O5 53.80(12) . . ? 
O1 Dy1 O5 152.68(13) 2_676 . ? 
O2 Dy1 O5 73.09(14) . . ? 
O4 Dy1 O5 120.97(12) . . ? 
O3 Dy1 O5 132.96(12) . . ? 
O7 Dy1 C5 101.00(15) . . ? 
O1W Dy1 C5 148.10(14) . . ? 
O6 Dy1 C5 79.89(13) . . ? 
O1 Dy1 C5 72.52(14) 2_676 . ? 
O2 Dy1 C5 102.47(16) . . ? 
O4 Dy1 C5 26.80(14) . . ? 
O3 Dy1 C5 27.26(14) . . ? 
O5 Dy1 C5 133.45(13) . . ? 
O7 Dy1 C9 82.44(15) . . ? 
O1W Dy1 C9 104.68(15) . . ? 
O6 Dy1 C9 26.72(14) . . ? 
O1 Dy1 C9 174.74(13) 2_676 . ? 
O2 Dy1 C9 71.17(15) . . ? 
O4 Dy1 C9 99.05(14) . . ? 
O3 Dy1 C9 108.15(14) . . ? 
O5 Dy1 C9 27.15(14) . . ? 
C5 Dy1 C9 106.59(15) . . ? 
O7 Dy1 O1 145.53(13) . . ? 
O1W Dy1 O1 71.70(13) . . ? 
O6 Dy1 O1 123.35(13) . . ? 
O1 Dy1 O1 66.22(14) 2_676 . ? 
O2 Dy1 O1 49.10(12) . . ? 
O4 Dy1 O1 122.92(11) . . ? 
O3 Dy1 O1 73.58(11) . . ? 
O5 Dy1 O1 110.34(12) . . ? 
C5 Dy1 O1 98.08(13) . . ? 
C9 Dy1 O1 118.97(14) . . ? 
O7 Dy1 C1 158.46(15) . . ? 
O1W Dy1 C1 83.15(14) . . ? 
O6 Dy1 C1 98.79(15) . . ? 
O1 Dy1 C1 90.49(14) 2_676 . ? 
O2 Dy1 C1 23.99(14) . . ? 
O4 Dy1 C1 126.95(13) . . ? 
O3 Dy1 C1 73.00(13) . . ? 
O5 Dy1 C1 92.04(13) . . ? 
C5 Dy1 C1 100.26(15) . . ? 
C9 Dy1 C1 94.77(15) . . ? 
O1 Dy1 C1 25.15(13) . . ? 
O2 C1 O1 121.4(5) . . ? 
O2 C1 C2 118.4(5) . . ? 
O1 C1 C2 120.2(5) . . ? 
O2 C1 Dy1 50.9(3) . . ? 
O1 C1 Dy1 70.6(3) . . ? 
C2 C1 Dy1 168.6(4) . . ? 
C3 C2 C4 119.9(5) . . ? 
C3 C2 C1 121.2(5) . . ? 
C4 C2 C1 119.0(5) . . ? 
C4 C3 C2 119.6(5) 2_666 . ? 
C4 C3 H3A 120.2 2_666 . ? 
C2 C3 H3A 120.2 . . ? 
C3 C4 C2 120.6(5) 2_666 . ? 
C3 C4 H4A 119.7 2_666 . ? 
C2 C4 H4A 119.7 . . ? 
O4 C5 O3 121.0(5) . . ? 
O4 C5 C6 119.7(5) . . ? 
O3 C5 C6 119.3(5) . . ? 
O4 C5 Dy1 60.4(3) . . ? 
O3 C5 Dy1 60.9(3) . . ? 
C6 C5 Dy1 175.2(4) . . ? 
C8 C6 C7 120.3(5) 2_577 . ? 
C8 C6 C5 119.5(5) 2_577 . ? 
C7 C6 C5 120.2(5) . . ? 
C8 C7 C6 120.0(5) . . ? 
C8 C7 H7A 120.0 . . ? 
C6 C7 H7A 120.0 . . ? 
C7 C8 C6 119.7(5) . 2_577 ? 
C7 C8 H8A 120.2 . . ? 
C6 C8 H8A 120.2 2_577 . ? 
O6 C9 O5 120.6(5) . . ? 
O6 C9 C10 119.2(5) . . ? 
O5 C9 C10 120.2(5) . . ? 
O6 C9 Dy1 58.0(3) . . ? 
O5 C9 Dy1 62.8(3) . . ? 
C10 C9 Dy1 175.1(4) . . ? 
C12 C10 C11 119.0(5) . . ? 
C12 C10 C9 121.7(5) . . ? 
C11 C10 C9 119.2(5) . . ? 
C12 C11 C10 121.0(5) 2_767 . ? 
C12 C11 H11A 119.5 2_767 . ? 
C10 C11 H11A 119.5 . . ? 
C10 C12 C11 120.0(5) . 2_767 ? 
C10 C12 H12A 120.0 . . ? 
C11 C12 H12A 120.0 2_767 . ? 
O7 C13 N1 122.7(7) . . ? 
O7 C13 H13 118.6 . . ? 
N1 C13 H13 118.6 . . ? 
N1 C14 H14A 109.5 . . ? 
N1 C14 H14B 109.5 . . ? 
H14A C14 H14B 109.5 . . ? 
N1 C14 H14C 109.5 . . ? 
H14A C14 H14C 109.5 . . ? 
H14B C14 H14C 109.5 . . ? 
N1 C15 H15A 109.5 . . ? 
N1 C15 H15B 109.5 . . ? 
H15A C15 H15B 109.5 . . ? 
N1 C15 H15C 109.5 . . ? 
H15A C15 H15C 109.5 . . ? 
H15B C15 H15C 109.5 . . ? 
C13 N1 C14 120.9(8) . . ? 
C13 N1 C15 121.1(7) . . ? 
C14 N1 C15 118.0(7) . . ? 
C1 O1 Dy1 156.1(3) . 2_676 ? 
C1 O1 Dy1 84.2(3) . . ? 
Dy1 O1 Dy1 113.78(14) 2_676 . ? 
C1 O2 Dy1 105.1(3) . . ? 
C5 O3 Dy1 91.9(3) . . ? 
C5 O4 Dy1 92.8(3) . . ? 
C9 O5 Dy1 90.1(3) . . ? 
C9 O6 Dy1 95.3(3) . . ? 
C13 O7 Dy1 137.1(4) . . ? 
Dy1 O1W H1A 113.0 . . ? 
Dy1 O1W H1B 134.8 . . ? 
H1A O1W H1B 107.7 . . ? 
 
_diffrn_measured_fraction_theta_max    0.976 
_diffrn_reflns_theta_full              25.49 
_diffrn_measured_fraction_theta_full   0.976 
_refine_diff_density_max    2.267 
_refine_diff_density_min   -2.402 
_refine_diff_density_rms    0.192 

#===END


data_7Ce
_database_code_depnum_ccdc_archive 'CCDC 745291'
_audit_creation_method           SHELXL-2000
_chemical_name_systematic        
;
?
; 
_chemical_name_common             ? 
_chemical_melting_point           ? 
_chemical_formula_moiety          ? 
_chemical_formula_sum 
 'C31 H50 Ce N3 O15 S5' 
_chemical_formula_weight          1005.16 
 
loop_ 
 _atom_type_symbol 
 _atom_type_description 
 _atom_type_scat_dispersion_real 
 _atom_type_scat_dispersion_imag 
 _atom_type_scat_source 
 'C'  'C'   0.0033   0.0016 
 'International Tables Vol C Tables 4.2.6.8 and 6.1.1.4' 
 'H'  'H'   0.0000   0.0000 
 'International Tables Vol C Tables 4.2.6.8 and 6.1.1.4' 
 'N'  'N'   0.0061   0.0033 
 'International Tables Vol C Tables 4.2.6.8 and 6.1.1.4' 
 'O'  'O'   0.0106   0.0060 
 'International Tables Vol C Tables 4.2.6.8 and 6.1.1.4' 
 'S'  'S'   0.1246   0.1234 
 'International Tables Vol C Tables 4.2.6.8 and 6.1.1.4' 
 'Ce'  'Ce'  -0.2486   2.6331 
 'International Tables Vol C Tables 4.2.6.8 and 6.1.1.4' 
 
_symmetry_cell_setting           'Monoclinic'
_symmetry_space_group_name_H-M   'C2/c  '
_symmetry_space_group_name_Hall   '-C 2yc'
 
loop_ 
 _symmetry_equiv_pos_as_xyz 
 'x, y, z' 
 '-x, y, -z+1/2' 
 'x+1/2, y+1/2, z' 
 '-x+1/2, y+1/2, -z+1/2' 
 '-x, -y, -z' 
 'x, -y, z-1/2' 
 '-x+1/2, -y+1/2, -z' 
 'x+1/2, -y+1/2, z-1/2' 
 
_cell_length_a                    27.4350(16) 
_cell_length_b                    16.8706(11) 
_cell_length_c                    28.128(2) 
_cell_angle_alpha                 90.00 
_cell_angle_beta                  102.482(14) 
_cell_angle_gamma                 90.00 
_cell_volume                      12711.0(15) 
_cell_formula_units_Z             8 
_cell_measurement_temperature     291(2) 
_cell_measurement_reflns_used     4201 
_cell_measurement_theta_min       2.34 
_cell_measurement_theta_max       28.00
 
_exptl_crystal_description        block 
_exptl_crystal_colour             red 
_exptl_crystal_size_max           0.32 
_exptl_crystal_size_mid           0.26 
_exptl_crystal_size_min           0.22 
_exptl_crystal_density_meas       ? 
_exptl_crystal_density_diffrn     1.050 
_exptl_crystal_density_method     'not measured' 
_exptl_crystal_F_000              4120 
_exptl_absorpt_coefficient_mu     0.925 
_exptl_absorpt_correction_type    'multi-scan'
_exptl_absorpt_correction_T_min   0.75 
_exptl_absorpt_correction_T_max   0.81
_exptl_absorpt_process_details    'SADABS; Bruker, 2000' 
 
_exptl_special_details 
; 
 ? 
; 
 
_diffrn_ambient_temperature       291(2) 
_diffrn_radiation_wavelength      0.71073 
_diffrn_radiation_type           'MoK\a'
_diffrn_radiation_source         'sealed tube'
_diffrn_radiation_monochromator  'graphite'
_diffrn_measurement_device_type  'Bruker Smart Apex CCD '
_diffrn_measurement_method       'phi and omega scans'
_diffrn_detector_area_resol_mean  ? 
_diffrn_standards_number          ? 
_diffrn_standards_interval_count  ? 
_diffrn_standards_interval_time   ? 
_diffrn_standards_decay_%         ? 
_diffrn_reflns_number             33822 
_diffrn_reflns_av_R_equivalents   0.0444 
_diffrn_reflns_av_sigmaI/netI     0.0693 
_diffrn_reflns_limit_h_min        -33 
_diffrn_reflns_limit_h_max        27 
_diffrn_reflns_limit_k_min        -19 
_diffrn_reflns_limit_k_max        20 
_diffrn_reflns_limit_l_min        -34 
_diffrn_reflns_limit_l_max        34 
_diffrn_reflns_theta_min          1.94 
_diffrn_reflns_theta_max          26.00 
_reflns_number_total              12426 
_reflns_number_gt                 9394 
_reflns_threshold_expression      >2sigma(I) 
 
_computing_data_collection      'SMART (Bruker, 2000)'
_computing_cell_refinement      'SMART'
_computing_data_reduction       'SAINT (Bruker, 2000)'
_computing_structure_solution   'SHELXTL (Bruker, 2000)'
_computing_structure_refinement 'SHELXTL'
_computing_molecular_graphics   'SHELXTL'
_computing_publication_material 'SHELXTL'
 
_refine_special_details 
; 
 Refinement of F^2^ against ALL reflections.  The weighted R-factor wR and 
 goodness of fit S are based on F^2^, conventional R-factors R are based 
 on F, with F set to zero for negative F^2^. The threshold expression of 
 F^2^ > 2sigma(F^2^) is used only for calculating R-factors(gt) etc. and is 
 not relevant to the choice of reflections for refinement.  R-factors based 
 on F^2^ are statistically about twice as large as those based on F, and R- 
 factors based on ALL data will be even larger. 
; 
 
_refine_ls_structure_factor_coef  Fsqd  
_refine_ls_matrix_type            full 
_refine_ls_weighting_scheme       calc  
_refine_ls_weighting_details 
 'calc w=1/[\s^2^(Fo^2^)+(0.05P)^2^+1.66P] where P=(Fo^2^+2Fc^2^)/3' 
_atom_sites_solution_primary      direct 
_atom_sites_solution_secondary    difmap 
_atom_sites_solution_hydrogens    geom 
_refine_ls_hydrogen_treatment     constr
_refine_ls_extinction_method      none 
_refine_ls_extinction_coef        ? 
_refine_ls_number_reflns          12426 
_refine_ls_number_parameters      569 
_refine_ls_number_restraints      0 
_refine_ls_R_factor_all           0.0774 
_refine_ls_R_factor_gt            0.0509 
_refine_ls_wR_factor_ref          0.1024 
_refine_ls_wR_factor_gt           0.0970 
_refine_ls_goodness_of_fit_ref    1.042 
_refine_ls_restrained_S_all       1.042 
_refine_ls_shift/su_max           0.000 
_refine_ls_shift/su_mean          0.000 
 
loop_ 
 _atom_site_label 
 _atom_site_type_symbol 
 _atom_site_fract_x 
 _atom_site_fract_y 
 _atom_site_fract_z 
 _atom_site_U_iso_or_equiv 
 _atom_site_adp_type 
 _atom_site_occupancy 
 _atom_site_symmetry_multiplicity 
 _atom_site_calc_flag 
 _atom_site_refinement_flags 
 _atom_site_disorder_assembly 
 _atom_site_disorder_group 
C1 C 0.13903(16) 0.7844(2) 0.10996(13) 0.0404(9) Uani 1 1 d . . . 
C2 C 0.10120(15) 0.8059(2) 0.13889(13) 0.0399(9) Uani 1 1 d . . . 
C3 C 0.11761(16) 0.7958(2) 0.18993(13) 0.0406(9) Uani 1 1 d . . . 
H3 H 0.1509 0.7847 0.2034 0.049 Uiso 1 1 calc R . . 
C4 C 0.08293(16) 0.8027(2) 0.21978(12) 0.0391(9) Uani 1 1 d . . . 
H4 H 0.0937 0.8006 0.2535 0.047 Uiso 1 1 calc R . . 
C5 C 0.03270(17) 0.8127(2) 0.19905(14) 0.0456(9) Uani 1 1 d . . . 
C6 C 0.01552(16) 0.8159(2) 0.14755(14) 0.0427(9) Uani 1 1 d . . . 
H6 H -0.0180 0.8242 0.1335 0.051 Uiso 1 1 calc R . . 
C7 C 0.05034(15) 0.8062(2) 0.11917(14) 0.0403(9) Uani 1 1 d . . . 
H7 H 0.0393 0.7996 0.0857 0.048 Uiso 1 1 calc R . . 
C8 C 0.17245(14) 0.75140(18) -0.07698(13) 0.0327(7) Uani 1 1 d . . . 
C9 C 0.13410(15) 0.7527(2) -0.12306(14) 0.0387(8) Uani 1 1 d . . . 
C10 C 0.08471(15) 0.7519(2) -0.12041(13) 0.0371(8) Uani 1 1 d . . . 
H10 H 0.0765 0.7512 -0.0900 0.045 Uiso 1 1 calc R . . 
C11 C 0.04732(17) 0.7520(2) -0.16129(14) 0.0455(10) Uani 1 1 d . . . 
H11 H 0.0140 0.7517 -0.1591 0.055 Uiso 1 1 calc R . . 
C12 C 0.06016(17) 0.7526(2) -0.20473(15) 0.0450(9) Uani 1 1 d . . . 
C13 C 0.10906(16) 0.7510(2) -0.21131(13) 0.0413(9) Uani 1 1 d . . . 
H13 H 0.1161 0.7499 -0.2422 0.050 Uiso 1 1 calc R . . 
C14 C 0.14753(15) 0.7513(2) -0.16853(13) 0.0368(8) Uani 1 1 d . . . 
H14 H 0.1809 0.7505 -0.1705 0.044 Uiso 1 1 calc R . . 
C15 C 0.26780(15) 0.6029(2) -0.01912(13) 0.0399(9) Uani 1 1 d . . . 
C16 C 0.25912(14) 0.5182(2) -0.01256(13) 0.0357(8) Uani 1 1 d . . . 
C17 C 0.28542(15) 0.4643(2) -0.03603(13) 0.0408(9) Uani 1 1 d . . . 
H17 H 0.3061 0.4822 -0.0560 0.049 Uiso 1 1 calc R . . 
C18 C 0.27969(17) 0.3849(2) -0.02854(15) 0.0499(10) Uani 1 1 d . . . 
H18 H 0.2978 0.3486 -0.0426 0.060 Uiso 1 1 calc R . . 
C19 C 0.24588(14) 0.3563(2) 0.00089(13) 0.0360(8) Uani 1 1 d . . . 
C20 C 0.22028(16) 0.4090(2) 0.02099(14) 0.0449(10) Uani 1 1 d . . . 
H20 H 0.1980 0.3905 0.0391 0.054 Uiso 1 1 calc R . . 
C21 C 0.22532(13) 0.4897(2) 0.01621(12) 0.0327(7) Uani 1 1 d . . . 
H21 H 0.2073 0.5249 0.0312 0.039 Uiso 1 1 calc R . . 
C22 C 0.20127(16) 0.4964(2) 0.13314(14) 0.0439(9) Uani 1 1 d . . . 
H22B H 0.1728 0.4787 0.1093 0.053 Uiso 1 1 calc R . . 
H22C H 0.2022 0.4694 0.1633 0.053 Uiso 1 1 calc R . . 
H22A H 0.2312 0.4851 0.1220 0.053 Uiso 1 1 calc R . . 
C23 C 0.23639(15) 0.6276(2) 0.19902(14) 0.0443(9) Uani 1 1 d . . . 
H23A H 0.2558 0.5827 0.2130 0.066 Uiso 1 1 calc R . . 
H23B H 0.2163 0.6456 0.2209 0.066 Uiso 1 1 calc R . . 
H23C H 0.2583 0.6695 0.1937 0.066 Uiso 1 1 calc R . . 
C24 C 0.05280(14) 0.5948(2) 0.04719(13) 0.0389(8) Uani 1 1 d . . . 
H24A H 0.0480 0.5385 0.0438 0.058 Uiso 1 1 calc R . . 
H24B H 0.0209 0.6207 0.0420 0.058 Uiso 1 1 calc R . . 
H24C H 0.0715 0.6066 0.0794 0.058 Uiso 1 1 calc R . . 
C25 C 0.08606(15) 0.54640(19) -0.04022(12) 0.0355(8) Uani 1 1 d . . . 
H25A H 0.0883 0.5656 -0.0718 0.053 Uiso 1 1 calc R . . 
H25B H 0.0553 0.5178 -0.0427 0.053 Uiso 1 1 calc R . . 
H25C H 0.1137 0.5118 -0.0280 0.053 Uiso 1 1 calc R . . 
C26 C 0.30769(17) 0.4108(3) 0.22445(16) 0.0536(11) Uani 1 1 d . . . 
H26A H 0.3234 0.4552 0.2429 0.064 Uiso 1 1 calc R . . 
H26C H 0.3045 0.4211 0.1903 0.064 Uiso 1 1 calc R . . 
H26B H 0.3277 0.3642 0.2334 0.064 Uiso 1 1 calc R . . 
C27 C 0.23255(17) 0.2954(3) 0.24733(14) 0.0504(11) Uani 1 1 d . . . 
H27A H 0.2288 0.2684 0.2167 0.060 Uiso 1 1 calc R . . 
H27C H 0.2039 0.2852 0.2608 0.060 Uiso 1 1 calc R . . 
H27B H 0.2620 0.2765 0.2693 0.060 Uiso 1 1 calc R . . 
C28 C 0.60978(17) 0.0895(3) 0.66939(14) 0.0520(11) Uani 1 1 d . . . 
H28A H 0.6177 0.0434 0.6525 0.078 Uiso 1 1 calc R . . 
H28B H 0.6401 0.1144 0.6861 0.078 Uiso 1 1 calc R . . 
H28C H 0.5909 0.1260 0.6464 0.078 Uiso 1 1 calc R . . 
C29 C 0.50030(17) 0.0656(3) 0.69086(16) 0.0571(12) Uani 1 1 d . . . 
H29A H 0.4862 0.1019 0.7105 0.068 Uiso 1 1 calc R . . 
H29C H 0.4857 0.0141 0.6920 0.068 Uiso 1 1 calc R . . 
H29B H 0.4937 0.0840 0.6578 0.068 Uiso 1 1 calc R . . 
C30 C 0.38562(17) 0.5870(3) 0.37536(15) 0.0522(11) Uani 1 1 d . . . 
H30A H 0.3504 0.5766 0.3668 0.078 Uiso 1 1 calc R . . 
H30B H 0.3913 0.6429 0.3731 0.078 Uiso 1 1 calc R . . 
H30C H 0.3987 0.5695 0.4081 0.078 Uiso 1 1 calc R . . 
C31 C 0.49302(16) 0.5602(3) 0.33626(15) 0.0556(12) Uani 1 1 d . . . 
H31A H 0.5074 0.5231 0.3174 0.083 Uiso 1 1 calc R . . 
H31B H 0.5108 0.5580 0.3696 0.083 Uiso 1 1 calc R . . 
H31C H 0.4953 0.6127 0.3238 0.083 Uiso 1 1 calc R . . 
Ce1 Ce 0.201083(8) 0.732300(11) 0.046104(6) 0.03102(7) Uani 1 1 d . . . 
N1 N -0.00523(14) 0.8148(2) 0.22509(12) 0.0500(9) Uani 1 1 d . . . 
N2 N 0.02496(13) 0.7490(2) -0.24918(13) 0.0472(8) Uani 1 1 d . . . 
N3 N 0.23547(12) 0.27989(16) 0.00526(11) 0.0383(7) Uani 1 1 d . . . 
O1 O 0.18378(10) 0.77446(14) 0.12603(9) 0.0367(6) Uani 1 1 d . . . 
O2 O 0.11996(10) 0.77642(15) 0.06344(9) 0.0426(6) Uani 1 1 d . . . 
O3 O 0.16145(10) 0.75390(14) -0.03519(8) 0.0366(6) Uani 1 1 d . . . 
O4 O 0.21640(10) 0.74712(12) -0.08620(9) 0.0335(5) Uani 1 1 d . . . 
O5 O 0.24678(9) 0.64972(14) 0.00286(9) 0.0386(6) Uani 1 1 d . . . 
O6 O 0.29780(9) 0.62284(13) -0.04606(7) 0.0311(5) Uani 1 1 d . . . 
O7 O 0.22312(9) 0.62727(13) 0.10245(8) 0.0337(5) Uani 1 1 d . . . 
O8 O 0.14023(9) 0.62724(14) 0.02634(9) 0.0366(5) Uani 1 1 d . . . 
O9 O 0.23338(11) 0.42973(16) 0.28823(10) 0.0526(8) Uani 1 1 d . . . 
O10 O 0.57869(10) -0.02585(15) 0.72111(8) 0.0393(6) Uani 1 1 d . . . 
O11 O 0.38568(11) 0.56396(16) 0.28527(9) 0.0482(7) Uani 1 1 d . . . 
O12 O 0.3988(3) 0.1177(4) 0.1627(3) 0.0504(18) Uani 0.40 1 d P . . 
H12D H 0.3821 0.1607 0.1592 0.061 Uiso 0.40 1 d PR . . 
H12A H 0.3940 0.0933 0.1880 0.061 Uiso 0.40 1 d PR . . 
O13 O 0.4356(3) 0.1400(4) 0.1145(2) 0.0510(18) Uani 0.40 1 d P . . 
H13B H 0.4270 0.1608 0.0863 0.061 Uiso 0.40 1 d PR . . 
H13C H 0.4485 0.1753 0.1350 0.061 Uiso 0.40 1 d PR . . 
O14 O 0.1409(3) 0.7485(4) 0.4291(3) 0.059(2) Uani 0.40 1 d P . . 
H14C H 0.1501 0.7877 0.4138 0.071 Uiso 0.40 1 d PR . . 
H14D H 0.1104 0.7383 0.4175 0.071 Uiso 0.40 1 d PR . . 
O15 O 0.1756(3) 0.5677(4) 0.8953(3) 0.0555(19) Uani 0.40 1 d P . . 
H15B H 0.1681 0.5493 0.9212 0.067 Uiso 0.40 1 d PR . . 
H15C H 0.1499 0.5673 0.8723 0.067 Uiso 0.40 1 d PR . . 
O16 O 0.4884(3) 0.3889(4) 0.4886(2) 0.0533(19) Uani 0.40 1 d P . . 
H16A H 0.5160 0.3694 0.4849 0.064 Uiso 0.40 1 d PR . . 
H16B H 0.4924 0.4117 0.5163 0.064 Uiso 0.40 1 d PR . . 
O17 O 0.6366(3) 0.5522(4) 0.8583(3) 0.0535(18) Uani 0.40 1 d P . . 
H17C H 0.6449 0.5106 0.8753 0.064 Uiso 0.40 1 d PR . . 
H17E H 0.6146 0.5775 0.8696 0.064 Uiso 0.40 1 d PR . . 
O18 O 0.2274(3) 0.3645(4) 0.8164(2) 0.0522(19) Uani 0.40 1 d P . . 
H18B H 0.2188 0.3681 0.8440 0.063 Uiso 0.40 1 d PR . . 
H18C H 0.2089 0.3946 0.7959 0.063 Uiso 0.40 1 d PR . . 
O19 O 0.2448(4) 0.2422(6) 0.8622(3) 0.057(3) Uani 0.30 1 d P . . 
H19A H 0.2172 0.2193 0.8626 0.068 Uiso 0.30 1 d PR . . 
H19C H 0.2603 0.2510 0.8914 0.068 Uiso 0.30 1 d PR . . 
O20 O 0.0722(3) 0.0288(5) 0.4743(3) 0.045(2) Uani 0.30 1 d P . . 
H20B H 0.0707 -0.0216 0.4739 0.055 Uiso 0.30 1 d PR . . 
H20C H 0.0429 0.0478 0.4657 0.055 Uiso 0.30 1 d PR . . 
O21 O 0.4085(3) 0.8198(5) 0.4491(3) 0.040(2) Uani 0.30 1 d P . . 
H21D H 0.3871 0.8169 0.4223 0.048 Uiso 0.30 1 d PR . . 
H21A H 0.3942 0.8350 0.4718 0.048 Uiso 0.30 1 d PR . . 
O22 O 0.4531(4) 0.7200(5) 0.4504(4) 0.053(3) Uani 0.30 1 d P . . 
H22D H 0.4752 0.7204 0.4768 0.064 Uiso 0.30 1 d PR . . 
H22E H 0.4350 0.6789 0.4497 0.064 Uiso 0.30 1 d PR . . 
S1 S 0.19673(4) 0.59967(5) 0.14198(3) 0.0361(2) Uani 1 1 d . . . 
S2 S 0.08762(3) 0.63056(5) 0.00148(3) 0.03462(19) Uani 1 1 d . . . 
S3 S 0.23765(4) 0.39321(6) 0.23883(4) 0.0481(3) Uani 1 1 d . . . 
S4 S 0.57123(4) 0.05899(6) 0.71547(4) 0.0467(3) Uani 1 1 d . . . 
S5 S 0.41817(4) 0.53140(5) 0.33191(3) 0.0371(2) Uani 1 1 d . . . 
 
loop_ 
 _atom_site_aniso_label 
 _atom_site_aniso_U_11 
 _atom_site_aniso_U_22 
 _atom_site_aniso_U_33 
 _atom_site_aniso_U_23 
 _atom_site_aniso_U_13 
 _atom_site_aniso_U_12 
C1 0.043(2) 0.042(2) 0.0366(19) -0.0083(15) 0.0097(17) -0.0026(17) 
C2 0.051(3) 0.0279(18) 0.043(2) 0.0021(15) 0.0156(18) 0.0221(16) 
C3 0.048(2) 0.0381(18) 0.0394(19) -0.0003(16) 0.0181(18) -0.0186(18) 
C4 0.051(2) 0.0392(19) 0.0295(17) 0.0086(14) 0.0140(16) 0.0086(17) 
C5 0.047(2) 0.046(2) 0.047(2) 0.0040(17) 0.0173(19) -0.0001(18) 
C6 0.045(2) 0.0397(19) 0.044(2) 0.0056(17) 0.0109(18) 0.0145(17) 
C7 0.043(2) 0.038(2) 0.043(2) -0.0175(16) 0.0160(18) -0.0173(16) 
C8 0.042(2) 0.0181(14) 0.0389(18) -0.0038(13) 0.0114(16) 0.0001(14) 
C9 0.039(2) 0.0364(17) 0.0378(19) -0.0036(15) 0.0028(16) -0.0012(16) 
C10 0.042(2) 0.0407(19) 0.0301(17) 0.0064(15) 0.0103(15) 0.0052(17) 
C11 0.045(2) 0.041(2) 0.045(2) 0.0172(17) -0.0029(18) -0.0090(18) 
C12 0.053(3) 0.0369(19) 0.043(2) 0.0117(16) 0.0050(19) 0.0005(18) 
C13 0.053(3) 0.0363(19) 0.0304(17) 0.0046(14) -0.0010(17) -0.0097(18) 
C14 0.036(2) 0.0302(17) 0.0357(18) 0.0054(14) -0.0115(15) -0.0003(15) 
C15 0.043(2) 0.041(2) 0.0387(19) -0.0054(16) 0.0165(17) -0.0078(17) 
C16 0.035(2) 0.0367(18) 0.0401(18) 0.0010(15) 0.0178(16) -0.0042(15) 
C17 0.042(2) 0.051(2) 0.0335(17) -0.0008(16) 0.0152(17) -0.0023(18) 
C18 0.057(3) 0.044(2) 0.051(2) -0.0008(18) 0.014(2) 0.0019(19) 
C19 0.034(2) 0.0334(18) 0.0399(18) -0.0062(15) 0.0070(16) -0.0050(15) 
C20 0.051(2) 0.039(2) 0.055(2) -0.0251(18) 0.035(2) -0.0192(18) 
C21 0.0227(17) 0.045(2) 0.0318(16) -0.0017(15) 0.0087(14) -0.0006(14) 
C22 0.051(3) 0.0276(18) 0.048(2) 0.0077(16) -0.0019(18) -0.0059(16) 
C23 0.048(2) 0.044(2) 0.044(2) -0.0091(17) 0.0169(18) -0.0072(18) 
C24 0.035(2) 0.0315(17) 0.050(2) 0.0164(16) 0.0070(17) -0.0004(15) 
C25 0.048(2) 0.0281(16) 0.0319(17) 0.0018(14) 0.0128(16) 0.0036(16) 
C26 0.054(3) 0.055(2) 0.055(2) 0.003(2) 0.018(2) 0.019(2) 
C27 0.056(3) 0.058(2) 0.044(2) -0.0192(19) 0.027(2) 0.016(2) 
C28 0.057(3) 0.057(2) 0.043(2) 0.0136(19) 0.012(2) -0.012(2) 
C29 0.049(3) 0.060(3) 0.054(2) -0.014(2) -0.006(2) 0.006(2) 
C30 0.057(3) 0.056(2) 0.049(2) -0.0077(19) 0.024(2) 0.036(2) 
C31 0.043(2) 0.069(3) 0.051(2) -0.020(2) 0.0014(19) 0.028(2) 
Ce1 0.03294(12) 0.03299(11) 0.02679(10) -0.00332(7) 0.00572(8) -0.01119(8) 
N1 0.054(2) 0.049(2) 0.0549(19) -0.0062(15) 0.0290(19) -0.0011(16) 
N2 0.0432(19) 0.0515(18) 0.0467(18) 0.0089(15) 0.0089(16) -0.0093(15) 
N3 0.0338(18) 0.0329(16) 0.0427(17) -0.0140(13) -0.0039(14) 0.0017(12) 
O1 0.0351(15) 0.0383(13) 0.0388(13) -0.0065(10) 0.0127(11) -0.0114(11) 
O2 0.0361(15) 0.0497(15) 0.0424(14) 0.0096(11) 0.0095(12) -0.0038(11) 
O3 0.0420(15) 0.0340(12) 0.0326(12) -0.0030(10) 0.0052(11) -0.0108(11) 
O4 0.0402(15) 0.0196(10) 0.0393(13) -0.0030(9) 0.0057(11) -0.0115(10) 
O5 0.0369(15) 0.0342(12) 0.0439(14) 0.0039(11) 0.0073(12) 0.0072(11) 
O6 0.0351(14) 0.0304(12) 0.0285(11) -0.0034(9) 0.0086(10) -0.0116(10) 
O7 0.0434(15) 0.0302(12) 0.0277(11) -0.0075(9) 0.0078(10) -0.0145(10) 
O8 0.0267(13) 0.0425(13) 0.0418(13) -0.0009(11) 0.0103(11) -0.0091(11) 
O9 0.0458(17) 0.0515(16) 0.0458(15) 0.0269(13) -0.0226(13) -0.0054(13) 
O10 0.0417(15) 0.0462(14) 0.0269(11) 0.0033(10) 0.0005(11) 0.0066(12) 
O11 0.0511(18) 0.0532(16) 0.0401(14) -0.0044(12) 0.0094(13) 0.0137(13) 
O12 0.047(4) 0.042(4) 0.064(4) -0.009(3) 0.014(3) 0.030(3) 
O13 0.070(5) 0.055(4) 0.026(3) 0.002(3) 0.007(3) -0.024(4) 
O14 0.083(6) 0.051(4) 0.043(4) 0.020(3) 0.016(4) 0.011(4) 
O15 0.045(4) 0.031(3) 0.088(5) -0.009(3) 0.010(4) 0.004(3) 
O16 0.040(4) 0.066(5) 0.045(4) -0.003(3) -0.011(3) 0.011(3) 
O17 0.065(5) 0.034(3) 0.059(4) 0.011(3) 0.007(4) -0.001(3) 
O18 0.053(5) 0.067(5) 0.034(3) -0.002(3) 0.003(3) 0.031(4) 
O19 0.040(6) 0.062(6) 0.051(5) -0.020(5) -0.028(5) 0.014(5) 
O20 0.047(5) 0.052(5) 0.044(5) -0.032(4) 0.027(4) -0.002(4) 
O21 0.025(5) 0.056(5) 0.036(4) -0.012(4) 0.001(4) -0.014(4) 
O22 0.049(6) 0.050(5) 0.059(6) 0.036(5) 0.010(5) 0.000(4) 
S1 0.0456(6) 0.0269(4) 0.0389(5) -0.0078(3) 0.0157(4) -0.0003(4) 
S2 0.0281(4) 0.0345(4) 0.0453(5) -0.0108(4) 0.0169(4) -0.0089(3) 
S3 0.0486(6) 0.0519(6) 0.0450(5) -0.0238(4) 0.0130(5) 0.0150(5) 
S4 0.0541(6) 0.0357(5) 0.0418(5) 0.0133(4) -0.0081(5) -0.0005(4) 
S5 0.0334(5) 0.0458(5) 0.0378(4) 0.0085(4) 0.0206(4) 0.0160(4) 
 
_geom_special_details 
; 
 All esds (except the esd in the dihedral angle between two l.s. planes) 
 are estimated using the full covariance matrix.  The cell esds are taken 
 into account individually in the estimation of esds in distances, angles 
 and torsion angles; correlations between esds in cell parameters are only 
 used when they are defined by crystal symmetry.  An approximate (isotropic) 
 treatment of cell esds is used for estimating esds involving l.s. planes. 
; 
 
loop_ 
 _geom_bond_atom_site_label_1 
 _geom_bond_atom_site_label_2 
 _geom_bond_distance 
 _geom_bond_site_symmetry_2 
 _geom_bond_publ_flag 
C1 O1 1.225(5) . ? 
C1 O2 1.307(4) . ? 
C1 C2 1.496(5) . ? 
C1 Ce1 2.867(4) . ? 
C2 C7 1.386(5) . ? 
C2 C3 1.419(5) . ? 
C3 C4 1.403(5) . ? 
C3 H3 0.9300 . ? 
C4 C5 1.386(6) . ? 
C4 H4 0.9300 . ? 
C5 N1 1.396(5) . ? 
C5 C6 1.424(5) . ? 
C6 C7 1.380(6) . ? 
C6 H6 0.9300 . ? 
C7 H7 0.9300 . ? 
C8 O3 1.276(4) . ? 
C8 O4 1.289(5) . ? 
C8 C9 1.483(5) . ? 
C9 C10 1.373(6) . ? 
C9 C14 1.406(6) . ? 
C10 C11 1.365(5) . ? 
C10 H10 0.9300 . ? 
C11 C12 1.343(6) . ? 
C11 H11 0.9300 . ? 
C12 C13 1.394(6) . ? 
C12 N2 1.406(5) . ? 
C13 C14 1.419(5) . ? 
C13 H13 0.9300 . ? 
C14 H14 0.9300 . ? 
C15 O5 1.222(4) . ? 
C15 O6 1.279(4) . ? 
C15 C16 1.467(5) . ? 
C15 Ce1 3.053(4) 7_565 ? 
C16 C17 1.410(5) . ? 
C16 C21 1.439(5) . ? 
C17 C18 1.371(6) . ? 
C17 H17 0.9300 . ? 
C18 C19 1.452(6) . ? 
C18 H18 0.9300 . ? 
C19 C20 1.332(5) . ? 
C19 N3 1.332(5) . ? 
C20 C21 1.378(5) . ? 
C20 H20 0.9300 . ? 
C21 H21 0.9300 . ? 
C22 S1 1.768(4) . ? 
C22 H22B 0.9600 . ? 
C22 H22C 0.9600 . ? 
C22 H22A 0.9600 . ? 
C23 S1 1.796(4) . ? 
C23 H23A 0.9600 . ? 
C23 H23B 0.9600 . ? 
C23 H23C 0.9600 . ? 
C24 S2 1.860(4) . ? 
C24 H24A 0.9600 . ? 
C24 H24B 0.9600 . ? 
C24 H24C 0.9600 . ? 
C25 S2 1.836(3) . ? 
C25 H25A 0.9600 . ? 
C25 H25B 0.9600 . ? 
C25 H25C 0.9600 . ? 
C26 S3 2.069(5) . ? 
C26 H26A 0.9600 . ? 
C26 H26C 0.9600 . ? 
C26 H26B 0.9600 . ? 
C27 S3 1.678(5) . ? 
C27 H27A 0.9600 . ? 
C27 H27C 0.9600 . ? 
C27 H27B 0.9600 . ? 
C28 S4 1.912(4) . ? 
C28 H28A 0.9600 . ? 
C28 H28B 0.9600 . ? 
C28 H28C 0.9600 . ? 
C29 S4 1.922(5) . ? 
C29 H29A 0.9600 . ? 
C29 H29C 0.9600 . ? 
C29 H29B 0.9600 . ? 
C30 S5 1.908(3) . ? 
C30 H30A 0.9600 . ? 
C30 H30B 0.9600 . ? 
C30 H30C 0.9600 . ? 
C31 S5 2.088(5) . ? 
C31 H31A 0.9600 . ? 
C31 H31B 0.9600 . ? 
C31 H31C 0.9600 . ? 
Ce1 O4 2.327(2) 7_565 ? 
Ce1 O3 2.339(2) . ? 
Ce1 O7 2.367(2) . ? 
Ce1 O5 2.377(2) . ? 
Ce1 O8 2.416(2) . ? 
Ce1 O6 2.444(2) 7_565 ? 
Ce1 O2 2.493(3) . ? 
Ce1 O1 2.499(2) . ? 
Ce1 O5 2.959(2) 7_565 ? 
Ce1 C15 3.053(4) 7_565 ? 
Ce1 Ce1 4.1590(6) 7_565 ? 
N1 N1 1.369(7) 2 ? 
N2 N2 1.360(7) 2_554 ? 
N3 N3 1.358(6) 7 ? 
O4 Ce1 2.327(2) 7_565 ? 
O5 Ce1 2.959(2) 7_565 ? 
O6 Ce1 2.444(2) 7_565 ? 
O7 S1 1.525(2) . ? 
O8 S2 1.463(2) . ? 
O9 S3 1.547(3) . ? 
O10 S4 1.450(3) . ? 
O11 S5 1.520(3) . ? 
O12 H12D 0.8516 . ? 
O12 H12A 0.8565 . ? 
O13 H13B 0.8535 . ? 
O13 H13C 0.8513 . ? 
O14 H14C 0.8547 . ? 
O14 H14D 0.8492 . ? 
O15 H15B 0.8573 . ? 
O15 H15C 0.8486 . ? 
O16 H16A 0.8532 . ? 
O16 H16B 0.8543 . ? 
O17 H17C 0.8519 . ? 
O17 H17E 0.8553 . ? 
O18 H18B 0.8583 . ? 
O18 H18C 0.8503 . ? 
O19 H19A 0.8521 . ? 
O19 H19C 0.8516 . ? 
O20 H20B 0.8522 . ? 
O20 H20C 0.8498 . ? 
O21 H21D 0.8498 . ? 
O21 H21A 0.8579 . ? 
O22 H22D 0.8495 . ? 
O22 H22E 0.8521 . ? 
 
loop_ 
 _geom_angle_atom_site_label_1 
 _geom_angle_atom_site_label_2 
 _geom_angle_atom_site_label_3 
 _geom_angle 
 _geom_angle_site_symmetry_1 
 _geom_angle_site_symmetry_3 
 _geom_angle_publ_flag 
O1 C1 O2 120.5(4) . . ? 
O1 C1 C2 126.2(3) . . ? 
O2 C1 C2 113.3(3) . . ? 
O1 C1 Ce1 60.4(2) . . ? 
O2 C1 Ce1 60.32(19) . . ? 
C2 C1 Ce1 172.5(3) . . ? 
C7 C2 C3 118.5(4) . . ? 
C7 C2 C1 122.7(3) . . ? 
C3 C2 C1 114.6(3) . . ? 
C4 C3 C2 119.2(4) . . ? 
C4 C3 H3 120.4 . . ? 
C2 C3 H3 120.4 . . ? 
C5 C4 C3 120.0(3) . . ? 
C5 C4 H4 120.0 . . ? 
C3 C4 H4 120.0 . . ? 
C4 C5 N1 124.6(4) . . ? 
C4 C5 C6 120.8(4) . . ? 
N1 C5 C6 114.4(4) . . ? 
C7 C6 C5 117.8(4) . . ? 
C7 C6 H6 121.1 . . ? 
C5 C6 H6 121.1 . . ? 
C6 C7 C2 122.1(4) . . ? 
C6 C7 H7 118.9 . . ? 
C2 C7 H7 118.9 . . ? 
O3 C8 O4 127.2(3) . . ? 
O3 C8 C9 122.7(4) . . ? 
O4 C8 C9 110.1(3) . . ? 
C10 C9 C14 120.3(3) . . ? 
C10 C9 C8 118.3(3) . . ? 
C14 C9 C8 121.3(4) . . ? 
C11 C10 C9 121.7(4) . . ? 
C11 C10 H10 119.2 . . ? 
C9 C10 H10 119.2 . . ? 
C12 C11 C10 118.0(4) . . ? 
C12 C11 H11 121.0 . . ? 
C10 C11 H11 121.0 . . ? 
C11 C12 C13 124.8(4) . . ? 
C11 C12 N2 123.0(4) . . ? 
C13 C12 N2 112.1(4) . . ? 
C12 C13 C14 116.6(4) . . ? 
C12 C13 H13 121.7 . . ? 
C14 C13 H13 121.7 . . ? 
C9 C14 C13 118.6(4) . . ? 
C9 C14 H14 120.7 . . ? 
C13 C14 H14 120.7 . . ? 
O5 C15 O6 124.3(3) . . ? 
O5 C15 C16 117.3(3) . . ? 
O6 C15 C16 118.3(3) . . ? 
O5 C15 Ce1 74.0(2) . 7_565 ? 
O6 C15 Ce1 50.36(17) . 7_565 ? 
C16 C15 Ce1 168.7(3) . 7_565 ? 
C17 C16 C21 120.4(3) . . ? 
C17 C16 C15 117.1(3) . . ? 
C21 C16 C15 122.5(3) . . ? 
C18 C17 C16 118.1(4) . . ? 
C18 C17 H17 121.0 . . ? 
C16 C17 H17 121.0 . . ? 
C17 C18 C19 121.4(4) . . ? 
C17 C18 H18 119.3 . . ? 
C19 C18 H18 119.3 . . ? 
C20 C19 N3 117.6(4) . . ? 
C20 C19 C18 118.7(3) . . ? 
N3 C19 C18 123.4(3) . . ? 
C19 C20 C21 123.0(4) . . ? 
C19 C20 H20 118.5 . . ? 
C21 C20 H20 118.5 . . ? 
C20 C21 C16 118.4(3) . . ? 
C20 C21 H21 120.8 . . ? 
C16 C21 H21 120.8 . . ? 
S1 C22 H22B 109.5 . . ? 
S1 C22 H22C 109.5 . . ? 
H22B C22 H22C 109.5 . . ? 
S1 C22 H22A 109.5 . . ? 
H22B C22 H22A 109.5 . . ? 
H22C C22 H22A 109.5 . . ? 
S1 C23 H23A 109.5 . . ? 
S1 C23 H23B 109.5 . . ? 
H23A C23 H23B 109.5 . . ? 
S1 C23 H23C 109.5 . . ? 
H23A C23 H23C 109.5 . . ? 
H23B C23 H23C 109.5 . . ? 
S2 C24 H24A 109.5 . . ? 
S2 C24 H24B 109.5 . . ? 
H24A C24 H24B 109.5 . . ? 
S2 C24 H24C 109.5 . . ? 
H24A C24 H24C 109.5 . . ? 
H24B C24 H24C 109.5 . . ? 
S2 C25 H25A 109.5 . . ? 
S2 C25 H25B 109.5 . . ? 
H25A C25 H25B 109.5 . . ? 
S2 C25 H25C 109.5 . . ? 
H25A C25 H25C 109.5 . . ? 
H25B C25 H25C 109.5 . . ? 
S3 C26 H26A 109.5 . . ? 
S3 C26 H26C 109.5 . . ? 
H26A C26 H26C 109.5 . . ? 
S3 C26 H26B 109.5 . . ? 
H26A C26 H26B 109.5 . . ? 
H26C C26 H26B 109.5 . . ? 
S3 C27 H27A 109.5 . . ? 
S3 C27 H27C 109.5 . . ? 
H27A C27 H27C 109.5 . . ? 
S3 C27 H27B 109.5 . . ? 
H27A C27 H27B 109.5 . . ? 
H27C C27 H27B 109.5 . . ? 
S4 C28 H28A 109.5 . . ? 
S4 C28 H28B 109.5 . . ? 
H28A C28 H28B 109.5 . . ? 
S4 C28 H28C 109.5 . . ? 
H28A C28 H28C 109.5 . . ? 
H28B C28 H28C 109.5 . . ? 
S4 C29 H29A 109.5 . . ? 
S4 C29 H29C 109.5 . . ? 
H29A C29 H29C 109.5 . . ? 
S4 C29 H29B 109.5 . . ? 
H29A C29 H29B 109.5 . . ? 
H29C C29 H29B 109.5 . . ? 
S5 C30 H30A 109.5 . . ? 
S5 C30 H30B 109.5 . . ? 
H30A C30 H30B 109.5 . . ? 
S5 C30 H30C 109.5 . . ? 
H30A C30 H30C 109.5 . . ? 
H30B C30 H30C 109.5 . . ? 
S5 C31 H31A 109.5 . . ? 
S5 C31 H31B 109.5 . . ? 
H31A C31 H31B 109.5 . . ? 
S5 C31 H31C 109.5 . . ? 
H31A C31 H31C 109.5 . . ? 
H31B C31 H31C 109.5 . . ? 
O4 Ce1 O3 130.45(9) 7_565 . ? 
O4 Ce1 O7 72.92(8) 7_565 . ? 
O3 Ce1 O7 140.25(7) . . ? 
O4 Ce1 O5 76.70(8) 7_565 . ? 
O3 Ce1 O5 77.06(9) . . ? 
O7 Ce1 O5 79.47(8) . . ? 
O4 Ce1 O8 140.58(8) 7_565 . ? 
O3 Ce1 O8 74.76(8) . . ? 
O7 Ce1 O8 70.65(8) . . ? 
O5 Ce1 O8 82.35(8) . . ? 
O4 Ce1 O6 80.80(7) 7_565 7_565 ? 
O3 Ce1 O6 81.20(7) . 7_565 ? 
O7 Ce1 O6 138.37(7) . 7_565 ? 
O5 Ce1 O6 125.29(8) . 7_565 ? 
O8 Ce1 O6 137.87(8) . 7_565 ? 
O4 Ce1 O2 132.60(9) 7_565 . ? 
O3 Ce1 O2 84.18(9) . . ? 
O7 Ce1 O2 101.66(8) . . ? 
O5 Ce1 O2 150.10(9) . . ? 
O8 Ce1 O2 70.26(9) . . ? 
O6 Ce1 O2 73.35(8) 7_565 . ? 
O4 Ce1 O1 82.86(9) 7_565 . ? 
O3 Ce1 O1 134.15(9) . . ? 
O7 Ce1 O1 71.42(8) . . ? 
O5 Ce1 O1 148.29(8) . . ? 
O8 Ce1 O1 99.18(8) . . ? 
O6 Ce1 O1 73.78(7) 7_565 . ? 
O2 Ce1 O1 52.26(9) . . ? 
O4 Ce1 C1 107.34(10) 7_565 . ? 
O3 Ce1 C1 110.57(10) . . ? 
O7 Ce1 C1 84.84(10) . . ? 
O5 Ce1 C1 161.88(10) . . ? 
O8 Ce1 C1 83.94(10) . . ? 
O6 Ce1 C1 72.74(9) 7_565 . ? 
O2 Ce1 C1 27.09(10) . . ? 
O1 Ce1 C1 25.21(9) . . ? 
O4 Ce1 O5 66.90(7) 7_565 7_565 ? 
O3 Ce1 O5 67.02(8) . 7_565 ? 
O7 Ce1 O5 137.39(8) . 7_565 ? 
O5 Ce1 O5 78.15(8) . 7_565 ? 
O8 Ce1 O5 139.99(7) . 7_565 ? 
O6 Ce1 O5 47.14(7) 7_565 7_565 ? 
O2 Ce1 O5 115.60(7) . 7_565 ? 
O1 Ce1 O5 115.60(7) . 7_565 ? 
C1 Ce1 O5 119.86(9) . 7_565 ? 
O4 Ce1 C15 71.91(9) 7_565 7_565 ? 
O3 Ce1 C15 73.20(9) . 7_565 ? 
O7 Ce1 C15 143.49(9) . 7_565 ? 
O5 Ce1 C15 101.53(9) . 7_565 ? 
O8 Ce1 C15 145.86(9) . 7_565 ? 
O6 Ce1 C15 23.76(9) 7_565 7_565 ? 
O2 Ce1 C15 94.94(10) . 7_565 ? 
O1 Ce1 C15 94.71(9) . 7_565 ? 
C1 Ce1 C15 96.47(11) . 7_565 ? 
O5 Ce1 C15 23.39(8) 7_565 7_565 ? 
O4 Ce1 Ce1 65.76(6) 7_565 7_565 ? 
O3 Ce1 Ce1 66.06(7) . 7_565 ? 
O7 Ce1 Ce1 114.78(6) . 7_565 ? 
O5 Ce1 Ce1 44.13(6) . 7_565 ? 
O8 Ce1 Ce1 117.96(6) . 7_565 ? 
O6 Ce1 Ce1 81.16(5) 7_565 7_565 ? 
O2 Ce1 Ce1 143.41(6) . 7_565 ? 
O1 Ce1 Ce1 142.53(6) . 7_565 ? 
C1 Ce1 Ce1 153.83(8) . 7_565 ? 
O5 Ce1 Ce1 34.02(5) 7_565 7_565 ? 
C15 Ce1 Ce1 57.40(7) 7_565 7_565 ? 
N1 N1 C5 121.5(5) 2 . ? 
N2 N2 C12 121.5(4) 2_554 . ? 
C19 N3 N3 123.4(4) . 7 ? 
C1 O1 Ce1 94.4(2) . . ? 
C1 O2 Ce1 92.6(2) . . ? 
C8 O3 Ce1 138.0(2) . . ? 
C8 O4 Ce1 138.5(2) . 7_565 ? 
C15 O5 Ce1 175.2(2) . . ? 
C15 O5 Ce1 82.6(2) . 7_565 ? 
Ce1 O5 Ce1 101.85(8) . 7_565 ? 
C15 O6 Ce1 105.9(2) . 7_565 ? 
S1 O7 Ce1 128.61(15) . . ? 
S2 O8 Ce1 130.04(15) . . ? 
H12D O12 H12A 109.2 . . ? 
H13B O13 H13C 109.5 . . ? 
H14C O14 H14D 109.6 . . ? 
H15B O15 H15C 109.5 . . ? 
H16A O16 H16B 110.0 . . ? 
H17C O17 H17E 109.1 . . ? 
H18B O18 H18C 109.5 . . ? 
H19A O19 H19C 108.9 . . ? 
H20B O20 H20C 109.5 . . ? 
H21D O21 H21A 109.7 . . ? 
H22D O22 H22E 109.2 . . ? 
O7 S1 C22 98.01(17) . . ? 
O7 S1 C23 106.25(16) . . ? 
C22 S1 C23 109.69(18) . . ? 
O8 S2 C25 99.22(17) . . ? 
O8 S2 C24 104.97(16) . . ? 
C25 S2 C24 104.23(17) . . ? 
O9 S3 C27 103.83(17) . . ? 
O9 S3 C26 111.85(18) . . ? 
C27 S3 C26 106.2(2) . . ? 
O10 S4 C28 104.72(19) . . ? 
O10 S4 C29 101.82(19) . . ? 
C28 S4 C29 113.9(2) . . ? 
O11 S5 C30 96.13(17) . . ? 
O11 S5 C31 110.63(18) . . ? 
C30 S5 C31 116.01(19) . . ? 
 
_diffrn_measured_fraction_theta_max    0.994 
_diffrn_reflns_theta_full              26.00 
_diffrn_measured_fraction_theta_full   0.994 
_refine_diff_density_max    1.304 
_refine_diff_density_min   -1.083 
_refine_diff_density_rms    0.073 

#===END


data_8Sm
_database_code_depnum_ccdc_archive 'CCDC 745292'
_audit_creation_method           SHELXL-2000
_chemical_name_systematic        
;
?
; 
_chemical_name_common             ? 
_chemical_melting_point           ? 
_chemical_formula_moiety          ? 
_chemical_formula_sum 
 'C31 H50 N3 O15 S5 Sm' 
_chemical_formula_weight          1015.39 
 
loop_ 
 _atom_type_symbol 
 _atom_type_description 
 _atom_type_scat_dispersion_real 
 _atom_type_scat_dispersion_imag 
 _atom_type_scat_source 
 'C'  'C'   0.0033   0.0016 
 'International Tables Vol C Tables 4.2.6.8 and 6.1.1.4' 
 'H'  'H'   0.0000   0.0000 
 'International Tables Vol C Tables 4.2.6.8 and 6.1.1.4' 
 'N'  'N'   0.0061   0.0033 
 'International Tables Vol C Tables 4.2.6.8 and 6.1.1.4' 
 'O'  'O'   0.0106   0.0060 
 'International Tables Vol C Tables 4.2.6.8 and 6.1.1.4' 
 'S'  'S'   0.1246   0.1234 
 'International Tables Vol C Tables 4.2.6.8 and 6.1.1.4' 
 'Sm'  'Sm'  -0.1638   3.4418 
 'International Tables Vol C Tables 4.2.6.8 and 6.1.1.4' 
 
_symmetry_cell_setting           'Monoclinic'
_symmetry_space_group_name_H-M   'C2/c  '
_symmetry_space_group_name_Hall   '-C 2yc' 
 
loop_ 
 _symmetry_equiv_pos_as_xyz 
 'x, y, z' 
 '-x, y, -z+1/2' 
 'x+1/2, y+1/2, z' 
 '-x+1/2, y+1/2, -z+1/2' 
 '-x, -y, -z' 
 'x, -y, z-1/2' 
 '-x+1/2, -y+1/2, -z' 
 'x+1/2, -y+1/2, z-1/2' 
 
_cell_length_a                    27.4670(13) 
_cell_length_b                    16.838(2) 
_cell_length_c                    27.9632(11) 
_cell_angle_alpha                 90.00 
_cell_angle_beta                  101.776(3) 
_cell_angle_gamma                 90.00 
_cell_volume                      12660.4(18) 
_cell_formula_units_Z             8 
_cell_measurement_temperature     291(2) 
_cell_measurement_reflns_used     3102 
_cell_measurement_theta_min       2.15
_cell_measurement_theta_max       27.41
 
_exptl_crystal_description        block 
_exptl_crystal_colour             red  
_exptl_crystal_size_max           0.30 
_exptl_crystal_size_mid           0.24 
_exptl_crystal_size_min           0.22 
_exptl_crystal_density_meas       ? 
_exptl_crystal_density_diffrn     1.065 
_exptl_crystal_density_method     'not measured' 
_exptl_crystal_F_000              4152 
_exptl_absorpt_coefficient_mu     1.137 
_exptl_absorpt_correction_type    'multi-scan' 
_exptl_absorpt_correction_T_min   0.7266 
_exptl_absorpt_correction_T_max   0.7880 
_exptl_absorpt_process_details    'SADABS; Bruker, 2000' 
 
_exptl_special_details 
; 
 ? 
; 
 
_diffrn_ambient_temperature       291(2) 
_diffrn_radiation_wavelength      0.71073 
_diffrn_radiation_type            MoK\a 
_diffrn_radiation_source         'sealed tube'
_diffrn_radiation_monochromator  'graphite'
_diffrn_measurement_device_type  'Bruker Smart Apex CCD'
_diffrn_measurement_method       'phi and omega scans'
_diffrn_detector_area_resol_mean  ? 
_diffrn_standards_number          ? 
_diffrn_standards_interval_count  ? 
_diffrn_standards_interval_time   ? 
_diffrn_standards_decay_%         ? 
_diffrn_reflns_number             40677 
_diffrn_reflns_av_R_equivalents   0.0630 
_diffrn_reflns_av_sigmaI/netI     0.0966 
_diffrn_reflns_limit_h_min        -35 
_diffrn_reflns_limit_h_max        34 
_diffrn_reflns_limit_k_min        -18 
_diffrn_reflns_limit_k_max        21 
_diffrn_reflns_limit_l_min        -31 
_diffrn_reflns_limit_l_max        34 
_diffrn_reflns_theta_min          1.43 
_diffrn_reflns_theta_max          27.00 
_reflns_number_total              13810 
_reflns_number_gt                 9594 
_reflns_threshold_expression      >2sigma(I) 
 
_computing_data_collection      'SMART (Bruker, 2000)'
_computing_cell_refinement      'SMART'
_computing_data_reduction       'SAINT (Bruker, 2000)'
_computing_structure_solution   'SHELXTL (Bruker, 2000)'
_computing_structure_refinement 'SHELXTL'
_computing_molecular_graphics   'SHELXTL'
_computing_publication_material 'SHELXTL'
 
_refine_special_details 
; 
 Refinement of F^2^ against ALL reflections.  The weighted R-factor wR and 
 goodness of fit S are based on F^2^, conventional R-factors R are based 
 on F, with F set to zero for negative F^2^. The threshold expression of 
 F^2^ > 2sigma(F^2^) is used only for calculating R-factors(gt) etc. and is 
 not relevant to the choice of reflections for refinement.  R-factors based 
 on F^2^ are statistically about twice as large as those based on F, and R- 
 factors based on ALL data will be even larger. 
; 
 
_refine_ls_structure_factor_coef  Fsqd  
_refine_ls_matrix_type            full 
_refine_ls_weighting_scheme       calc  
_refine_ls_weighting_details 
 'calc w=1/[\s^2^(Fo^2^)+(0.05P)^2^+1.22P] where P=(Fo^2^+2Fc^2^)/3' 
_atom_sites_solution_primary      direct 
_atom_sites_solution_secondary    difmap 
_atom_sites_solution_hydrogens    geom 
_refine_ls_hydrogen_treatment     constr 
_refine_ls_extinction_method      none 
_refine_ls_extinction_coef        ? 
_refine_ls_number_reflns          13810 
_refine_ls_number_parameters      569 
_refine_ls_number_restraints      0 
_refine_ls_R_factor_all           0.0804 
_refine_ls_R_factor_gt            0.0546 
_refine_ls_wR_factor_ref          0.1113 
_refine_ls_wR_factor_gt           0.1071 
_refine_ls_goodness_of_fit_ref    1.058 
_refine_ls_restrained_S_all       1.058 
_refine_ls_shift/su_max           0.000 
_refine_ls_shift/su_mean          0.000 
 
loop_ 
 _atom_site_label 
 _atom_site_type_symbol 
 _atom_site_fract_x 
 _atom_site_fract_y 
 _atom_site_fract_z 
 _atom_site_U_iso_or_equiv 
 _atom_site_adp_type 
 _atom_site_occupancy 
 _atom_site_symmetry_multiplicity 
 _atom_site_calc_flag 
 _atom_site_refinement_flags 
 _atom_site_disorder_assembly 
 _atom_site_disorder_group 
C1 C 0.13881(17) 0.7841(3) 0.10971(15) 0.0399(10) Uani 1 1 d . . . 
C2 C 0.10120(17) 0.8066(2) 0.13885(15) 0.0380(10) Uani 1 1 d . . . 
C3 C 0.11777(17) 0.7957(2) 0.18965(15) 0.0385(9) Uani 1 1 d . . . 
H3 H 0.1509 0.7841 0.2028 0.046 Uiso 1 1 calc R . . 
C4 C 0.08277(16) 0.8027(2) 0.21991(15) 0.0374(9) Uani 1 1 d . . . 
H4 H 0.0931 0.8007 0.2537 0.045 Uiso 1 1 calc R . . 
C5 C 0.03310(18) 0.8127(3) 0.19912(17) 0.0462(11) Uani 1 1 d . . . 
C6 C 0.01572(18) 0.8153(3) 0.14747(16) 0.0430(10) Uani 1 1 d . . . 
H6 H -0.0178 0.8228 0.1337 0.052 Uiso 1 1 calc R . . 
C7 C 0.05059(16) 0.8064(2) 0.11908(16) 0.0392(9) Uani 1 1 d . . . 
H7 H 0.0400 0.7999 0.0855 0.047 Uiso 1 1 calc R . . 
C8 C 0.17253(16) 0.7514(2) -0.07698(14) 0.0309(8) Uani 1 1 d . . . 
C9 C 0.13427(16) 0.7528(2) -0.12269(16) 0.0372(9) Uani 1 1 d . . . 
C10 C 0.08488(18) 0.7519(2) -0.12057(15) 0.0383(10) Uani 1 1 d . . . 
H10 H 0.0764 0.7507 -0.0900 0.046 Uiso 1 1 calc R . . 
C11 C 0.04751(19) 0.7527(2) -0.16113(17) 0.0438(11) Uani 1 1 d . . . 
H11 H 0.0144 0.7532 -0.1583 0.053 Uiso 1 1 calc R . . 
C12 C 0.05967(19) 0.7526(2) -0.20493(16) 0.0429(10) Uani 1 1 d . . . 
C13 C 0.10909(18) 0.7507(2) -0.21140(15) 0.0394(10) Uani 1 1 d . . . 
H13 H 0.1163 0.7487 -0.2424 0.047 Uiso 1 1 calc R . . 
C14 C 0.14810(16) 0.7520(2) -0.16837(15) 0.0366(10) Uani 1 1 d . . . 
H14 H 0.1814 0.7523 -0.1707 0.044 Uiso 1 1 calc R . . 
C15 C 0.26777(17) 0.6024(3) -0.01899(15) 0.0395(10) Uani 1 1 d . . . 
C16 C 0.25874(15) 0.5180(2) -0.01253(15) 0.0355(9) Uani 1 1 d . . . 
C17 C 0.28537(16) 0.4647(3) -0.03603(14) 0.0376(9) Uani 1 1 d . . . 
H17 H 0.3062 0.4829 -0.0561 0.045 Uiso 1 1 calc R . . 
C18 C 0.2799(2) 0.3847(3) -0.02860(17) 0.0501(11) Uani 1 1 d . . . 
H18 H 0.2981 0.3484 -0.0428 0.060 Uiso 1 1 calc R . . 
C19 C 0.24585(16) 0.3563(2) 0.00140(14) 0.0357(9) Uani 1 1 d . . . 
C20 C 0.21994(16) 0.4091(3) 0.02100(16) 0.0427(10) Uani 1 1 d . . . 
H20 H 0.1972 0.3908 0.0389 0.051 Uiso 1 1 calc R . . 
C21 C 0.22517(14) 0.4898(3) 0.01605(14) 0.0347(9) Uani 1 1 d . . . 
H21 H 0.2071 0.5251 0.0311 0.042 Uiso 1 1 calc R . . 
C22 C 0.20118(18) 0.4965(2) 0.13368(16) 0.0429(10) Uani 1 1 d . . . 
H22B H 0.1737 0.4789 0.1090 0.052 Uiso 1 1 calc R . . 
H22C H 0.2004 0.4698 0.1638 0.052 Uiso 1 1 calc R . . 
H22A H 0.2318 0.4845 0.1237 0.052 Uiso 1 1 calc R . . 
C23 C 0.23651(18) 0.6279(3) 0.19937(16) 0.0471(11) Uani 1 1 d . . . 
H23A H 0.2549 0.5823 0.2138 0.071 Uiso 1 1 calc R . . 
H23B H 0.2165 0.6478 0.2211 0.071 Uiso 1 1 calc R . . 
H23C H 0.2593 0.6683 0.1937 0.071 Uiso 1 1 calc R . . 
C24 C 0.05312(15) 0.5942(2) 0.04707(16) 0.0383(9) Uani 1 1 d . . . 
H24A H 0.0479 0.5380 0.0431 0.058 Uiso 1 1 calc R . . 
H24B H 0.0215 0.6207 0.0426 0.058 Uiso 1 1 calc R . . 
H24C H 0.0719 0.6050 0.0793 0.058 Uiso 1 1 calc R . . 
C25 C 0.08625(16) 0.5465(2) -0.04030(13) 0.0336(8) Uani 1 1 d . . . 
H25A H 0.0899 0.5655 -0.0717 0.050 Uiso 1 1 calc R . . 
H25B H 0.0551 0.5190 -0.0435 0.050 Uiso 1 1 calc R . . 
H25C H 0.1130 0.5108 -0.0276 0.050 Uiso 1 1 calc R . . 
C26 C 0.30790(19) 0.4106(3) 0.22457(18) 0.0536(12) Uani 1 1 d . . . 
H26A H 0.3235 0.4546 0.2436 0.064 Uiso 1 1 calc R . . 
H26C H 0.3052 0.4218 0.1905 0.064 Uiso 1 1 calc R . . 
H26B H 0.3275 0.3636 0.2331 0.064 Uiso 1 1 calc R . . 
C27 C 0.23251(19) 0.2958(3) 0.24782(17) 0.0499(12) Uani 1 1 d . . . 
H27A H 0.2311 0.2681 0.2176 0.060 Uiso 1 1 calc R . . 
H27C H 0.2027 0.2855 0.2597 0.060 Uiso 1 1 calc R . . 
H27B H 0.2608 0.2778 0.2714 0.060 Uiso 1 1 calc R . . 
C28 C 0.60938(19) 0.0896(3) 0.66910(17) 0.0512(12) Uani 1 1 d . . . 
H28A H 0.6161 0.0438 0.6510 0.077 Uiso 1 1 calc R . . 
H28B H 0.6402 0.1126 0.6857 0.077 Uiso 1 1 calc R . . 
H28C H 0.5911 0.1279 0.6470 0.077 Uiso 1 1 calc R . . 
C29 C 0.50055(18) 0.0657(3) 0.69069(19) 0.0564(13) Uani 1 1 d . . . 
H29A H 0.4863 0.1032 0.7097 0.068 Uiso 1 1 calc R . . 
H29C H 0.4858 0.0145 0.6927 0.068 Uiso 1 1 calc R . . 
H29B H 0.4944 0.0828 0.6572 0.068 Uiso 1 1 calc R . . 
C30 C 0.38576(18) 0.5868(3) 0.37540(17) 0.0514(13) Uani 1 1 d . . . 
H30A H 0.3509 0.5744 0.3680 0.077 Uiso 1 1 calc R . . 
H30B H 0.3902 0.6429 0.3719 0.077 Uiso 1 1 calc R . . 
H30C H 0.3997 0.5711 0.4084 0.077 Uiso 1 1 calc R . . 
C31 C 0.49321(18) 0.5600(3) 0.33637(18) 0.0574(14) Uani 1 1 d . . . 
H31A H 0.5079 0.5220 0.3180 0.086 Uiso 1 1 calc R . . 
H31B H 0.5104 0.5588 0.3699 0.086 Uiso 1 1 calc R . . 
H31C H 0.4957 0.6122 0.3232 0.086 Uiso 1 1 calc R . . 
Sm1 Sm 0.201089(8) 0.732341(12) 0.046101(7) 0.03072(7) Uani 1 1 d . . . 
N1 N -0.00551(16) 0.8145(2) 0.22520(14) 0.0516(10) Uani 1 1 d . . . 
N2 N 0.02515(15) 0.7492(2) -0.24909(15) 0.0467(9) Uani 1 1 d . . . 
N3 N 0.23558(13) 0.27980(19) 0.00498(12) 0.0372(8) Uani 1 1 d . . . 
O1 O 0.18370(11) 0.77417(16) 0.12601(10) 0.0358(6) Uani 1 1 d . . . 
O2 O 0.11994(11) 0.77652(18) 0.06314(11) 0.0437(7) Uani 1 1 d . . . 
O3 O 0.16155(10) 0.75341(15) -0.03498(10) 0.0334(6) Uani 1 1 d . . . 
O4 O 0.21653(11) 0.74748(14) -0.08607(10) 0.0344(6) Uani 1 1 d . . . 
O5 O 0.24651(11) 0.64952(16) 0.00286(10) 0.0378(7) Uani 1 1 d . . . 
O6 O 0.29812(10) 0.62254(16) -0.04619(9) 0.0339(6) Uani 1 1 d . . . 
O7 O 0.22320(10) 0.62710(15) 0.10256(9) 0.0333(6) Uani 1 1 d . . . 
O8 O 0.14044(10) 0.62754(17) 0.02639(10) 0.0369(6) Uani 1 1 d . . . 
O9 O 0.23351(12) 0.42939(19) 0.28809(11) 0.0526(9) Uani 1 1 d . . . 
O10 O 0.57851(11) -0.02593(17) 0.72094(9) 0.0382(6) Uani 1 1 d . . . 
O11 O 0.38590(12) 0.56425(19) 0.28525(11) 0.0476(7) Uani 1 1 d . . . 
O12 O 0.3989(3) 0.1179(4) 0.1625(3) 0.048(2) Uani 0.40 1 d P . . 
H12D H 0.3822 0.1609 0.1591 0.058 Uiso 0.40 1 d PR . . 
H12A H 0.3941 0.0935 0.1878 0.058 Uiso 0.40 1 d PR . . 
O13 O 0.4361(3) 0.1391(5) 0.1144(3) 0.055(2) Uani 0.40 1 d P . . 
H13B H 0.4275 0.1599 0.0862 0.066 Uiso 0.40 1 d PR . . 
H13C H 0.4490 0.1744 0.1349 0.066 Uiso 0.40 1 d PR . . 
O14 O 0.1408(4) 0.7497(5) 0.4290(3) 0.065(3) Uani 0.40 1 d P . . 
H14C H 0.1500 0.7888 0.4137 0.078 Uiso 0.40 1 d PR . . 
H14D H 0.1103 0.7395 0.4173 0.078 Uiso 0.40 1 d PR . . 
O15 O 0.1761(3) 0.5683(4) 0.8958(3) 0.055(2) Uani 0.40 1 d P . . 
H15B H 0.1686 0.5500 0.9218 0.066 Uiso 0.40 1 d PR . . 
H15C H 0.1503 0.5680 0.8728 0.066 Uiso 0.40 1 d PR . . 
O16 O 0.4881(3) 0.3883(5) 0.4889(3) 0.050(2) Uani 0.40 1 d P . . 
H16A H 0.5157 0.3688 0.4851 0.060 Uiso 0.40 1 d PR . . 
H16B H 0.4921 0.4111 0.5166 0.060 Uiso 0.40 1 d PR . . 
O17 O 0.6364(3) 0.5531(4) 0.8591(3) 0.053(2) Uani 0.40 1 d P . . 
H17C H 0.6447 0.5115 0.8761 0.063 Uiso 0.40 1 d PR . . 
H17E H 0.6143 0.5784 0.8704 0.063 Uiso 0.40 1 d PR . . 
O18 O 0.2279(3) 0.3639(5) 0.8162(3) 0.052(2) Uani 0.40 1 d P . . 
H18B H 0.2193 0.3675 0.8437 0.062 Uiso 0.40 1 d PR . . 
H18C H 0.2094 0.3940 0.7956 0.062 Uiso 0.40 1 d PR . . 
O19 O 0.2439(4) 0.2441(7) 0.8624(4) 0.054(3) Uani 0.30 1 d P . . 
H19A H 0.2163 0.2212 0.8628 0.065 Uiso 0.30 1 d PR . . 
H19C H 0.2593 0.2529 0.8916 0.065 Uiso 0.30 1 d PR . . 
O20 O 0.0726(3) 0.0293(6) 0.4738(3) 0.040(2) Uani 0.30 1 d P . . 
H20B H 0.0712 -0.0212 0.4734 0.048 Uiso 0.30 1 d PR . . 
H20C H 0.0434 0.0483 0.4652 0.048 Uiso 0.30 1 d PR . . 
O21 O 0.4085(3) 0.8199(6) 0.4488(4) 0.041(2) Uani 0.30 1 d P . . 
H21D H 0.3871 0.8170 0.4220 0.049 Uiso 0.30 1 d PR . . 
H21A H 0.3942 0.8351 0.4715 0.049 Uiso 0.30 1 d PR . . 
O22 O 0.4530(4) 0.7198(7) 0.4500(4) 0.059(3) Uani 0.30 1 d P . . 
H22D H 0.4751 0.7203 0.4764 0.070 Uiso 0.30 1 d PR . . 
H22E H 0.4349 0.6787 0.4493 0.070 Uiso 0.30 1 d PR . . 
S1 S 0.19677(4) 0.59972(6) 0.14193(4) 0.0355(2) Uani 1 1 d . . . 
S2 S 0.08762(4) 0.63067(6) 0.00144(4) 0.0348(2) Uani 1 1 d . . . 
S3 S 0.23756(5) 0.39315(7) 0.23874(4) 0.0480(3) Uani 1 1 d . . . 
S4 S 0.57129(5) 0.05902(6) 0.71551(4) 0.0460(3) Uani 1 1 d . . . 
S5 S 0.41818(4) 0.53162(6) 0.33198(4) 0.0370(2) Uani 1 1 d . . . 
 
loop_ 
 _atom_site_aniso_label 
 _atom_site_aniso_U_11 
 _atom_site_aniso_U_22 
 _atom_site_aniso_U_33 
 _atom_site_aniso_U_23 
 _atom_site_aniso_U_13 
 _atom_site_aniso_U_12 
C1 0.043(2) 0.043(2) 0.035(2) -0.0046(17) 0.0097(19) -0.0011(19) 
C2 0.051(3) 0.0215(18) 0.042(2) 0.0002(16) 0.0116(19) 0.0229(18) 
C3 0.046(2) 0.033(2) 0.039(2) 0.0017(17) 0.0156(18) -0.0166(18) 
C4 0.047(2) 0.035(2) 0.032(2) 0.0123(17) 0.0129(18) 0.0097(19) 
C5 0.043(2) 0.050(3) 0.050(3) 0.000(2) 0.021(2) 0.001(2) 
C6 0.042(2) 0.040(2) 0.049(2) 0.0120(19) 0.013(2) 0.0114(19) 
C7 0.043(2) 0.036(2) 0.041(2) -0.0132(18) 0.0142(19) -0.0152(18) 
C8 0.042(2) 0.0161(17) 0.035(2) -0.0064(14) 0.0098(17) -0.0023(15) 
C9 0.036(2) 0.032(2) 0.043(2) -0.0025(17) 0.0060(18) -0.0022(17) 
C10 0.052(3) 0.037(2) 0.028(2) 0.0093(16) 0.0139(19) 0.0026(19) 
C11 0.047(3) 0.029(2) 0.049(3) 0.0138(17) -0.006(2) -0.0064(18) 
C12 0.052(3) 0.033(2) 0.041(2) 0.0093(17) 0.002(2) -0.0009(19) 
C13 0.051(3) 0.034(2) 0.029(2) 0.0053(15) -0.0017(18) -0.0085(18) 
C14 0.037(2) 0.0280(19) 0.036(2) 0.0078(15) -0.0136(18) -0.0052(16) 
C15 0.045(2) 0.039(2) 0.037(2) -0.0041(18) 0.0155(19) -0.0115(19) 
C16 0.032(2) 0.039(2) 0.041(2) -0.0008(17) 0.0197(18) -0.0041(17) 
C17 0.040(2) 0.045(2) 0.031(2) 0.0018(17) 0.0138(17) -0.0042(19) 
C18 0.057(3) 0.046(3) 0.049(3) -0.001(2) 0.015(2) -0.004(2) 
C19 0.039(2) 0.026(2) 0.041(2) -0.0024(16) 0.0058(18) -0.0001(16) 
C20 0.041(2) 0.046(2) 0.049(2) -0.021(2) 0.030(2) -0.015(2) 
C21 0.0229(18) 0.052(2) 0.0297(19) -0.0014(17) 0.0072(16) -0.0043(17) 
C22 0.051(3) 0.027(2) 0.045(2) 0.0060(17) -0.004(2) -0.0074(18) 
C23 0.052(3) 0.049(3) 0.043(2) -0.011(2) 0.016(2) -0.016(2) 
C24 0.034(2) 0.0294(19) 0.050(2) 0.0173(18) 0.0063(19) -0.0032(17) 
C25 0.046(2) 0.0271(19) 0.0288(19) 0.0005(15) 0.0106(17) 0.0003(17) 
C26 0.058(3) 0.053(3) 0.053(3) 0.003(2) 0.018(2) 0.026(2) 
C27 0.055(3) 0.058(3) 0.044(2) -0.023(2) 0.028(2) 0.013(2) 
C28 0.056(3) 0.055(3) 0.045(3) 0.012(2) 0.017(2) -0.008(2) 
C29 0.043(3) 0.064(3) 0.054(3) -0.017(2) -0.010(2) 0.008(2) 
C30 0.052(3) 0.056(3) 0.052(3) -0.006(2) 0.023(2) 0.039(2) 
C31 0.042(3) 0.073(3) 0.054(3) -0.022(2) 0.000(2) 0.028(2) 
Sm1 0.03420(12) 0.03187(11) 0.02587(10) -0.00328(8) 0.00563(8) -0.01115(8) 
N1 0.057(2) 0.051(2) 0.053(2) -0.0056(18) 0.027(2) -0.004(2) 
N2 0.045(2) 0.050(2) 0.047(2) 0.0079(17) 0.0133(18) -0.0097(17) 
N3 0.0335(18) 0.0324(17) 0.0396(18) -0.0148(15) -0.0070(15) 0.0054(14) 
O1 0.0349(16) 0.0382(15) 0.0371(15) -0.0085(12) 0.0138(12) -0.0123(12) 
O2 0.0359(16) 0.0519(18) 0.0441(17) 0.0090(14) 0.0100(13) -0.0059(14) 
O3 0.0365(15) 0.0329(14) 0.0304(14) -0.0033(11) 0.0054(12) -0.0199(12) 
O4 0.0379(16) 0.0194(13) 0.0433(16) -0.0086(11) 0.0021(13) -0.0063(10) 
O5 0.0406(17) 0.0306(15) 0.0418(16) 0.0046(12) 0.0079(13) 0.0058(12) 
O6 0.0389(16) 0.0329(14) 0.0296(13) -0.0018(11) 0.0060(12) -0.0130(12) 
O7 0.0421(16) 0.0298(13) 0.0276(13) -0.0070(11) 0.0062(12) -0.0114(12) 
O8 0.0262(14) 0.0440(16) 0.0428(15) 0.0017(13) 0.0124(12) -0.0119(12) 
O9 0.0445(17) 0.0493(18) 0.0485(18) 0.0271(15) -0.0270(14) -0.0045(15) 
O10 0.0378(15) 0.0459(17) 0.0280(14) 0.0047(12) 0.0002(12) 0.0072(13) 
O11 0.0527(19) 0.0489(18) 0.0420(16) -0.0096(14) 0.0114(14) 0.0118(15) 
O12 0.038(4) 0.034(4) 0.075(5) -0.002(4) 0.017(4) 0.029(3) 
O13 0.067(6) 0.065(5) 0.033(4) 0.005(4) 0.009(4) -0.032(5) 
O14 0.100(8) 0.057(5) 0.039(5) 0.025(4) 0.019(5) 0.008(5) 
O15 0.042(4) 0.036(4) 0.085(6) -0.012(4) 0.009(4) 0.001(3) 
O16 0.036(4) 0.051(5) 0.054(5) 0.001(4) -0.013(4) 0.013(4) 
O17 0.065(5) 0.034(4) 0.054(5) 0.009(3) 0.002(4) 0.000(4) 
O18 0.046(5) 0.070(5) 0.038(4) -0.010(4) 0.004(3) 0.024(4) 
O19 0.024(5) 0.075(7) 0.050(6) -0.020(5) -0.023(5) 0.006(5) 
O20 0.026(4) 0.048(5) 0.050(5) -0.034(5) 0.018(4) -0.001(4) 
O21 0.017(4) 0.047(6) 0.055(6) -0.019(5) 0.000(4) -0.014(4) 
O22 0.056(7) 0.069(7) 0.048(6) 0.040(6) 0.003(5) 0.002(6) 
S1 0.0449(6) 0.0260(5) 0.0380(5) -0.0071(4) 0.0145(5) 0.0007(4) 
S2 0.0282(5) 0.0344(5) 0.0462(5) -0.0113(4) 0.0178(4) -0.0091(4) 
S3 0.0480(6) 0.0531(7) 0.0444(6) -0.0239(5) 0.0126(5) 0.0152(5) 
S4 0.0529(7) 0.0361(6) 0.0416(6) 0.0133(5) -0.0078(5) 0.0004(5) 
S5 0.0325(5) 0.0458(6) 0.0385(5) 0.0088(4) 0.0209(4) 0.0148(4) 
 
_geom_special_details 
; 
 All esds (except the esd in the dihedral angle between two l.s. planes) 
 are estimated using the full covariance matrix.  The cell esds are taken 
 into account individually in the estimation of esds in distances, angles 
 and torsion angles; correlations between esds in cell parameters are only 
 used when they are defined by crystal symmetry.  An approximate (isotropic) 
 treatment of cell esds is used for estimating esds involving l.s. planes. 
; 
 
loop_ 
 _geom_bond_atom_site_label_1 
 _geom_bond_atom_site_label_2 
 _geom_bond_distance 
 _geom_bond_site_symmetry_2 
 _geom_bond_publ_flag 
C1 O1 1.236(5) . ? 
C1 O2 1.306(5) . ? 
C1 C2 1.489(6) . ? 
C1 Sm1 2.845(4) . ? 
C2 C7 1.387(6) . ? 
C2 C3 1.412(6) . ? 
C3 C4 1.409(6) . ? 
C3 H3 0.9300 . ? 
C4 C5 1.380(6) . ? 
C4 H4 0.9300 . ? 
C5 N1 1.405(6) . ? 
C5 C6 1.426(6) . ? 
C6 C7 1.372(6) . ? 
C6 H6 0.9300 . ? 
C7 H7 0.9300 . ? 
C8 O3 1.271(5) . ? 
C8 O4 1.286(5) . ? 
C8 C9 1.480(6) . ? 
C9 C10 1.370(6) . ? 
C9 C14 1.405(6) . ? 
C10 C11 1.366(6) . ? 
C10 H10 0.9300 . ? 
C11 C12 1.334(7) . ? 
C11 H11 0.9300 . ? 
C12 N2 1.396(6) . ? 
C12 C13 1.406(7) . ? 
C13 C14 1.439(5) . ? 
C13 H13 0.9300 . ? 
C14 H14 0.9300 . ? 
C15 O5 1.221(5) . ? 
C15 O6 1.284(5) . ? 
C15 C16 1.459(6) . ? 
C15 Sm1 3.053(4) 7_565 ? 
C16 C17 1.403(6) . ? 
C16 C21 1.420(5) . ? 
C17 C18 1.375(6) . ? 
C17 H17 0.9300 . ? 
C18 C19 1.459(6) . ? 
C18 H18 0.9300 . ? 
C19 C20 1.325(6) . ? 
C19 N3 1.327(5) . ? 
C20 C21 1.376(6) . ? 
C20 H20 0.9300 . ? 
C21 H21 0.9300 . ? 
C22 S1 1.761(4) . ? 
C22 H22B 0.9600 . ? 
C22 H22C 0.9600 . ? 
C22 H22A 0.9600 . ? 
C23 S1 1.811(4) . ? 
C23 H23A 0.9600 . ? 
C23 H23B 0.9600 . ? 
C23 H23C 0.9600 . ? 
C24 S2 1.843(4) . ? 
C24 H24A 0.9600 . ? 
C24 H24B 0.9600 . ? 
C24 H24C 0.9600 . ? 
C25 S2 1.832(4) . ? 
C25 H25A 0.9600 . ? 
C25 H25B 0.9600 . ? 
C25 H25C 0.9600 . ? 
C26 S3 2.071(5) . ? 
C26 H26A 0.9600 . ? 
C26 H26C 0.9600 . ? 
C26 H26B 0.9600 . ? 
C27 S3 1.669(5) . ? 
C27 H27A 0.9600 . ? 
C27 H27C 0.9600 . ? 
C27 H27B 0.9600 . ? 
C28 S4 1.897(5) . ? 
C28 H28A 0.9600 . ? 
C28 H28B 0.9600 . ? 
C28 H28C 0.9600 . ? 
C29 S4 1.929(5) . ? 
C29 H29A 0.9600 . ? 
C29 H29C 0.9600 . ? 
C29 H29B 0.9600 . ? 
C30 S5 1.890(4) . ? 
C30 H30A 0.9600 . ? 
C30 H30B 0.9600 . ? 
C30 H30C 0.9600 . ? 
C31 S5 2.095(5) . ? 
C31 H31A 0.9600 . ? 
C31 H31B 0.9600 . ? 
C31 H31C 0.9600 . ? 
Sm1 O3 2.332(3) . ? 
Sm1 O4 2.335(3) 7_565 ? 
Sm1 O5 2.362(3) . ? 
Sm1 O7 2.368(3) . ? 
Sm1 O8 2.412(3) . ? 
Sm1 O6 2.444(3) 7_565 ? 
Sm1 O1 2.481(3) . ? 
Sm1 O2 2.486(3) . ? 
Sm1 O5 2.951(3) 7_565 ? 
Sm1 C15 3.053(4) 7_565 ? 
N1 N1 1.358(8) 2 ? 
N2 N2 1.372(8) 2_554 ? 
N3 N3 1.343(6) 7 ? 
O4 Sm1 2.335(3) 7_565 ? 
O5 Sm1 2.951(3) 7_565 ? 
O6 Sm1 2.444(3) 7_565 ? 
O7 S1 1.509(3) . ? 
O8 S2 1.477(3) . ? 
O9 S3 1.534(4) . ? 
O10 S4 1.448(3) . ? 
O11 S5 1.524(3) . ? 
O12 H12D 0.8513 . ? 
O12 H12A 0.8512 . ? 
O13 H13B 0.8519 . ? 
O13 H13C 0.8516 . ? 
O14 H14C 0.8509 . ? 
O14 H14D 0.8535 . ? 
O15 H15B 0.8512 . ? 
O15 H15C 0.8534 . ? 
O16 H16A 0.8525 . ? 
O16 H16B 0.8511 . ? 
O17 H17C 0.8510 . ? 
O17 H17E 0.8518 . ? 
O18 H18B 0.8515 . ? 
O18 H18C 0.8522 . ? 
O19 H19A 0.8524 . ? 
O19 H19C 0.8525 . ? 
O20 H20B 0.8506 . ? 
O20 H20C 0.8530 . ? 
O21 H21D 0.8531 . ? 
O21 H21A 0.8514 . ? 
O22 H22D 0.8531 . ? 
O22 H22E 0.8515 . ? 
 
loop_ 
 _geom_angle_atom_site_label_1 
 _geom_angle_atom_site_label_2 
 _geom_angle_atom_site_label_3 
 _geom_angle 
 _geom_angle_site_symmetry_1 
 _geom_angle_site_symmetry_3 
 _geom_angle_publ_flag 
O1 C1 O2 121.2(4) . . ? 
O1 C1 C2 125.7(4) . . ? 
O2 C1 C2 113.1(4) . . ? 
O1 C1 Sm1 60.5(2) . . ? 
O2 C1 Sm1 60.9(2) . . ? 
C2 C1 Sm1 173.1(3) . . ? 
C7 C2 C3 119.5(4) . . ? 
C7 C2 C1 122.1(4) . . ? 
C3 C2 C1 113.6(4) . . ? 
C4 C3 C2 118.3(4) . . ? 
C4 C3 H3 120.9 . . ? 
C2 C3 H3 120.9 . . ? 
C5 C4 C3 119.6(4) . . ? 
C5 C4 H4 120.2 . . ? 
C3 C4 H4 120.2 . . ? 
C4 C5 N1 124.8(4) . . ? 
C4 C5 C6 121.9(4) . . ? 
N1 C5 C6 113.1(4) . . ? 
C7 C6 C5 117.0(4) . . ? 
C7 C6 H6 121.5 . . ? 
C5 C6 H6 121.5 . . ? 
C6 C7 C2 122.0(4) . . ? 
C6 C7 H7 119.0 . . ? 
C2 C7 H7 119.0 . . ? 
O3 C8 O4 126.4(4) . . ? 
O3 C8 C9 122.5(4) . . ? 
O4 C8 C9 111.1(4) . . ? 
C10 C9 C14 119.5(4) . . ? 
C10 C9 C8 119.8(4) . . ? 
C14 C9 C8 120.6(4) . . ? 
C11 C10 C9 123.2(4) . . ? 
C11 C10 H10 118.4 . . ? 
C9 C10 H10 118.4 . . ? 
C12 C11 C10 118.4(5) . . ? 
C12 C11 H11 120.8 . . ? 
C10 C11 H11 120.8 . . ? 
C11 C12 N2 124.1(5) . . ? 
C11 C12 C13 123.2(4) . . ? 
N2 C12 C13 112.6(4) . . ? 
C12 C13 C14 117.8(4) . . ? 
C12 C13 H13 121.1 . . ? 
C14 C13 H13 121.1 . . ? 
C9 C14 C13 117.8(4) . . ? 
C9 C14 H14 121.1 . . ? 
C13 C14 H14 121.1 . . ? 
O5 C15 O6 124.0(4) . . ? 
O5 C15 C16 117.4(4) . . ? 
O6 C15 C16 118.6(4) . . ? 
O5 C15 Sm1 73.6(2) . 7_565 ? 
O6 C15 Sm1 50.4(2) . 7_565 ? 
C16 C15 Sm1 169.0(3) . 7_565 ? 
C17 C16 C21 120.6(4) . . ? 
C17 C16 C15 116.5(4) . . ? 
C21 C16 C15 122.8(4) . . ? 
C18 C17 C16 118.2(4) . . ? 
C18 C17 H17 120.9 . . ? 
C16 C17 H17 120.9 . . ? 
C17 C18 C19 120.7(4) . . ? 
C17 C18 H18 119.7 . . ? 
C19 C18 H18 119.7 . . ? 
C20 C19 N3 118.6(4) . . ? 
C20 C19 C18 118.7(4) . . ? 
N3 C19 C18 122.2(4) . . ? 
C19 C20 C21 123.0(4) . . ? 
C19 C20 H20 118.5 . . ? 
C21 C20 H20 118.5 . . ? 
C20 C21 C16 118.7(4) . . ? 
C20 C21 H21 120.6 . . ? 
C16 C21 H21 120.6 . . ? 
S1 C22 H22B 109.5 . . ? 
S1 C22 H22C 109.5 . . ? 
H22B C22 H22C 109.5 . . ? 
S1 C22 H22A 109.5 . . ? 
H22B C22 H22A 109.5 . . ? 
H22C C22 H22A 109.5 . . ? 
S1 C23 H23A 109.5 . . ? 
S1 C23 H23B 109.5 . . ? 
H23A C23 H23B 109.5 . . ? 
S1 C23 H23C 109.5 . . ? 
H23A C23 H23C 109.5 . . ? 
H23B C23 H23C 109.5 . . ? 
S2 C24 H24A 109.5 . . ? 
S2 C24 H24B 109.5 . . ? 
H24A C24 H24B 109.5 . . ? 
S2 C24 H24C 109.5 . . ? 
H24A C24 H24C 109.5 . . ? 
H24B C24 H24C 109.5 . . ? 
S2 C25 H25A 109.5 . . ? 
S2 C25 H25B 109.5 . . ? 
H25A C25 H25B 109.5 . . ? 
S2 C25 H25C 109.5 . . ? 
H25A C25 H25C 109.5 . . ? 
H25B C25 H25C 109.5 . . ? 
S3 C26 H26A 109.5 . . ? 
S3 C26 H26C 109.5 . . ? 
H26A C26 H26C 109.5 . . ? 
S3 C26 H26B 109.5 . . ? 
H26A C26 H26B 109.5 . . ? 
H26C C26 H26B 109.5 . . ? 
S3 C27 H27A 109.5 . . ? 
S3 C27 H27C 109.5 . . ? 
H27A C27 H27C 109.5 . . ? 
S3 C27 H27B 109.5 . . ? 
H27A C27 H27B 109.5 . . ? 
H27C C27 H27B 109.5 . . ? 
S4 C28 H28A 109.5 . . ? 
S4 C28 H28B 109.5 . . ? 
H28A C28 H28B 109.5 . . ? 
S4 C28 H28C 109.5 . . ? 
H28A C28 H28C 109.5 . . ? 
H28B C28 H28C 109.5 . . ? 
S4 C29 H29A 109.5 . . ? 
S4 C29 H29C 109.5 . . ? 
H29A C29 H29C 109.5 . . ? 
S4 C29 H29B 109.5 . . ? 
H29A C29 H29B 109.5 . . ? 
H29C C29 H29B 109.5 . . ? 
S5 C30 H30A 109.5 . . ? 
S5 C30 H30B 109.5 . . ? 
H30A C30 H30B 109.5 . . ? 
S5 C30 H30C 109.5 . . ? 
H30A C30 H30C 109.5 . . ? 
H30B C30 H30C 109.5 . . ? 
S5 C31 H31A 109.5 . . ? 
S5 C31 H31B 109.5 . . ? 
H31A C31 H31B 109.5 . . ? 
S5 C31 H31C 109.5 . . ? 
H31A C31 H31C 109.5 . . ? 
H31B C31 H31C 109.5 . . ? 
O3 Sm1 O4 131.03(10) . 7_565 ? 
O3 Sm1 O5 77.40(10) . . ? 
O4 Sm1 O5 76.67(10) 7_565 . ? 
O3 Sm1 O7 140.07(8) . . ? 
O4 Sm1 O7 72.44(9) 7_565 . ? 
O5 Sm1 O7 79.00(9) . . ? 
O3 Sm1 O8 74.11(9) . . ? 
O4 Sm1 O8 140.58(9) 7_565 . ? 
O5 Sm1 O8 82.15(10) . . ? 
O7 Sm1 O8 71.11(9) . . ? 
O3 Sm1 O6 81.44(9) . 7_565 ? 
O4 Sm1 O6 81.17(9) 7_565 7_565 ? 
O5 Sm1 O6 125.83(9) . 7_565 ? 
O7 Sm1 O6 138.28(8) . 7_565 ? 
O8 Sm1 O6 137.50(9) . 7_565 ? 
O3 Sm1 O1 134.06(10) . . ? 
O4 Sm1 O1 82.73(10) 7_565 . ? 
O5 Sm1 O1 147.97(10) . . ? 
O7 Sm1 O1 71.47(9) . . ? 
O8 Sm1 O1 99.36(9) . . ? 
O6 Sm1 O1 73.65(9) 7_565 . ? 
O3 Sm1 O2 83.28(10) . . ? 
O4 Sm1 O2 133.14(10) 7_565 . ? 
O5 Sm1 O2 149.60(10) . . ? 
O7 Sm1 O2 102.36(10) . . ? 
O8 Sm1 O2 70.02(10) . . ? 
O6 Sm1 O2 73.06(10) 7_565 . ? 
O1 Sm1 O2 52.95(10) . . ? 
O3 Sm1 C1 109.95(12) . . ? 
O4 Sm1 C1 107.69(11) 7_565 . ? 
O5 Sm1 C1 161.58(11) . . ? 
O7 Sm1 C1 85.26(11) . . ? 
O8 Sm1 C1 83.77(11) . . ? 
O6 Sm1 C1 72.51(11) 7_565 . ? 
O1 Sm1 C1 25.68(11) . . ? 
O2 Sm1 C1 27.31(11) . . ? 
O3 Sm1 O5 67.72(8) . 7_565 ? 
O4 Sm1 O5 66.87(9) 7_565 7_565 ? 
O5 Sm1 O5 78.57(9) . 7_565 ? 
O7 Sm1 O5 136.94(9) . 7_565 ? 
O8 Sm1 O5 140.06(8) . 7_565 ? 
O6 Sm1 O5 47.26(8) 7_565 7_565 ? 
O1 Sm1 O5 115.36(8) . 7_565 ? 
O2 Sm1 O5 115.37(9) . 7_565 ? 
C1 Sm1 O5 119.76(10) . 7_565 ? 
O3 Sm1 C15 73.65(10) . 7_565 ? 
O4 Sm1 C15 72.11(11) 7_565 7_565 ? 
O5 Sm1 C15 101.96(11) . 7_565 ? 
O7 Sm1 C15 143.22(11) . 7_565 ? 
O8 Sm1 C15 145.67(11) . 7_565 ? 
O6 Sm1 C15 23.88(10) 7_565 7_565 ? 
O1 Sm1 C15 94.59(10) . 7_565 ? 
O2 Sm1 C15 94.73(11) . 7_565 ? 
C1 Sm1 C15 96.37(12) . 7_565 ? 
O5 Sm1 C15 23.39(9) 7_565 7_565 ? 
N1 N1 C5 119.7(5) 2 . ? 
N2 N2 C12 122.0(5) 2_554 . ? 
C19 N3 N3 124.5(5) . 7 ? 
C1 O1 Sm1 93.8(2) . . ? 
C1 O2 Sm1 91.8(3) . . ? 
C8 O3 Sm1 138.0(3) . . ? 
C8 O4 Sm1 139.1(3) . 7_565 ? 
C15 O5 Sm1 175.4(3) . . ? 
C15 O5 Sm1 83.0(2) . 7_565 ? 
Sm1 O5 Sm1 101.43(9) . 7_565 ? 
C15 O6 Sm1 105.7(3) . 7_565 ? 
S1 O7 Sm1 128.22(17) . . ? 
S2 O8 Sm1 130.39(17) . . ? 
H12D O12 H12A 109.4 . . ? 
H13B O13 H13C 109.6 . . ? 
H14C O14 H14D 109.4 . . ? 
H15B O15 H15C 109.4 . . ? 
H16A O16 H16B 109.3 . . ? 
H17C O17 H17E 109.5 . . ? 
H18B O18 H18C 109.4 . . ? 
H19A O19 H19C 109.6 . . ? 
H20B O20 H20C 109.4 . . ? 
H21D O21 H21A 109.4 . . ? 
H22D O22 H22E 109.6 . . ? 
O7 S1 C22 98.61(19) . . ? 
O7 S1 C23 105.93(19) . . ? 
C22 S1 C23 109.2(2) . . ? 
O8 S2 C25 99.43(18) . . ? 
O8 S2 C24 104.80(18) . . ? 
C25 S2 C24 103.71(19) . . ? 
O9 S3 C27 103.32(19) . . ? 
O9 S3 C26 111.0(2) . . ? 
C27 S3 C26 106.2(2) . . ? 
O10 S4 C28 104.9(2) . . ? 
O10 S4 C29 101.6(2) . . ? 
C28 S4 C29 113.2(2) . . ? 
O11 S5 C30 96.06(18) . . ? 
O11 S5 C31 111.2(2) . . ? 
C30 S5 C31 115.9(2) . . ? 
 
_diffrn_measured_fraction_theta_max    0.999 
_diffrn_reflns_theta_full              27.00 
_diffrn_measured_fraction_theta_full   0.999 
_refine_diff_density_max    1.345 
_refine_diff_density_min   -1.155 
_refine_diff_density_rms    0.091 

#===END


data_9Eu
_database_code_depnum_ccdc_archive 'CCDC 745293'
_audit_creation_method           SHELXL-2000
_chemical_name_systematic        
;
?
; 
_chemical_name_common             ? 
_chemical_melting_point           ? 
_chemical_formula_moiety          ? 
_chemical_formula_sum 
 'C31 H50 Eu N3 O15 S5' 
_chemical_formula_weight          1017.00 
 
loop_ 
 _atom_type_symbol 
 _atom_type_description 
 _atom_type_scat_dispersion_real 
 _atom_type_scat_dispersion_imag 
 _atom_type_scat_source 
 'C'  'C'   0.0033   0.0016 
 'International Tables Vol C Tables 4.2.6.8 and 6.1.1.4' 
 'H'  'H'   0.0000   0.0000 
 'International Tables Vol C Tables 4.2.6.8 and 6.1.1.4' 
 'N'  'N'   0.0061   0.0033 
 'International Tables Vol C Tables 4.2.6.8 and 6.1.1.4' 
 'O'  'O'   0.0106   0.0060 
 'International Tables Vol C Tables 4.2.6.8 and 6.1.1.4' 
 'S'  'S'   0.1246   0.1234 
 'International Tables Vol C Tables 4.2.6.8 and 6.1.1.4' 
 'Eu'  'Eu'  -0.1578   3.6682 
 'International Tables Vol C Tables 4.2.6.8 and 6.1.1.4' 
 
_symmetry_cell_setting           'Monoclinic'
_symmetry_space_group_name_H-M   'C2/c'
_symmetry_space_group_name_Hall   '-C 2yc'
 
loop_ 
 _symmetry_equiv_pos_as_xyz 
 'x, y, z' 
 '-x, y, -z+1/2' 
 'x+1/2, y+1/2, z' 
 '-x+1/2, y+1/2, -z+1/2' 
 '-x, -y, -z' 
 'x, -y, z-1/2' 
 '-x+1/2, -y+1/2, -z' 
 'x+1/2, -y+1/2, z-1/2' 
 
_cell_length_a                    27.441(4) 
_cell_length_b                    16.864(3) 
_cell_length_c                    27.919(4) 
_cell_angle_alpha                 90.00 
_cell_angle_beta                  101.880(3) 
_cell_angle_gamma                 90.00 
_cell_volume                      12643(3) 
_cell_formula_units_Z             8 
_cell_measurement_temperature     291(2) 
_cell_measurement_reflns_used     3966
_cell_measurement_theta_min       2.41 
_cell_measurement_theta_max       26.83 
 
_exptl_crystal_description        block 
_exptl_crystal_colour             red 
_exptl_crystal_size_max           0.30 
_exptl_crystal_size_mid           0.26 
_exptl_crystal_size_min           0.24 
_exptl_crystal_density_meas       ? 
_exptl_crystal_density_diffrn     1.069 
_exptl_crystal_density_method     'not measured' 
_exptl_crystal_F_000              4160 
_exptl_absorpt_coefficient_mu     1.202 
_exptl_absorpt_correction_type    'multi-scan'
_exptl_absorpt_correction_T_min   0.70
_exptl_absorpt_correction_T_max   0.75
_exptl_absorpt_process_details    'SADABS; Bruker, 2000' 
 
_exptl_special_details 
; 
 ? 
; 
 
_diffrn_ambient_temperature       291(2) 
_diffrn_radiation_wavelength      0.71073 
_diffrn_radiation_type           'MoK\a'
_diffrn_radiation_source         'sealed tube'
_diffrn_radiation_monochromator  'graphite'
_diffrn_measurement_device_type  'Bruker Smart Apex CCD'
_diffrn_measurement_method       'phi and omega scans'
_diffrn_detector_area_resol_mean  ? 
_diffrn_standards_number          ? 
_diffrn_standards_interval_count  ? 
_diffrn_standards_interval_time   ? 
_diffrn_standards_decay_%         ? 
_diffrn_reflns_number             33643 
_diffrn_reflns_av_R_equivalents   0.0307 
_diffrn_reflns_av_sigmaI/netI     0.0469 
_diffrn_reflns_limit_h_min        -33 
_diffrn_reflns_limit_h_max        33 
_diffrn_reflns_limit_k_min        -20 
_diffrn_reflns_limit_k_max        20 
_diffrn_reflns_limit_l_min        -18 
_diffrn_reflns_limit_l_max        34 
_diffrn_reflns_theta_min          1.68 
_diffrn_reflns_theta_max          26.00 
_reflns_number_total              12403 
_reflns_number_gt                 9912 
_reflns_threshold_expression      >2sigma(I) 
 
_computing_data_collection      'SMART (Bruker, 2000)'
_computing_cell_refinement      'SMART'
_computing_data_reduction       'SAINT (Bruker, 2000)'
_computing_structure_solution   'SHELXTL (Bruker, 2000)'
_computing_structure_refinement 'SHELXTL'
_computing_molecular_graphics   'SHELXTL'
_computing_publication_material 'SHELXTL'
 
_refine_special_details 
; 
 Refinement of F^2^ against ALL reflections.  The weighted R-factor wR and 
 goodness of fit S are based on F^2^, conventional R-factors R are based 
 on F, with F set to zero for negative F^2^. The threshold expression of 
 F^2^ > 2sigma(F^2^) is used only for calculating R-factors(gt) etc. and is 
 not relevant to the choice of reflections for refinement.  R-factors based 
 on F^2^ are statistically about twice as large as those based on F, and R- 
 factors based on ALL data will be even larger. 
; 
 
_refine_ls_structure_factor_coef  Fsqd  
_refine_ls_matrix_type            full 
_refine_ls_weighting_scheme       calc  
_refine_ls_weighting_details 
 'calc w=1/[\s^2^(Fo^2^)+(0.05P)^2^+1.88P] where P=(Fo^2^+2Fc^2^)/3' 
_atom_sites_solution_primary      direct 
_atom_sites_solution_secondary    difmap 
_atom_sites_solution_hydrogens    geom 
_refine_ls_hydrogen_treatment     constr
_refine_ls_extinction_method      none 
_refine_ls_extinction_coef        ? 
_refine_ls_number_reflns          12403 
_refine_ls_number_parameters      569 
_refine_ls_number_restraints      0 
_refine_ls_R_factor_all           0.0596 
_refine_ls_R_factor_gt            0.0399 
_refine_ls_wR_factor_ref          0.0888 
_refine_ls_wR_factor_gt           0.0844 
_refine_ls_goodness_of_fit_ref    1.023 
_refine_ls_restrained_S_all       1.023 
_refine_ls_shift/su_max           0.000 
_refine_ls_shift/su_mean          0.000 
 
loop_ 
 _atom_site_label 
 _atom_site_type_symbol 
 _atom_site_fract_x 
 _atom_site_fract_y 
 _atom_site_fract_z 
 _atom_site_U_iso_or_equiv 
 _atom_site_adp_type 
 _atom_site_occupancy 
 _atom_site_symmetry_multiplicity 
 _atom_site_calc_flag 
 _atom_site_refinement_flags 
 _atom_site_disorder_assembly 
 _atom_site_disorder_group 
C1 C 0.13929(14) 0.7846(2) 0.11000(13) 0.0419(8) Uani 1 1 d . . . 
C2 C 0.10135(13) 0.80648(18) 0.13885(13) 0.0403(8) Uani 1 1 d . . . 
C3 C 0.11749(14) 0.7955(2) 0.18987(13) 0.0405(8) Uani 1 1 d . . . 
H3 H 0.1506 0.7838 0.2033 0.049 Uiso 1 1 calc R . . 
C4 C 0.08265(12) 0.80255(19) 0.21970(12) 0.0361(7) Uani 1 1 d . . . 
H4 H 0.0930 0.8004 0.2536 0.043 Uiso 1 1 calc R . . 
C5 C 0.03275(14) 0.8127(2) 0.19899(14) 0.0459(8) Uani 1 1 d . . . 
C6 C 0.01558(13) 0.81582(19) 0.14748(13) 0.0403(8) Uani 1 1 d . . . 
H6 H -0.0178 0.8240 0.1335 0.048 Uiso 1 1 calc R . . 
C7 C 0.05050(12) 0.80618(19) 0.11917(13) 0.0388(7) Uani 1 1 d . . . 
H7 H 0.0398 0.7992 0.0856 0.047 Uiso 1 1 calc R . . 
C8 C 0.17271(13) 0.75113(16) -0.07683(12) 0.0324(7) Uani 1 1 d . . . 
C9 C 0.13442(13) 0.75253(19) -0.12299(13) 0.0382(7) Uani 1 1 d . . . 
C10 C 0.08468(13) 0.75200(19) -0.12042(12) 0.0382(7) Uani 1 1 d . . . 
H10 H 0.0762 0.7513 -0.0898 0.046 Uiso 1 1 calc R . . 
C11 C 0.04748(15) 0.7525(2) -0.16130(14) 0.0457(9) Uani 1 1 d . . . 
H11 H 0.0142 0.7527 -0.1587 0.055 Uiso 1 1 calc R . . 
C12 C 0.05977(14) 0.7526(2) -0.20466(14) 0.0436(8) Uani 1 1 d . . . 
C13 C 0.10914(14) 0.75069(19) -0.21146(13) 0.0406(8) Uani 1 1 d . . . 
H13 H 0.1162 0.7491 -0.2426 0.049 Uiso 1 1 calc R . . 
C14 C 0.14801(13) 0.75128(17) -0.16848(12) 0.0350(7) Uani 1 1 d . . . 
H14 H 0.1813 0.7508 -0.1708 0.042 Uiso 1 1 calc R . . 
Eu1 Eu 0.201046(6) 0.732384(9) 0.046089(5) 0.03080(6) Uani 1 1 d . . . 
C15 C 0.26745(11) 0.60304(18) -0.01905(11) 0.0308(6) Uani 1 1 d . . . 
C16 C 0.25878(12) 0.51822(19) -0.01255(13) 0.0371(7) Uani 1 1 d . . . 
C17 C 0.28552(12) 0.4647(2) -0.03588(12) 0.0390(7) Uani 1 1 d . . . 
H17 H 0.3067 0.4826 -0.0556 0.047 Uiso 1 1 calc R . . 
C18 C 0.27945(15) 0.3847(2) -0.02855(14) 0.0500(9) Uani 1 1 d . . . 
H18 H 0.2974 0.3483 -0.0431 0.060 Uiso 1 1 calc R . . 
C19 C 0.24597(12) 0.35604(18) 0.00114(12) 0.0367(7) Uani 1 1 d . . . 
C20 C 0.22019(13) 0.4090(2) 0.02126(14) 0.0443(9) Uani 1 1 d . . . 
H20 H 0.1978 0.3906 0.0396 0.053 Uiso 1 1 calc R . . 
C21 C 0.22512(11) 0.4896(2) 0.01608(12) 0.0352(7) Uani 1 1 d . . . 
H21 H 0.2068 0.5247 0.0310 0.042 Uiso 1 1 calc R . . 
C22 C 0.20091(13) 0.49669(18) 0.13329(13) 0.0435(8) Uani 1 1 d . . . 
H22B H 0.1731 0.4794 0.1088 0.052 Uiso 1 1 calc R . . 
H22C H 0.2006 0.4698 0.1635 0.052 Uiso 1 1 calc R . . 
H22A H 0.2313 0.4848 0.1229 0.052 Uiso 1 1 calc R . . 
C23 C 0.23637(13) 0.6282(2) 0.19895(13) 0.0439(8) Uani 1 1 d . . . 
H23A H 0.2551 0.5830 0.2133 0.066 Uiso 1 1 calc R . . 
H23B H 0.2164 0.6477 0.2208 0.066 Uiso 1 1 calc R . . 
H23C H 0.2588 0.6690 0.1931 0.066 Uiso 1 1 calc R . . 
C24 C 0.05288(12) 0.59487(19) 0.04714(13) 0.0389(8) Uani 1 1 d . . . 
H24A H 0.0487 0.5384 0.0442 0.058 Uiso 1 1 calc R . . 
H24B H 0.0208 0.6199 0.0416 0.058 Uiso 1 1 calc R . . 
H24C H 0.0710 0.6076 0.0794 0.058 Uiso 1 1 calc R . . 
C25 C 0.08616(13) 0.54616(17) -0.04039(12) 0.0340(7) Uani 1 1 d . . . 
H25A H 0.0907 0.5649 -0.0717 0.051 Uiso 1 1 calc R . . 
H25B H 0.0546 0.5196 -0.0442 0.051 Uiso 1 1 calc R . . 
H25C H 0.1124 0.5098 -0.0272 0.051 Uiso 1 1 calc R . . 
C26 C 0.30777(14) 0.4109(2) 0.22438(15) 0.0516(9) Uani 1 1 d . . . 
H26A H 0.3236 0.4545 0.2437 0.062 Uiso 1 1 calc R . . 
H26C H 0.3049 0.4227 0.1903 0.062 Uiso 1 1 calc R . . 
H26B H 0.3274 0.3638 0.2325 0.062 Uiso 1 1 calc R . . 
C27 C 0.23242(14) 0.2961(2) 0.24756(14) 0.0485(9) Uani 1 1 d . . . 
H27A H 0.2297 0.2689 0.2169 0.058 Uiso 1 1 calc R . . 
H27C H 0.2032 0.2861 0.2605 0.058 Uiso 1 1 calc R . . 
H27B H 0.2613 0.2775 0.2703 0.058 Uiso 1 1 calc R . . 
C28 C 0.60989(15) 0.0895(2) 0.66929(14) 0.0517(9) Uani 1 1 d . . . 
H28A H 0.6182 0.0434 0.6525 0.077 Uiso 1 1 calc R . . 
H28B H 0.6399 0.1150 0.6860 0.077 Uiso 1 1 calc R . . 
H28C H 0.5911 0.1256 0.6460 0.077 Uiso 1 1 calc R . . 
C29 C 0.50016(15) 0.0656(3) 0.69120(16) 0.0584(10) Uani 1 1 d . . . 
H29A H 0.4861 0.1025 0.7107 0.070 Uiso 1 1 calc R . . 
H29C H 0.4855 0.0143 0.6930 0.070 Uiso 1 1 calc R . . 
H29B H 0.4936 0.0832 0.6578 0.070 Uiso 1 1 calc R . . 
C30 C 0.38553(14) 0.5867(2) 0.37520(14) 0.0502(10) Uani 1 1 d . . . 
H30A H 0.3505 0.5753 0.3671 0.075 Uiso 1 1 calc R . . 
H30B H 0.3907 0.6427 0.3723 0.075 Uiso 1 1 calc R . . 
H30C H 0.3988 0.5702 0.4082 0.075 Uiso 1 1 calc R . . 
C31 C 0.49339(14) 0.5602(3) 0.33638(15) 0.0560(10) Uani 1 1 d . . . 
H31A H 0.5078 0.5236 0.3169 0.084 Uiso 1 1 calc R . . 
H31B H 0.5109 0.5570 0.3698 0.084 Uiso 1 1 calc R . . 
H31C H 0.4959 0.6131 0.3244 0.084 Uiso 1 1 calc R . . 
N1 N -0.00545(12) 0.81451(18) 0.22532(12) 0.0498(7) Uani 1 1 d . . . 
N2 N 0.02519(12) 0.74891(18) -0.24907(12) 0.0469(7) Uani 1 1 d . . . 
N3 N 0.23573(10) 0.28009(15) 0.00520(10) 0.0379(6) Uani 1 1 d . . . 
O1 O 0.18374(8) 0.77450(13) 0.12591(8) 0.0367(5) Uani 1 1 d . . . 
O2 O 0.11988(9) 0.77635(14) 0.06337(9) 0.0427(5) Uani 1 1 d . . . 
O3 O 0.16151(8) 0.75384(12) -0.03516(8) 0.0343(5) Uani 1 1 d . . . 
O4 O 0.21629(8) 0.74731(11) -0.08611(8) 0.0344(5) Uani 1 1 d . . . 
O5 O 0.24664(8) 0.64958(13) 0.00293(8) 0.0379(5) Uani 1 1 d . . . 
O6 O 0.29782(7) 0.62270(13) -0.04618(7) 0.0336(5) Uani 1 1 d . . . 
O7 O 0.22318(8) 0.62734(12) 0.10243(7) 0.0328(5) Uani 1 1 d . . . 
O8 O 0.14030(8) 0.62749(13) 0.02646(8) 0.0379(5) Uani 1 1 d . . . 
O9 O 0.23331(9) 0.42949(15) 0.28809(9) 0.0505(7) Uani 1 1 d . . . 
O10 O 0.57871(8) -0.02604(14) 0.72120(8) 0.0391(5) Uani 1 1 d . . . 
O11 O 0.38558(9) 0.56417(15) 0.28512(9) 0.0460(6) Uani 1 1 d . . . 
O12 O 0.3986(2) 0.1177(3) 0.1630(2) 0.0482(16) Uani 0.40 1 d P . . 
H12D H 0.3819 0.1606 0.1595 0.058 Uiso 0.40 1 d PR . . 
H12A H 0.3938 0.0933 0.1883 0.058 Uiso 0.40 1 d PR . . 
O13 O 0.4359(3) 0.1404(4) 0.1144(2) 0.0569(18) Uani 0.40 1 d P . . 
H13B H 0.4273 0.1612 0.0862 0.068 Uiso 0.40 1 d PR . . 
H13C H 0.4488 0.1757 0.1349 0.068 Uiso 0.40 1 d PR . . 
O14 O 0.1410(3) 0.7490(4) 0.4292(2) 0.0571(18) Uani 0.40 1 d P . . 
H14C H 0.1501 0.7881 0.4139 0.068 Uiso 0.40 1 d PR . . 
H14D H 0.1104 0.7388 0.4175 0.068 Uiso 0.40 1 d PR . . 
O15 O 0.1758(2) 0.5674(3) 0.8958(3) 0.0521(17) Uani 0.40 1 d P . . 
H15B H 0.1684 0.5491 0.9218 0.062 Uiso 0.40 1 d PR . . 
H15C H 0.1501 0.5671 0.8728 0.062 Uiso 0.40 1 d PR . . 
O16 O 0.4879(2) 0.3886(4) 0.4885(2) 0.0530(16) Uani 0.40 1 d P . . 
H16A H 0.5156 0.3692 0.4848 0.064 Uiso 0.40 1 d PR . . 
H16B H 0.4920 0.4114 0.5162 0.064 Uiso 0.40 1 d PR . . 
O17 O 0.6364(3) 0.5522(3) 0.8588(2) 0.0512(16) Uani 0.40 1 d P . . 
H17C H 0.6446 0.5106 0.8758 0.061 Uiso 0.40 1 d PR . . 
H17E H 0.6143 0.5775 0.8700 0.061 Uiso 0.40 1 d PR . . 
O18 O 0.2274(2) 0.3643(4) 0.8162(2) 0.0496(16) Uani 0.40 1 d P . . 
H18B H 0.2188 0.3679 0.8437 0.059 Uiso 0.40 1 d PR . . 
H18C H 0.2089 0.3944 0.7956 0.059 Uiso 0.40 1 d PR . . 
O19 O 0.2451(3) 0.2426(5) 0.8622(3) 0.057(3) Uani 0.30 1 d P . . 
H19A H 0.2176 0.2197 0.8626 0.069 Uiso 0.30 1 d PR . . 
H19C H 0.2606 0.2514 0.8914 0.069 Uiso 0.30 1 d PR . . 
O20 O 0.0721(3) 0.0286(5) 0.4740(3) 0.0389(18) Uani 0.30 1 d P . . 
H20B H 0.0706 -0.0218 0.4736 0.047 Uiso 0.30 1 d PR . . 
H20C H 0.0428 0.0476 0.4654 0.047 Uiso 0.30 1 d PR . . 
O21 O 0.4088(3) 0.8193(5) 0.4488(3) 0.0412(18) Uani 0.30 1 d P . . 
H21D H 0.3874 0.8165 0.4220 0.049 Uiso 0.30 1 d PR . . 
H21A H 0.3945 0.8346 0.4715 0.049 Uiso 0.30 1 d PR . . 
O22 O 0.4526(3) 0.7198(5) 0.4500(3) 0.053(2) Uani 0.30 1 d P . . 
H22D H 0.4746 0.7202 0.4764 0.063 Uiso 0.30 1 d PR . . 
H22E H 0.4344 0.6787 0.4494 0.063 Uiso 0.30 1 d PR . . 
S1 S 0.19671(3) 0.59974(4) 0.14196(3) 0.03555(17) Uani 1 1 d . . . 
S2 S 0.08763(3) 0.63057(5) 0.00149(3) 0.03457(18) Uani 1 1 d . . . 
S3 S 0.23767(3) 0.39316(6) 0.23880(3) 0.0481(2) Uani 1 1 d . . . 
S4 S 0.57126(4) 0.05902(5) 0.71547(3) 0.0459(2) Uani 1 1 d . . . 
S5 S 0.41817(3) 0.53146(5) 0.33198(3) 0.03695(19) Uani 1 1 d . . . 
 
loop_ 
 _atom_site_aniso_label 
 _atom_site_aniso_U_11 
 _atom_site_aniso_U_22 
 _atom_site_aniso_U_33 
 _atom_site_aniso_U_23 
 _atom_site_aniso_U_13 
 _atom_site_aniso_U_12 
C1 0.045(2) 0.0431(19) 0.0377(18) -0.0066(15) 0.0094(15) -0.0019(15) 
C2 0.0486(19) 0.0215(14) 0.050(2) -0.0015(14) 0.0082(16) 0.0201(13) 
C3 0.051(2) 0.0372(17) 0.0374(18) -0.0003(14) 0.0181(16) -0.0164(15) 
C4 0.0471(18) 0.0392(17) 0.0253(15) 0.0104(13) 0.0148(14) 0.0070(14) 
C5 0.0439(19) 0.048(2) 0.049(2) 0.0029(17) 0.0170(16) -0.0008(16) 
C6 0.0378(18) 0.0363(17) 0.047(2) 0.0075(15) 0.0080(15) 0.0120(14) 
C7 0.0437(18) 0.0359(17) 0.0396(18) -0.0166(15) 0.0147(14) -0.0178(14) 
C8 0.0435(18) 0.0165(13) 0.0382(18) -0.0063(12) 0.0103(14) -0.0011(12) 
C9 0.0371(17) 0.0355(16) 0.0404(19) -0.0055(14) 0.0044(14) -0.0049(13) 
C10 0.049(2) 0.0385(17) 0.0277(17) 0.0072(13) 0.0083(14) 0.0031(14) 
C11 0.050(2) 0.0352(17) 0.047(2) 0.0149(15) -0.0016(16) -0.0079(15) 
C12 0.051(2) 0.0347(17) 0.041(2) 0.0121(14) 0.0014(16) -0.0011(15) 
C13 0.052(2) 0.0344(17) 0.0310(17) 0.0036(13) -0.0030(15) -0.0076(14) 
C14 0.0376(17) 0.0272(14) 0.0325(17) 0.0066(12) -0.0108(13) -0.0014(12) 
Eu1 0.03484(9) 0.03119(9) 0.02605(9) -0.00336(6) 0.00555(6) -0.01129(6) 
C15 0.0348(16) 0.0312(15) 0.0261(15) -0.0034(12) 0.0056(12) -0.0113(12) 
C16 0.0362(17) 0.0365(17) 0.0428(18) 0.0030(15) 0.0178(14) -0.0050(13) 
C17 0.0403(18) 0.0472(19) 0.0337(17) -0.0019(14) 0.0175(14) -0.0055(14) 
C18 0.058(2) 0.044(2) 0.048(2) -0.0018(17) 0.0140(18) 0.0003(17) 
C19 0.0376(18) 0.0288(15) 0.0429(19) -0.0035(13) 0.0063(14) -0.0038(13) 
C20 0.0469(19) 0.0465(19) 0.049(2) -0.0264(16) 0.0312(17) -0.0176(15) 
C21 0.0239(14) 0.0518(19) 0.0309(16) -0.0018(14) 0.0081(12) -0.0024(13) 
C22 0.049(2) 0.0282(16) 0.048(2) 0.0055(15) -0.0039(16) -0.0064(14) 
C23 0.047(2) 0.0447(19) 0.043(2) -0.0079(16) 0.0168(16) -0.0071(15) 
C24 0.0336(17) 0.0309(16) 0.050(2) 0.0196(15) 0.0033(14) -0.0009(13) 
C25 0.0473(19) 0.0268(15) 0.0297(16) 0.0013(12) 0.0118(14) -0.0013(13) 
C26 0.053(2) 0.053(2) 0.052(2) 0.0008(18) 0.0159(18) 0.0217(18) 
C27 0.051(2) 0.058(2) 0.043(2) -0.0184(17) 0.0250(17) 0.0148(17) 
C28 0.053(2) 0.057(2) 0.045(2) 0.0119(18) 0.0126(17) -0.0095(18) 
C29 0.053(2) 0.064(3) 0.050(2) -0.017(2) -0.0067(18) 0.0023(19) 
C30 0.057(2) 0.053(2) 0.047(2) -0.0065(17) 0.0260(18) 0.0324(18) 
C31 0.044(2) 0.068(3) 0.050(2) -0.022(2) -0.0030(17) 0.0246(18) 
N1 0.0557(18) 0.0472(17) 0.0521(18) -0.0071(14) 0.0241(16) -0.0036(15) 
N2 0.0434(16) 0.0505(17) 0.0471(18) 0.0095(14) 0.0099(14) -0.0060(13) 
N3 0.0338(14) 0.0313(13) 0.0431(16) -0.0151(12) -0.0049(12) 0.0031(11) 
O1 0.0327(12) 0.0404(12) 0.0400(12) -0.0064(10) 0.0145(10) -0.0108(9) 
O2 0.0353(12) 0.0518(14) 0.0412(14) 0.0097(11) 0.0086(10) -0.0052(10) 
O3 0.0391(12) 0.0310(11) 0.0310(12) -0.0082(9) 0.0028(9) -0.0068(9) 
O4 0.0395(13) 0.0193(9) 0.0425(13) -0.0065(9) 0.0038(10) -0.0061(8) 
O5 0.0381(13) 0.0364(12) 0.0403(13) -0.0026(10) 0.0107(10) -0.0110(9) 
O6 0.0374(12) 0.0341(11) 0.0285(11) -0.0032(9) 0.0052(9) -0.0108(9) 
O7 0.0406(12) 0.0299(11) 0.0274(11) -0.0069(9) 0.0058(9) -0.0125(9) 
O8 0.0326(11) 0.0398(12) 0.0419(13) -0.0024(10) 0.0095(10) -0.0119(9) 
O9 0.0445(14) 0.0479(14) 0.0451(14) 0.0259(11) -0.0238(11) -0.0032(11) 
O10 0.0393(12) 0.0474(13) 0.0274(11) 0.0041(10) -0.0004(9) 0.0081(10) 
O11 0.0508(14) 0.0497(14) 0.0384(13) -0.0061(11) 0.0114(11) 0.0117(11) 
O12 0.043(3) 0.039(3) 0.061(4) -0.007(3) 0.009(3) 0.031(3) 
O13 0.079(5) 0.060(4) 0.030(3) 0.004(3) 0.008(3) -0.028(4) 
O14 0.079(5) 0.052(4) 0.039(4) 0.017(3) 0.009(3) 0.005(3) 
O15 0.041(3) 0.031(3) 0.081(5) -0.006(3) 0.007(3) 0.004(3) 
O16 0.050(4) 0.057(4) 0.043(4) -0.003(3) -0.012(3) 0.019(3) 
O17 0.064(4) 0.030(3) 0.057(4) 0.010(3) 0.006(3) 0.000(3) 
O18 0.055(4) 0.060(4) 0.032(3) -0.005(3) 0.003(3) 0.024(3) 
O19 0.036(5) 0.074(6) 0.048(5) -0.029(4) -0.023(4) 0.013(4) 
O20 0.038(4) 0.049(4) 0.035(4) -0.029(3) 0.018(3) 0.002(3) 
O21 0.028(4) 0.053(5) 0.039(4) -0.017(4) -0.002(3) -0.014(3) 
O22 0.060(5) 0.042(4) 0.055(5) 0.034(4) 0.010(4) -0.004(4) 
S1 0.0452(4) 0.0256(4) 0.0386(4) -0.0076(3) 0.0151(3) 0.0001(3) 
S2 0.0279(4) 0.0346(4) 0.0453(5) -0.0116(3) 0.0171(3) -0.0100(3) 
S3 0.0490(5) 0.0520(5) 0.0446(5) -0.0233(4) 0.0128(4) 0.0143(4) 
S4 0.0527(5) 0.0357(4) 0.0418(5) 0.0128(4) -0.0077(4) 0.0006(4) 
S5 0.0328(4) 0.0455(4) 0.0382(4) 0.0088(3) 0.0205(3) 0.0155(3) 
 
_geom_special_details 
; 
 All esds (except the esd in the dihedral angle between two l.s. planes) 
 are estimated using the full covariance matrix.  The cell esds are taken 
 into account individually in the estimation of esds in distances, angles 
 and torsion angles; correlations between esds in cell parameters are only 
 used when they are defined by crystal symmetry.  An approximate (isotropic) 
 treatment of cell esds is used for estimating esds involving l.s. planes. 
; 
 
loop_ 
 _geom_bond_atom_site_label_1 
 _geom_bond_atom_site_label_2 
 _geom_bond_distance 
 _geom_bond_site_symmetry_2 
 _geom_bond_publ_flag 
C1 O1 1.221(4) . ? 
C1 O2 1.309(4) . ? 
C1 C2 1.488(5) . ? 
C1 Eu1 2.842(3) . ? 
C2 C7 1.391(5) . ? 
C2 C3 1.414(5) . ? 
C3 C4 1.396(4) . ? 
C3 H3 0.9300 . ? 
C4 C5 1.383(5) . ? 
C4 H4 0.9300 . ? 
C5 N1 1.399(4) . ? 
C5 C6 1.419(5) . ? 
C6 C7 1.372(5) . ? 
C6 H6 0.9300 . ? 
C7 H7 0.9300 . ? 
C8 O3 1.264(4) . ? 
C8 O4 1.276(4) . ? 
C8 C9 1.486(5) . ? 
C9 C10 1.382(5) . ? 
C9 C14 1.396(5) . ? 
C10 C11 1.366(5) . ? 
C10 H10 0.9300 . ? 
C11 C12 1.322(5) . ? 
C11 H11 0.9300 . ? 
C12 N2 1.399(5) . ? 
C12 C13 1.407(5) . ? 
C13 C14 1.432(5) . ? 
C13 H13 0.9300 . ? 
C14 H14 0.9300 . ? 
Eu1 O3 2.332(2) . ? 
Eu1 O4 2.338(2) 7_565 ? 
Eu1 O5 2.364(2) . ? 
Eu1 O7 2.364(2) . ? 
Eu1 O8 2.415(2) . ? 
Eu1 O6 2.444(2) 7_565 ? 
Eu1 O1 2.476(2) . ? 
Eu1 O2 2.487(2) . ? 
Eu1 O5 2.950(2) 7_565 ? 
Eu1 C15 3.048(3) 7_565 ? 
Eu1 S1 3.5090(9) . ? 
C15 O5 1.210(4) . ? 
C15 O6 1.280(3) . ? 
C15 C16 1.467(4) . ? 
C15 Eu1 3.048(3) 7_565 ? 
C16 C17 1.405(5) . ? 
C16 C21 1.425(4) . ? 
C17 C18 1.380(5) . ? 
C17 H17 0.9300 . ? 
C18 C19 1.441(5) . ? 
C18 H18 0.9300 . ? 
C19 N3 1.321(4) . ? 
C19 C20 1.333(4) . ? 
C20 C21 1.376(5) . ? 
C20 H20 0.9300 . ? 
C21 H21 0.9300 . ? 
C22 S1 1.762(3) . ? 
C22 H22B 0.9600 . ? 
C22 H22C 0.9600 . ? 
C22 H22A 0.9600 . ? 
C23 S1 1.798(4) . ? 
C23 H23A 0.9600 . ? 
C23 H23B 0.9600 . ? 
C23 H23C 0.9600 . ? 
C24 S2 1.843(3) . ? 
C24 H24A 0.9600 . ? 
C24 H24B 0.9600 . ? 
C24 H24C 0.9600 . ? 
C25 S2 1.837(3) . ? 
C25 H25A 0.9600 . ? 
C25 H25B 0.9600 . ? 
C25 H25C 0.9600 . ? 
C26 S3 2.067(4) . ? 
C26 H26A 0.9600 . ? 
C26 H26C 0.9600 . ? 
C26 H26B 0.9600 . ? 
C27 S3 1.665(4) . ? 
C27 H27A 0.9600 . ? 
C27 H27C 0.9600 . ? 
C27 H27B 0.9600 . ? 
C28 S4 1.901(4) . ? 
C28 H28A 0.9600 . ? 
C28 H28B 0.9600 . ? 
C28 H28C 0.9600 . ? 
C29 S4 1.932(4) . ? 
C29 H29A 0.9600 . ? 
C29 H29C 0.9600 . ? 
C29 H29B 0.9600 . ? 
C30 S5 1.890(3) . ? 
C30 H30A 0.9600 . ? 
C30 H30B 0.9600 . ? 
C30 H30C 0.9600 . ? 
C31 S5 2.099(4) . ? 
C31 H31A 0.9600 . ? 
C31 H31B 0.9600 . ? 
C31 H31C 0.9600 . ? 
N1 N1 1.349(6) 2 ? 
N2 N2 1.372(6) 2_554 ? 
N3 N3 1.350(5) 7 ? 
O4 Eu1 2.338(2) 7_565 ? 
O5 Eu1 2.950(2) 7_565 ? 
O6 Eu1 2.444(2) 7_565 ? 
O7 S1 1.514(2) . ? 
O8 S2 1.471(2) . ? 
O9 S3 1.533(3) . ? 
O10 S4 1.453(2) . ? 
O11 S5 1.528(3) . ? 
O12 H12D 0.8519 . ? 
O12 H12A 0.8507 . ? 
O13 H13B 0.8506 . ? 
O13 H13C 0.8511 . ? 
O14 H14C 0.8514 . ? 
O14 H14D 0.8522 . ? 
O15 H15B 0.8506 . ? 
O15 H15C 0.8514 . ? 
O16 H16A 0.8521 . ? 
O16 H16B 0.8502 . ? 
O17 H17C 0.8512 . ? 
O17 H17E 0.8518 . ? 
O18 H18B 0.8506 . ? 
O18 H18C 0.8514 . ? 
O19 H19A 0.8520 . ? 
O19 H19C 0.8506 . ? 
O20 H20B 0.8519 . ? 
O20 H20C 0.8521 . ? 
O21 H21D 0.8511 . ? 
O21 H21A 0.8509 . ? 
O22 H22D 0.8511 . ? 
O22 H22E 0.8521 . ? 
 
loop_ 
 _geom_angle_atom_site_label_1 
 _geom_angle_atom_site_label_2 
 _geom_angle_atom_site_label_3 
 _geom_angle 
 _geom_angle_site_symmetry_1 
 _geom_angle_site_symmetry_3 
 _geom_angle_publ_flag 
O1 C1 O2 121.2(3) . . ? 
O1 C1 C2 126.5(3) . . ? 
O2 C1 C2 112.2(3) . . ? 
O1 C1 Eu1 60.34(17) . . ? 
O2 C1 Eu1 61.03(17) . . ? 
C2 C1 Eu1 172.2(3) . . ? 
C7 C2 C3 118.6(3) . . ? 
C7 C2 C1 122.8(3) . . ? 
C3 C2 C1 113.8(3) . . ? 
C4 C3 C2 118.6(3) . . ? 
C4 C3 H3 120.7 . . ? 
C2 C3 H3 120.7 . . ? 
C5 C4 C3 120.1(3) . . ? 
C5 C4 H4 119.9 . . ? 
C3 C4 H4 119.9 . . ? 
C4 C5 N1 124.6(3) . . ? 
C4 C5 C6 121.5(3) . . ? 
N1 C5 C6 113.8(3) . . ? 
C7 C6 C5 117.0(3) . . ? 
C7 C6 H6 121.5 . . ? 
C5 C6 H6 121.5 . . ? 
C6 C7 C2 122.4(3) . . ? 
C6 C7 H7 118.8 . . ? 
C2 C7 H7 118.8 . . ? 
O3 C8 O4 127.2(3) . . ? 
O3 C8 C9 122.4(3) . . ? 
O4 C8 C9 110.5(3) . . ? 
C10 C9 C14 119.9(3) . . ? 
C10 C9 C8 119.0(3) . . ? 
C14 C9 C8 121.0(3) . . ? 
C11 C10 C9 122.2(3) . . ? 
C11 C10 H10 118.9 . . ? 
C9 C10 H10 118.9 . . ? 
C12 C11 C10 118.5(4) . . ? 
C12 C11 H11 120.7 . . ? 
C10 C11 H11 120.7 . . ? 
C11 C12 N2 123.9(4) . . ? 
C11 C12 C13 123.9(3) . . ? 
N2 C12 C13 112.1(3) . . ? 
C12 C13 C14 117.3(3) . . ? 
C12 C13 H13 121.3 . . ? 
C14 C13 H13 121.3 . . ? 
C9 C14 C13 118.0(3) . . ? 
C9 C14 H14 121.0 . . ? 
C13 C14 H14 121.0 . . ? 
O3 Eu1 O4 130.79(8) . 7_565 ? 
O3 Eu1 O5 77.58(8) . . ? 
O4 Eu1 O5 76.52(7) 7_565 . ? 
O3 Eu1 O7 140.15(7) . . ? 
O4 Eu1 O7 72.59(7) 7_565 . ? 
O5 Eu1 O7 78.82(7) . . ? 
O3 Eu1 O8 74.44(8) . . ? 
O4 Eu1 O8 140.54(7) 7_565 . ? 
O5 Eu1 O8 82.22(7) . . ? 
O7 Eu1 O8 70.90(7) . . ? 
O3 Eu1 O6 81.32(7) . 7_565 ? 
O4 Eu1 O6 80.92(7) 7_565 7_565 ? 
O5 Eu1 O6 125.68(7) . 7_565 ? 
O7 Eu1 O6 138.35(7) . 7_565 ? 
O8 Eu1 O6 137.79(7) . 7_565 ? 
O3 Eu1 O1 133.93(8) . . ? 
O4 Eu1 O1 82.81(8) 7_565 . ? 
O5 Eu1 O1 147.98(8) . . ? 
O7 Eu1 O1 71.74(7) . . ? 
O8 Eu1 O1 99.39(7) . . ? 
O6 Eu1 O1 73.56(7) 7_565 . ? 
O3 Eu1 O2 83.49(8) . . ? 
O4 Eu1 O2 133.08(8) 7_565 . ? 
O5 Eu1 O2 149.77(8) . . ? 
O7 Eu1 O2 102.24(7) . . ? 
O8 Eu1 O2 70.04(8) . . ? 
O6 Eu1 O2 73.34(7) 7_565 . ? 
O1 Eu1 O2 52.75(8) . . ? 
O3 Eu1 C1 110.15(9) . . ? 
O4 Eu1 C1 107.45(9) 7_565 . ? 
O5 Eu1 C1 161.75(9) . . ? 
O7 Eu1 C1 85.36(9) . . ? 
O8 Eu1 C1 84.06(9) . . ? 
O6 Eu1 C1 72.46(9) 7_565 . ? 
O1 Eu1 C1 25.37(9) . . ? 
O2 Eu1 C1 27.41(9) . . ? 
O3 Eu1 O5 67.51(7) . 7_565 ? 
O4 Eu1 O5 66.80(7) 7_565 7_565 ? 
O5 Eu1 O5 78.63(8) . 7_565 ? 
O7 Eu1 O5 137.00(7) . 7_565 ? 
O8 Eu1 O5 140.17(7) . 7_565 ? 
O6 Eu1 O5 47.05(6) 7_565 7_565 ? 
O1 Eu1 O5 115.19(6) . 7_565 ? 
O2 Eu1 O5 115.44(7) . 7_565 ? 
C1 Eu1 O5 119.49(8) . 7_565 ? 
O3 Eu1 C15 73.54(8) . 7_565 ? 
O4 Eu1 C15 71.84(8) 7_565 7_565 ? 
O5 Eu1 C15 101.82(8) . 7_565 ? 
O7 Eu1 C15 143.14(8) . 7_565 ? 
O8 Eu1 C15 145.95(8) . 7_565 ? 
O6 Eu1 C15 23.86(7) 7_565 7_565 ? 
O1 Eu1 C15 94.50(7) . 7_565 ? 
O2 Eu1 C15 95.02(8) . 7_565 ? 
C1 Eu1 C15 96.29(9) . 7_565 ? 
O5 Eu1 C15 23.20(7) 7_565 7_565 ? 
O3 Eu1 S1 139.35(5) . . ? 
O4 Eu1 S1 84.88(6) 7_565 . ? 
O5 Eu1 S1 96.71(6) . . ? 
O7 Eu1 S1 19.80(5) . . ? 
O8 Eu1 S1 64.91(6) . . ? 
O6 Eu1 S1 129.72(5) 7_565 . ? 
O1 Eu1 S1 56.87(5) . . ? 
O2 Eu1 S1 82.52(5) . . ? 
C1 Eu1 S1 66.44(8) . . ? 
O5 Eu1 S1 151.65(5) 7_565 . ? 
C15 Eu1 S1 145.62(6) 7_565 . ? 
O5 C15 O6 124.4(3) . . ? 
O5 C15 C16 117.7(3) . . ? 
O6 C15 C16 117.9(3) . . ? 
O5 C15 Eu1 73.88(17) . 7_565 ? 
O6 C15 Eu1 50.58(14) . 7_565 ? 
C16 C15 Eu1 168.5(2) . 7_565 ? 
C17 C16 C21 120.2(3) . . ? 
C17 C16 C15 117.1(3) . . ? 
C21 C16 C15 122.7(3) . . ? 
C18 C17 C16 118.0(3) . . ? 
C18 C17 H17 121.0 . . ? 
C16 C17 H17 121.0 . . ? 
C17 C18 C19 121.6(3) . . ? 
C17 C18 H18 119.2 . . ? 
C19 C18 H18 119.2 . . ? 
N3 C19 C20 118.2(3) . . ? 
N3 C19 C18 123.1(3) . . ? 
C20 C19 C18 118.3(3) . . ? 
C19 C20 C21 123.0(3) . . ? 
C19 C20 H20 118.5 . . ? 
C21 C20 H20 118.5 . . ? 
C20 C21 C16 118.9(3) . . ? 
C20 C21 H21 120.6 . . ? 
C16 C21 H21 120.6 . . ? 
S1 C22 H22B 109.5 . . ? 
S1 C22 H22C 109.5 . . ? 
H22B C22 H22C 109.5 . . ? 
S1 C22 H22A 109.5 . . ? 
H22B C22 H22A 109.5 . . ? 
H22C C22 H22A 109.5 . . ? 
S1 C23 H23A 109.5 . . ? 
S1 C23 H23B 109.5 . . ? 
H23A C23 H23B 109.5 . . ? 
S1 C23 H23C 109.5 . . ? 
H23A C23 H23C 109.5 . . ? 
H23B C23 H23C 109.5 . . ? 
S2 C24 H24A 109.5 . . ? 
S2 C24 H24B 109.5 . . ? 
H24A C24 H24B 109.5 . . ? 
S2 C24 H24C 109.5 . . ? 
H24A C24 H24C 109.5 . . ? 
H24B C24 H24C 109.5 . . ? 
S2 C25 H25A 109.5 . . ? 
S2 C25 H25B 109.5 . . ? 
H25A C25 H25B 109.5 . . ? 
S2 C25 H25C 109.5 . . ? 
H25A C25 H25C 109.5 . . ? 
H25B C25 H25C 109.5 . . ? 
S3 C26 H26A 109.5 . . ? 
S3 C26 H26C 109.5 . . ? 
H26A C26 H26C 109.5 . . ? 
S3 C26 H26B 109.5 . . ? 
H26A C26 H26B 109.5 . . ? 
H26C C26 H26B 109.5 . . ? 
S3 C27 H27A 109.5 . . ? 
S3 C27 H27C 109.5 . . ? 
H27A C27 H27C 109.5 . . ? 
S3 C27 H27B 109.5 . . ? 
H27A C27 H27B 109.5 . . ? 
H27C C27 H27B 109.5 . . ? 
S4 C28 H28A 109.5 . . ? 
S4 C28 H28B 109.5 . . ? 
H28A C28 H28B 109.5 . . ? 
S4 C28 H28C 109.5 . . ? 
H28A C28 H28C 109.5 . . ? 
H28B C28 H28C 109.5 . . ? 
S4 C29 H29A 109.5 . . ? 
S4 C29 H29C 109.5 . . ? 
H29A C29 H29C 109.5 . . ? 
S4 C29 H29B 109.5 . . ? 
H29A C29 H29B 109.5 . . ? 
H29C C29 H29B 109.5 . . ? 
S5 C30 H30A 109.5 . . ? 
S5 C30 H30B 109.5 . . ? 
H30A C30 H30B 109.5 . . ? 
S5 C30 H30C 109.5 . . ? 
H30A C30 H30C 109.5 . . ? 
H30B C30 H30C 109.5 . . ? 
S5 C31 H31A 109.5 . . ? 
S5 C31 H31B 109.5 . . ? 
H31A C31 H31B 109.5 . . ? 
S5 C31 H31C 109.5 . . ? 
H31A C31 H31C 109.5 . . ? 
H31B C31 H31C 109.5 . . ? 
N1 N1 C5 120.3(4) 2 . ? 
N2 N2 C12 121.9(4) 2_554 . ? 
C19 N3 N3 124.6(4) . 7 ? 
C1 O1 Eu1 94.3(2) . . ? 
C1 O2 Eu1 91.6(2) . . ? 
C8 O3 Eu1 137.5(2) . . ? 
C8 O4 Eu1 138.8(2) . 7_565 ? 
C15 O5 Eu1 175.31(19) . . ? 
C15 O5 Eu1 82.92(17) . 7_565 ? 
Eu1 O5 Eu1 101.37(8) . 7_565 ? 
C15 O6 Eu1 105.55(18) . 7_565 ? 
S1 O7 Eu1 128.27(13) . . ? 
S2 O8 Eu1 130.29(13) . . ? 
H12D O12 H12A 109.5 . . ? 
H13B O13 H13C 109.4 . . ? 
H14C O14 H14D 109.5 . . ? 
H15B O15 H15C 109.4 . . ? 
H16A O16 H16B 109.5 . . ? 
H17C O17 H17E 109.6 . . ? 
H18B O18 H18C 109.4 . . ? 
H19A O19 H19C 109.5 . . ? 
H20B O20 H20C 109.5 . . ? 
H21D O21 H21A 109.3 . . ? 
H22D O22 H22E 109.5 . . ? 
O7 S1 C22 98.54(15) . . ? 
O7 S1 C23 105.63(14) . . ? 
C22 S1 C23 109.86(17) . . ? 
C22 S1 Eu1 120.71(12) . . ? 
C23 S1 Eu1 113.32(12) . . ? 
O8 S2 C25 99.49(14) . . ? 
O8 S2 C24 104.98(14) . . ? 
C25 S2 C24 103.90(15) . . ? 
O9 S3 C27 103.63(15) . . ? 
O9 S3 C26 111.38(16) . . ? 
C27 S3 C26 106.44(16) . . ? 
O10 S4 C28 104.86(17) . . ? 
O10 S4 C29 101.79(17) . . ? 
C28 S4 C29 114.23(19) . . ? 
O11 S5 C30 95.63(15) . . ? 
O11 S5 C31 111.23(16) . . ? 
C30 S5 C31 116.01(17) . . ? 
 
_diffrn_measured_fraction_theta_max    0.998 
_diffrn_reflns_theta_full              26.00 
_diffrn_measured_fraction_theta_full   0.998 
_refine_diff_density_max    0.644 
_refine_diff_density_min   -0.815 
_refine_diff_density_rms    0.063 

#===END


data_10Gd
_database_code_depnum_ccdc_archive 'CCDC 745294'
_audit_creation_method           SHELXL-2000
_chemical_name_systematic        
;
?
; 
_chemical_name_common             ? 
_chemical_melting_point           ? 
_chemical_formula_moiety          ? 
_chemical_formula_sum 
 'C31 H50 Gd N3 O15 S5' 
_chemical_formula_weight          1022.29 
 
loop_ 
 _atom_type_symbol 
 _atom_type_description 
 _atom_type_scat_dispersion_real 
 _atom_type_scat_dispersion_imag 
 _atom_type_scat_source 
 'C'  'C'   0.0033   0.0016 
 'International Tables Vol C Tables 4.2.6.8 and 6.1.1.4' 
 'H'  'H'   0.0000   0.0000 
 'International Tables Vol C Tables 4.2.6.8 and 6.1.1.4' 
 'N'  'N'   0.0061   0.0033 
 'International Tables Vol C Tables 4.2.6.8 and 6.1.1.4' 
 'O'  'O'   0.0106   0.0060 
 'International Tables Vol C Tables 4.2.6.8 and 6.1.1.4' 
 'S'  'S'   0.1246   0.1234 
 'International Tables Vol C Tables 4.2.6.8 and 6.1.1.4' 
 'Gd'  'Gd'  -0.1653   3.9035 
 'International Tables Vol C Tables 4.2.6.8 and 6.1.1.4' 
 
_symmetry_cell_setting           'Monoclinic'
_symmetry_space_group_name_H-M   'C2/c  '
_symmetry_space_group_name_Hall   '-C 2yc'
 
loop_ 
 _symmetry_equiv_pos_as_xyz 
 'x, y, z' 
 '-x, y, -z+1/2' 
 'x+1/2, y+1/2, z' 
 '-x+1/2, y+1/2, -z+1/2' 
 '-x, -y, -z' 
 'x, -y, z-1/2' 
 '-x+1/2, -y+1/2, -z' 
 'x+1/2, -y+1/2, z-1/2' 
 
_cell_length_a                    27.367(3) 
_cell_length_b                    16.8285(15) 
_cell_length_c                    27.915(3) 
_cell_angle_alpha                 90.00 
_cell_angle_beta                  101.892(2) 
_cell_angle_gamma                 90.00 
_cell_volume                      12580(2) 
_cell_formula_units_Z             8 
_cell_measurement_temperature     291(2) 
_cell_measurement_reflns_used     2785
_cell_measurement_theta_min       2.11 
_cell_measurement_theta_max       25.42 
 
_exptl_crystal_description        block 
_exptl_crystal_colour             red 
_exptl_crystal_size_max           0.30
_exptl_crystal_size_mid           0.26 
_exptl_crystal_size_min           0.24 
_exptl_crystal_density_meas       ? 
_exptl_crystal_density_diffrn     1.080 
_exptl_crystal_density_method     'not measured' 
_exptl_crystal_F_000              4168 
_exptl_absorpt_coefficient_mu     1.265 
_exptl_absorpt_correction_type    'multi-scan'
_exptl_absorpt_correction_T_min   0.69
_exptl_absorpt_correction_T_max   0.74 
_exptl_absorpt_process_details    'SADABS; Bruker, 2000' 
 
_exptl_special_details 
; 
 ? 
; 
 
_diffrn_ambient_temperature       291(2) 
_diffrn_radiation_wavelength      0.71073 
_diffrn_radiation_type           'MoK\a'
_diffrn_radiation_source         'sealed tube'
_diffrn_radiation_monochromator  'graphite'
_diffrn_measurement_device_type  'Bruker Smart Apex CCD '
_diffrn_measurement_method       'phi and omega scans'
_diffrn_detector_area_resol_mean  ? 
_diffrn_standards_number          ? 
_diffrn_standards_interval_count  ? 
_diffrn_standards_interval_time   ? 
_diffrn_standards_decay_%         ? 
_diffrn_reflns_number             33506 
_diffrn_reflns_av_R_equivalents   0.0404 
_diffrn_reflns_av_sigmaI/netI     0.0726 
_diffrn_reflns_limit_h_min        -33 
_diffrn_reflns_limit_h_max        22 
_diffrn_reflns_limit_k_min        -19 
_diffrn_reflns_limit_k_max        20 
_diffrn_reflns_limit_l_min        -34 
_diffrn_reflns_limit_l_max        33 
_diffrn_reflns_theta_min          1.54 
_diffrn_reflns_theta_max          26.00 
_reflns_number_total              12327 
_reflns_number_gt                 9285 
_reflns_threshold_expression      >2sigma(I) 
 
_computing_data_collection      'SMART (Bruker, 2000)'
_computing_cell_refinement      'SMART'
_computing_data_reduction       'SAINT (Bruker, 2000)'
_computing_structure_solution   'SHELXTL (Bruker, 2000)'
_computing_structure_refinement 'SHELXTL'
_computing_molecular_graphics   'SHELXTL'
_computing_publication_material 'SHELXTL'

 
_refine_special_details 
; 
 Refinement of F^2^ against ALL reflections.  The weighted R-factor wR and 
 goodness of fit S are based on F^2^, conventional R-factors R are based 
 on F, with F set to zero for negative F^2^. The threshold expression of 
 F^2^ > 2sigma(F^2^) is used only for calculating R-factors(gt) etc. and is 
 not relevant to the choice of reflections for refinement.  R-factors based 
 on F^2^ are statistically about twice as large as those based on F, and R- 
 factors based on ALL data will be even larger. 
; 
 
_refine_ls_structure_factor_coef  Fsqd  
_refine_ls_matrix_type            full 
_refine_ls_weighting_scheme       calc  
_refine_ls_weighting_details 
 'calc w=1/[\s^2^(Fo^2^)+(0.07P)^2^+1.99P] where P=(Fo^2^+2Fc^2^)/3' 
_atom_sites_solution_primary      direct 
_atom_sites_solution_secondary    difmap 
_atom_sites_solution_hydrogens    geom 
_refine_ls_hydrogen_treatment     constr
_refine_ls_extinction_method      none 
_refine_ls_extinction_coef        ? 
_refine_ls_number_reflns          12327 
_refine_ls_number_parameters      569 
_refine_ls_number_restraints      0 
_refine_ls_R_factor_all           0.0901 
_refine_ls_R_factor_gt            0.0574 
_refine_ls_wR_factor_ref          0.1298 
_refine_ls_wR_factor_gt           0.1208 
_refine_ls_goodness_of_fit_ref    1.039 
_refine_ls_restrained_S_all       1.039 
_refine_ls_shift/su_max           0.000 
_refine_ls_shift/su_mean          0.000 
 
loop_ 
 _atom_site_label 
 _atom_site_type_symbol 
 _atom_site_fract_x 
 _atom_site_fract_y 
 _atom_site_fract_z 
 _atom_site_U_iso_or_equiv 
 _atom_site_adp_type 
 _atom_site_occupancy 
 _atom_site_symmetry_multiplicity 
 _atom_site_calc_flag 
 _atom_site_refinement_flags 
 _atom_site_disorder_assembly 
 _atom_site_disorder_group 
C1 C 0.1393(2) 0.7842(3) 0.10989(19) 0.0420(12) Uani 1 1 d . . . 
C2 C 0.1015(2) 0.8057(3) 0.13883(19) 0.0431(13) Uani 1 1 d . . . 
C3 C 0.1174(2) 0.7956(3) 0.18990(18) 0.0411(12) Uani 1 1 d . . . 
H3 H 0.1507 0.7844 0.2035 0.049 Uiso 1 1 calc R . . 
C4 C 0.0826(2) 0.8027(3) 0.21964(17) 0.0367(11) Uani 1 1 d . . . 
H4 H 0.0929 0.8006 0.2535 0.044 Uiso 1 1 calc R . . 
C5 C 0.0327(2) 0.8128(3) 0.1988(2) 0.0467(13) Uani 1 1 d . . . 
C6 C 0.0155(2) 0.8155(3) 0.14743(19) 0.0423(12) Uani 1 1 d . . . 
H6 H -0.0180 0.8232 0.1335 0.051 Uiso 1 1 calc R . . 
C7 C 0.0506(2) 0.8063(3) 0.11911(18) 0.0375(11) Uani 1 1 d . . . 
H7 H 0.0399 0.8002 0.0855 0.045 Uiso 1 1 calc R . . 
C8 C 0.1727(2) 0.7514(2) -0.07695(18) 0.0333(11) Uani 1 1 d . . . 
C9 C 0.1345(2) 0.7525(3) -0.12284(19) 0.0386(11) Uani 1 1 d . . . 
C10 C 0.0847(2) 0.7521(3) -0.12051(18) 0.0374(11) Uani 1 1 d . . . 
H10 H 0.0762 0.7514 -0.0899 0.045 Uiso 1 1 calc R . . 
C11 C 0.0473(2) 0.7525(3) -0.1612(2) 0.0454(13) Uani 1 1 d . . . 
H11 H 0.0140 0.7526 -0.1586 0.054 Uiso 1 1 calc R . . 
C12 C 0.0599(2) 0.7528(3) -0.2046(2) 0.0448(13) Uani 1 1 d . . . 
C13 C 0.1094(2) 0.7509(3) -0.21140(19) 0.0407(12) Uani 1 1 d . . . 
H13 H 0.1166 0.7494 -0.2425 0.049 Uiso 1 1 calc R . . 
C14 C 0.1480(2) 0.7513(3) -0.16835(18) 0.0361(11) Uani 1 1 d . . . 
H14 H 0.1815 0.7507 -0.1706 0.043 Uiso 1 1 calc R . . 
C15 C 0.2675(2) 0.6028(3) -0.01904(19) 0.0412(12) Uani 1 1 d . . . 
C16 C 0.25874(19) 0.5182(3) -0.01249(18) 0.0372(11) Uani 1 1 d . . . 
C17 C 0.2855(2) 0.4646(3) -0.03582(18) 0.0397(12) Uani 1 1 d . . . 
H17 H 0.3065 0.4827 -0.0557 0.048 Uiso 1 1 calc R . . 
C18 C 0.2797(2) 0.3846(3) -0.0285(2) 0.0505(14) Uani 1 1 d . . . 
H18 H 0.2979 0.3483 -0.0429 0.061 Uiso 1 1 calc R . . 
C19 C 0.24597(19) 0.3563(3) 0.00101(18) 0.0372(11) Uani 1 1 d . . . 
C20 C 0.2200(2) 0.4092(3) 0.02116(19) 0.0425(13) Uani 1 1 d . . . 
H20 H 0.1974 0.3907 0.0393 0.051 Uiso 1 1 calc R . . 
C21 C 0.22526(18) 0.4900(3) 0.01614(17) 0.0370(11) Uani 1 1 d . . . 
H21 H 0.2072 0.5253 0.0313 0.044 Uiso 1 1 calc R . . 
C22 C 0.2012(2) 0.4967(3) 0.13322(19) 0.0436(13) Uani 1 1 d . . . 
H22B H 0.1732 0.4791 0.1089 0.052 Uiso 1 1 calc R . . 
H22C H 0.2013 0.4696 0.1635 0.052 Uiso 1 1 calc R . . 
H22A H 0.2316 0.4851 0.1225 0.052 Uiso 1 1 calc R . . 
C23 C 0.2366(2) 0.6278(3) 0.19914(19) 0.0442(13) Uani 1 1 d . . . 
H23A H 0.2556 0.5825 0.2132 0.066 Uiso 1 1 calc R . . 
H23B H 0.2165 0.6467 0.2212 0.066 Uiso 1 1 calc R . . 
H23C H 0.2589 0.6691 0.1935 0.066 Uiso 1 1 calc R . . 
C24 C 0.05287(19) 0.5947(3) 0.04709(19) 0.0392(12) Uani 1 1 d . . . 
H24A H 0.0474 0.5386 0.0431 0.059 Uiso 1 1 calc R . . 
H24B H 0.0213 0.6216 0.0425 0.059 Uiso 1 1 calc R . . 
H24C H 0.0718 0.6053 0.0794 0.059 Uiso 1 1 calc R . . 
C25 C 0.0861(2) 0.5462(3) -0.04024(17) 0.0349(11) Uani 1 1 d . . . 
H25A H 0.0900 0.5650 -0.0717 0.052 Uiso 1 1 calc R . . 
H25B H 0.0547 0.5191 -0.0436 0.052 Uiso 1 1 calc R . . 
H25C H 0.1128 0.5102 -0.0273 0.052 Uiso 1 1 calc R . . 
C26 C 0.3077(2) 0.4108(4) 0.2244(2) 0.0506(14) Uani 1 1 d . . . 
H26A H 0.3236 0.4546 0.2435 0.061 Uiso 1 1 calc R . . 
H26C H 0.3048 0.4224 0.1902 0.061 Uiso 1 1 calc R . . 
H26B H 0.3274 0.3637 0.2326 0.061 Uiso 1 1 calc R . . 
C27 C 0.2326(2) 0.2956(3) 0.2477(2) 0.0484(14) Uani 1 1 d . . . 
H27A H 0.2291 0.2683 0.2170 0.058 Uiso 1 1 calc R . . 
H27C H 0.2039 0.2855 0.2615 0.058 Uiso 1 1 calc R . . 
H27B H 0.2621 0.2769 0.2698 0.058 Uiso 1 1 calc R . . 
C28 C 0.6098(2) 0.0895(4) 0.6693(2) 0.0503(14) Uani 1 1 d . . . 
H28A H 0.6178 0.0434 0.6522 0.076 Uiso 1 1 calc R . . 
H28B H 0.6401 0.1144 0.6860 0.076 Uiso 1 1 calc R . . 
H28C H 0.5911 0.1263 0.6463 0.076 Uiso 1 1 calc R . . 
C29 C 0.5002(2) 0.0655(4) 0.6910(2) 0.0561(16) Uani 1 1 d . . . 
H29A H 0.4859 0.1019 0.7108 0.067 Uiso 1 1 calc R . . 
H29C H 0.4856 0.0139 0.6923 0.067 Uiso 1 1 calc R . . 
H29B H 0.4937 0.0839 0.6578 0.067 Uiso 1 1 calc R . . 
C30 C 0.3855(2) 0.5868(3) 0.3753(2) 0.0499(15) Uani 1 1 d . . . 
H30A H 0.3504 0.5749 0.3675 0.075 Uiso 1 1 calc R . . 
H30B H 0.3903 0.6429 0.3722 0.075 Uiso 1 1 calc R . . 
H30C H 0.3991 0.5705 0.4084 0.075 Uiso 1 1 calc R . . 
C31 C 0.4933(2) 0.5604(4) 0.3363(2) 0.0545(16) Uani 1 1 d . . . 
H31A H 0.5081 0.5227 0.3177 0.082 Uiso 1 1 calc R . . 
H31B H 0.5107 0.5589 0.3699 0.082 Uiso 1 1 calc R . . 
H31C H 0.4957 0.6128 0.3234 0.082 Uiso 1 1 calc R . . 
Gd1 Gd 0.201080(9) 0.732346(14) 0.046113(8) 0.03277(9) Uani 1 1 d . . . 
N1 N -0.00546(19) 0.8147(3) 0.22522(17) 0.0496(12) Uani 1 1 d . . . 
N2 N 0.02516(18) 0.7489(3) -0.24905(18) 0.0463(11) Uani 1 1 d . . . 
N3 N 0.23573(16) 0.2800(2) 0.00515(15) 0.0380(10) Uani 1 1 d . . . 
O1 O 0.18386(13) 0.77429(19) 0.12606(12) 0.0366(8) Uani 1 1 d . . . 
O2 O 0.11995(14) 0.7765(2) 0.06349(13) 0.0432(9) Uani 1 1 d . . . 
O3 O 0.16152(14) 0.75385(19) -0.03506(12) 0.0379(8) Uani 1 1 d . . . 
O4 O 0.21639(13) 0.74730(17) -0.08599(12) 0.0346(8) Uani 1 1 d . . . 
O5 O 0.24668(13) 0.6496(2) 0.00289(12) 0.0397(8) Uani 1 1 d . . . 
O6 O 0.29794(12) 0.62266(19) -0.04616(11) 0.0334(7) Uani 1 1 d . . . 
O7 O 0.22327(13) 0.62736(18) 0.10235(11) 0.0337(7) Uani 1 1 d . . . 
O8 O 0.14020(12) 0.6275(2) 0.02639(12) 0.0376(8) Uani 1 1 d . . . 
O9 O 0.23348(14) 0.4295(2) 0.28801(13) 0.0498(10) Uani 1 1 d . . . 
O10 O 0.57872(13) -0.0262(2) 0.72116(11) 0.0379(8) Uani 1 1 d . . . 
O11 O 0.38569(14) 0.5641(2) 0.28524(13) 0.0446(9) Uani 1 1 d . . . 
O12 O 0.3987(3) 0.1179(5) 0.1629(3) 0.047(2) Uani 0.40 1 d P . . 
H12D H 0.3820 0.1608 0.1595 0.056 Uiso 0.40 1 d PR . . 
H12A H 0.3939 0.0935 0.1882 0.056 Uiso 0.40 1 d PR . . 
O13 O 0.4360(4) 0.1398(6) 0.1144(3) 0.055(3) Uani 0.40 1 d P . . 
H13B H 0.4274 0.1606 0.0862 0.066 Uiso 0.40 1 d PR . . 
H13C H 0.4489 0.1751 0.1349 0.066 Uiso 0.40 1 d PR . . 
O14 O 0.1412(4) 0.7488(6) 0.4291(4) 0.055(3) Uani 0.40 1 d P . . 
H14C H 0.1504 0.7879 0.4138 0.066 Uiso 0.40 1 d PR . . 
H14D H 0.1107 0.7385 0.4175 0.066 Uiso 0.40 1 d PR . . 
O15 O 0.1754(4) 0.5673(5) 0.8960(4) 0.051(2) Uani 0.40 1 d P . . 
H15B H 0.1679 0.5490 0.9220 0.061 Uiso 0.40 1 d PR . . 
H15C H 0.1496 0.5670 0.8730 0.061 Uiso 0.40 1 d PR . . 
O16 O 0.4880(4) 0.3887(6) 0.4884(3) 0.052(3) Uani 0.40 1 d P . . 
H16A H 0.5157 0.3693 0.4847 0.062 Uiso 0.40 1 d PR . . 
H16B H 0.4921 0.4115 0.5161 0.062 Uiso 0.40 1 d PR . . 
O17 O 0.6365(4) 0.5522(5) 0.8589(4) 0.051(2) Uani 0.40 1 d P . . 
H17C H 0.6447 0.5106 0.8759 0.061 Uiso 0.40 1 d PR . . 
H17E H 0.6144 0.5775 0.8702 0.061 Uiso 0.40 1 d PR . . 
O18 O 0.2275(4) 0.3640(6) 0.8165(3) 0.048(2) Uani 0.40 1 d P . . 
H18B H 0.2189 0.3676 0.8440 0.058 Uiso 0.40 1 d PR . . 
H18C H 0.2090 0.3941 0.7959 0.058 Uiso 0.40 1 d PR . . 
O19 O 0.2449(5) 0.2430(8) 0.8620(5) 0.055(4) Uani 0.30 1 d P . . 
H19A H 0.2173 0.2201 0.8624 0.066 Uiso 0.30 1 d PR . . 
H19C H 0.2603 0.2518 0.8912 0.066 Uiso 0.30 1 d PR . . 
O20 O 0.0718(4) 0.0290(7) 0.4738(4) 0.042(3) Uani 0.30 1 d P . . 
H20B H 0.0703 -0.0215 0.4734 0.050 Uiso 0.30 1 d PR . . 
H20C H 0.0425 0.0480 0.4652 0.050 Uiso 0.30 1 d PR . . 
O21 O 0.4086(4) 0.8199(7) 0.4483(4) 0.041(3) Uani 0.30 1 d P . . 
H21D H 0.3872 0.8170 0.4215 0.049 Uiso 0.30 1 d PR . . 
H21A H 0.3943 0.8351 0.4710 0.049 Uiso 0.30 1 d PR . . 
O22 O 0.4528(5) 0.7207(7) 0.4503(5) 0.054(4) Uani 0.30 1 d P . . 
H22D H 0.4748 0.7211 0.4767 0.064 Uiso 0.30 1 d PR . . 
H22E H 0.4346 0.6796 0.4496 0.064 Uiso 0.30 1 d PR . . 
S1 S 0.19677(5) 0.59975(7) 0.14195(5) 0.0359(3) Uani 1 1 d . . . 
S2 S 0.08768(5) 0.63060(7) 0.00151(5) 0.0345(3) Uani 1 1 d . . . 
S3 S 0.23766(6) 0.39316(9) 0.23881(5) 0.0470(4) Uani 1 1 d . . . 
S4 S 0.57126(6) 0.05901(8) 0.71547(5) 0.0451(3) Uani 1 1 d . . . 
S5 S 0.41815(5) 0.53143(8) 0.33195(4) 0.0363(3) Uani 1 1 d . . . 
 
loop_ 
 _atom_site_aniso_label 
 _atom_site_aniso_U_11 
 _atom_site_aniso_U_22 
 _atom_site_aniso_U_33 
 _atom_site_aniso_U_23 
 _atom_site_aniso_U_13 
 _atom_site_aniso_U_12 
C1 0.052(4) 0.039(3) 0.035(3) -0.007(2) 0.010(2) -0.004(2) 
C2 0.054(3) 0.030(3) 0.046(3) 0.000(2) 0.012(3) 0.022(2) 
C3 0.053(3) 0.034(2) 0.039(3) -0.001(2) 0.016(2) -0.020(2) 
C4 0.048(3) 0.040(3) 0.025(2) 0.0087(19) 0.015(2) 0.006(2) 
C5 0.042(3) 0.046(3) 0.055(3) 0.003(3) 0.017(3) 0.000(3) 
C6 0.043(3) 0.038(3) 0.046(3) 0.007(2) 0.008(2) 0.013(2) 
C7 0.040(3) 0.038(3) 0.038(3) -0.014(2) 0.014(2) -0.015(2) 
C8 0.042(3) 0.018(2) 0.041(3) -0.0059(18) 0.011(2) -0.0015(19) 
C9 0.038(3) 0.037(3) 0.040(3) -0.004(2) 0.005(2) -0.005(2) 
C10 0.046(3) 0.040(3) 0.028(2) 0.0057(19) 0.010(2) 0.004(2) 
C11 0.047(3) 0.038(3) 0.045(3) 0.015(2) -0.003(3) -0.008(2) 
C12 0.055(3) 0.036(3) 0.041(3) 0.011(2) 0.003(3) 0.001(2) 
C13 0.049(3) 0.038(3) 0.031(2) 0.004(2) -0.002(2) -0.006(2) 
C14 0.036(3) 0.029(2) 0.035(3) 0.0052(19) -0.011(2) 0.001(2) 
C15 0.044(3) 0.042(3) 0.041(3) -0.005(2) 0.017(3) -0.008(2) 
C16 0.038(3) 0.037(3) 0.042(3) 0.000(2) 0.020(2) -0.003(2) 
C17 0.040(3) 0.047(3) 0.034(3) -0.001(2) 0.014(2) -0.005(2) 
C18 0.061(4) 0.044(3) 0.048(3) -0.002(2) 0.013(3) 0.000(3) 
C19 0.039(3) 0.030(2) 0.041(3) -0.0039(19) 0.005(2) -0.006(2) 
C20 0.049(3) 0.038(3) 0.050(3) -0.021(2) 0.032(3) -0.017(2) 
C21 0.023(2) 0.057(3) 0.031(2) -0.001(2) 0.0052(19) -0.003(2) 
C22 0.049(3) 0.028(2) 0.048(3) 0.008(2) -0.005(3) -0.006(2) 
C23 0.046(3) 0.044(3) 0.045(3) -0.008(2) 0.016(3) -0.009(3) 
C24 0.036(3) 0.031(2) 0.050(3) 0.015(2) 0.005(2) 0.002(2) 
C25 0.047(3) 0.028(2) 0.031(2) 0.0020(19) 0.011(2) 0.000(2) 
C26 0.052(4) 0.052(3) 0.051(3) 0.002(3) 0.018(3) 0.019(3) 
C27 0.054(3) 0.057(3) 0.042(3) -0.017(2) 0.028(3) 0.014(3) 
C28 0.054(4) 0.056(3) 0.042(3) 0.011(3) 0.013(3) -0.007(3) 
C29 0.050(4) 0.059(4) 0.051(3) -0.017(3) -0.008(3) 0.004(3) 
C30 0.055(4) 0.053(3) 0.047(3) -0.006(3) 0.022(3) 0.034(3) 
C31 0.042(3) 0.067(4) 0.049(3) -0.022(3) -0.001(3) 0.024(3) 
Gd1 0.03718(14) 0.03299(14) 0.02780(13) -0.00346(9) 0.00594(9) -0.01154(11) 
N1 0.055(3) 0.047(3) 0.053(3) -0.006(2) 0.025(3) -0.003(2) 
N2 0.043(3) 0.050(3) 0.047(3) 0.009(2) 0.009(2) -0.007(2) 
N3 0.033(2) 0.034(2) 0.042(2) -0.0158(18) -0.0052(19) 0.0035(18) 
O1 0.0321(18) 0.0409(19) 0.0391(18) -0.0068(15) 0.0128(15) -0.0106(16) 
O2 0.038(2) 0.049(2) 0.043(2) 0.0103(16) 0.0083(16) -0.0058(17) 
O3 0.043(2) 0.0358(18) 0.0344(18) -0.0115(14) 0.0067(16) -0.0108(15) 
O4 0.040(2) 0.0216(15) 0.0399(19) -0.0083(13) 0.0029(16) -0.0059(14) 
O5 0.041(2) 0.0361(18) 0.0420(19) 0.0044(15) 0.0072(17) 0.0077(16) 
O6 0.0393(19) 0.0327(17) 0.0278(16) -0.0035(13) 0.0060(14) -0.0114(15) 
O7 0.043(2) 0.0308(16) 0.0277(16) -0.0071(13) 0.0076(15) -0.0137(15) 
O8 0.0297(18) 0.0435(19) 0.0419(19) -0.0010(15) 0.0128(15) -0.0106(15) 
O9 0.042(2) 0.048(2) 0.045(2) 0.0263(17) -0.0231(17) -0.0034(18) 
O10 0.038(2) 0.0446(19) 0.0280(17) 0.0048(14) 0.0005(15) 0.0090(16) 
O11 0.049(2) 0.047(2) 0.0383(19) -0.0062(15) 0.0105(17) 0.0109(18) 
O12 0.043(5) 0.038(5) 0.058(6) -0.008(4) 0.008(5) 0.030(4) 
O13 0.073(7) 0.058(6) 0.032(5) 0.004(4) 0.005(5) -0.026(6) 
O14 0.072(7) 0.050(6) 0.043(5) 0.019(4) 0.014(5) 0.006(5) 
O15 0.039(5) 0.035(5) 0.076(7) -0.008(4) 0.008(5) 0.005(4) 
O16 0.043(6) 0.059(6) 0.045(5) -0.001(4) -0.010(4) 0.015(5) 
O17 0.058(6) 0.033(5) 0.061(6) 0.010(4) 0.008(5) -0.001(4) 
O18 0.046(6) 0.062(6) 0.034(5) -0.007(4) 0.004(4) 0.025(5) 
O19 0.035(7) 0.066(8) 0.051(8) -0.023(6) -0.024(6) 0.011(6) 
O20 0.036(6) 0.051(7) 0.043(7) -0.028(5) 0.018(5) 0.002(5) 
O21 0.028(6) 0.049(7) 0.041(6) -0.008(5) -0.003(5) -0.011(5) 
O22 0.054(8) 0.048(7) 0.058(8) 0.036(6) 0.011(7) 0.000(6) 
S1 0.0450(7) 0.0264(6) 0.0391(6) -0.0082(5) 0.0152(6) 0.0001(5) 
S2 0.0287(6) 0.0344(6) 0.0448(7) -0.0111(5) 0.0178(5) -0.0092(5) 
S3 0.0475(8) 0.0511(8) 0.0438(7) -0.0237(6) 0.0126(6) 0.0145(6) 
S4 0.0523(8) 0.0350(7) 0.0404(7) 0.0130(5) -0.0083(6) 0.0000(6) 
S5 0.0321(6) 0.0441(7) 0.0382(6) 0.0084(5) 0.0202(5) 0.0153(5) 
 
_geom_special_details 
; 
 All esds (except the esd in the dihedral angle between two l.s. planes) 
 are estimated using the full covariance matrix.  The cell esds are taken 
 into account individually in the estimation of esds in distances, angles 
 and torsion angles; correlations between esds in cell parameters are only 
 used when they are defined by crystal symmetry.  An approximate (isotropic) 
 treatment of cell esds is used for estimating esds involving l.s. planes. 
; 
 
loop_ 
 _geom_bond_atom_site_label_1 
 _geom_bond_atom_site_label_2 
 _geom_bond_distance 
 _geom_bond_site_symmetry_2 
 _geom_bond_publ_flag 
C1 O1 1.221(7) . ? 
C1 O2 1.301(6) . ? 
C1 C2 1.483(8) . ? 
C2 C7 1.387(7) . ? 
C2 C3 1.412(7) . ? 
C3 C4 1.393(7) . ? 
C3 H3 0.9300 . ? 
C4 C5 1.378(8) . ? 
C4 H4 0.9300 . ? 
C5 N1 1.399(7) . ? 
C5 C6 1.414(8) . ? 
C6 C7 1.373(7) . ? 
C6 H6 0.9300 . ? 
C7 H7 0.9300 . ? 
C8 O3 1.269(6) . ? 
C8 O4 1.274(6) . ? 
C8 C9 1.478(7) . ? 
C9 C10 1.377(8) . ? 
C9 C14 1.395(8) . ? 
C10 C11 1.363(7) . ? 
C10 H10 0.9300 . ? 
C11 C12 1.327(8) . ? 
C11 H11 0.9300 . ? 
C12 N2 1.400(7) . ? 
C12 C13 1.404(8) . ? 
C13 C14 1.428(7) . ? 
C13 H13 0.9300 . ? 
C14 H14 0.9300 . ? 
C15 O5 1.211(6) . ? 
C15 O6 1.279(6) . ? 
C15 C16 1.462(7) . ? 
C15 Gd1 3.045(5) 7_565 ? 
C16 C17 1.403(7) . ? 
C16 C21 1.416(7) . ? 
C17 C18 1.375(8) . ? 
C17 H17 0.9300 . ? 
C18 C19 1.441(8) . ? 
C18 H18 0.9300 . ? 
C19 N3 1.323(6) . ? 
C19 C20 1.334(7) . ? 
C20 C21 1.378(7) . ? 
C20 H20 0.9300 . ? 
C21 H21 0.9300 . ? 
C22 S1 1.759(5) . ? 
C22 H22B 0.9600 . ? 
C22 H22C 0.9600 . ? 
C22 H22A 0.9600 . ? 
C23 S1 1.800(5) . ? 
C23 H23A 0.9600 . ? 
C23 H23B 0.9600 . ? 
C23 H23C 0.9600 . ? 
C24 S2 1.841(5) . ? 
C24 H24A 0.9600 . ? 
C24 H24B 0.9600 . ? 
C24 H24C 0.9600 . ? 
C25 S2 1.832(5) . ? 
C25 H25A 0.9600 . ? 
C25 H25B 0.9600 . ? 
C25 H25C 0.9600 . ? 
C26 S3 2.061(6) . ? 
C26 H26A 0.9600 . ? 
C26 H26C 0.9600 . ? 
C26 H26B 0.9600 . ? 
C27 S3 1.671(6) . ? 
C27 H27A 0.9600 . ? 
C27 H27C 0.9600 . ? 
C27 H27B 0.9600 . ? 
C28 S4 1.898(6) . ? 
C28 H28A 0.9600 . ? 
C28 H28B 0.9600 . ? 
C28 H28C 0.9600 . ? 
C29 S4 1.927(6) . ? 
C29 H29A 0.9600 . ? 
C29 H29C 0.9600 . ? 
C29 H29B 0.9600 . ? 
C30 S5 1.893(5) . ? 
C30 H30A 0.9600 . ? 
C30 H30B 0.9600 . ? 
C30 H30C 0.9600 . ? 
C31 S5 2.093(6) . ? 
C31 H31A 0.9600 . ? 
C31 H31B 0.9600 . ? 
C31 H31C 0.9600 . ? 
Gd1 O4 2.328(3) 7_565 ? 
Gd1 O3 2.330(3) . ? 
Gd1 O7 2.358(3) . ? 
Gd1 O5 2.360(3) . ? 
Gd1 O8 2.411(3) . ? 
Gd1 O6 2.440(3) 7_565 ? 
Gd1 O1 2.477(3) . ? 
Gd1 O2 2.482(4) . ? 
Gd1 O5 2.944(4) 7_565 ? 
Gd1 C15 3.045(5) 7_565 ? 
N1 N1 1.354(9) 2 ? 
N2 N2 1.367(9) 2_554 ? 
N3 N3 1.344(8) 7 ? 
O4 Gd1 2.328(3) 7_565 ? 
O5 Gd1 2.944(3) 7_565 ? 
O6 Gd1 2.440(3) 7_565 ? 
O7 S1 1.515(3) . ? 
O8 S2 1.463(4) . ? 
O9 S3 1.529(4) . ? 
O10 S4 1.452(4) . ? 
O11 S5 1.521(4) . ? 
O12 H12D 0.8500 . ? 
O12 H12A 0.8501 . ? 
O13 H13B 0.8501 . ? 
O13 H13C 0.8499 . ? 
O14 H14C 0.8501 . ? 
O14 H14D 0.8500 . ? 
O15 H15B 0.8501 . ? 
O15 H15C 0.8500 . ? 
O16 H16A 0.8500 . ? 
O16 H16B 0.8497 . ? 
O17 H17C 0.8499 . ? 
O17 H17E 0.8501 . ? 
O18 H18B 0.8502 . ? 
O18 H18C 0.8500 . ? 
O19 H19A 0.8499 . ? 
O19 H19C 0.8500 . ? 
O20 H20B 0.8501 . ? 
O20 H20C 0.8499 . ? 
O21 H21D 0.8501 . ? 
O21 H21A 0.8501 . ? 
O22 H22D 0.8500 . ? 
O22 H22E 0.8501 . ? 
 
loop_ 
 _geom_angle_atom_site_label_1 
 _geom_angle_atom_site_label_2 
 _geom_angle_atom_site_label_3 
 _geom_angle 
 _geom_angle_site_symmetry_1 
 _geom_angle_site_symmetry_3 
 _geom_angle_publ_flag 
O1 C1 O2 121.7(5) . . ? 
O1 C1 C2 126.0(5) . . ? 
O2 C1 C2 112.3(5) . . ? 
C7 C2 C3 118.5(5) . . ? 
C7 C2 C1 122.8(5) . . ? 
C3 C2 C1 114.5(5) . . ? 
C4 C3 C2 118.9(5) . . ? 
C4 C3 H3 120.5 . . ? 
C2 C3 H3 120.5 . . ? 
C5 C4 C3 119.9(5) . . ? 
C5 C4 H4 120.1 . . ? 
C3 C4 H4 120.1 . . ? 
C4 C5 N1 124.1(5) . . ? 
C4 C5 C6 121.8(5) . . ? 
N1 C5 C6 113.9(5) . . ? 
C7 C6 C5 117.0(5) . . ? 
C7 C6 H6 121.5 . . ? 
C5 C6 H6 121.5 . . ? 
C6 C7 C2 122.4(5) . . ? 
C6 C7 H7 118.8 . . ? 
C2 C7 H7 118.8 . . ? 
O3 C8 O4 126.8(5) . . ? 
O3 C8 C9 122.4(5) . . ? 
O4 C8 C9 110.8(4) . . ? 
C10 C9 C14 119.6(5) . . ? 
C10 C9 C8 119.3(5) . . ? 
C14 C9 C8 121.0(5) . . ? 
C11 C10 C9 122.7(5) . . ? 
C11 C10 H10 118.6 . . ? 
C9 C10 H10 118.6 . . ? 
C12 C11 C10 118.0(6) . . ? 
C12 C11 H11 121.0 . . ? 
C10 C11 H11 121.0 . . ? 
C11 C12 N2 123.4(6) . . ? 
C11 C12 C13 124.2(5) . . ? 
N2 C12 C13 112.2(5) . . ? 
C12 C13 C14 117.0(5) . . ? 
C12 C13 H13 121.5 . . ? 
C14 C13 H13 121.5 . . ? 
C9 C14 C13 118.4(5) . . ? 
C9 C14 H14 120.8 . . ? 
C13 C14 H14 120.8 . . ? 
O5 C15 O6 124.1(5) . . ? 
O5 C15 C16 117.6(5) . . ? 
O6 C15 C16 118.2(5) . . ? 
O5 C15 Gd1 73.7(3) . 7_565 ? 
O6 C15 Gd1 50.5(2) . 7_565 ? 
C16 C15 Gd1 168.7(4) . 7_565 ? 
C17 C16 C21 120.4(5) . . ? 
C17 C16 C15 116.9(4) . . ? 
C21 C16 C15 122.7(5) . . ? 
C18 C17 C16 118.3(5) . . ? 
C18 C17 H17 120.8 . . ? 
C16 C17 H17 120.8 . . ? 
C17 C18 C19 121.0(5) . . ? 
C17 C18 H18 119.5 . . ? 
C19 C18 H18 119.5 . . ? 
N3 C19 C20 118.0(5) . . ? 
N3 C19 C18 122.9(5) . . ? 
C20 C19 C18 118.8(5) . . ? 
C19 C20 C21 122.6(5) . . ? 
C19 C20 H20 118.7 . . ? 
C21 C20 H20 118.7 . . ? 
C20 C21 C16 118.8(5) . . ? 
C20 C21 H21 120.6 . . ? 
C16 C21 H21 120.6 . . ? 
S1 C22 H22B 109.5 . . ? 
S1 C22 H22C 109.5 . . ? 
H22B C22 H22C 109.5 . . ? 
S1 C22 H22A 109.5 . . ? 
H22B C22 H22A 109.5 . . ? 
H22C C22 H22A 109.5 . . ? 
S1 C23 H23A 109.5 . . ? 
S1 C23 H23B 109.5 . . ? 
H23A C23 H23B 109.5 . . ? 
S1 C23 H23C 109.5 . . ? 
H23A C23 H23C 109.5 . . ? 
H23B C23 H23C 109.5 . . ? 
S2 C24 H24A 109.5 . . ? 
S2 C24 H24B 109.5 . . ? 
H24A C24 H24B 109.5 . . ? 
S2 C24 H24C 109.5 . . ? 
H24A C24 H24C 109.5 . . ? 
H24B C24 H24C 109.5 . . ? 
S2 C25 H25A 109.5 . . ? 
S2 C25 H25B 109.5 . . ? 
H25A C25 H25B 109.5 . . ? 
S2 C25 H25C 109.5 . . ? 
H25A C25 H25C 109.5 . . ? 
H25B C25 H25C 109.5 . . ? 
S3 C26 H26A 109.5 . . ? 
S3 C26 H26C 109.5 . . ? 
H26A C26 H26C 109.5 . . ? 
S3 C26 H26B 109.5 . . ? 
H26A C26 H26B 109.5 . . ? 
H26C C26 H26B 109.5 . . ? 
S3 C27 H27A 109.5 . . ? 
S3 C27 H27C 109.5 . . ? 
H27A C27 H27C 109.5 . . ? 
S3 C27 H27B 109.5 . . ? 
H27A C27 H27B 109.5 . . ? 
H27C C27 H27B 109.5 . . ? 
S4 C28 H28A 109.5 . . ? 
S4 C28 H28B 109.5 . . ? 
H28A C28 H28B 109.5 . . ? 
S4 C28 H28C 109.5 . . ? 
H28A C28 H28C 109.5 . . ? 
H28B C28 H28C 109.5 . . ? 
S4 C29 H29A 109.5 . . ? 
S4 C29 H29C 109.5 . . ? 
H29A C29 H29C 109.5 . . ? 
S4 C29 H29B 109.5 . . ? 
H29A C29 H29B 109.5 . . ? 
H29C C29 H29B 109.5 . . ? 
S5 C30 H30A 109.5 . . ? 
S5 C30 H30B 109.5 . . ? 
H30A C30 H30B 109.5 . . ? 
S5 C30 H30C 109.5 . . ? 
H30A C30 H30C 109.5 . . ? 
H30B C30 H30C 109.5 . . ? 
S5 C31 H31A 109.5 . . ? 
S5 C31 H31B 109.5 . . ? 
H31A C31 H31B 109.5 . . ? 
S5 C31 H31C 109.5 . . ? 
H31A C31 H31C 109.5 . . ? 
H31B C31 H31C 109.5 . . ? 
O4 Gd1 O3 130.75(13) 7_565 . ? 
O4 Gd1 O7 72.58(11) 7_565 . ? 
O3 Gd1 O7 140.19(10) . . ? 
O4 Gd1 O5 76.60(12) 7_565 . ? 
O3 Gd1 O5 77.47(12) . . ? 
O7 Gd1 O5 78.92(11) . . ? 
O4 Gd1 O8 140.65(11) 7_565 . ? 
O3 Gd1 O8 74.39(11) . . ? 
O7 Gd1 O8 71.02(11) . . ? 
O5 Gd1 O8 82.24(12) . . ? 
O4 Gd1 O6 80.98(11) 7_565 7_565 ? 
O3 Gd1 O6 81.26(10) . 7_565 ? 
O7 Gd1 O6 138.37(10) . 7_565 ? 
O5 Gd1 O6 125.66(11) . 7_565 ? 
O8 Gd1 O6 137.64(11) . 7_565 ? 
O4 Gd1 O1 82.72(12) 7_565 . ? 
O3 Gd1 O1 134.07(12) . . ? 
O7 Gd1 O1 71.60(11) . . ? 
O5 Gd1 O1 147.94(12) . . ? 
O8 Gd1 O1 99.41(11) . . ? 
O6 Gd1 O1 73.66(11) 7_565 . ? 
O4 Gd1 O2 132.93(12) 7_565 . ? 
O3 Gd1 O2 83.60(12) . . ? 
O7 Gd1 O2 102.25(12) . . ? 
O5 Gd1 O2 149.87(12) . . ? 
O8 Gd1 O2 70.12(12) . . ? 
O6 Gd1 O2 73.18(11) 7_565 . ? 
O1 Gd1 O2 52.74(12) . . ? 
O4 Gd1 O5 66.84(11) 7_565 7_565 ? 
O3 Gd1 O5 67.42(11) . 7_565 ? 
O7 Gd1 O5 137.03(11) . 7_565 ? 
O5 Gd1 O5 78.57(12) . 7_565 ? 
O8 Gd1 O5 140.04(10) . 7_565 ? 
O6 Gd1 O5 47.10(10) 7_565 7_565 ? 
O1 Gd1 O5 115.29(10) . 7_565 ? 
O2 Gd1 O5 115.37(10) . 7_565 ? 
O4 Gd1 C15 71.90(13) 7_565 7_565 ? 
O3 Gd1 C15 73.46(13) . 7_565 ? 
O7 Gd1 C15 143.19(13) . 7_565 ? 
O5 Gd1 C15 101.81(13) . 7_565 ? 
O8 Gd1 C15 145.79(13) . 7_565 ? 
O6 Gd1 C15 23.86(13) 7_565 7_565 ? 
O1 Gd1 C15 94.57(12) . 7_565 ? 
O2 Gd1 C15 94.88(13) . 7_565 ? 
O5 Gd1 C15 23.25(12) 7_565 7_565 ? 
N1 N1 C5 120.5(6) 2 . ? 
N2 N2 C12 122.0(6) 2_554 . ? 
C19 N3 N3 124.6(6) . 7 ? 
C1 O1 Gd1 93.8(3) . . ? 
C1 O2 Gd1 91.6(3) . . ? 
C8 O3 Gd1 137.7(3) . . ? 
C8 O4 Gd1 139.0(3) . 7_565 ? 
C15 O5 Gd1 175.1(4) . . ? 
C15 O5 Gd1 83.1(3) . 7_565 ? 
Gd1 O5 Gd1 101.43(12) . 7_565 ? 
C15 O6 Gd1 105.6(3) . 7_565 ? 
S1 O7 Gd1 128.3(2) . . ? 
S2 O8 Gd1 130.3(2) . . ? 
H12D O12 H12A 109.5 . . ? 
H13B O13 H13C 109.5 . . ? 
H14C O14 H14D 109.5 . . ? 
H15B O15 H15C 109.5 . . ? 
H16A O16 H16B 109.5 . . ? 
H17C O17 H17E 109.5 . . ? 
H18B O18 H18C 109.5 . . ? 
H19A O19 H19C 109.5 . . ? 
H20B O20 H20C 109.5 . . ? 
H21D O21 H21A 109.5 . . ? 
H22D O22 H22E 109.5 . . ? 
O7 S1 C22 98.3(2) . . ? 
O7 S1 C23 105.9(2) . . ? 
C22 S1 C23 109.5(3) . . ? 
O8 S2 C25 99.6(2) . . ? 
O8 S2 C24 104.9(2) . . ? 
C25 S2 C24 103.8(2) . . ? 
O9 S3 C27 103.7(2) . . ? 
O9 S3 C26 111.3(2) . . ? 
C27 S3 C26 106.2(3) . . ? 
O10 S4 C28 104.8(3) . . ? 
O10 S4 C29 101.7(3) . . ? 
C28 S4 C29 114.0(3) . . ? 
O11 S5 C30 95.8(2) . . ? 
O11 S5 C31 111.1(2) . . ? 
C30 S5 C31 115.9(3) . . ? 
 
_diffrn_measured_fraction_theta_max    0.996 
_diffrn_reflns_theta_full              26.00 
_diffrn_measured_fraction_theta_full   0.996 
_refine_diff_density_max    0.700 
_refine_diff_density_min   -1.282 
_refine_diff_density_rms    0.082 

#===END


data_11Ce
_database_code_depnum_ccdc_archive 'CCDC 745295'
_audit_creation_method           SHELXL-2000
_chemical_name_systematic        
;
?
; 
_chemical_name_common             ? 
_chemical_melting_point           ? 
_chemical_formula_moiety          ? 
_chemical_formula_sum 
 'C576 H1168 Ce12 N48 O332 S120' 
_chemical_formula_weight          19608.22 
 
loop_ 
 _atom_type_symbol 
 _atom_type_description 
 _atom_type_scat_dispersion_real 
 _atom_type_scat_dispersion_imag 
 _atom_type_scat_source 
 'C'  'C'   0.0033   0.0016 
 'International Tables Vol C Tables 4.2.6.8 and 6.1.1.4' 
 'H'  'H'   0.0000   0.0000 
 'International Tables Vol C Tables 4.2.6.8 and 6.1.1.4' 
 'N'  'N'   0.0061   0.0033 
 'International Tables Vol C Tables 4.2.6.8 and 6.1.1.4' 
 'O'  'O'   0.0106   0.0060 
 'International Tables Vol C Tables 4.2.6.8 and 6.1.1.4' 
 'Ce'  'Ce'  -0.2486   2.6331 
 'International Tables Vol C Tables 4.2.6.8 and 6.1.1.4' 
 'S'  'S'   0.1246   0.1234 
 'International Tables Vol C Tables 4.2.6.8 and 6.1.1.4' 
 
_symmetry_cell_setting           'Cubic'
_symmetry_space_group_name_H-M   'Ia-3'
_symmetry_space_group_name_Hall   '-I 2b 2c 3' 
 
loop_ 
 _symmetry_equiv_pos_as_xyz 
 'x, y, z' 
 '-x+1/2, -y, z+1/2' 
 '-x, y+1/2, -z+1/2' 
 'x+1/2, -y+1/2, -z' 
 'z, x, y' 
 'z+1/2, -x+1/2, -y' 
 '-z+1/2, -x, y+1/2' 
 '-z, x+1/2, -y+1/2' 
 'y, z, x' 
 '-y, z+1/2, -x+1/2' 
 'y+1/2, -z+1/2, -x' 
 '-y+1/2, -z, x+1/2' 
 'x+1/2, y+1/2, z+1/2' 
 '-x+1, -y+1/2, z+1' 
 '-x+1/2, y+1, -z+1' 
 'x+1, -y+1, -z+1/2' 
 'z+1/2, x+1/2, y+1/2' 
 'z+1, -x+1, -y+1/2' 
 '-z+1, -x+1/2, y+1' 
 '-z+1/2, x+1, -y+1' 
 'y+1/2, z+1/2, x+1/2' 
 '-y+1/2, z+1, -x+1' 
 'y+1, -z+1, -x+1/2' 
 '-y+1, -z+1/2, x+1' 
 '-x, -y, -z' 
 'x-1/2, y, -z-1/2' 
 'x, -y-1/2, z-1/2' 
 '-x-1/2, y-1/2, z' 
 '-z, -x, -y' 
 '-z-1/2, x-1/2, y' 
 'z-1/2, x, -y-1/2' 
 'z, -x-1/2, y-1/2' 
 '-y, -z, -x' 
 'y, -z-1/2, x-1/2' 
 '-y-1/2, z-1/2, x' 
 'y-1/2, z, -x-1/2' 
 '-x+1/2, -y+1/2, -z+1/2' 
 'x, y+1/2, -z' 
 'x+1/2, -y, z' 
 '-x, y, z+1/2' 
 '-z+1/2, -x+1/2, -y+1/2' 
 '-z, x, y+1/2' 
 'z, x+1/2, -y' 
 'z+1/2, -x, y' 
 '-y+1/2, -z+1/2, -x+1/2' 
 'y+1/2, -z, x' 
 '-y, z, x+1/2' 
 'y, z+1/2, -x' 
 
_cell_length_a                    39.854(2) 
_cell_length_b                    39.854(2) 
_cell_length_c                    39.854(2) 
_cell_angle_alpha                 90.00 
_cell_angle_beta                  90.00 
_cell_angle_gamma                 90.00 
_cell_volume                      63299(6) 
_cell_formula_units_Z             2 
_cell_measurement_temperature     293(2) 
_cell_measurement_reflns_used     3010
_cell_measurement_theta_min       2.11 
_cell_measurement_theta_max       25.2 
 
_exptl_crystal_description        block 
_exptl_crystal_colour             red 
_exptl_crystal_size_max           0.30 
_exptl_crystal_size_mid           0.26 
_exptl_crystal_size_min           0.24 
_exptl_crystal_density_meas       ? 
_exptl_crystal_density_diffrn     1.029 
_exptl_crystal_density_method     'not measured' 
_exptl_crystal_F_000              20464 
_exptl_absorpt_coefficient_mu     0.683 
_exptl_absorpt_correction_type    'multi-scan' 
_exptl_absorpt_correction_T_min   0.8214 
_exptl_absorpt_correction_T_max   0.8533 
_exptl_absorpt_process_details    'SADABS; Bruker, 2000' 
 
_exptl_special_details 
; 
 ? 
; 
 
_diffrn_ambient_temperature       293(2) 
_diffrn_radiation_wavelength      0.71073 
_diffrn_radiation_type            MoK\a 
_diffrn_radiation_source         'sealed tube'
_diffrn_radiation_monochromator  'graphite'
_diffrn_measurement_device_type  'Bruker Smart Apex CCD'
_diffrn_measurement_method       'phi and omega scans' 
_diffrn_detector_area_resol_mean  ? 
_diffrn_standards_number          ? 
_diffrn_standards_interval_count  ? 
_diffrn_standards_interval_time   ? 
_diffrn_standards_decay_%         ? 
_diffrn_reflns_number             167399 
_diffrn_reflns_av_R_equivalents   0.0910 
_diffrn_reflns_av_sigmaI/netI     0.0611 
_diffrn_reflns_limit_h_min        -49 
_diffrn_reflns_limit_h_max        46 
_diffrn_reflns_limit_k_min        -49 
_diffrn_reflns_limit_k_max        49 
_diffrn_reflns_limit_l_min        -36 
_diffrn_reflns_limit_l_max        49 
_diffrn_reflns_theta_min          1.77 
_diffrn_reflns_theta_max          25.98 
_reflns_number_total              10388 
_reflns_number_gt                 7401 
_reflns_threshold_expression      >2sigma(I) 
 
_computing_data_collection      'SMART (Bruker, 2000)'
_computing_cell_refinement      'SMART'
_computing_data_reduction       'SAINT (Bruker, 2000)'
_computing_structure_solution   'SHELXTL (Bruker, 2000)'
_computing_structure_refinement 'SHELXTL'
_computing_molecular_graphics   'SHELXTL'
_computing_publication_material 'SHELXTL'
 
_refine_special_details 
; 
 Refinement of F^2^ against ALL reflections.  The weighted R-factor wR and 
 goodness of fit S are based on F^2^, conventional R-factors R are based 
 on F, with F set to zero for negative F^2^. The threshold expression of 
 F^2^ > 2sigma(F^2^) is used only for calculating R-factors(gt) etc. and is 
 not relevant to the choice of reflections for refinement.  R-factors based 
 on F^2^ are statistically about twice as large as those based on F, and R- 
 factors based on ALL data will be even larger. 
; 
 
_refine_ls_structure_factor_coef  Fsqd  
_refine_ls_matrix_type            full 
_refine_ls_weighting_scheme       calc  
_refine_ls_weighting_details 
 'calc w=1/[\s^2^(Fo^2^)+(0.0341P)^2^+24.7485P] where P=(Fo^2^+2Fc^2^)/3' 
_atom_sites_solution_primary      direct 
_atom_sites_solution_secondary    difmap 
_atom_sites_solution_hydrogens    geom 
_refine_ls_hydrogen_treatment     constr 
_refine_ls_extinction_method      none 
_refine_ls_extinction_coef        ? 
_refine_ls_number_reflns          10388 
_refine_ls_number_parameters      465 
_refine_ls_number_restraints      0 
_refine_ls_R_factor_all           0.0831 
_refine_ls_R_factor_gt            0.0487 
_refine_ls_wR_factor_ref          0.0916 
_refine_ls_wR_factor_gt           0.0863 
_refine_ls_goodness_of_fit_ref    1.084 
_refine_ls_restrained_S_all       1.084 
_refine_ls_shift/su_max           0.064 
_refine_ls_shift/su_mean          0.000 
 
loop_ 
 _atom_site_label 
 _atom_site_type_symbol 
 _atom_site_fract_x 
 _atom_site_fract_y 
 _atom_site_fract_z 
 _atom_site_U_iso_or_equiv 
 _atom_site_adp_type 
 _atom_site_occupancy 
 _atom_site_symmetry_multiplicity 
 _atom_site_calc_flag 
 _atom_site_refinement_flags 
 _atom_site_disorder_assembly 
 _atom_site_disorder_group 
C1 C 0.13019(8) 0.54480(8) 0.94146(7) 0.0426(7) Uani 1 1 d . . . 
C2 C 0.16621(8) 0.53766(7) 0.94506(8) 0.0425(7) Uani 1 1 d . . . 
C3 C 0.18934(8) 0.56400(8) 0.94705(7) 0.0417(7) Uani 1 1 d . . . 
H3 H 0.1819 0.5861 0.9462 0.050 Uiso 1 1 calc R . . 
C4 C 0.22136(7) 0.55779(7) 0.95016(7) 0.0340(6) Uani 1 1 d . . . 
H4 H 0.2362 0.5758 0.9512 0.041 Uiso 1 1 calc R . . 
C5 C 0.23455(8) 0.52440(8) 0.95198(8) 0.0443(7) Uani 1 1 d . . . 
C6 C 0.21131(8) 0.49802(8) 0.94972(8) 0.0439(7) Uani 1 1 d . . . 
H6 H 0.2188 0.4759 0.9504 0.053 Uiso 1 1 calc R . . 
C7 C 0.17726(8) 0.50464(7) 0.94648(7) 0.0396(7) Uani 1 1 d . . . 
H7 H 0.1619 0.4871 0.9453 0.048 Uiso 1 1 calc R . . 
C8 C 0.42352(7) 0.50988(8) 0.98841(7) 0.0390(7) Uani 1 1 d . . . 
C9 C 0.38854(7) 0.51512(7) 0.97772(7) 0.0360(6) Uani 1 1 d . . . 
C10 C 0.36796(7) 0.48778(8) 0.97155(7) 0.0366(6) Uani 1 1 d . . . 
H10 H 0.3772 0.4664 0.9724 0.044 Uiso 1 1 calc R . . 
C11 C 0.33435(8) 0.49106(8) 0.96428(8) 0.0419(7) Uani 1 1 d . . . 
H11 H 0.3205 0.4726 0.9604 0.050 Uiso 1 1 calc R . . 
C12 C 0.32262(8) 0.52347(8) 0.96308(8) 0.0451(8) Uani 1 1 d . . . 
C13 C 0.34128(8) 0.55172(7) 0.96893(7) 0.0387(7) Uani 1 1 d . . . 
H13 H 0.3321 0.5731 0.9674 0.046 Uiso 1 1 calc R . . 
C14 C 0.37532(7) 0.54646(7) 0.97747(7) 0.0365(6) Uani 1 1 d . . . 
H14 H 0.3888 0.5647 0.9830 0.044 Uiso 1 1 calc R . . 
C15 C 0.21743(8) 0.39315(8) 0.93402(8) 0.0453(8) Uani 1 1 d . . . 
H15A H 0.2273 0.3842 0.9541 0.068 Uiso 1 1 calc R . . 
H15B H 0.1938 0.3965 0.9374 0.068 Uiso 1 1 calc R . . 
H15C H 0.2278 0.4142 0.9287 0.068 Uiso 1 1 calc R . . 
C16 C 0.22040(7) 0.38654(7) 0.86270(7) 0.0402(7) Uani 1 1 d . . . 
H16A H 0.2207 0.3709 0.8444 0.060 Uiso 1 1 calc R . . 
H16B H 0.2389 0.4018 0.8606 0.060 Uiso 1 1 calc R . . 
H16G H 0.1997 0.3989 0.8623 0.060 Uiso 1 1 calc R . . 
C17 C 0.36448(7) 0.41594(8) 0.92317(7) 0.0426(7) Uani 1 1 d . . . 
H17A H 0.3690 0.4044 0.9438 0.064 Uiso 1 1 calc R . . 
H17C H 0.3687 0.4395 0.9261 0.064 Uiso 1 1 calc R . . 
H17B H 0.3788 0.4073 0.9058 0.064 Uiso 1 1 calc R . . 
C18 C 0.30014(8) 0.44077(8) 0.89010(8) 0.0448(7) Uani 1 1 d . . . 
H18A H 0.2798 0.4459 0.9020 0.067 Uiso 1 1 calc R . . 
H18B H 0.2947 0.4327 0.8681 0.067 Uiso 1 1 calc R . . 
H18C H 0.3136 0.4607 0.8883 0.067 Uiso 1 1 calc R . . 
C19 C 0.16994(8) 0.27997(7) 0.81950(7) 0.0417(7) Uani 1 1 d . . . 
H19A H 0.1733 0.2579 0.8286 0.063 Uiso 1 1 calc R . . 
H19B H 0.1860 0.2841 0.8020 0.063 Uiso 1 1 calc R . . 
H19C H 0.1477 0.2816 0.8104 0.063 Uiso 1 1 calc R . . 
C20 C 0.14916(8) 0.34484(8) 0.84326(8) 0.0477(8) Uani 1 1 d . . . 
H20B H 0.1544 0.3538 0.8216 0.072 Uiso 1 1 calc R . . 
H20C H 0.1529 0.3617 0.8601 0.072 Uiso 1 1 calc R . . 
H20A H 0.1261 0.3380 0.8437 0.072 Uiso 1 1 calc R . . 
C21 C 0.28992(8) 0.56090(7) 0.78578(8) 0.0468(8) Uani 1 1 d . . . 
H21A H 0.3040 0.5777 0.7958 0.070 Uiso 1 1 calc R . . 
H21B H 0.2680 0.5701 0.7820 0.070 Uiso 1 1 calc R . . 
H21C H 0.2994 0.5539 0.7648 0.070 Uiso 1 1 calc R . . 
C22 C 0.25862(8) 0.49739(8) 0.79542(8) 0.0454(8) Uani 1 1 d . . . 
H22A H 0.2700 0.4839 0.7790 0.068 Uiso 1 1 calc R . . 
H22B H 0.2406 0.5094 0.7848 0.068 Uiso 1 1 calc R . . 
H22C H 0.2497 0.4832 0.8127 0.068 Uiso 1 1 calc R . . 
C23 C 0.19523(8) 0.60822(8) 0.86351(8) 0.0460(8) Uani 1 1 d . . . 
H23B H 0.1998 0.5980 0.8849 0.069 Uiso 1 1 calc R . . 
H23C H 0.1964 0.5915 0.8462 0.069 Uiso 1 1 calc R . . 
H23A H 0.1732 0.6179 0.8638 0.069 Uiso 1 1 calc R . . 
C24 C 0.25674(7) 0.63811(7) 0.88655(8) 0.0391(7) Uani 1 1 d . . . 
H24A H 0.2726 0.6559 0.8829 0.059 Uiso 1 1 calc R . . 
H24B H 0.2680 0.6169 0.8853 0.059 Uiso 1 1 calc R . . 
H24C H 0.2467 0.6406 0.9083 0.059 Uiso 1 1 calc R . . 
Ce1 Ce 0.5000 0.5000 1.0000 0.04242(11) Uani 1 6 d S . . 
Ce2 Ce 0.058565(4) 0.558565(4) 0.941435(4) 0.04166(9) Uani 1 3 d S . . 
N1 N 0.26578(7) 0.51104(7) 0.95544(6) 0.0451(6) Uani 1 1 d . . . 
H1 H 0.2692 0.4897 0.9562 0.054 Uiso 0.50 1 calc PR . . 
N2 N 0.28967(7) 0.53226(7) 0.95749(6) 0.0468(6) Uani 1 1 d . . . 
H2 H 0.2849 0.5532 0.9553 0.056 Uiso 0.50 1 calc PR . . 
O1 O 0.43713(5) 0.48128(5) 0.98506(5) 0.0387(5) Uani 1 1 d . . . 
O2 O 0.43971(5) 0.53433(5) 1.00050(5) 0.0406(5) Uani 1 1 d . . . 
O3 O 0.10937(5) 0.51975(5) 0.93979(5) 0.0356(5) Uani 1 1 d . . . 
O4 O 0.12043(5) 0.57403(5) 0.94324(4) 0.0319(4) Uani 1 1 d . . . 
O5 O 0.26058(6) 0.35843(6) 0.90630(6) 0.0512(6) Uani 1 1 d . . . 
O6 O 0.30928(5) 0.40862(5) 0.94763(5) 0.0479(5) Uani 1 1 d . . . 
O7 O 0.16805(5) 0.29352(5) 0.88499(5) 0.0374(5) Uani 1 1 d . . . 
O8 O 0.26634(5) 0.53783(5) 0.84266(5) 0.0395(5) Uani 1 1 d . . . 
O9 O 0.23807(5) 0.64335(5) 0.81995(5) 0.0458(5) Uani 1 1 d . . . 
O10 O 0.21104(11) 0.47056(10) 0.85240(11) 0.0400(11) Uani 0.45 1 d P . . 
H10D H 0.1916 0.4765 0.8587 0.048 Uiso 0.45 1 d PR . . 
H10C H 0.2208 0.4602 0.8683 0.048 Uiso 0.45 1 d PR . . 
O11 O 0.38160(11) 0.50015(10) 0.88169(11) 0.0405(10) Uani 0.45 1 d P . . 
H11B H 0.3962 0.4850 0.8959 0.049 Uiso 0.45 1 d PR . . 
H11C H 0.3640 0.4909 0.8636 0.049 Uiso 0.45 1 d PR . . 
O12 O 0.17539(12) 0.43952(11) 0.82060(12) 0.0449(11) Uani 0.45 1 d P . . 
H12X H 0.1871 0.4297 0.8057 0.054 Uiso 0.45 1 d PR . . 
H12Y H 0.1580 0.4480 0.8115 0.054 Uiso 0.45 1 d PR . . 
O13 O 0.12203(12) 0.49834(12) 0.87982(12) 0.0495(12) Uani 0.45 1 d P . . 
H13D H 0.1241 0.5111 0.8968 0.059 Uiso 0.45 1 d PR . . 
H13C H 0.1141 0.5095 0.8635 0.059 Uiso 0.45 1 d PR . . 
O14 O 0.2500 0.35325(7) 1.0000 0.0370(7) Uani 0.90 2 d SP . . 
H14A H 0.2705 0.3486 0.9963 0.044 Uiso 0.45 1 d PR . . 
H14B H 0.2378 0.3366 0.9945 0.044 Uiso 0.45 1 d PR . . 
O15 O 0.12905(10) 0.41894(10) 0.95424(10) 0.0342(10) Uani 0.45 1 d P . . 
H15D H 0.1365 0.4132 0.9734 0.041 Uiso 0.45 1 d PR . . 
H15E H 0.1419 0.4119 0.9387 0.041 Uiso 0.45 1 d PR . . 
O16 O 0.15455(12) 0.75722(12) 0.79236(11) 0.0479(12) Uani 0.45 1 d P . . 
H16C H 0.1634 0.7764 0.7893 0.058 Uiso 0.45 1 d PR . . 
H16E H 0.1699 0.7425 0.7937 0.058 Uiso 0.45 1 d PR . . 
O17 O 0.29628(11) 0.53413(11) 0.89100(12) 0.0475(12) Uani 0.45 1 d P . . 
H17D H 0.3079 0.5253 0.9066 0.057 Uiso 0.45 1 d PR . . 
H17E H 0.2976 0.5221 0.8734 0.057 Uiso 0.45 1 d PR . . 
O18 O 0.12127(11) 0.74519(12) 0.74937(10) 0.0395(11) Uani 0.45 1 d P . . 
H18F H 0.1208 0.7241 0.7521 0.047 Uiso 0.45 1 d PR . . 
H18D H 0.1383 0.7474 0.7368 0.047 Uiso 0.45 1 d PR . . 
O19 O 0.23384(11) 0.65804(12) 0.97425(12) 0.0464(12) Uani 0.45 1 d P . . 
H19E H 0.2318 0.6738 0.9600 0.070 Uiso 0.45 1 d PR . . 
H19F H 0.2302 0.6656 0.9938 0.070 Uiso 0.45 1 d PR . . 
O20 O 0.22387(5) 0.27613(5) 0.72387(5) 0.0407(8) Uani 1 3 d S . . 
H20X H 0.2289 0.2631 0.7399 0.049 Uiso 0.33 1 d PR . . 
H20Y H 0.2050 0.2705 0.7156 0.049 Uiso 0.33 1 d PR . . 
S1 S 0.22365(2) 0.36479(2) 0.90063(2) 0.0463(2) Uani 1 1 d . . . 
S2 S 0.32243(2) 0.409965(19) 0.91186(2) 0.04281(18) Uani 1 1 d . . . 
S3 S 0.17500(2) 0.30983(2) 0.851379(19) 0.04576(19) Uani 1 1 d . . . 
S4 S 0.28688(2) 0.52588(2) 0.81303(2) 0.0486(2) Uani 1 1 d . . . 
S5 S 0.22526(2) 0.63988(2) 0.85555(2) 0.0514(2) Uani 1 1 d . . . 
 
loop_ 
 _atom_site_aniso_label 
 _atom_site_aniso_U_11 
 _atom_site_aniso_U_22 
 _atom_site_aniso_U_33 
 _atom_site_aniso_U_23 
 _atom_site_aniso_U_13 
 _atom_site_aniso_U_12 
C1 0.0475(18) 0.0401(18) 0.0402(17) -0.0061(14) 0.0137(14) -0.0034(14) 
C2 0.0510(18) 0.0305(16) 0.0460(18) 0.0005(13) 0.0108(14) 0.0007(13) 
C3 0.0372(17) 0.0488(19) 0.0391(17) -0.0132(14) -0.0024(13) 0.0083(13) 
C4 0.0403(16) 0.0324(15) 0.0293(14) -0.0031(11) 0.0050(12) -0.0129(12) 
C5 0.0421(18) 0.0444(18) 0.0463(18) 0.0007(14) 0.0166(14) -0.0019(14) 
C6 0.0488(19) 0.0345(16) 0.0485(19) 0.0087(13) 0.0088(14) 0.0168(14) 
C7 0.0415(17) 0.0342(16) 0.0432(17) -0.0125(13) 0.0131(13) -0.0184(13) 
C8 0.0391(17) 0.0406(17) 0.0373(16) -0.0062(13) 0.0106(13) 0.0002(13) 
C9 0.0386(16) 0.0371(16) 0.0323(15) -0.0009(12) 0.0081(12) -0.0048(12) 
C10 0.0411(17) 0.0422(17) 0.0263(15) 0.0021(12) 0.0086(12) 0.0036(13) 
C11 0.0408(17) 0.0391(17) 0.0457(18) 0.0113(13) -0.0006(13) -0.0093(13) 
C12 0.0356(17) 0.0505(19) 0.0492(19) -0.0033(15) -0.0027(13) 0.0055(14) 
C13 0.0454(18) 0.0388(16) 0.0320(15) 0.0069(12) -0.0021(13) -0.0036(13) 
C14 0.0344(16) 0.0377(16) 0.0373(16) 0.0041(12) -0.0117(12) 0.0015(12) 
C15 0.0490(19) 0.0467(19) 0.0402(18) -0.0050(14) 0.0189(14) -0.0053(15) 
C16 0.0390(17) 0.0422(17) 0.0395(17) 0.0036(13) 0.0193(13) -0.0034(13) 
C17 0.0411(18) 0.0524(19) 0.0342(16) -0.0042(14) 0.0134(13) -0.0046(14) 
C18 0.0442(18) 0.0439(18) 0.0463(19) -0.0005(14) 0.0132(14) 0.0012(14) 
C19 0.0454(18) 0.0401(17) 0.0396(17) -0.0054(13) 0.0057(13) -0.0120(14) 
C20 0.0472(18) 0.0437(18) 0.0524(19) -0.0241(14) 0.0310(15) -0.0202(14) 
C21 0.0497(19) 0.0411(18) 0.0497(19) -0.0212(14) 0.0315(15) -0.0179(14) 
C22 0.0502(19) 0.0410(18) 0.0449(18) 0.0076(14) -0.0025(14) -0.0049(14) 
C23 0.0444(18) 0.0457(18) 0.0478(19) -0.0094(14) 0.0160(14) -0.0132(14) 
C24 0.0361(16) 0.0301(15) 0.0513(18) 0.0154(13) 0.0038(13) 0.0024(12) 
Ce1 0.04242(11) 0.04242(11) 0.04242(11) 0.00170(11) -0.00170(11) -0.00170(11) 
Ce2 0.04166(9) 0.04166(9) 0.04166(9) 0.00220(7) 0.00220(7) -0.00220(7) 
N1 0.0457(16) 0.0513(16) 0.0384(14) -0.0147(12) 0.0013(12) 0.0210(13) 
N2 0.0485(16) 0.0515(17) 0.0406(15) 0.0056(12) 0.0113(12) -0.0124(13) 
O1 0.0355(11) 0.0390(12) 0.0417(12) -0.0159(9) 0.0074(9) -0.0037(9) 
O2 0.0508(13) 0.0327(11) 0.0382(11) 0.0095(9) 0.0023(9) 0.0001(9) 
O3 0.0407(11) 0.0323(11) 0.0338(11) -0.0189(8) 0.0022(8) 0.0101(8) 
O4 0.0369(11) 0.0316(10) 0.0272(10) -0.0028(8) 0.0066(8) -0.0106(8) 
O5 0.0549(14) 0.0485(13) 0.0502(14) -0.0053(10) 0.0232(11) -0.0020(10) 
O6 0.0427(12) 0.0504(13) 0.0506(13) 0.0088(10) 0.0093(10) -0.0048(10) 
O7 0.0333(11) 0.0356(11) 0.0434(12) -0.0155(9) -0.0035(8) 0.0022(8) 
O8 0.0344(11) 0.0462(12) 0.0379(11) -0.0071(9) 0.0117(8) -0.0102(9) 
O9 0.0371(11) 0.0524(13) 0.0480(13) 0.0087(10) 0.0082(9) -0.0057(10) 
O10 0.047(3) 0.029(2) 0.045(3) -0.0120(19) 0.011(2) -0.0168(19) 
O11 0.043(3) 0.035(2) 0.044(3) -0.005(2) 0.006(2) -0.0073(19) 
O12 0.045(3) 0.042(3) 0.048(3) 0.004(2) 0.010(2) 0.003(2) 
O13 0.058(3) 0.046(3) 0.045(3) 0.016(2) 0.000(2) 0.004(2) 
O14 0.0410(18) 0.0342(17) 0.0359(17) 0.000 0.0100(13) 0.000 
O15 0.039(2) 0.031(2) 0.033(2) -0.0008(17) 0.0125(19) -0.0117(18) 
O16 0.057(3) 0.047(3) 0.039(3) 0.002(2) 0.012(2) -0.014(2) 
O17 0.042(3) 0.051(3) 0.050(3) 0.028(2) -0.022(2) -0.006(2) 
O18 0.036(2) 0.054(3) 0.028(2) 0.006(2) 0.0064(18) 0.006(2) 
O19 0.048(3) 0.047(3) 0.044(3) -0.010(2) 0.006(2) 0.008(2) 
O20 0.0407(8) 0.0407(8) 0.0407(8) -0.0074(10) 0.0074(10) -0.0074(10) 
S1 0.0522(5) 0.0486(5) 0.0382(4) -0.0067(3) -0.0104(3) -0.0101(4) 
S2 0.0482(5) 0.0358(4) 0.0444(4) -0.0010(3) 0.0128(3) -0.0126(3) 
S3 0.0442(5) 0.0600(5) 0.0332(4) -0.0041(3) 0.0062(3) 0.0128(4) 
S4 0.0439(5) 0.0487(5) 0.0532(5) -0.0067(4) 0.0016(4) -0.0141(4) 
S5 0.0394(4) 0.0359(4) 0.0789(6) -0.0082(4) 0.0091(4) 0.0050(3) 
 
_geom_special_details 
; 
 All esds (except the esd in the dihedral angle between two l.s. planes) 
 are estimated using the full covariance matrix.  The cell esds are taken 
 into account individually in the estimation of esds in distances, angles 
 and torsion angles; correlations between esds in cell parameters are only 
 used when they are defined by crystal symmetry.  An approximate (isotropic) 
 treatment of cell esds is used for estimating esds involving l.s. planes. 
; 
 
loop_ 
 _geom_bond_atom_site_label_1 
 _geom_bond_atom_site_label_2 
 _geom_bond_distance 
 _geom_bond_site_symmetry_2 
 _geom_bond_publ_flag 
C1 O4 1.230(4) . ? 
C1 O3 1.300(4) . ? 
C1 C2 1.471(4) . ? 
C1 Ce2 2.907(3) . ? 
C2 C7 1.389(4) . ? 
C2 C3 1.399(4) . ? 
C3 C4 1.306(4) . ? 
C3 H3 0.9300 . ? 
C4 C5 1.433(4) . ? 
C4 H4 0.9300 . ? 
C5 N1 1.361(4) . ? 
C5 C6 1.404(4) . ? 
C6 C7 1.389(4) . ? 
C6 H6 0.9300 . ? 
C7 H7 0.9300 . ? 
C8 O2 1.264(3) . ? 
C8 O1 1.269(3) . ? 
C8 C9 1.473(4) . ? 
C9 C14 1.356(4) . ? 
C9 C10 1.386(4) . ? 
C10 C11 1.377(4) . ? 
C10 H10 0.9300 . ? 
C11 C12 1.374(4) . ? 
C11 H11 0.9300 . ? 
C12 C13 1.370(4) . ? 
C12 N2 1.377(4) . ? 
C13 C14 1.414(4) . ? 
C13 H13 0.9300 . ? 
C14 H14 0.9300 . ? 
C15 S1 1.763(3) . ? 
C15 H15A 0.9600 . ? 
C15 H15B 0.9600 . ? 
C15 H15C 0.9600 . ? 
C16 S1 1.747(3) . ? 
C16 H16A 0.9600 . ? 
C16 H16B 0.9600 . ? 
C16 H16G 0.9600 . ? 
C17 S2 1.752(3) . ? 
C17 H17A 0.9600 . ? 
C17 H17C 0.9600 . ? 
C17 H17B 0.9600 . ? 
C18 S2 1.746(3) . ? 
C18 H18A 0.9600 . ? 
C18 H18B 0.9600 . ? 
C18 H18C 0.9600 . ? 
C19 S3 1.752(3) . ? 
C19 H19A 0.9600 . ? 
C19 H19B 0.9600 . ? 
C19 H19C 0.9600 . ? 
C20 S3 1.764(4) . ? 
C20 H20B 0.9600 . ? 
C20 H20C 0.9600 . ? 
C20 H20A 0.9600 . ? 
C21 S4 1.773(3) . ? 
C21 H21A 0.9600 . ? 
C21 H21B 0.9600 . ? 
C21 H21C 0.9600 . ? 
C22 S4 1.746(3) . ? 
C22 H22A 0.9600 . ? 
C22 H22B 0.9600 . ? 
C22 H22C 0.9600 . ? 
C23 S5 1.768(3) . ? 
C23 H23B 0.9600 . ? 
C23 H23C 0.9600 . ? 
C23 H23A 0.9600 . ? 
C24 S5 1.762(3) . ? 
C24 H24A 0.9600 . ? 
C24 H24B 0.9600 . ? 
C24 H24C 0.9600 . ? 
Ce1 O1 2.6813(19) 7_665 ? 
Ce1 O1 2.6813(19) 25_667 ? 
Ce1 O1 2.6813(18) 34_576 ? 
Ce1 O1 2.6813(19) . ? 
Ce1 O1 2.6813(19) 10_646 ? 
Ce1 O1 2.6813(19) 31_557 ? 
Ce1 O2 2.765(2) 7_665 ? 
Ce1 O2 2.765(2) 34_576 ? 
Ce1 O2 2.765(2) . ? 
Ce1 O2 2.765(2) 31_557 ? 
Ce1 O2 2.765(2) 25_667 ? 
Ce1 O2 2.765(2) 10_646 ? 
Ce2 O2 2.509(2) 15_546 ? 
Ce2 O2 2.509(2) 18_356 ? 
Ce2 O2 2.509(2) 21_445 ? 
Ce2 O4 2.5424(18) 8_656 ? 
Ce2 O4 2.5424(18) 11_466 ? 
Ce2 O4 2.5424(18) . ? 
Ce2 O3 2.5489(18) 8_656 ? 
Ce2 O3 2.5489(18) 11_466 ? 
Ce2 O3 2.5489(18) . ? 
Ce2 C1 2.907(3) 8_656 ? 
Ce2 C1 2.907(3) 11_466 ? 
N1 N2 1.276(4) . ? 
N1 H1 0.8600 . ? 
N2 H2 0.8600 . ? 
O2 Ce2 2.509(2) 15_546 ? 
O5 S1 1.510(2) . ? 
O6 S2 1.520(2) . ? 
O7 S3 1.514(2) . ? 
O8 S4 1.514(2) . ? 
O9 S5 1.514(2) . ? 
O10 H10D 0.8496 . ? 
O10 H10C 0.8501 . ? 
O11 H11B 1.0114 . ? 
O11 H11C 1.0718 . ? 
O12 H12X 0.8499 . ? 
O12 H12Y 0.8501 . ? 
O13 H13D 0.8500 . ? 
O13 H13C 0.8500 . ? 
O14 H14A 0.8498 . ? 
O14 H14B 0.8501 . ? 
O15 H15D 0.8497 . ? 
O15 H15E 0.8499 . ? 
O16 H16C 0.8500 . ? 
O16 H16E 0.8500 . ? 
O17 H17D 0.8500 . ? 
O17 H17E 0.8502 . ? 
O18 H18F 0.8499 . ? 
O18 H18D 0.8501 . ? 
O19 H19E 0.8497 . ? 
O19 H19F 0.8501 . ? 
O20 H20X 0.8459 . ? 
O20 H20Y 0.8505 . ? 
 
loop_ 
 _geom_angle_atom_site_label_1 
 _geom_angle_atom_site_label_2 
 _geom_angle_atom_site_label_3 
 _geom_angle 
 _geom_angle_site_symmetry_1 
 _geom_angle_site_symmetry_3 
 _geom_angle_publ_flag 
O4 C1 O3 121.9(3) . . ? 
O4 C1 C2 119.1(3) . . ? 
O3 C1 C2 118.7(3) . . ? 
O4 C1 Ce2 60.72(16) . . ? 
O3 C1 Ce2 61.19(15) . . ? 
C2 C1 Ce2 174.4(2) . . ? 
C7 C2 C3 120.0(3) . . ? 
C7 C2 C1 119.8(3) . . ? 
C3 C2 C1 120.2(3) . . ? 
C4 C3 C2 120.4(3) . . ? 
C4 C3 H3 119.8 . . ? 
C2 C3 H3 119.8 . . ? 
C3 C4 C5 122.7(3) . . ? 
C3 C4 H4 118.7 . . ? 
C5 C4 H4 118.7 . . ? 
N1 C5 C6 108.5(3) . . ? 
N1 C5 C4 134.8(3) . . ? 
C6 C5 C4 116.8(3) . . ? 
C7 C6 C5 120.5(3) . . ? 
C7 C6 H6 119.7 . . ? 
C5 C6 H6 119.7 . . ? 
C6 C7 C2 119.6(3) . . ? 
C6 C7 H7 120.2 . . ? 
C2 C7 H7 120.2 . . ? 
O2 C8 O1 120.9(3) . . ? 
O2 C8 C9 119.0(3) . . ? 
O1 C8 C9 120.1(3) . . ? 
C14 C9 C10 119.5(3) . . ? 
C14 C9 C8 120.1(3) . . ? 
C10 C9 C8 120.0(3) . . ? 
C11 C10 C9 122.6(3) . . ? 
C11 C10 H10 118.7 . . ? 
C9 C10 H10 118.7 . . ? 
C12 C11 C10 115.3(3) . . ? 
C12 C11 H11 122.3 . . ? 
C10 C11 H11 122.3 . . ? 
C13 C12 C11 125.6(3) . . ? 
C13 C12 N2 109.6(3) . . ? 
C11 C12 N2 124.7(3) . . ? 
C12 C13 C14 116.1(3) . . ? 
C12 C13 H13 121.9 . . ? 
C14 C13 H13 121.9 . . ? 
C9 C14 C13 120.8(3) . . ? 
C9 C14 H14 119.6 . . ? 
C13 C14 H14 119.6 . . ? 
S1 C15 H15A 109.5 . . ? 
S1 C15 H15B 109.5 . . ? 
H15A C15 H15B 109.5 . . ? 
S1 C15 H15C 109.5 . . ? 
H15A C15 H15C 109.5 . . ? 
H15B C15 H15C 109.5 . . ? 
S1 C16 H16A 109.5 . . ? 
S1 C16 H16B 109.5 . . ? 
H16A C16 H16B 109.5 . . ? 
S1 C16 H16G 109.5 . . ? 
H16A C16 H16G 109.5 . . ? 
H16B C16 H16G 109.5 . . ? 
S2 C17 H17A 109.5 . . ? 
S2 C17 H17C 109.5 . . ? 
H17A C17 H17C 109.5 . . ? 
S2 C17 H17B 109.5 . . ? 
H17A C17 H17B 109.5 . . ? 
H17C C17 H17B 109.5 . . ? 
S2 C18 H18A 109.5 . . ? 
S2 C18 H18B 109.5 . . ? 
H18A C18 H18B 109.5 . . ? 
S2 C18 H18C 109.5 . . ? 
H18A C18 H18C 109.5 . . ? 
H18B C18 H18C 109.5 . . ? 
S3 C19 H19A 109.5 . . ? 
S3 C19 H19B 109.5 . . ? 
H19A C19 H19B 109.5 . . ? 
S3 C19 H19C 109.5 . . ? 
H19A C19 H19C 109.5 . . ? 
H19B C19 H19C 109.5 . . ? 
S3 C20 H20B 109.5 . . ? 
S3 C20 H20C 109.5 . . ? 
H20B C20 H20C 109.5 . . ? 
S3 C20 H20A 109.5 . . ? 
H20B C20 H20A 109.5 . . ? 
H20C C20 H20A 109.5 . . ? 
S4 C21 H21A 109.5 . . ? 
S4 C21 H21B 109.5 . . ? 
H21A C21 H21B 109.5 . . ? 
S4 C21 H21C 109.5 . . ? 
H21A C21 H21C 109.5 . . ? 
H21B C21 H21C 109.5 . . ? 
S4 C22 H22A 109.5 . . ? 
S4 C22 H22B 109.5 . . ? 
H22A C22 H22B 109.5 . . ? 
S4 C22 H22C 109.5 . . ? 
H22A C22 H22C 109.5 . . ? 
H22B C22 H22C 109.5 . . ? 
S5 C23 H23B 109.5 . . ? 
S5 C23 H23C 109.5 . . ? 
H23B C23 H23C 109.5 . . ? 
S5 C23 H23A 109.5 . . ? 
H23B C23 H23A 109.5 . . ? 
H23C C23 H23A 109.5 . . ? 
S5 C24 H24A 109.5 . . ? 
S5 C24 H24B 109.5 . . ? 
H24A C24 H24B 109.5 . . ? 
S5 C24 H24C 109.5 . . ? 
H24A C24 H24C 109.5 . . ? 
H24B C24 H24C 109.5 . . ? 
O1 Ce1 O1 66.06(3) 7_665 25_667 ? 
O1 Ce1 O1 66.06(3) 7_665 34_576 ? 
O1 Ce1 O1 113.94(3) 25_667 34_576 ? 
O1 Ce1 O1 113.94(3) 7_665 . ? 
O1 Ce1 O1 180.00(3) 25_667 . ? 
O1 Ce1 O1 66.06(3) 34_576 . ? 
O1 Ce1 O1 113.94(3) 7_665 10_646 ? 
O1 Ce1 O1 66.06(3) 25_667 10_646 ? 
O1 Ce1 O1 180.0 34_576 10_646 ? 
O1 Ce1 O1 113.94(3) . 10_646 ? 
O1 Ce1 O1 180.0 7_665 31_557 ? 
O1 Ce1 O1 113.94(3) 25_667 31_557 ? 
O1 Ce1 O1 113.94(3) 34_576 31_557 ? 
O1 Ce1 O1 66.06(3) . 31_557 ? 
O1 Ce1 O1 66.06(3) 10_646 31_557 ? 
O1 Ce1 O2 47.72(6) 7_665 7_665 ? 
O1 Ce1 O2 69.82(6) 25_667 7_665 ? 
O1 Ce1 O2 105.51(6) 34_576 7_665 ? 
O1 Ce1 O2 110.18(6) . 7_665 ? 
O1 Ce1 O2 74.49(6) 10_646 7_665 ? 
O1 Ce1 O2 132.28(6) 31_557 7_665 ? 
O1 Ce1 O2 69.82(6) 7_665 34_576 ? 
O1 Ce1 O2 74.49(6) 25_667 34_576 ? 
O1 Ce1 O2 47.72(6) 34_576 34_576 ? 
O1 Ce1 O2 105.51(6) . 34_576 ? 
O1 Ce1 O2 132.28(6) 10_646 34_576 ? 
O1 Ce1 O2 110.18(6) 31_557 34_576 ? 
O2 Ce1 O2 116.09(7) 7_665 34_576 ? 
O1 Ce1 O2 74.49(6) 7_665 . ? 
O1 Ce1 O2 132.28(6) 25_667 . ? 
O1 Ce1 O2 69.82(6) 34_576 . ? 
O1 Ce1 O2 47.72(6) . . ? 
O1 Ce1 O2 110.18(6) 10_646 . ? 
O1 Ce1 O2 105.51(6) 31_557 . ? 
O2 Ce1 O2 63.91(7) 7_665 . ? 
O2 Ce1 O2 116.09(7) 34_576 . ? 
O1 Ce1 O2 132.28(6) 7_665 31_557 ? 
O1 Ce1 O2 110.18(6) 25_667 31_557 ? 
O1 Ce1 O2 74.49(6) 34_576 31_557 ? 
O1 Ce1 O2 69.82(6) . 31_557 ? 
O1 Ce1 O2 105.51(6) 10_646 31_557 ? 
O1 Ce1 O2 47.72(6) 31_557 31_557 ? 
O2 Ce1 O2 180.00(4) 7_665 31_557 ? 
O2 Ce1 O2 63.91(7) 34_576 31_557 ? 
O2 Ce1 O2 116.09(7) . 31_557 ? 
O1 Ce1 O2 105.51(6) 7_665 25_667 ? 
O1 Ce1 O2 47.72(6) 25_667 25_667 ? 
O1 Ce1 O2 110.18(6) 34_576 25_667 ? 
O1 Ce1 O2 132.28(6) . 25_667 ? 
O1 Ce1 O2 69.82(6) 10_646 25_667 ? 
O1 Ce1 O2 74.49(6) 31_557 25_667 ? 
O2 Ce1 O2 116.09(7) 7_665 25_667 ? 
O2 Ce1 O2 63.91(7) 34_576 25_667 ? 
O2 Ce1 O2 180.00(8) . 25_667 ? 
O2 Ce1 O2 63.91(7) 31_557 25_667 ? 
O1 Ce1 O2 110.18(6) 7_665 10_646 ? 
O1 Ce1 O2 105.51(6) 25_667 10_646 ? 
O1 Ce1 O2 132.28(6) 34_576 10_646 ? 
O1 Ce1 O2 74.49(6) . 10_646 ? 
O1 Ce1 O2 47.72(6) 10_646 10_646 ? 
O1 Ce1 O2 69.82(6) 31_557 10_646 ? 
O2 Ce1 O2 63.91(7) 7_665 10_646 ? 
O2 Ce1 O2 180.0 34_576 10_646 ? 
O2 Ce1 O2 63.91(7) . 10_646 ? 
O2 Ce1 O2 116.09(7) 31_557 10_646 ? 
O2 Ce1 O2 116.09(7) 25_667 10_646 ? 
O2 Ce2 O2 71.37(7) 15_546 18_356 ? 
O2 Ce2 O2 71.37(7) 15_546 21_445 ? 
O2 Ce2 O2 71.37(7) 18_356 21_445 ? 
O2 Ce2 O4 126.71(6) 15_546 8_656 ? 
O2 Ce2 O4 92.33(6) 18_356 8_656 ? 
O2 Ce2 O4 151.29(6) 21_445 8_656 ? 
O2 Ce2 O4 151.29(6) 15_546 11_466 ? 
O2 Ce2 O4 126.71(6) 18_356 11_466 ? 
O2 Ce2 O4 92.33(6) 21_445 11_466 ? 
O4 Ce2 O4 78.42(6) 8_656 11_466 ? 
O2 Ce2 O4 92.33(6) 15_546 . ? 
O2 Ce2 O4 151.29(6) 18_356 . ? 
O2 Ce2 O4 126.71(6) 21_445 . ? 
O4 Ce2 O4 78.42(6) 8_656 . ? 
O4 Ce2 O4 78.42(6) 11_466 . ? 
O2 Ce2 O3 75.24(6) 15_546 8_656 ? 
O2 Ce2 O3 76.61(6) 18_356 8_656 ? 
O2 Ce2 O3 139.40(7) 21_445 8_656 ? 
O4 Ce2 O3 51.50(6) 8_656 8_656 ? 
O4 Ce2 O3 127.21(6) 11_466 8_656 ? 
O4 Ce2 O3 76.43(6) . 8_656 ? 
O2 Ce2 O3 139.40(7) 15_546 11_466 ? 
O2 Ce2 O3 75.24(6) 18_356 11_466 ? 
O2 Ce2 O3 76.61(6) 21_445 11_466 ? 
O4 Ce2 O3 76.43(6) 8_656 11_466 ? 
O4 Ce2 O3 51.50(6) 11_466 11_466 ? 
O4 Ce2 O3 127.21(6) . 11_466 ? 
O3 Ce2 O3 118.507(19) 8_656 11_466 ? 
O2 Ce2 O3 76.61(6) 15_546 . ? 
O2 Ce2 O3 139.40(7) 18_356 . ? 
O2 Ce2 O3 75.24(6) 21_445 . ? 
O4 Ce2 O3 127.21(6) 8_656 . ? 
O4 Ce2 O3 76.43(6) 11_466 . ? 
O4 Ce2 O3 51.50(6) . . ? 
O3 Ce2 O3 118.507(19) 8_656 . ? 
O3 Ce2 O3 118.507(19) 11_466 . ? 
O2 Ce2 C1 101.77(8) 15_546 8_656 ? 
O2 Ce2 C1 84.27(8) 18_356 8_656 ? 
O2 Ce2 C1 155.64(7) 21_445 8_656 ? 
O4 Ce2 C1 24.96(7) 8_656 8_656 ? 
O4 Ce2 C1 102.18(7) 11_466 8_656 ? 
O4 Ce2 C1 75.93(7) . 8_656 ? 
O3 Ce2 C1 26.54(7) 8_656 8_656 ? 
O3 Ce2 C1 97.15(7) 11_466 8_656 ? 
O3 Ce2 C1 126.95(7) . 8_656 ? 
O2 Ce2 C1 155.64(8) 15_546 11_466 ? 
O2 Ce2 C1 101.77(8) 18_356 11_466 ? 
O2 Ce2 C1 84.27(8) 21_445 11_466 ? 
O4 Ce2 C1 75.93(7) 8_656 11_466 ? 
O4 Ce2 C1 24.96(7) 11_466 11_466 ? 
O4 Ce2 C1 102.18(7) . 11_466 ? 
O3 Ce2 C1 126.95(7) 8_656 11_466 ? 
O3 Ce2 C1 26.54(7) 11_466 11_466 ? 
O3 Ce2 C1 97.15(7) . 11_466 ? 
C1 Ce2 C1 100.70(8) 8_656 11_466 ? 
O2 Ce2 C1 84.27(8) 15_546 . ? 
O2 Ce2 C1 155.64(7) 18_356 . ? 
O2 Ce2 C1 101.77(8) 21_445 . ? 
O4 Ce2 C1 102.18(7) 8_656 . ? 
O4 Ce2 C1 75.93(7) 11_466 . ? 
O4 Ce2 C1 24.96(7) . . ? 
O3 Ce2 C1 97.15(7) 8_656 . ? 
O3 Ce2 C1 126.95(7) 11_466 . ? 
O3 Ce2 C1 26.54(7) . . ? 
C1 Ce2 C1 100.70(8) 8_656 . ? 
C1 Ce2 C1 100.70(8) 11_466 . ? 
N2 N1 C5 115.4(3) . . ? 
N2 N1 H1 122.3 . . ? 
C5 N1 H1 122.3 . . ? 
N1 N2 C12 123.6(3) . . ? 
N1 N2 H2 118.2 . . ? 
C12 N2 H2 118.2 . . ? 
C8 O1 Ce1 97.24(17) . . ? 
C8 O2 Ce2 131.48(18) . 15_546 ? 
C8 O2 Ce1 93.41(17) . . ? 
Ce2 O2 Ce1 99.98(7) 15_546 . ? 
C1 O3 Ce2 92.27(17) . . ? 
C1 O4 Ce2 94.32(17) . . ? 
H10D O10 H10C 109.5 . . ? 
H11B O11 H11C 123.3 . . ? 
H12X O12 H12Y 109.5 . . ? 
H13D O13 H13C 109.5 . . ? 
H14A O14 H14B 109.5 . . ? 
H15D O15 H15E 110.9 . . ? 
H16C O16 H16E 109.4 . . ? 
H17D O17 H17E 109.5 . . ? 
H18F O18 H18D 101.3 . . ? 
H19E O19 H19F 109.5 . . ? 
H20X O20 H20Y 109.8 . . ? 
O5 S1 C16 106.55(14) . . ? 
O5 S1 C15 97.58(14) . . ? 
C16 S1 C15 108.92(16) . . ? 
O6 S2 C18 108.37(14) . . ? 
O6 S2 C17 95.35(13) . . ? 
C18 S2 C17 121.26(16) . . ? 
O7 S3 C19 109.19(13) . . ? 
O7 S3 C20 113.27(12) . . ? 
C19 S3 C20 109.70(15) . . ? 
O8 S4 C22 99.76(14) . . ? 
O8 S4 C21 105.49(13) . . ? 
C22 S4 C21 108.05(15) . . ? 
O9 S5 C24 114.87(13) . . ? 
O9 S5 C23 117.48(14) . . ? 
C24 S5 C23 109.12(16) . . ? 
 
_diffrn_measured_fraction_theta_max    1.000 
_diffrn_reflns_theta_full              25.98 
_diffrn_measured_fraction_theta_full   1.000 
_refine_diff_density_max    0.809 
_refine_diff_density_min   -0.512 
_refine_diff_density_rms    0.051 

#===END


data_12Ce
_database_code_depnum_ccdc_archive 'CCDC 746328'
_audit_creation_method           SHELXL-2000
_chemical_name_systematic        
;
?
; 
_chemical_name_common             ? 
_chemical_melting_point           ? 
_chemical_formula_moiety          'C42 H30 Ce2 N6 O15'  
_chemical_formula_sum 
 'C42 H30 Ce2 N6 O15' 
_chemical_formula_weight          1138.96 
 
loop_ 
 _atom_type_symbol 
 _atom_type_description 
 _atom_type_scat_dispersion_real 
 _atom_type_scat_dispersion_imag 
 _atom_type_scat_source 
 'C'  'C'   0.0033   0.0016 
 'International Tables Vol C Tables 4.2.6.8 and 6.1.1.4' 
 'H'  'H'   0.0000   0.0000 
 'International Tables Vol C Tables 4.2.6.8 and 6.1.1.4' 
 'N'  'N'   0.0061   0.0033 
 'International Tables Vol C Tables 4.2.6.8 and 6.1.1.4' 
 'O'  'O'   0.0106   0.0060 
 'International Tables Vol C Tables 4.2.6.8 and 6.1.1.4' 
 'Ce'  'Ce'  -0.2486   2.6331 
 'International Tables Vol C Tables 4.2.6.8 and 6.1.1.4' 
 
_symmetry_cell_setting            'triclinic' 
_symmetry_space_group_name_H-M    'p -1' 
_symmetry_space_group_name_Hall   '-p 1' 
 
loop_ 
 _symmetry_equiv_pos_as_xyz 
 'x, y, z' 
 '-x, -y, -z' 
 
_cell_length_a                    15.7428(17) 
_cell_length_b                    16.5562(19) 
_cell_length_c                    16.976(2) 
_cell_angle_alpha                 99.8660(10) 
_cell_angle_beta                  95.6170(10) 
_cell_angle_gamma                 115.060(2) 
_cell_volume                      3876.1(8) 
_cell_formula_units_Z             2 
_cell_measurement_temperature     295(2) 
_cell_measurement_reflns_used     1005 
_cell_measurement_theta_min       2.43
_cell_measurement_theta_max       23.04 
 
_exptl_crystal_description        block 
_exptl_crystal_colour             red 
_exptl_crystal_size_max           0.20 
_exptl_crystal_size_mid           0.18 
_exptl_crystal_size_min           0.15 
_exptl_crystal_density_meas       ? 
_exptl_crystal_density_diffrn     0.976 
_exptl_crystal_density_method     'not measured' 
_exptl_crystal_F_000              1120 
_exptl_absorpt_coefficient_mu     1.203 
_exptl_absorpt_correction_type    'multi-scan'
_exptl_absorpt_correction_T_min   0.7949 
_exptl_absorpt_correction_T_max   0.8402 
_exptl_absorpt_process_details    'SADABS; Bruker, 2000'
 
_exptl_special_details 
; 
 ? 
; 
 
_diffrn_ambient_temperature       295(2) 
_diffrn_radiation_wavelength      0.71073 
_diffrn_radiation_type            MoK\a 
_diffrn_radiation_source         'sealed tube'
_diffrn_radiation_monochromator  'graphite'
_diffrn_measurement_device_type  'Bruker Smart Apex CCD'
_diffrn_measurement_method       'phi and omega scans'
_diffrn_detector_area_resol_mean  ? 
_diffrn_standards_number          ? 
_diffrn_standards_interval_count  ? 
_diffrn_standards_interval_time   ? 
_diffrn_standards_decay_%         ? 
_diffrn_reflns_number             18927 
_diffrn_reflns_av_R_equivalents   0.0766 
_diffrn_reflns_av_sigmaI/netI     0.1121 
_diffrn_reflns_limit_h_min        -18 
_diffrn_reflns_limit_h_max        10 
_diffrn_reflns_limit_k_min        -19 
_diffrn_reflns_limit_k_max        19 
_diffrn_reflns_limit_l_min        -18 
_diffrn_reflns_limit_l_max        20 
_diffrn_reflns_theta_min          1.91 
_diffrn_reflns_theta_max          25.02 
_reflns_number_total              13278 
_reflns_number_gt                 10168 
_reflns_threshold_expression      >2sigma(I) 
 
_computing_data_collection      'SMART (Bruker, 2000)'
_computing_cell_refinement      'SMART'
_computing_data_reduction       'SAINT (Bruker, 2000)'
_computing_structure_solution   'SHELXTL (Bruker, 2000)'
_computing_structure_refinement 'SHELXTL'
_computing_molecular_graphics   'SHELXTL'
_computing_publication_material 'SHELXTL'
 
_refine_special_details 
; 
 Refinement of F^2^ against ALL reflections.  The weighted R-factor wR and 
 goodness of fit S are based on F^2^, conventional R-factors R are based 
 on F, with F set to zero for negative F^2^. The threshold expression of 
 F^2^ > 2sigma(F^2^) is used only for calculating R-factors(gt) etc. and is 
 not relevant to the choice of reflections for refinement.  R-factors based 
 on F^2^ are statistically about twice as large as those based on F, and R- 
 factors based on ALL data will be even larger. 
; 
 
_refine_ls_structure_factor_coef  Fsqd  
_refine_ls_matrix_type            full 
_refine_ls_weighting_scheme       calc  
_refine_ls_weighting_details 
 'calc w=1/[\s^2^(Fo^2^)+(0.0903P)^2^+5.0000P] where P=(Fo^2^+2Fc^2^)/3' 
_atom_sites_solution_primary      direct 
_atom_sites_solution_secondary    difmap 
_atom_sites_solution_hydrogens    geom 
_refine_ls_hydrogen_treatment     constr 
_refine_ls_extinction_method      none 
_refine_ls_extinction_coef        ? 
_refine_ls_number_reflns          13278 
_refine_ls_number_parameters      586 
_refine_ls_number_restraints      0 
_refine_ls_R_factor_all           0.1278 
_refine_ls_R_factor_gt            0.0997 
_refine_ls_wR_factor_ref          0.2273 
_refine_ls_wR_factor_gt           0.2170 
_refine_ls_goodness_of_fit_ref    1.261 
_refine_ls_restrained_S_all       1.268 
_refine_ls_shift/su_max           0.001 
_refine_ls_shift/su_mean          0.000 
 
loop_ 
 _atom_site_label 
 _atom_site_type_symbol 
 _atom_site_fract_x 
 _atom_site_fract_y 
 _atom_site_fract_z 
 _atom_site_U_iso_or_equiv 
 _atom_site_adp_type 
 _atom_site_occupancy 
 _atom_site_symmetry_multiplicity 
 _atom_site_calc_flag 
 _atom_site_refinement_flags 
 _atom_site_disorder_assembly 
 _atom_site_disorder_group 
Ce1 Ce 0.52894(4) 0.53929(4) 0.63452(3) 0.01710(17) Uani 1 1 d U . . 
Ce2 Ce 0.55302(5) 0.48262(4) 0.86026(4) 0.02639(19) Uani 1 1 d U . . 
O1 O 0.4306(6) 0.4942(5) 0.7464(4) 0.0318(18) Uani 1 1 d . . . 
O2 O 0.3749(5) 0.4490(5) 0.8480(4) 0.0307(13) Uani 1 1 d U . . 
O3 O -0.3939(6) 0.4241(6) 0.4085(5) 0.038(2) Uani 1 1 d . . . 
O4 O -0.4009(5) 0.4826(5) 0.5315(5) 0.0335(18) Uani 1 1 d . . . 
O5 O 0.5445(8) 0.6206(6) 0.9221(6) 0.054(3) Uani 1 1 d . . . 
O7 O 0.6478(5) 0.6016(5) 0.7959(5) 0.0370(13) Uani 1 1 d U . . 
O8 O 0.7133(6) 0.6381(6) 0.6928(5) 0.0427(16) Uani 1 1 d U . . 
O9 O 0.6003(5) 0.6617(5) 0.5599(4) 0.0302(15) Uani 1 1 d U . . 
O10 O 0.6018(6) 0.6147(5) 0.4302(5) 0.036(2) Uani 1 1 d . . . 
O11 O 0.5550(6) 0.4160(5) 0.6978(5) 0.0344(19) Uani 1 1 d . . . 
O12 O 0.4676(7) 0.3218(5) 0.7691(5) 0.0473(18) Uani 1 1 d U . . 
O14 O 0.6836(8) 0.5661(8) 0.9930(6) 0.072(3) Uani 1 1 d U . . 
H14B H 0.7230 0.5434 0.9936 0.086 Uiso 1 1 d R . . 
H14C H 0.6583 0.5593 1.0349 0.086 Uiso 1 1 d R . . 
O15 O 0.5486(8) 0.6966(5) 0.7241(5) 0.051(2) Uani 1 1 d U . . 
H15B H 0.5614 0.6959 0.7737 0.061 Uiso 1 1 d R . . 
H15C H 0.4949 0.6975 0.7167 0.061 Uiso 1 1 d R . . 
C2 C 0.2694(9) 0.4567(11) 0.7517(8) 0.048(3) Uani 1 1 d U . . 
C3 C 0.2171(11) 0.4760(13) 0.8044(10) 0.068(5) Uani 1 1 d U . . 
H3 H 0.2369 0.4853 0.8601 0.082 Uiso 1 1 calc R . . 
C4 C 0.1326(12) 0.4822(14) 0.7759(11) 0.078(6) Uani 1 1 d . . . 
H4 H 0.1033 0.5073 0.8107 0.094 Uiso 1 1 calc R . . 
C5 C 0.0965(11) 0.4482(13) 0.6926(10) 0.067(5) Uani 1 1 d . . . 
C6 C 0.1494(10) 0.4310(12) 0.6416(9) 0.061(4) Uani 1 1 d . . . 
H6 H 0.1273 0.4152 0.5856 0.073 Uiso 1 1 calc R . . 
C7 C 0.2372(10) 0.4368(11) 0.6721(9) 0.053(4) Uani 1 1 d . . . 
H7 H 0.2744 0.4266 0.6361 0.064 Uiso 1 1 calc R . . 
C8 C -0.1066(11) 0.4382(13) 0.5727(10) 0.064(4) Uani 1 1 d . . . 
C9 C -0.1444(12) 0.4808(13) 0.6263(11) 0.074(5) Uani 1 1 d . . . 
H9 H -0.1162 0.5056 0.6811 0.089 Uiso 1 1 calc R . . 
C10 C -0.2265(11) 0.4842(12) 0.5935(10) 0.068(5) Uani 1 1 d . . . 
H10 H -0.2512 0.5146 0.6284 0.082 Uiso 1 1 calc R . . 
C11 C -0.2754(9) 0.4466(10) 0.5136(8) 0.043(3) Uani 1 1 d U . . 
C12 C -0.2350(10) 0.4009(11) 0.4656(9) 0.054(4) Uani 1 1 d U . . 
H12 H -0.2656 0.3727 0.4117 0.065 Uiso 1 1 calc R . . 
C13 C -0.1521(10) 0.3945(11) 0.4927(9) 0.058(4) Uani 1 1 d . . . 
H13 H -0.1284 0.3623 0.4585 0.069 Uiso 1 1 calc R . . 
C14 C -0.3607(8) 0.4524(9) 0.4822(7) 0.034(3) Uani 1 1 d . . . 
C16 C 0.5139(15) 0.7359(10) 0.9975(10) 0.069(5) Uani 1 1 d . . . 
C17 C 0.5377(15) 0.7839(10) 0.9407(10) 0.073(5) Uani 1 1 d . . . 
H17 H 0.5582 0.7620 0.8959 0.087 Uiso 1 1 calc R . . 
C18 C 0.5322(16) 0.8658(11) 0.9481(11) 0.084(6) Uani 1 1 d . . . 
H18 H 0.5500 0.9001 0.9092 0.101 Uiso 1 1 calc R . . 
C19 C 0.5000(17) 0.8957(11) 1.0136(11) 0.081(6) Uani 1 1 d . . . 
C20 C 0.4900(16) 0.8544(10) 1.0751(11) 0.079(6) Uani 1 1 d . . . 
H20 H 0.4827 0.8824 1.1246 0.095 Uiso 1 1 calc R . . 
C21 C 0.4904(15) 0.7704(10) 1.0659(10) 0.073(6) Uani 1 1 d . . . 
H21 H 0.4747 0.7376 1.1060 0.088 Uiso 1 1 calc R . . 
C22 C 0.7140(9) 0.6537(8) 0.7658(8) 0.040(3) Uani 1 1 d . . . 
C23 C 0.7905(9) 0.7393(9) 0.8226(7) 0.047(4) Uani 1 1 d . . . 
C24 C 0.8690(10) 0.7915(10) 0.7920(9) 0.063(5) Uani 1 1 d . . . 
H24 H 0.8762 0.7712 0.7396 0.076 Uiso 1 1 calc R . . 
C25 C 0.9366(11) 0.8751(10) 0.8417(9) 0.072(5) Uani 1 1 d . . . 
H25 H 0.9875 0.9129 0.8209 0.087 Uiso 1 1 calc R . . 
C26 C 0.9300(12) 0.9025(10) 0.9191(9) 0.068(5) Uani 1 1 d . . . 
C27 C 0.8499(11) 0.8499(10) 0.9491(9) 0.065(5) Uani 1 1 d . . . 
H27 H 0.8429 0.8689 1.0019 0.078 Uiso 1 1 calc R . . 
C28 C 0.7816(11) 0.7689(9) 0.8982(8) 0.061(5) Uani 1 1 d . . . 
H28 H 0.7276 0.7336 0.9171 0.073 Uiso 1 1 calc R . . 
C29 C 0.6352(8) 0.6694(7) 0.4987(7) 0.031(3) Uani 1 1 d . . . 
C30 C 0.7243(9) 0.7542(8) 0.5031(7) 0.036(3) Uani 1 1 d . . . 
C31 C 0.7567(10) 0.7806(9) 0.4343(8) 0.054(4) Uani 1 1 d . . . 
H31 H 0.7208 0.7460 0.3829 0.065 Uiso 1 1 calc R . . 
C32 C 0.8424(10) 0.8584(9) 0.4413(9) 0.059(4) Uani 1 1 d . . . 
H32 H 0.8636 0.8756 0.3948 0.071 Uiso 1 1 calc R . . 
C33 C 0.8960(10) 0.9101(9) 0.5177(8) 0.056(4) Uani 1 1 d . . . 
C34 C 0.8652(10) 0.8853(9) 0.5875(8) 0.054(4) Uani 1 1 d . . . 
H34 H 0.9014 0.9194 0.6389 0.065 Uiso 1 1 calc R . . 
C35 C 0.7786(10) 0.8077(9) 0.5787(8) 0.054(4) Uani 1 1 d . . . 
H35 H 0.7565 0.7914 0.6252 0.064 Uiso 1 1 calc R . . 
C36 C 0.5080(11) 0.3361(8) 0.7101(8) 0.047(4) Uani 1 1 d . . . 
C37 C 0.5088(11) 0.2576(8) 0.6516(8) 0.051(4) Uani 1 1 d . . . 
C38 C 0.4720(14) 0.1715(10) 0.6713(10) 0.070(5) Uani 1 1 d . . . 
H38 H 0.4464 0.1632 0.7181 0.084 Uiso 1 1 calc R . . 
C39 C 0.4754(14) 0.0989(10) 0.6179(10) 0.076(6) Uani 1 1 d . . . 
H39 H 0.4534 0.0420 0.6309 0.091 Uiso 1 1 calc R . . 
C40 C 0.5099(13) 0.1085(9) 0.5475(9) 0.061(4) Uani 1 1 d . . . 
C41 C 0.5381(13) 0.1916(9) 0.5281(9) 0.065(5) Uani 1 1 d . . . 
H41 H 0.5574 0.1989 0.4787 0.078 Uiso 1 1 calc R . . 
C42 C 0.5381(12) 0.2642(9) 0.5807(9) 0.054(4) Uani 1 1 d . . . 
H42 H 0.5593 0.3204 0.5664 0.065 Uiso 1 1 calc R . . 
N1 N 0.0080(10) 0.4540(12) 0.6685(9) 0.078(4) Uani 1 1 d . . . 
N2 N -0.0223(9) 0.4279(11) 0.5962(9) 0.071(4) Uani 1 1 d . . . 
N3 N 0.4951(15) 0.9839(10) 1.0292(9) 0.091(6) Uani 1 1 d . . . 
N4 N 1.0053(11) 0.9875(10) 0.9660(8) 0.075(4) Uani 1 1 d . . . 
N5 N 0.9872(9) 0.9922(8) 0.5314(7) 0.061(4) Uani 1 1 d . . . 
N6 N 0.5111(12) 0.0355(8) 0.4894(8) 0.066(4) Uani 1 1 d . . . 
C15 C 0.5209(12) 0.6482(9) 0.9863(8) 0.051(4) Uani 1 1 d . . . 
O13 O 0.6807(9) 0.4244(9) 0.8500(7) 0.077(3) Uani 1 1 d U . . 
H13B H 0.6438 0.3680 0.8455 0.093 Uiso 1 1 d R . . 
H13C H 0.7065 0.4438 0.9002 0.093 Uiso 1 1 d R . . 
O6 O 0.4951(9) 0.6017(6) 1.0375(6) 0.058(3) Uani 1 1 d . . . 
C1 C 0.3637(8) 0.4680(9) 0.7845(7) 0.0347(19) Uani 1 1 d U . . 
 
loop_ 
 _atom_site_aniso_label 
 _atom_site_aniso_U_11 
 _atom_site_aniso_U_22 
 _atom_site_aniso_U_33 
 _atom_site_aniso_U_23 
 _atom_site_aniso_U_13 
 _atom_site_aniso_U_12 
Ce1 0.0090(3) 0.0145(3) 0.0170(3) 0.0004(2) 0.0027(2) -0.0035(2) 
Ce2 0.0362(4) 0.0249(3) 0.0261(3) 0.0046(3) 0.0087(3) 0.0212(3) 
O1 0.034(4) 0.038(4) 0.027(4) 0.009(3) 0.011(3) 0.018(4) 
O2 0.0324(16) 0.035(4) 0.026(3) 0.014(3) 0.009(2) 0.013(3) 
O3 0.035(5) 0.051(5) 0.038(5) 0.010(4) 0.015(4) 0.027(4) 
O4 0.025(4) 0.028(4) 0.042(5) -0.003(3) 0.003(4) 0.011(3) 
O5 0.082(7) 0.038(5) 0.044(6) 0.011(4) 0.031(5) 0.026(5) 
O7 0.025(2) 0.034(3) 0.0263(18) 0.002(2) -0.0076(14) -0.0059(18) 
O8 0.022(2) 0.041(5) 0.028(4) 0.003(3) -0.0095(18) -0.015(2) 
O9 0.032(4) 0.015(3) 0.031(2) 0.004(2) 0.006(3) 0.000(3) 
O10 0.031(4) 0.030(4) 0.028(4) 0.006(3) 0.017(4) -0.005(4) 
O11 0.043(5) 0.027(4) 0.036(4) 0.001(3) 0.012(4) 0.020(4) 
O12 0.084(5) 0.0210(18) 0.045(4) 0.0139(15) 0.030(4) 0.025(2) 
O14 0.064(7) 0.109(9) 0.032(5) 0.010(5) -0.004(3) 0.034(7) 
O15 0.099(6) 0.029(3) 0.031(4) 0.010(2) 0.020(4) 0.033(5) 
C2 0.036(7) 0.080(10) 0.036(7) 0.017(7) 0.011(5) 0.031(7) 
C3 0.048(9) 0.104(14) 0.052(9) 0.005(9) 0.018(7) 0.037(9) 
C4 0.050(10) 0.119(16) 0.063(11) 0.009(10) 0.011(8) 0.041(11) 
C5 0.039(8) 0.109(14) 0.062(10) 0.014(10) 0.008(7) 0.045(9) 
C6 0.036(8) 0.101(13) 0.046(8) 0.015(8) 0.009(7) 0.031(9) 
C7 0.044(8) 0.081(11) 0.046(8) 0.022(8) 0.012(7) 0.036(8) 
C8 0.043(9) 0.092(12) 0.060(10) 0.007(9) 0.005(8) 0.038(9) 
C9 0.050(10) 0.099(14) 0.068(11) -0.002(10) -0.002(8) 0.040(10) 
C10 0.049(9) 0.087(12) 0.063(10) -0.012(9) 0.005(8) 0.037(9) 
C11 0.036(7) 0.060(8) 0.041(7) 0.004(6) 0.013(6) 0.031(6) 
C12 0.040(8) 0.076(10) 0.054(9) -0.002(7) 0.013(6) 0.038(8) 
C13 0.042(8) 0.087(11) 0.058(9) 0.010(8) 0.015(7) 0.044(8) 
C14 0.027(6) 0.049(7) 0.034(7) 0.004(5) 0.011(5) 0.025(6) 
C16 0.130(16) 0.037(8) 0.058(10) 0.014(7) 0.033(10) 0.050(10) 
C17 0.134(17) 0.048(9) 0.065(10) 0.019(8) 0.040(11) 0.060(11) 
C18 0.15(2) 0.055(10) 0.072(12) 0.027(9) 0.041(13) 0.062(12) 
C19 0.16(2) 0.049(9) 0.076(12) 0.027(9) 0.045(13) 0.071(12) 
C20 0.149(19) 0.048(9) 0.072(11) 0.022(8) 0.043(12) 0.067(12) 
C21 0.137(17) 0.047(9) 0.064(10) 0.018(8) 0.042(11) 0.060(11) 
C22 0.033(7) 0.027(6) 0.040(7) 0.003(5) 0.004(6) -0.004(5) 
C23 0.037(7) 0.045(7) 0.028(6) -0.005(5) 0.004(5) -0.007(6) 
C24 0.044(8) 0.056(9) 0.039(8) -0.004(7) 0.004(6) -0.018(7) 
C25 0.050(9) 0.056(9) 0.049(9) -0.008(7) 0.004(7) -0.024(8) 
C26 0.056(10) 0.050(9) 0.044(9) -0.011(7) 0.001(7) -0.017(8) 
C27 0.056(10) 0.053(9) 0.046(9) -0.007(7) 0.010(7) -0.006(8) 
C28 0.054(9) 0.044(8) 0.037(8) -0.009(6) 0.008(7) -0.016(7) 
C29 0.027(6) 0.019(5) 0.040(7) 0.006(5) 0.006(5) 0.006(5) 
C30 0.032(7) 0.026(6) 0.034(6) 0.004(5) 0.003(5) -0.001(5) 
C31 0.039(8) 0.040(7) 0.041(8) -0.002(6) 0.003(6) -0.014(6) 
C32 0.050(9) 0.045(8) 0.047(8) 0.017(7) 0.014(7) -0.015(7) 
C33 0.042(8) 0.039(7) 0.046(8) 0.007(6) 0.006(7) -0.017(6) 
C34 0.041(8) 0.041(8) 0.044(8) 0.001(6) 0.002(6) -0.011(6) 
C35 0.040(8) 0.045(8) 0.040(7) 0.007(6) 0.007(6) -0.014(6) 
C36 0.075(10) 0.024(6) 0.049(8) 0.013(6) 0.019(7) 0.027(7) 
C37 0.077(10) 0.027(6) 0.047(8) 0.000(6) 0.024(8) 0.023(7) 
C38 0.103(14) 0.036(8) 0.062(10) 0.002(7) 0.036(10) 0.023(9) 
C39 0.114(16) 0.032(8) 0.070(11) 0.009(7) 0.034(11) 0.020(9) 
C40 0.088(12) 0.035(8) 0.060(10) -0.001(7) 0.030(9) 0.027(8) 
C41 0.107(14) 0.028(7) 0.055(9) 0.002(6) 0.040(9) 0.023(8) 
C42 0.082(11) 0.028(7) 0.056(9) 0.007(6) 0.032(8) 0.026(7) 
N1 0.047(8) 0.115(13) 0.069(10) 0.011(9) 0.010(7) 0.039(9) 
N2 0.047(8) 0.102(11) 0.063(9) 0.010(8) 0.011(7) 0.036(8) 
N3 0.167(17) 0.059(9) 0.080(11) 0.030(8) 0.047(12) 0.070(11) 
N4 0.064(9) 0.055(8) 0.062(9) -0.006(7) 0.011(8) -0.006(7) 
N5 0.044(7) 0.045(7) 0.048(7) 0.004(6) 0.008(6) -0.019(6) 
N6 0.099(11) 0.037(6) 0.059(8) 0.002(6) 0.031(7) 0.028(7) 
C15 0.102(12) 0.033(7) 0.046(8) 0.024(6) 0.026(8) 0.049(8) 
O13 0.091(4) 0.130(6) 0.064(6) 0.033(6) 0.010(5) 0.095(5) 
O6 0.111(9) 0.030(5) 0.048(6) 0.009(4) 0.018(6) 0.044(6) 
C1 0.030(2) 0.059(5) 0.028(5) 0.023(5) 0.018(2) 0.024(3) 
 
_geom_special_details 
; 
 All esds (except the esd in the dihedral angle between two l.s. planes) 
 are estimated using the full covariance matrix.  The cell esds are taken 
 into account individually in the estimation of esds in distances, angles 
 and torsion angles; correlations between esds in cell parameters are only 
 used when they are defined by crystal symmetry.  An approximate (isotropic) 
 treatment of cell esds is used for estimating esds involving l.s. planes. 
; 
 
loop_ 
 _geom_bond_atom_site_label_1 
 _geom_bond_atom_site_label_2 
 _geom_bond_distance 
 _geom_bond_site_symmetry_2 
 _geom_bond_publ_flag 
Ce1 O4 2.420(8) 1_655 ? 
Ce1 O10 2.469(7) 2_666 ? 
Ce1 O9 2.490(7) . ? 
Ce1 O3 2.522(8) 2_566 ? 
Ce1 O1 2.577(7) . ? 
Ce1 O11 2.620(8) . ? 
Ce1 O8 2.635(7) . ? 
Ce1 O15 2.658(8) . ? 
Ce1 O7 2.909(7) . ? 
Ce1 Ce2 4.1180(9) . ? 
Ce2 O6 2.393(9) 2_667 ? 
Ce2 O5 2.409(9) . ? 
Ce2 O7 2.422(8) . ? 
Ce2 O12 2.538(8) . ? 
Ce2 O13 2.579(9) . ? 
Ce2 O2 2.597(8) . ? 
Ce2 O14 2.614(10) . ? 
Ce2 O1 2.683(8) . ? 
Ce2 O11 2.797(8) . ? 
Ce2 C36 2.993(13) . ? 
Ce2 C1 3.021(12) . ? 
O1 C1 1.249(12) . ? 
O2 C1 1.191(13) . ? 
O3 C14 1.234(14) . ? 
O3 Ce1 2.522(8) 2_566 ? 
O4 C14 1.257(13) . ? 
O4 Ce1 2.420(8) 1_455 ? 
O5 C15 1.260(15) . ? 
O7 C22 1.259(14) . ? 
O8 C22 1.221(14) . ? 
O9 C29 1.222(13) . ? 
O10 C29 1.251(13) . ? 
O10 Ce1 2.469(7) 2_666 ? 
O11 C36 1.279(15) . ? 
O12 C36 1.243(15) . ? 
O14 H14B 0.8498 . ? 
O14 H14C 0.8499 . ? 
O15 H15B 0.8499 . ? 
O15 H15C 0.8501 . ? 
C2 C7 1.328(18) . ? 
C2 C3 1.361(19) . ? 
C2 C1 1.455(17) . ? 
C3 C4 1.42(2) . ? 
C3 H3 0.9300 . ? 
C4 C5 1.39(2) . ? 
C4 H4 0.9300 . ? 
C5 C6 1.34(2) . ? 
C5 N1 1.460(19) . ? 
C6 C7 1.386(19) . ? 
C6 H6 0.9300 . ? 
C7 H7 0.9300 . ? 
C8 C13 1.38(2) . ? 
C8 C9 1.38(2) . ? 
C8 N2 1.44(2) . ? 
C9 C10 1.38(2) . ? 
C9 H9 0.9300 . ? 
C10 C11 1.39(2) . ? 
C10 H10 0.9300 . ? 
C11 C12 1.390(17) . ? 
C11 C14 1.444(17) . ? 
C12 C13 1.395(19) . ? 
C12 H12 0.9300 . ? 
C13 H13 0.9300 . ? 
C16 C17 1.33(2) . ? 
C16 C21 1.36(2) . ? 
C16 C15 1.484(17) . ? 
C17 C18 1.38(2) . ? 
C17 H17 0.9300 . ? 
C18 C19 1.37(2) . ? 
C18 H18 0.9300 . ? 
C19 C20 1.33(2) . ? 
C19 N3 1.473(19) . ? 
C20 C21 1.374(19) . ? 
C20 H20 0.9300 . ? 
C21 H21 0.9300 . ? 
C22 C23 1.499(16) . ? 
C23 C28 1.335(18) . ? 
C23 C24 1.385(18) . ? 
C24 C25 1.393(18) . ? 
C24 H24 0.9300 . ? 
C25 C26 1.34(2) . ? 
C25 H25 0.9300 . ? 
C26 C27 1.40(2) . ? 
C26 N4 1.427(17) . ? 
C27 C28 1.379(18) . ? 
C27 H27 0.9300 . ? 
C28 H28 0.9300 . ? 
C29 C30 1.490(15) . ? 
C30 C35 1.384(17) . ? 
C30 C31 1.385(17) . ? 
C31 C32 1.392(16) . ? 
C31 H31 0.9300 . ? 
C32 C33 1.386(19) . ? 
C32 H32 0.9300 . ? 
C33 C34 1.385(18) . ? 
C33 N5 1.462(15) . ? 
C34 C35 1.393(16) . ? 
C34 H34 0.9300 . ? 
C35 H35 0.9300 . ? 
C36 C37 1.499(16) . ? 
C37 C42 1.336(18) . ? 
C37 C38 1.409(19) . ? 
C38 C39 1.40(2) . ? 
C38 H38 0.9300 . ? 
C39 C40 1.37(2) . ? 
C39 H39 0.9300 . ? 
C40 C41 1.37(2) . ? 
C40 N6 1.432(17) . ? 
C41 C42 1.368(17) . ? 
C41 H41 0.9300 . ? 
C42 H42 0.9300 . ? 
N1 N2 1.204(18) . ? 
N3 N3 1.20(3) 2_677 ? 
N4 N4 1.21(2) 2_777 ? 
N5 N5 1.21(2) 2_776 ? 
N6 N6 1.21(2) 2_656 ? 
C15 O6 1.244(15) . ? 
O13 H13B 0.8499 . ? 
O13 H13C 0.8499 . ? 
O6 Ce2 2.393(9) 2_667 ? 
 
loop_ 
 _geom_angle_atom_site_label_1 
 _geom_angle_atom_site_label_2 
 _geom_angle_atom_site_label_3 
 _geom_angle 
 _geom_angle_site_symmetry_1 
 _geom_angle_site_symmetry_3 
 _geom_angle_publ_flag 
O4 Ce1 O10 78.0(2) 1_655 2_666 ? 
O4 Ce1 O9 72.7(3) 1_655 . ? 
O10 Ce1 O9 123.7(2) 2_666 . ? 
O4 Ce1 O3 119.3(3) 1_655 2_566 ? 
O10 Ce1 O3 78.1(3) 2_666 2_566 ? 
O9 Ce1 O3 76.2(3) . 2_566 ? 
O4 Ce1 O1 143.1(3) 1_655 . ? 
O10 Ce1 O1 75.6(2) 2_666 . ? 
O9 Ce1 O1 144.0(3) . . ? 
O3 Ce1 O1 79.6(3) 2_566 . ? 
O4 Ce1 O11 79.8(3) 1_655 . ? 
O10 Ce1 O11 70.2(3) 2_666 . ? 
O9 Ce1 O11 144.3(3) . . ? 
O3 Ce1 O11 138.5(3) 2_566 . ? 
O1 Ce1 O11 67.3(2) . . ? 
O4 Ce1 O8 77.6(3) 1_655 . ? 
O10 Ce1 O8 146.4(3) 2_666 . ? 
O9 Ce1 O8 69.4(3) . . ? 
O3 Ce1 O8 134.5(3) 2_566 . ? 
O1 Ce1 O8 112.9(3) . . ? 
O11 Ce1 O8 83.0(3) . . ? 
O4 Ce1 O15 140.3(3) 1_655 . ? 
O10 Ce1 O15 137.7(3) 2_666 . ? 
O9 Ce1 O15 71.5(2) . . ? 
O3 Ce1 O15 67.3(3) 2_566 . ? 
O1 Ce1 O15 74.8(3) . . ? 
O11 Ce1 O15 122.9(2) . . ? 
O8 Ce1 O15 74.1(3) . . ? 
O4 Ce1 O7 112.2(3) 1_655 . ? 
O10 Ce1 O7 128.0(2) 2_666 . ? 
O9 Ce1 O7 107.5(2) . . ? 
O3 Ce1 O7 126.4(3) 2_566 . ? 
O1 Ce1 O7 67.4(2) . . ? 
O11 Ce1 O7 62.6(2) . . ? 
O8 Ce1 O7 45.6(2) . . ? 
O15 Ce1 O7 64.1(3) . . ? 
O4 Ce1 Ce2 119.0(2) 1_655 . ? 
O10 Ce1 Ce2 93.93(18) 2_666 . ? 
O9 Ce1 Ce2 142.34(17) . . ? 
O3 Ce1 Ce2 117.55(18) 2_566 . ? 
O1 Ce1 Ce2 39.40(18) . . ? 
O11 Ce1 Ce2 42.15(16) . . ? 
O8 Ce1 Ce2 78.26(18) . . ? 
O15 Ce1 Ce2 81.76(18) . . ? 
O7 Ce1 Ce2 35.29(15) . . ? 
O6 Ce2 O5 99.4(3) 2_667 . ? 
O6 Ce2 O7 159.9(3) 2_667 . ? 
O5 Ce2 O7 72.8(3) . . ? 
O6 Ce2 O12 81.1(3) 2_667 . ? 
O5 Ce2 O12 147.8(4) . . ? 
O7 Ce2 O12 115.6(3) . . ? 
O6 Ce2 O13 87.3(4) 2_667 . ? 
O5 Ce2 O13 138.0(4) . . ? 
O7 Ce2 O13 86.9(4) . . ? 
O12 Ce2 O13 74.1(4) . . ? 
O6 Ce2 O2 78.1(3) 2_667 . ? 
O5 Ce2 O2 71.0(3) . . ? 
O7 Ce2 O2 115.1(3) . . ? 
O12 Ce2 O2 77.7(3) . . ? 
O13 Ce2 O2 149.9(4) . . ? 
O6 Ce2 O14 71.1(4) 2_667 . ? 
O5 Ce2 O14 71.3(4) . . ? 
O7 Ce2 O14 88.9(3) . . ? 
O12 Ce2 O14 136.6(4) . . ? 
O13 Ce2 O14 72.1(4) . . ? 
O2 Ce2 O14 125.6(3) . . ? 
O6 Ce2 O1 123.8(3) 2_667 . ? 
O5 Ce2 O1 77.1(3) . . ? 
O7 Ce2 O1 73.3(2) . . ? 
O12 Ce2 O1 76.2(3) . . ? 
O13 Ce2 O1 132.1(3) . . ? 
O2 Ce2 O1 47.3(2) . . ? 
O14 Ce2 O1 147.2(3) . . ? 
O6 Ce2 O11 128.3(3) 2_667 . ? 
O5 Ce2 O11 129.4(3) . . ? 
O7 Ce2 O11 66.6(2) . . ? 
O12 Ce2 O11 49.0(2) . . ? 
O13 Ce2 O11 68.8(3) . . ? 
O2 Ce2 O11 100.0(2) . . ? 
O14 Ce2 O11 134.3(3) . . ? 
O1 Ce2 O11 63.4(2) . . ? 
O6 Ce2 C36 103.4(3) 2_667 . ? 
O5 Ce2 C36 147.8(4) . . ? 
O7 Ce2 C36 91.8(3) . . ? 
O12 Ce2 C36 24.2(3) . . ? 
O13 Ce2 C36 66.1(4) . . ? 
O2 Ce2 C36 91.6(3) . . ? 
O14 Ce2 C36 138.0(4) . . ? 
O1 Ce2 C36 71.3(3) . . ? 
O11 Ce2 C36 25.2(3) . . ? 
O6 Ce2 C1 100.4(4) 2_667 . ? 
O5 Ce2 C1 72.4(4) . . ? 
O7 Ce2 C1 94.9(3) . . ? 
O12 Ce2 C1 75.9(3) . . ? 
O13 Ce2 C1 147.4(4) . . ? 
O2 Ce2 C1 22.9(2) . . ? 
O14 Ce2 C1 140.4(4) . . ? 
O1 Ce2 C1 24.4(2) . . ? 
O11 Ce2 C1 82.0(3) . . ? 
C36 Ce2 C1 81.3(4) . . ? 
O6 Ce2 Ce1 156.1(3) 2_667 . ? 
O5 Ce2 Ce1 90.5(2) . . ? 
O7 Ce2 Ce1 43.95(17) . . ? 
O12 Ce2 Ce1 79.06(19) . . ? 
O13 Ce2 Ce1 99.8(2) . . ? 
O2 Ce2 Ce1 84.80(16) . . ? 
O14 Ce2 Ce1 132.8(3) . . ? 
O1 Ce2 Ce1 37.57(16) . . ? 
O11 Ce2 Ce1 38.95(16) . . ? 
C36 Ce2 Ce1 60.3(2) . . ? 
C1 Ce2 Ce1 61.91(19) . . ? 
C1 O1 Ce1 163.4(8) . . ? 
C1 O1 Ce2 93.2(7) . . ? 
Ce1 O1 Ce2 103.0(3) . . ? 
C1 O2 Ce2 99.0(7) . . ? 
C14 O3 Ce1 113.2(7) . 2_566 ? 
C14 O4 Ce1 175.6(8) . 1_455 ? 
C15 O5 Ce2 135.6(8) . . ? 
C22 O7 Ce2 163.1(9) . . ? 
C22 O7 Ce1 86.9(7) . . ? 
Ce2 O7 Ce1 100.8(2) . . ? 
C22 O8 Ce1 101.0(7) . . ? 
C29 O9 Ce1 137.1(7) . . ? 
C29 O10 Ce1 139.3(7) . 2_666 ? 
C36 O11 Ce1 140.8(9) . . ? 
C36 O11 Ce2 85.9(7) . . ? 
Ce1 O11 Ce2 98.9(2) . . ? 
C36 O12 Ce2 98.9(7) . . ? 
Ce2 O14 H14B 109.6 . . ? 
Ce2 O14 H14C 110.5 . . ? 
H14B O14 H14C 108.5 . . ? 
Ce1 O15 H15B 107.1 . . ? 
Ce1 O15 H15C 108.0 . . ? 
H15B O15 H15C 107.1 . . ? 
C7 C2 C3 119.3(14) . . ? 
C7 C2 C1 121.9(12) . . ? 
C3 C2 C1 118.5(13) . . ? 
C2 C3 C4 121.1(15) . . ? 
C2 C3 H3 119.4 . . ? 
C4 C3 H3 119.4 . . ? 
C5 C4 C3 115.7(15) . . ? 
C5 C4 H4 122.1 . . ? 
C3 C4 H4 122.1 . . ? 
C6 C5 C4 121.0(14) . . ? 
C6 C5 N1 125.2(15) . . ? 
C4 C5 N1 112.5(14) . . ? 
C5 C6 C7 119.9(14) . . ? 
C5 C6 H6 120.1 . . ? 
C7 C6 H6 120.1 . . ? 
C2 C7 C6 121.4(14) . . ? 
C2 C7 H7 119.3 . . ? 
C6 C7 H7 119.3 . . ? 
C13 C8 C9 122.4(14) . . ? 
C13 C8 N2 113.7(14) . . ? 
C9 C8 N2 123.6(15) . . ? 
C10 C9 C8 116.1(15) . . ? 
C10 C9 H9 122.0 . . ? 
C8 C9 H9 122.0 . . ? 
C9 C10 C11 126.2(15) . . ? 
C9 C10 H10 116.9 . . ? 
C11 C10 H10 116.9 . . ? 
C10 C11 C12 113.5(13) . . ? 
C10 C11 C14 124.0(12) . . ? 
C12 C11 C14 122.4(12) . . ? 
C11 C12 C13 124.6(14) . . ? 
C11 C12 H12 117.7 . . ? 
C13 C12 H12 117.7 . . ? 
C8 C13 C12 117.0(13) . . ? 
C8 C13 H13 121.5 . . ? 
C12 C13 H13 121.5 . . ? 
O3 C14 O4 122.2(11) . . ? 
O3 C14 C11 119.0(10) . . ? 
O4 C14 C11 118.8(11) . . ? 
C17 C16 C21 120.2(14) . . ? 
C17 C16 C15 118.1(14) . . ? 
C21 C16 C15 121.6(14) . . ? 
C16 C17 C18 120.4(15) . . ? 
C16 C17 H17 119.8 . . ? 
C18 C17 H17 119.8 . . ? 
C19 C18 C17 118.8(16) . . ? 
C19 C18 H18 120.6 . . ? 
C17 C18 H18 120.6 . . ? 
C20 C19 C18 119.6(15) . . ? 
C20 C19 N3 115.7(14) . . ? 
C18 C19 N3 123.3(15) . . ? 
C19 C20 C21 120.3(16) . . ? 
C19 C20 H20 119.8 . . ? 
C21 C20 H20 119.8 . . ? 
C16 C21 C20 119.2(15) . . ? 
C16 C21 H21 120.4 . . ? 
C20 C21 H21 120.4 . . ? 
O8 C22 O7 121.5(11) . . ? 
O8 C22 C23 121.1(11) . . ? 
O7 C22 C23 117.2(11) . . ? 
C28 C23 C24 120.2(12) . . ? 
C28 C23 C22 122.2(12) . . ? 
C24 C23 C22 117.4(11) . . ? 
C23 C24 C25 118.1(14) . . ? 
C23 C24 H24 121.0 . . ? 
C25 C24 H24 121.0 . . ? 
C26 C25 C24 121.5(14) . . ? 
C26 C25 H25 119.2 . . ? 
C24 C25 H25 119.2 . . ? 
C25 C26 C27 119.7(13) . . ? 
C25 C26 N4 117.1(14) . . ? 
C27 C26 N4 123.1(14) . . ? 
C28 C27 C26 118.0(14) . . ? 
C28 C27 H27 121.0 . . ? 
C26 C27 H27 121.0 . . ? 
C23 C28 C27 122.2(14) . . ? 
C23 C28 H28 118.9 . . ? 
C27 C28 H28 118.9 . . ? 
O9 C29 O10 126.7(10) . . ? 
O9 C29 C30 118.1(10) . . ? 
O10 C29 C30 115.1(10) . . ? 
C35 C30 C31 118.4(11) . . ? 
C35 C30 C29 119.0(11) . . ? 
C31 C30 C29 122.6(10) . . ? 
C30 C31 C32 120.6(12) . . ? 
C30 C31 H31 119.7 . . ? 
C32 C31 H31 119.7 . . ? 
C33 C32 C31 119.9(12) . . ? 
C33 C32 H32 120.1 . . ? 
C31 C32 H32 120.1 . . ? 
C34 C33 C32 120.7(12) . . ? 
C34 C33 N5 115.3(11) . . ? 
C32 C33 N5 124.0(12) . . ? 
C33 C34 C35 118.2(12) . . ? 
C33 C34 H34 120.9 . . ? 
C35 C34 H34 120.9 . . ? 
C30 C35 C34 122.3(12) . . ? 
C30 C35 H35 118.9 . . ? 
C34 C35 H35 118.9 . . ? 
O12 C36 O11 123.8(11) . . ? 
O12 C36 C37 119.8(11) . . ? 
O11 C36 C37 116.3(12) . . ? 
O12 C36 Ce2 56.9(6) . . ? 
O11 C36 Ce2 68.8(6) . . ? 
C37 C36 Ce2 161.3(11) . . ? 
C42 C37 C38 118.7(12) . . ? 
C42 C37 C36 123.7(12) . . ? 
C38 C37 C36 117.5(12) . . ? 
C39 C38 C37 117.5(14) . . ? 
C39 C38 H38 121.2 . . ? 
C37 C38 H38 121.2 . . ? 
C40 C39 C38 122.5(14) . . ? 
C40 C39 H39 118.7 . . ? 
C38 C39 H39 118.7 . . ? 
C41 C40 C39 117.7(13) . . ? 
C41 C40 N6 117.6(13) . . ? 
C39 C40 N6 124.5(13) . . ? 
C40 C41 C42 120.7(14) . . ? 
C40 C41 H41 119.7 . . ? 
C42 C41 H41 119.7 . . ? 
C37 C42 C41 122.7(13) . . ? 
C37 C42 H42 118.7 . . ? 
C41 C42 H42 118.7 . . ? 
N2 N1 C5 113.2(14) . . ? 
N1 N2 C8 112.8(14) . . ? 
N3 N3 C19 111.2(18) 2_677 . ? 
N4 N4 C26 115.4(18) 2_777 . ? 
N5 N5 C33 112.4(14) 2_776 . ? 
N6 N6 C40 114.9(16) 2_656 . ? 
O6 C15 O5 123.1(11) . . ? 
O6 C15 C16 118.0(12) . . ? 
O5 C15 C16 118.6(12) . . ? 
Ce2 O13 H13B 97.1 . . ? 
Ce2 O13 H13C 96.3 . . ? 
H13B O13 H13C 103.5 . . ? 
C15 O6 Ce2 177.9(8) . 2_667 ? 
O2 C1 O1 120.6(11) . . ? 
O2 C1 C2 118.1(10) . . ? 
O1 C1 C2 121.3(10) . . ? 
O2 C1 Ce2 58.1(6) . . ? 
O1 C1 Ce2 62.5(6) . . ? 
C2 C1 Ce2 176.0(9) . . ? 
 
_diffrn_measured_fraction_theta_max    0.970 
_diffrn_reflns_theta_full              25.02 
_diffrn_measured_fraction_theta_full   0.970 
_refine_diff_density_max    2.270 
_refine_diff_density_min   -3.639 
_refine_diff_density_rms    0.172 
